# Supplementary material for: Targeting extracellular glycans: tuning multimeric boronic acids for pathogen-selective killing of Mycobacterium tuberculosis
Source: Chem Sci. 2019 May 16;10(23):5935–42. doi: 10.1039/c9sc00415g (PMC6566077; doi:10.1039/c9sc00415g)
Supplement: Supplementary file 1 [file SC-010-C9SC00415G-s001.xlsx]

## Sheet: All proteins
Fasta headers	functional category	ORF number Mtb	1st Accession number	2nd Accession number	Mol. weight [kDa]	Sequence coverage [%]	LFQ intensity Control3A	LFQ intensity Control3B	LFQ intensity Control24A	LFQ intensity Control24B	LFQ intensity Control48A	LFQ intensity Control48B	LFQ intensity Dimer3A	LFQ intensity Dimer3B	LFQ intensity Dimer24A	LFQ intensity Dimer24B	LFQ intensity Dimer48A	LFQ intensity Dimer48B	Unique peptides	Unique peptides Control3A	Unique peptides Control3B	Unique peptides Control24A	Unique peptides Control24B	Unique peptides Control48A	Unique peptides Control48B	Unique peptides Dimer3A	Unique peptides Dimer3B	Unique peptides Dimer24A	Unique peptides Dimer24B	Unique peptides Dimer48A	Unique peptides Dimer48B	Q-value	Score
A0A0H3M499_MYCBP Probable polyketide beta-ketoacyl synthase pks3 OS=Mycobacterium bovis (strain BCG / Pasteur 1173P2) GN=pks3 PE=4 SV=1;MSL3_MYCTU Mycolipanoate synthase OS=Mycobacterium tuberculosis (strain ATCC 25618 / H37Rv) GN=msl3 PE=1 SV=2	Lipid metabolism	Rv1180/Rv1181	A0A0H3M499	A0A089QRB9	220.44	9.6	18.3525	19.8776	19.6785	21.2186	17.4023	21.5411	19.0276	20.2016	19.7217	19.6869	18.8578	18.9015	9	0	0	3	6	2	5	1	0	0	0	3	0	0	13.673
A0A0G2PF30_MYCBP Probable conserved transmembrane protein OS=Mycobacterium bovis (strain BCG / Pasteur 1173P2) GN=BCG_0027c PE=3 SV=1;YIDC_MYCTU Membrane protein insertase YidC OS=Mycobacterium tuberculosis (strain ATCC 25618 / H37Rv) GN=yidC PE=1 SV=1	cell wall and cell processes	Rv3921c	A0A0G2PF30	P9WIT5	40.944	21.3	23.2784	23.3817	24.7579	24.2501	22.9359	23.8244	18.6921	18.9452	19.7572	19.8483	23.1834	24.1606	5	1	2	2	3	2	3	1	1	1	0	4	2	0	14.4
A0A0G2Q9D4_MYCBP DNA polymerase III subunit beta OS=Mycobacterium bovis (strain BCG / Pasteur 1173P2) GN=dnaN_1 PE=4 SV=1;DPO3B_MYCTU DNA polymerase III subunit beta OS=Mycobacterium tuberculosis (strain ATCC 25618 / H37Rv) GN=dnaN PE=1 SV=1	information pathways	Rv0002	A0A0G2Q9D4	P9WNU1	42.055	46	23.8622	24.6978	23.9153	25.0396	24.5617	23.8966	24.3462	24.064	23.9525	24.3509	23.6713	23.4841	14	7	4	9	8	11	8	5	7	4	6	9	6	0	61.596
GYRB_MYCBP DNA gyrase subunit B OS=Mycobacterium bovis (strain BCG / Pasteur 1173P2) GN=gyrB1 PE=1 SV=1;GYRB_MYCTU DNA gyrase subunit B OS=Mycobacterium tuberculosis (strain ATCC 25618 / H37Rv) GN=gyrB PE=1 SV=1	information pathways	Rv0005	A0A0G2Q9D6	P9WG45	78.455	51.7	24.011	24.8818	23.1706	24.7417	21.9749	25.2771	24.1825	24.3701	23.8438	24.7391	24.8662	23.1745	24	15	10	18	11	16	8	7	10	7	7	17	13	0	219.85
Y007_MYCTU Uncharacterized protein Rv0007 OS=Mycobacterium tuberculosis (strain ATCC 25618 / H37Rv) GN=Rv0007 PE=1 SV=1;A0A0G2Q9D8_MYCBP Possible conserved membrane protein OS=Mycobacterium bovis (strain BCG / Pasteur 1173P2) GN=BCG_0007 PE=4 SV=1	cell wall and cell processes	Rv0007	P9WMA7	A0A0G2Q9D8	31.073	38.5	18.8546	19.3641	18.8135	18.3133	23.1913	17.817	18.437	16.4855	19.449	21.0467	18.2852	16.8965	9	6	0	6	2	8	6	1	2	1	1	5	3	0	38.433
PARB_MYCTU Probable chromosome-partitioning protein ParB OS=Mycobacterium tuberculosis (strain ATCC 25618 / H37Rv) GN=parB PE=1 SV=1;A0A0G2Q9E8_MYCBP Probable chromosome partitioning protein parB OS=Mycobacterium bovis (strain BCG / Pasteur 1173P2) GN=parB	cell wall and cell processes	Rv3917c	P9WIJ9	A0A0G2Q9E8	37.018	62.5	20.0661	19.2536	19.0934	21.9739	22.7822	19.9722	20.4778	19.9288	19.9064	19.6239	19.0775	21.1188	16	6	2	7	6	14	4	2	4	1	4	6	5	0	110.26
Q1LVD4_MYCTU Probable chromosome partitioning protein ParA OS=Mycobacterium tuberculosis (strain ATCC 25618 / H37Rv) GN=parA PE=1 SV=1;A0A0G2Q9E9_MYCBP Probable chromosome partitioning protein parA OS=Mycobacterium bovis (strain BCG / Pasteur 1173P2) GN=pa	cell wall and cell processes	Rv3918c	Q1LVD4	A0A0G2Q9E9	37.548	20.7	21.0944	21.595	22.1581	22.6481	18.0824	22.2636	19.9435	21.8405	19.1533	21.515	19.8034	20.9187	4	2	2	3	3	2	3	1	3	1	3	2	2	0	55.02
O53598_MYCTU Conserved protein similar to jag protein OS=Mycobacterium tuberculosis (strain ATCC 25618 / H37Rv) GN=Rv3920c PE=1 SV=1;A0A0G2Q9F0_MYCBP Uncharacterized protein OS=Mycobacterium bovis (strain BCG / Pasteur 1173P2) GN=BCG_0026c PE=4 SV=1	Conserved hypotheticals	Rv3920c	O53598	A0A0G2Q9F0	20.558	66.8	22.8406	22.4869	22.6326	21.7025	26.1641	21.8517	22.5454	21.4634	23.2035	21.2195	22.3469	23.9789	12	9	5	10	5	10	9	7	6	7	4	9	10	0	320.54
DNAA_MYCTU Chromosomal replication initiator protein DnaA OS=Mycobacterium tuberculosis (strain ATCC 25618 / H37Rv) GN=dnaA PE=1 SV=1;A0A0G2Q9F4_MYCBP Chromosomal replication initiator protein DnaA OS=Mycobacterium bovis (strain BCG / Pasteur 1173P2) GN=dn	information pathways	Rv0001	P9WNW3	A0A0G2Q9F4	56.566	27.4	21.7604	20.4041	19.6419	23.9869	20.058	21.4557	20.3368	22.7078	21.9422	21.3796	20.5422	17.5754	10	3	4	4	4	6	5	1	4	4	5	4	0	0	27.446
GYRA_MYCBP DNA gyrase subunit A OS=Mycobacterium bovis (strain BCG / Pasteur 1173P2) GN=gyrA1 PE=1 SV=1	Information pathways		A0A0G2Q9F8		92.344	44.7	22.6545	25.4829	23.7371	24.2941	21.8429	24.2899	25.0624	24.3919	24.5624	23.1459	25.1029	23.439	2	1	1	1	0	1	1	0	0	0	0	2	1	0	147.83
CWSA_MYCTU Cell wall synthesis protein CwsA OS=Mycobacterium tuberculosis (strain ATCC 25618 / H37Rv) GN=cwsA PE=1 SV=1;A0A0G2Q9F9_MYCBP Cell wall synthesis protein CwsA OS=Mycobacterium bovis (strain BCG / Pasteur 1173P2) GN=cwsA PE=3 SV=1	cell wall and cell processes	Rv0008c	P9WJF3	A0A0G2Q9F9	15.671	41.4	18.5816	23.9374	23.58	21.8122	22.7625	22.4234	23.8208	20.9584	22.467	22.0815	22.0284	21.3286	3	1	2	1	1	2	2	2	2	2	2	2	3	0	51.793
PPIA_MYCTU Peptidyl-prolyl cis-trans isomerase A OS=Mycobacterium tuberculosis (strain ATCC 25618 / H37Rv) GN=ppiA PE=1 SV=1;A0A0G2Q9G0_MYCBP Peptidyl-prolyl cis-trans isomerase OS=Mycobacterium bovis (strain BCG / Pasteur 1173P2) GN=ppiA_2 PE=3 SV=1	information pathways	Rv0009	P9WHW3	A0A0G2Q9G0	19.239	74.2	28.1058	27.3004	28.4354	26.573	27.8096	28.3309	27.2792	26.3378	27.6079	27.0135	28.4296	28.1149	10	8	9	10	9	7	9	8	7	9	6	8	8	0	323.31
TRPG_MYCTU Anthranilate synthase component 2 OS=Mycobacterium tuberculosis (strain ATCC 25618 / H37Rv) GN=trpG PE=1 SV=1;A0A0G2Q9G3_MYCBP Possible anthranilate synthase component II trpG OS=Mycobacterium bovis (strain BCG / Pasteur 1173P2) GN=trpG_2 PE=4 S	intermediary metabolism and respiration	Rv0013	P9WN35	A0A0G2Q9G3	24.627	35.8	21.628	20.1152	21.9979	22.3849	18.5208	22.6182	20.9212	21.3961	20.8096	21.6497	20.15	18.2412	3	2	1	2	2	1	3	2	2	2	2	2	1	0	11.54
SUGPH_MYCTU Acid phosphatase OS=Mycobacterium tuberculosis (strain ATCC 25618 / H37Rv) GN=gpm2 PE=1 SV=1;A0A0G2Q9H1_MYCBP Possible phosphoglycerate mutase gpm2 OS=Mycobacterium bovis (strain BCG / Pasteur 1173P2) GN=gpm2_1 PE=4 SV=1	intermediary metabolism and respiration	Rv3214	Q6MWZ7	A0A0G2Q9H1	21.949	55.7	21.6276	21.2547	23.1834	22.6447	21.4154	22.5071	20.8466	22.1081	21.624	22.0064	21.7045	21.5619	6	1	3	4	4	2	4	2	3	3	4	5	5	0	38.9
MENF_MYCTU Putative isochorismate synthase MenF OS=Mycobacterium tuberculosis (strain ATCC 25618 / H37Rv) GN=menF PE=1 SV=1;A0A0G2Q9H2_MYCBP Probable isochorismate synthase entC OS=Mycobacterium bovis (strain BCG / Pasteur 1173P2) GN=entC_1 PE=4 SV=1	intermediary metabolism and respiration	Rv3215	P9WFW9	A0A0G2Q9H2	38.937	39.8	21.606	23.5637	21.9017	23.0654	21.0053	22.7115	22.3483	21.8429	21.9045	22.0598	23.4437	18.7114	8	2	4	3	4	5	4	3	3	2	3	6	1	0	41.881
WHIB1_MYCTU Transcriptional regulator WhiB1 OS=Mycobacterium tuberculosis (strain ATCC 25618 / H37Rv) GN=whiB1 PE=1 SV=1;A0A0G2Q9H6_MYCBP Transcriptional regulator WhiB OS=Mycobacterium bovis (strain BCG / Pasteur 1173P2) GN=whiB1_1 PE=3 SV=1	Regulatory proteins	Rv3219	P9WF43	A0A0G2Q9H6	9.3185	28.6	19.0149	18.9254	21.0021	18.8667	20.7955	18.6625	18.8926	18.4777	19.4748	18.8183	22.5823	21.1948	1	1	1	1	0	1	0	0	0	0	0	1	1	0	12.142
RSHA_MYCTU Anti-sigma factor RshA OS=Mycobacterium tuberculosis (strain ATCC 25618 / H37Rv) GN=rshA PE=1 SV=1;A0A0G2Q9H9_MYCBP Possible anti-sigma factor OS=Mycobacterium bovis (strain BCG / Pasteur 1173P2) GN=BCG_3249c PE=4 SV=1	information pathways	Rv3221A	P9WJ69	A0A0G2Q9H9	11.29	16.8	17.2145	20.0084	17.0721	16.0122	20.7194	16.1684	21.2531	18.259	18.6132	19.0641	17.7292	19.4464	2	2	1	2	2	2	2	1	1	0	0	1	1	0	26.002
O05842_MYCTU Possible iron-regulated short-chain dehydrogenase/reductase OS=Mycobacterium tuberculosis (strain ATCC 25618 / H37Rv) GN=Rv3224 PE=1 SV=1;A0A0G2Q9I2_MYCBP Possible short-chain dehydrogenase/reductase OS=Mycobacterium bovis (strain BCG / Pasteu	intermediary metabolism and respiration	Rv3224	O05842	A0A0G2Q9I2	29.814	45.7	23.5916	23.2101	23.8527	22.4236	24.0756	23.6797	22.8172	22.3877	22.6374	22.4266	25.9031	24.3836	12	10	8	10	8	8	10	5	6	6	7	11	11	0	218.18
A0A0G2Q9I5_MYCBP Possible transferase OS=Mycobacterium bovis (strain BCG / Pasteur 1173P2) GN=BCG_3255c PE=4 SV=1;O05841_MYCTU GCN5-related N-acetyltransferase, phosphorylase OS=Mycobacterium tuberculosis (strain ATCC 25618 / H37Rv) GN=Rv3225c PE=1 SV=2	intermediary metabolism and respiration	Rv3225c	A0A0G2Q9I5	O05841	51.301	16.9	22.5661	20.5776	23.1296	22.3984	22.4011	21.2897	20.8688	21.6141	21.3719	20.5516	22.2042	21.9505	6	2	2	2	3	5	4	2	2	2	2	2	2	0	41.002
AROA_MYCTU 3-phosphoshikimate 1-carboxyvinyltransferase OS=Mycobacterium tuberculosis (strain ATCC 25618 / H37Rv) GN=aroA PE=1 SV=1;A0A0G2Q9I7_MYCBP 3-phosphoshikimate 1-carboxyvinyltransferase OS=Mycobacterium bovis (strain BCG / Pasteur 1173P2) GN=aroA_1	intermediary metabolism and respiration	Rv3227	P9WPY5	A0A0G2Q9I7	46.425	32	19.443	19.9034	19.1299	22.3329	17.9459	20.7669	19.6326	21.5885	19.0243	20.5592	21.0591	18.593	10	1	4	4	8	3	7	0	6	0	6	6	3	0	32.162
A0A0G2Q9J0_MYCBP Probable transcriptional regulatory protein (Probably asnC-family) OS=Mycobacterium bovis (strain BCG / Pasteur 1173P2) GN=BCG_3320c PE=4 SV=1;I6YBQ3_MYCTU AsnC family transcriptional regulator OS=Mycobacterium tuberculosis (strain ATCC 25	Regulatory proteins	Rv3291c	A0A0G2Q9J0	I6YBQ3	16.538	40.7	22.9866	23.5819	24.2647	23.6834	16.5188	24.4866	24.5158	23.3174	24.1099	23.4473	22.6392	18.95	4	1	2	2	2	3	2	2	2	1	2	1	0	0	48.183
P96900_MYCTU Probable transcriptional regulatory protein (Probably TetR-family) OS=Mycobacterium tuberculosis (strain ATCC 25618 / H37Rv) GN=Rv3295 PE=1 SV=1;A0A0G2Q9J4_MYCBP Probable transcriptional regulatory protein (Probably tetR-family) OS=Mycobacteri	Regulatory proteins	Rv3295	P96900	A0A0G2Q9J4	24.805	48.4	19.7511	19.4629	19.1005	20.6437	19.6369	21.2797	19.1523	20.3266	18.9455	19.7919	20.6513	20.1526	9	2	3	4	4	6	5	0	4	2	3	2	4	0	18.451
P96903_MYCTU Esterase OS=Mycobacterium tuberculosis (strain ATCC 25618 / H37Rv) GN=lpqC PE=1 SV=1;A0A0G2Q9J7_MYCBP Possible esterase lipoprotein lpqC OS=Mycobacterium bovis (strain BCG / Pasteur 1173P2) GN=lpqC_1 PE=4 SV=1	cell wall and cell processes	Rv3298c	P96903	A0A0G2Q9J7	31.368	26.6	23.0983	22.7475	23.072	23.1792	19.3728	24.8218	23.053	23.0546	22.5665	22.6822	22.5214	20.5359	6	3	4	5	5	2	6	3	3	4	4	4	4	0	115.27
O65931_MYCTU Probable arylsulfatase AtsB (Aryl-sulfate sulphohydrolase) (Sulfatase) OS=Mycobacterium tuberculosis (strain ATCC 25618 / H37Rv) GN=atsB PE=1 SV=3;A0A0G2Q9J8_MYCBP PRobable arylsulfatase atsB OS=Mycobacterium bovis (strain BCG / Pasteur 1173P2	intermediary metabolism and respiration	Rv3299c	O65931	A0A0G2Q9J8	105.68	12.4	19.4147	19.318	20.1391	20.8837	17.6435	20.1284	20.3673	18.6024	18.4655	18.1197	18.0045	18.0523	7	3	2	4	5	2	4	0	3	2	0	1	0	0	34.099
GLPD2_MYCTU Glycerol-3-phosphate dehydrogenase 2 OS=Mycobacterium tuberculosis (strain ATCC 25618 / H37Rv) GN=glpD2 PE=1 SV=1;A0A0G2Q9K1_MYCBP Glycerol-3-phosphate dehydrogenase OS=Mycobacterium bovis (strain BCG / Pasteur 1173P2) GN=glpD2_1 PE=3 SV=1	intermediary metabolism and respiration	Rv3302c	P9WN79	A0A0G2Q9K1	62.777	36.2	26.7045	25.7849	27.1581	26.6648	23.6266	26.0094	26.2915	25.3778	26.3375	25.4016	25.5283	25.3953	15	5	4	8	9	7	6	1	5	5	4	8	7	0	158.87
BTB7_MYCTU Biotinylated protein TB7.3 OS=Mycobacterium tuberculosis (strain ATCC 25618 / H37Rv) GN=Rv3221c PE=1 SV=1;A0A0G2Q9K9_MYCBP Biotinylated protein TB7.3 OS=Mycobacterium bovis (strain BCG / Pasteur 1173P2) GN=TB7.3_2 PE=4 SV=1	lipid metabolism	Rv3221c	P9WPQ1	A0A0G2Q9K9	7.3064	54.9	24.9217	25.7786	25.042	20.6011	22.0363	22.5649	25.6656	22.5988	24.0254	20.9046	27.1793	26.3391	2	1	1	1	1	1	1	1	1	1	1	1	2	0	77.919
SIGH_MYCTU ECF RNA polymerase sigma factor SigH OS=Mycobacterium tuberculosis (strain ATCC 25618 / H37Rv) GN=sigH PE=1 SV=1;A0A0G2Q9L2_MYCBP RNA polymerase sigma factor OS=Mycobacterium bovis (strain BCG / Pasteur 1173P2) GN=sigH_2 PE=3 SV=1	information pathways	Rv3223c	P9WGH9	A0A0G2Q9L2	24.225	74.1	23.9495	25.4261	23.9855	23.2931	27.0555	24.6147	23.7071	23.111	23.8908	23.4253	26.4953	25.82	10	8	7	9	5	10	9	7	4	9	4	8	10	0	169.4
O05872_MYCTU Bacteriophage protein OS=Mycobacterium tuberculosis (strain ATCC 25618 / H37Rv) GN=Rv3226c PE=1 SV=1;A0A0G2Q9L7_MYCBP Uncharacterized protein OS=Mycobacterium bovis (strain BCG / Pasteur 1173P2) GN=BCG_3256c PE=4 SV=1	Conserved hypotheticals	Rv3226c	O05872	A0A0G2Q9L7	27.64	50.4	23.9861	21.8204	23.3178	22.9354	21.7258	23.3384	21.9526	22.8949	22.8896	21.6484	21.5241	22.0594	11	5	3	5	4	10	4	3	3	3	3	4	3	0	69.984
Y3292_MYCTU Uncharacterized protein Rv3292 OS=Mycobacterium tuberculosis (strain ATCC 25618 / H37Rv) GN=Rv3292 PE=1 SV=1;A0A0G2Q9M2_MYCBP Uncharacterized protein OS=Mycobacterium bovis (strain BCG / Pasteur 1173P2) GN=BCG_3321 PE=4 SV=1	Conserved hypotheticals	Rv3292	P9WL01	A0A0G2Q9M2	45.331	49.2	22.3694	23.4992	22.49	22.7388	22.6756	23.7631	24.0379	21.6928	21.1608	23.0628	24.934	22.9321	16	6	6	9	6	13	7	2	5	3	4	11	9	0	205.46
A0A0G2Q9N7_MYCBP Thioredoxin reductase OS=Mycobacterium bovis (strain BCG / Pasteur 1173P2) GN=trxB2_1 PE=3 SV=1;TRXB_MYCTU Thioredoxin reductase OS=Mycobacterium tuberculosis (strain ATCC 25618 / H37Rv) GN=trxB PE=1 SV=1	intermediary metabolism and respiration	Rv3913	A0A0G2Q9N7	P9WHH1	35.585	50.1	22.5474	22.8411	22.9911	23.6677	22.8865	22.7208	23.6057	23.3346	23.231	23.7222	22.9149	22.5956	10	8	4	9	6	8	7	2	4	3	3	8	8	0	57.868
THIO_MYCTU Thioredoxin OS=Mycobacterium tuberculosis (strain ATCC 25618 / H37Rv) GN=trxA PE=1 SV=1;A0A0G2Q9N8_MYCBP Thioredoxin OS=Mycobacterium bovis (strain BCG / Pasteur 1173P2) GN=trxC_1 PE=3 SV=1	intermediary metabolism and respiration	Rv3914	P9WG67	A0A0G2Q9N8	12.544	79.3	30.6413	29.3033	30.3534	29.1353	32.6087	30.0892	29.5647	29.18	31.4071	28.4445	28.1579	26.972	9	7	5	7	6	6	7	5	6	4	4	5	6	0	126.05
P71599_MYCTU Uncharacterized protein OS=Mycobacterium tuberculosis (strain ATCC 25618 / H37Rv) GN=Rv0029 PE=1 SV=2;A0A0H3M0I9_MYCBP Uncharacterized protein OS=Mycobacterium bovis (strain BCG / Pasteur 1173P2) GN=BCG_0060 PE=4 SV=1	Conserved hypotheticals	Rv0029	P71599	A0A0H3M0I9	39.591	18.1	20.2036	18.4827	20.0289	20.4942	17.6645	20.608	18.1331	19.5599	18.1548	19.6612	18.7016	18.6206	4	2	2	2	2	2	2	2	1	1	1	1	1	0	12.218
A0A0H3M0K1_MYCBP Myo-inositol-1-phosphate synthase INO1 OS=Mycobacterium bovis (strain BCG / Pasteur 1173P2) GN=ino1 PE=4 SV=1;INO1_MYCTU Inositol-3-phosphate synthase OS=Mycobacterium tuberculosis (strain ATCC 25618 / H37Rv) GN=ino1 PE=1 SV=1	intermediary metabolism and respiration	Rv0046c	A0A0H3M0K1	P9WKI1	39.982	78.2	24.8443	22.9925	24.2159	24.0416	25.2402	23.553	23.161	24.7068	22.4661	18.2191	25.1736	25.0766	18	15	7	14	10	15	14	9	7	6	2	13	11	0	139.86
A0A0H3M0L5_MYCBP Uncharacterized protein OS=Mycobacterium bovis (strain BCG / Pasteur 1173P2) GN=BCG_0095A PE=4 SV=1;VAPB1_MYCTU Putative antitoxin VapB1 OS=Mycobacterium tuberculosis (strain ATCC 25618 / H37Rv) GN=vapB1 PE=4 SV=1	virulence, detoxification and adaptation	Rv0064A	A0A0H3M0L5	P0CW29	8.7458	57	18.2747	26.4964	17.4184	21.595	23.6373	24.9197	27.3741	24.79	26.1598	25.0414	25.4032	22.1133	3	1	1	1	2	3	1	2	2	1	2	1	2	0	68.929
SDHL_MYCTU L-serine dehydratase OS=Mycobacterium tuberculosis (strain ATCC 25618 / H37Rv) GN=sdaA PE=1 SV=1;A0A0H3M0L9_MYCBP Probable l-serine dehydratase sdaA OS=Mycobacterium bovis (strain BCG / Pasteur 1173P2) GN=sdaA PE=4 SV=1	intermediary metabolism and respiration	Rv0069c	P9WGT5	A0A0H3M0L9	48.576	28	26.1038	25.0354	26.0149	24.7423	18.0096	24.02	18.9556	25.1896	25.4371	19.7114	22.9088	23.6667	6	3	2	3	5	2	4	1	3	2	0	4	2	0	12.263
L7N686_MYCTU Uncharacterized protein OS=Mycobacterium tuberculosis (strain ATCC 25618 / H37Rv) GN=Rv0078A PE=1 SV=1;A0A0H3M0M7_MYCBP Uncharacterized protein OS=Mycobacterium bovis (strain BCG / Pasteur 1173P2) GN=BCG_0110c PE=4 SV=1	Conserved hypotheticals	Rv0078A	L7N686	A0A0H3M0M7	21.612	31.5	20.2426	19.1104	18.7768	18.1044	19.8723	20.6834	20.466	20.3968	20.2465	19.2092	21.5861	20.3727	5	2	2	2	2	4	3	1	2	1	2	3	3	0	12.674
Y097_MYCTU Putative dioxygenase Rv0097 OS=Mycobacterium tuberculosis (strain ATCC 25618 / H37Rv) GN=Rv0097 PE=1 SV=1;A0A0H3M0N8_MYCBP Possible oxidoreductase OS=Mycobacterium bovis (strain BCG / Pasteur 1173P2) GN=BCG_0130 PE=4 SV=1	intermediary metabolism and respiration	Rv0097	P9WG83	A0A0H3M0N8	32.641	40.1	18.7106	18.9788	18.1955	19.5132	21.1548	18.7838	20.2742	19.4355	18.9679	18.0329	18.3022	18.9459	7	1	0	2	2	5	1	0	2	0	0	3	3	0	54.208
A0A0H3M0P5_MYCBP Probable cation-transporter atpase I ctpI OS=Mycobacterium bovis (strain BCG / Pasteur 1173P2) GN=ctpI PE=4 SV=1;CTPI_MYCTU Probable cation-transporting ATPase I OS=Mycobacterium tuberculosis (strain ATCC 25618 / H37Rv) GN=ctpI PE=1 SV=1	cell wall and cell processes	Rv0107c	A0A0H3M0P5	P9WPS5	167.86	12.5	18.7941	19.512	19.9385	21.6551	18.1831	20.3536	19.6814	19.7567	19.0167	17.9913	20.4295	19.1756	13	0	1	3	9	6	5	0	4	0	2	4	2	0	40.676
O07173_MYCTU DNA-binding protein OS=Mycobacterium tuberculosis (strain ATCC 25618 / H37Rv) GN=Rv0123 PE=1 SV=1;A0A0H3M0R1_MYCBP Uncharacterized protein OS=Mycobacterium bovis (strain BCG / Pasteur 1173P2) GN=BCG_0157 PE=4 SV=1	Conserved hypotheticals	Rv0123	O07173	A0A0H3M0R1	13.623	63.9	20.2937	19.3189	19.4859	20.9492	20.454	21.0055	20.079	20.8817	19.0481	19.782	22.3011	19.8634	6	3	1	3	2	6	1	1	2	1	1	3	2	0	53.184
A85C_MYCTU Diacylglycerol acyltransferase/mycolyltransferase Ag85C OS=Mycobacterium tuberculosis (strain ATCC 25618 / H37Rv) GN=fbpC PE=1 SV=1;A0A0H3M0R3_MYCBP Secreted antigen 85-c fbpC (85C) OS=Mycobacterium bovis (strain BCG / Pasteur 1173P2) GN=fbpC PE	lipid metabolism	Rv0129c	P9WQN9	A0A0H3M0R3	36.771	40.3	24.1092	24.6201	23.464	24.1424	24.2239	25.722	25.3735	24.5768	25.0698	25.3625	26.2948	24.1877	9	6	6	5	6	9	6	6	7	7	7	8	7	0	84.026
Y0148_MYCTU Putative short-chain type dehydrogenase/reductase Rv0148 OS=Mycobacterium tuberculosis (strain ATCC 25618 / H37Rv) GN=Rv0148 PE=1 SV=3;A0A0H3M0S5_MYCBP Probable short-chain type dehydrogenase/reductase OS=Mycobacterium bovis (strain BCG / Paste	intermediary metabolism and respiration	Rv0148	P96825	A0A0H3M0S5	29.778	88.5	27.0811	27.3689	26.7408	27.5045	26.0079	27.681	27.541	27.4929	27.1263	27.4622	27.5953	27.2515	15	10	10	13	10	13	12	10	9	10	8	13	13	0	314.81
I6WXK4_MYCTU Phosphotyrosine protein phosphatase OS=Mycobacterium tuberculosis (strain ATCC 25618 / H37Rv) GN=ptbB PE=1 SV=1;A0A0H3M0T0_MYCBP Phosphotyrosine protein phosphatase ptpB OS=Mycobacterium bovis (strain BCG / Pasteur 1173P2) GN=ptbB PE=4 SV=1	Regulatory proteins	Rv0153c	I6WXK4	A0A0H3M0T0	30.153	42.8	22.0855	19.7288	21.6218	19.5312	22.7794	18.5647	20.6455	17.8171	19.531	18.7462	22.1491	21.7742	10	3	1	3	3	6	2	1	4	1	3	4	4	0	24.936
O53641_MYCTU Probable transcriptional regulatory protein (Possibly TetR-family) OS=Mycobacterium tuberculosis (strain ATCC 25618 / H37Rv) GN=Rv0158 PE=1 SV=1;A0A0H3M0T4_MYCBP Probable transcriptional regulatory protein (Possibly tetR-family) OS=Mycobacteri	Regulatory proteins	Rv0158	O53641	A0A0H3M0T4	24.128	14.5	18.9807	18.9776	18.1334	20.3663	19.2096	19.3894	19.6954	20.1277	18.6088	18.7655	17.0952	19.2388	3	1	1	2	2	1	1	1	2	1	2	3	1	0	7.6462
O07417_MYCTU Possible Mce-family lipoprotein LprK (Mce-family lipoprotein Mce1E) OS=Mycobacterium tuberculosis (strain ATCC 25618 / H37Rv) GN=lprK PE=1 SV=1;A0A0H3M0U8_MYCBP Possible mce-family lipoprotein lprK (MCE-family lipoprotein mce1E) OS=Mycobacteri	cell wall and cell processes	Rv0173	O07417	A0A0H3M0U8	42.239	62.6	23.6957	24.4142	24.1863	23.8847	23.6761	25.2712	24.1351	23.3572	24.8394	23.4869	23.9645	23.131	15	5	4	10	7	13	8	3	6	4	5	8	7	0	146.5
O07422_MYCTU Mammalian cell entry protein OS=Mycobacterium tuberculosis (strain ATCC 25618 / H37Rv) GN=Rv0178 PE=1 SV=1;A0A0H3M0V2_MYCBP Probable conserved MCE associated membrane protein OS=Mycobacterium bovis (strain BCG / Pasteur 1173P2) GN=BCG_0215 PE=	cell wall and cell processes	Rv0178	O07422	A0A0H3M0V2	25.911	38.1	18.8342	19.1201	15.5895	14.8298	19.7438	18.1428	18.3194	19.373	18.8737	19.7488	13.9437	19.0939	7	0	0	4	2	7	0	0	1	0	0	2	1	0	182.04
MGLL_MYCTU Monoacylglycerol lipase OS=Mycobacterium tuberculosis (strain ATCC 25618 / H37Rv) GN=Rv0183 PE=1 SV=2;A0A0H3M0V8_MYCBP Possible lysophospholipase OS=Mycobacterium bovis (strain BCG / Pasteur 1173P2) GN=BCG_0220 PE=4 SV=1	intermediary metabolism and respiration	Rv0183	O07427	A0A0H3M0V8	30.261	66.7	24.656	25.8316	24.8313	25.6729	25.2525	26.2709	26.3549	26.0641	25.5671	25.7001	26.4895	24.6443	13	10	7	10	9	9	9	5	6	6	5	10	11	0	286.08
O53650_MYCTU Membrane protein OS=Mycobacterium tuberculosis (strain ATCC 25618 / H37Rv) GN=Rv0199 PE=1 SV=1;A0A0H3M0X2_MYCBP Probable conserved membrane protein OS=Mycobacterium bovis (strain BCG / Pasteur 1173P2) GN=BCG_0236 PE=4 SV=1	cell wall and cell processes	Rv0199	O53650	A0A0H3M0X2	23.52	29.7	19.4479	18.0585	18.2051	20.2998	17.5674	19.5703	20.117	19.7036	18.6197	18.9738	19.0013	18.1457	4	0	1	3	3	2	2	0	3	0	2	1	1	0	59.373
I6Y340_MYCTU Acyl dehydratase OS=Mycobacterium tuberculosis (strain ATCC 25618 / H37Rv) GN=Rv0216 PE=1 SV=1;A0A0H3M0Z1_MYCBP Uncharacterized protein OS=Mycobacterium bovis (strain BCG / Pasteur 1173P2) GN=BCG_0253 PE=4 SV=1	intermediary metabolism and respiration	Rv0216	I6Y340	A0A0H3M0Z1	35.788	48.4	25.6152	25.5489	25.6495	26.3569	24.7742	25.9148	24.2066	25.9356	25.1185	25.9376	24.7868	25.7499	11	5	4	9	9	7	7	4	7	7	6	7	7	0	159.72
P96409_MYCTU Probable conserved membrane protein OS=Mycobacterium tuberculosis (strain ATCC 25618 / H37Rv) GN=Rv0227c PE=1 SV=1;A0A0H3M102_MYCBP Probable conserved membrane protein OS=Mycobacterium bovis (strain BCG / Pasteur 1173P2) GN=BCG_0264c PE=4 SV=1	cell wall and cell processes	Rv0227c	P96409	A0A0H3M102	45.527	37.3	20.1052	19.007	20.4174	21.5751	22.1152	20.4578	19.5605	20.8355	20.6187	18.9446	20.7282	20.9394	11	6	0	8	5	9	5	1	3	2	1	8	3	0	34.991
O86361_MYCTU Acetyl-CoA acetyltransferase OS=Mycobacterium tuberculosis (strain ATCC 25618 / H37Rv) GN=fadA2 PE=1 SV=1;A0A0H3M116_MYCBP Probable acetyl-CoA acyltransferase fadA2 OS=Mycobacterium bovis (strain BCG / Pasteur 1173P2) GN=fadA2 PE=3 SV=1	lipid metabolism	Rv0243	O86361	A0A0H3M116	46.107	62.3	25.1497	24.4516	25.3836	26.7703	25.4807	25.413	24.0448	26.6134	24.6087	26.3038	25.4859	25.5114	18	13	7	14	9	14	14	3	3	6	4	14	10	0	255.84
O53670_MYCTU Probable succinate dehydrogenase [iron-sulfur subunit] (Succinic dehydrogenase) OS=Mycobacterium tuberculosis (strain ATCC 25618 / H37Rv) GN=sdhA PE=1 SV=1;A0A0H3M121_MYCBP Probable succinate dehydrogenase [iron-sulfur subunit] OS=Mycobacteriu	intermediary metabolism and respiration	Rv0248c	O53670	A0A0H3M121	70.68	59.6	25.9373	27.1848	27.0293	27.6103	24.9919	27.1855	26.6636	27.4794	26.8292	27.1547	27.3595	26.6248	29	22	19	26	20	22	21	14	17	19	13	26	20	0	323.31
O53697_MYCTU Conserved protein OS=Mycobacterium tuberculosis (strain ATCC 25618 / H37Rv) GN=Rv0293c PE=1 SV=1;A0A0H3M167_MYCBP Uncharacterized protein OS=Mycobacterium bovis (strain BCG / Pasteur 1173P2) GN=BCG_0333c PE=4 SV=1	Conserved hypotheticals	Rv0293c	O53697	A0A0H3M167	43.97	9.2	17.1645	19.2343	19.331	19.6058	17.7494	19.0027	19.4539	17.9808	19.1001	20.0617	19.3154	19.837	2	0	0	2	2	0	1	0	0	1	0	1	0	0	8.8967
I6XU97_MYCTU Hydrolase OS=Mycobacterium tuberculosis (strain ATCC 25618 / H37Rv) GN=Rv0045c PE=1 SV=1;A0A0H3M168_MYCBP Possible hydrolase OS=Mycobacterium bovis (strain BCG / Pasteur 1173P2) GN=BCG_0076c PE=4 SV=1	lipid metabolism	Rv0045c	I6XU97	A0A0H3M168	32.131	58.7	22.6877	19.8474	23.3512	22.412	23.511	23.5166	21.0904	23.1644	23.4977	22.6834	22.4818	23.0919	10	3	2	5	7	8	2	2	2	3	3	6	3	0	54.467
O07236_MYCTU Possible conserved exported protein OS=Mycobacterium tuberculosis (strain ATCC 25618 / H37Rv) GN=Rv0309 PE=1 SV=1;A0A0H3M181_MYCBP Possible conserved exported protein OS=Mycobacterium bovis (strain BCG / Pasteur 1173P2) GN=BCG_0349 PE=4 SV=1	cell wall and cell processes	Rv0309	O07236	A0A0H3M181	22.529	9.6	21.0445	19.2054	18.2916	20.291	15.6237	21.972	18.5719	18.6126	17.8232	18.6511	19.5439	18.5065	2	1	1	1	1	2	1	1	1	1	1	1	0	0	5.9389
A0A0H3M195_MYCBP Probable transcriptional regulatory protein OS=Mycobacterium bovis (strain BCG / Pasteur 1173P2) GN=BCG_0109 PE=4 SV=1;O53623_MYCTU Probable transcriptional regulatory protein OS=Mycobacterium tuberculosis (strain ATCC 25618 / H37Rv) GN=Rv	Regulatory proteins	Rv0078	A0A0H3M195	O53623	21.91	31.3	24.1382	21.1836	23.7355	22.6395	17.5234	23.2908	21.4167	21.9936	23.1323	22.0835	20.9065	18.8323	3	2	1	1	2	1	1	1	1	2	1	1	2	0	104.91
Y0081_MYCTU Uncharacterized HTH-type transcriptional regulator Rv0081 OS=Mycobacterium tuberculosis (strain ATCC 25618 / H37Rv) GN=Rv0081 PE=1 SV=1;A0A0H3M199_MYCBP Probable transcriptional regulatory protein OS=Mycobacterium bovis (strain BCG / Pasteur 11	Regulatory proteins	Rv0081	P9WMI7	A0A0H3M199	12.356	28.9	18.8509	22.9324	17.782	18.0411	22.1554	18.0748	22.9173	19.3936	20.4806	22.1681	22.9338	20.9073	2	0	1	0	0	2	1	1	1	0	1	2	2	0	64.513
O07256_MYCTU Conserved protein OS=Mycobacterium tuberculosis (strain ATCC 25618 / H37Rv) GN=Rv0332 PE=1 SV=1;A0A0H3M1A0_MYCBP Uncharacterized protein OS=Mycobacterium bovis (strain BCG / Pasteur 1173P2) GN=BCG_0371 PE=4 SV=1	Conserved hypotheticals	Rv0332	O07256	A0A0H3M1A0	28.62	39.5	22.4114	22.9342	21.7471	23.2182	21.7952	23.7975	24.0414	22.7545	22.7526	23.3492	22.8354	18.9355	8	3	4	7	7	8	6	3	7	3	5	8	1	0	138.57
A0A0H3M1A4_MYCBP Putative iron-sulfur-binding reductase OS=Mycobacterium bovis (strain BCG / Pasteur 1173P2) GN=BCG_0377c PE=4 SV=1;O33268_MYCTU FeS-binding protein OS=Mycobacterium tuberculosis (strain ATCC 25618 / H37Rv) GN=Rv0338c PE=1 SV=1	intermediary metabolism and respiration	Rv0338c	A0A0H3M1A4	O33268	95.414	16.6	22.6075	22.6558	22.7683	22.8313	21.2376	23.8336	22.0945	21.3707	21.7888	20.6097	21.8848	21.5041	11	3	6	5	6	8	6	2	4	4	2	6	4	0	126.13
O06299_MYCTU Possible transcriptional regulatory protein OS=Mycobacterium tuberculosis (strain ATCC 25618 / H37Rv) GN=Rv0348 PE=1 SV=1;A0A0H3M1B5_MYCBP Possible transcriptional regulatory protein OS=Mycobacterium bovis (strain BCG / Pasteur 1173P2) GN=BCG_	Regulatory proteins	Rv0348	O06299	A0A0H3M1B5	24.251	57.6	18.302	20.2768	21.4345	19.9552	21.3883	22.5899	19.982	19.6844	18.6751	19.6023	22.6776	18.0849	7	1	2	3	4	4	4	2	3	1	1	3	1	0	80.807
O06307_MYCTU Conserved protein OS=Mycobacterium tuberculosis (strain ATCC 25618 / H37Rv) GN=Rv0356c PE=1 SV=1;A0A0H3M1C0_MYCBP Uncharacterized protein OS=Mycobacterium bovis (strain BCG / Pasteur 1173P2) GN=BCG_0394c PE=4 SV=1	Conserved hypotheticals	Rv0356c	O06307	A0A0H3M1C0	22.911	36	24.3795	22.3447	24.018	24.5265	22.4769	25.4268	22.3588	24.3097	23.3133	22.8405	24.0489	23.3164	5	4	2	3	3	4	3	2	2	2	2	3	4	0	28.383
P95202_MYCTU Possible secreted protein OS=Mycobacterium tuberculosis (strain ATCC 25618 / H37Rv) GN=Rv0394c PE=1 SV=1;A0A0H3M1F4_MYCBP Possible secreted protein OS=Mycobacterium bovis (strain BCG / Pasteur 1173P2) GN=BCG_0431c PE=4 SV=1	cell wall and cell processes	Rv0394c	P95202	A0A0H3M1F4	25.278	40.6	20.1235	18.6179	20.7044	18.9539	20.9346	19.6739	19.8351	18.4054	19.4117	19.8877	21.9844	21.4963	7	3	1	3	0	6	2	1	0	1	0	4	3	0	63.402
P96824_MYCTU Aldehyde dehydrogenase OS=Mycobacterium tuberculosis (strain ATCC 25618 / H37Rv) GN=Rv0147 PE=1 SV=1;A0A0H3M1F9_MYCBP Aldehyde dehydrogenase OS=Mycobacterium bovis (strain BCG / Pasteur 1173P2) GN=BCG_0183 PE=3 SV=1	intermediary metabolism and respiration	Rv0147	P96824	A0A0H3M1F9	55.034	33.2	21.1602	22.1517	21.4629	23.7335	18.9448	23.3873	20.1073	22.0626	21.9732	21.4827	22.8404	20.6902	11	6	9	7	6	8	7	4	6	3	6	8	4	0	86.676
FGD_MYCTU F420-dependent glucose-6-phosphate dehydrogenase OS=Mycobacterium tuberculosis (strain ATCC 25618 / H37Rv) GN=fgd1 PE=1 SV=1;A0A0H3M1G9_MYCBP F420-dependent glucose-6-phosphate dehydrogenase OS=Mycobacterium bovis (strain BCG / Pasteur 1173P2) GN	intermediary metabolism and respiration	Rv0407	P9WNE1	A0A0H3M1G9	36.988	68.8	25.0653	24.7336	24.5496	25.7432	25.3355	26.1983	24.875	25.2888	24.7889	25.6183	25.3271	24.6378	16	9	7	11	7	13	11	5	7	9	7	9	9	0	229.62
P96834_MYCTU NAD(P) transhydrogenase subunit beta OS=Mycobacterium tuberculosis (strain ATCC 25618 / H37Rv) GN=pntB PE=1 SV=1;A0A0H3M1H2_MYCBP NAD(P) transhydrogenase subunit beta OS=Mycobacterium bovis (strain BCG / Pasteur 1173P2) GN=pntB PE=3 SV=1	intermediary metabolism and respiration	Rv0157	P96834	A0A0H3M1H2	48.858	29.3	21.7784	20.3222	22.8966	23.2676	23.6204	22.3192	22.6181	22.8336	22.9148	19.4539	21.813	22.9671	8	4	3	6	5	6	5	1	5	2	1	7	6	0	49.441
O07416_MYCTU Mammalian cell entry protein OS=Mycobacterium tuberculosis (strain ATCC 25618 / H37Rv) GN=mce1D PE=1 SV=1;A0A0H3M1I8_MYCBP MCE-family protein mce1D OS=Mycobacterium bovis (strain BCG / Pasteur 1173P2) GN=mce1D PE=4 SV=1	virulence, detoxification and adaptation	Rv0172	O07416	A0A0H3M1I8	56.516	40	24.1831	25.9778	24.5642	25.3052	22.7607	26.201	26.5569	24.7009	25.7694	25.2329	24.7096	22.6346	15	7	6	10	7	11	9	4	6	5	6	7	5	0	223.08
A0A0H3M1J1_MYCBP Putative tuberculin related peptide OS=Mycobacterium bovis (strain BCG / Pasteur 1173P2) GN=BCG_0470 PE=4 SV=1;P96277_MYCTU Putative tuberculin related peptide OS=Mycobacterium tuberculosis (strain ATCC 25618 / H37Rv) GN=Rv0431 PE=1 SV=2	cell wall and cell processes	Rv0431	A0A0H3M1J1	P96277	16.865	42.7	21.9795	20.9356	22.0843	21.0818	26.0118	21.0322	23.5208	22.8474	21.0096	22.5488	22.3029	22.9206	4	3	3	3	2	4	3	2	3	3	2	4	4	0	45.439
MOEA2_MYCTU Molybdopterin molybdenumtransferase 2 OS=Mycobacterium tuberculosis (strain ATCC 25618 / H37Rv) GN=moaE2 PE=1 SV=1;A0A0H3M1J6_MYCBP Probable molybdopterin biosynthesis protein moeA2 OS=Mycobacterium bovis (strain BCG / Pasteur 1173P2) GN=moeA2	intermediary metabolism and respiration	Rv0438c	P9WJQ5	A0A0H3M1J6	42.021	18.5	19.445	18.9834	18.7351	19.8494	18.2566	21.6571	18.7933	18.9213	18.7481	19.2582	19.8982	18.8788	3	1	1	1	3	0	2	1	1	1	2	2	1	0	18.268
SIGG_MYCTU ECF RNA polymerase sigma factor SigG OS=Mycobacterium tuberculosis (strain ATCC 25618 / H37Rv) GN=sigG PE=1 SV=1;A0A0H3M1J7_MYCBP RNA polymerase sigma factor OS=Mycobacterium bovis (strain BCG / Pasteur 1173P2) GN=sigG PE=3 SV=1	information pathways	Rv0182c	P9WGG5	A0A0H3M1J7	40.982	11.1	19.7197	18.0567	18.891	19.6239	17.2343	19.6604	20.6282	20.0281	18.116	19.4198	19.4265	18.7754	3	1	1	1	1	3	1	0	1	1	1	0	0	0	7.7826
O07431_MYCTU Probable O-methyltransferase OS=Mycobacterium tuberculosis (strain ATCC 25618 / H37Rv) GN=Rv0187 PE=1 SV=1;A0A0H3M1K2_MYCBP Probable o-methyltransferase OS=Mycobacterium bovis (strain BCG / Pasteur 1173P2) GN=BCG_0224 PE=4 SV=1	intermediary metabolism and respiration	Rv0187	O07431	A0A0H3M1K2	23.097	24.5	22.8567	22.2162	18.269	22.954	20.5875	21.7605	19.0794	19.3828	22.9962	23.1426	18.2388	19.4145	4	2	2	2	2	2	2	1	2	2	2	1	1	0	52.372
A0A0H3M1K8_MYCBP Uncharacterized protein OS=Mycobacterium bovis (strain BCG / Pasteur 1173P2) GN=BCG_0229 PE=4 SV=1;LDT4_MYCTU L,D-transpeptidase 4 OS=Mycobacterium tuberculosis (strain ATCC 25618 / H37Rv) GN=Rv0192 PE=1 SV=1	Conserved hypotheticals	Rv0192	A0A0H3M1K8	O07436	36.567	48	23.7808	23.6954	23.9278	23.2704	24.8103	25.8209	24.3411	23.565	24.1216	24.2284	26.2799	23.8775	10	6	3	5	5	8	9	6	5	4	4	8	6	0	174.71
I6X8R2_MYCTU Peptidase M13 OS=Mycobacterium tuberculosis (strain ATCC 25618 / H37Rv) GN=zmp1 PE=1 SV=1;A0A0H3M1L3_MYCBP Probable zinc metalloprotease OS=Mycobacterium bovis (strain BCG / Pasteur 1173P2) GN=BCG_0235c PE=4 SV=1	intermediary metabolism and respiration	Rv0198c	I6X8R2	A0A0H3M1L3	73.913	33.9	23.5615	24.593	23.707	24.082	22.0702	24.4232	24.7511	23.6214	23.8512	23.1508	25.1011	24.2285	15	6	5	6	7	9	4	4	6	3	6	11	9	0	119.88
A0A0H3M1L8_MYCBP Possible exported protein OS=Mycobacterium bovis (strain BCG / Pasteur 1173P2) GN=BCG_0240 PE=4 SV=1;RV203_MYCTU Heme-binding protein Rv0203 OS=Mycobacterium tuberculosis (strain ATCC 25618 / H37Rv) GN=Rv0203 PE=1 SV=1	cell wall and cell processes	Rv0203	A0A0H3M1L8	I6X8R5	13.874	58.8	18.4251	18.7672	19.1331	22.2331	18.5102	25.2377	23.3869	22.699	18.0079	22.4779	19.0976	18.7101	3	0	1	1	2	2	2	2	2	1	1	2	0	0	23.415
A0A0H3M1M2_MYCBP Probable transcriptional regulatory protein OS=Mycobacterium bovis (strain BCG / Pasteur 1173P2) GN=BCG_0505c PE=4 SV=1;RAMB_MYCTU HTH-type transcriptional regulator RamB OS=Mycobacterium tuberculosis (strain ATCC 25618 / H37Rv) GN=ramB PE	Regulatory proteins	Rv0465c	A0A0H3M1M2	P9WMI1	53.125	18.8	21.6097	22.5681	22.3329	22.8944	17.6714	21.905	19.5341	18.289	18.1422	20.9369	21.6557	21.756	5	2	2	4	4	1	3	0	1	1	2	2	3	0	13.403
CMAS3_MYCTU Cyclopropane mycolic acid synthase 3 OS=Mycobacterium tuberculosis (strain ATCC 25618 / H37Rv) GN=pcaA PE=1 SV=1;A0A0H3M1M7_MYCBP Mycolic acid synthase pcaA OS=Mycobacterium bovis (strain BCG / Pasteur 1173P2) GN=pcaA PE=4 SV=1	lipid metabolism	Rv0470c	P9WPB3	A0A0H3M1M7	33.027	49.1	24.7489	24.6893	25.0847	26.1264	17.8816	25.1485	23.4341	25.3396	24.3541	24.3527	23.5581	23.1774	9	7	7	8	7	0	7	4	6	6	5	7	5	0	113.57
P96414_MYCTU Acyl-CoA dehydrogenase OS=Mycobacterium tuberculosis (strain ATCC 25618 / H37Rv) GN=fadE4 PE=1 SV=1;A0A0H3M1P1_MYCBP Probable acyl-CoA dehydrogenase fadE4 OS=Mycobacterium bovis (strain BCG / Pasteur 1173P2) GN=fadE4 PE=4 SV=1	lipid metabolism	Rv0231	P96414	A0A0H3M1P1	63.494	26.6	22.7071	23.8121	23.9378	24.1597	21.5893	23.8015	22.4643	23.2079	22.8887	22.2919	23.3581	20.7212	11	4	3	8	10	5	7	4	5	3	4	9	4	0	90.767
L7N6B0_MYCTU Beta-glucosidase OS=Mycobacterium tuberculosis (strain ATCC 25618 / H37Rv) GN=lpqI PE=1 SV=1;A0A0H3M1P5_MYCBP Probable conserved lipoprotein lpqI OS=Mycobacterium bovis (strain BCG / Pasteur 1173P2) GN=lpqI PE=4 SV=1	cell wall and cell processes	Rv0237	L7N6B0	A0A0H3M1P5	39.518	51	21.6433	23.5639	22.2086	23.1175	23.8105	24.8364	22.477	21.8905	19.5359	22.0311	24.4389	22.5419	13	9	3	11	6	11	8	3	3	1	3	10	10	0	102.09
I6Y778_MYCTU 3-ketoacyl-ACP reductase OS=Mycobacterium tuberculosis (strain ATCC 25618 / H37Rv) GN=fabG PE=1 SV=1;A0A0H3M1P9_MYCBP Probable 3-oxoacyl-[acyl-carrier protein] reductase fabG4 OS=Mycobacterium bovis (strain BCG / Pasteur 1173P2) GN=fabG4 PE=4	lipid metabolism	Rv0242c	I6Y778	A0A0H3M1P9	46.83	80.2	27.2676	27.2934	27.3785	27.9396	26.7943	28.7152	27.9555	27.7769	27.3454	28.0546	28.2393	26.6815	22	19	12	20	17	19	18	10	13	14	10	18	19	0	323.31
O53669_MYCTU Fumarate reductase OS=Mycobacterium tuberculosis (strain ATCC 25618 / H37Rv) GN=Rv0247c PE=1 SV=1;A0A0H3M1Q4_MYCBP Probable succinate dehydrogenase [iron-sulfur subunit] OS=Mycobacterium bovis (strain BCG / Pasteur 1173P2) GN=BCG_0285c PE=4 SV	intermediary metabolism and respiration	Rv0247c	O53669	A0A0H3M1Q4	28.626	46.8	21.5404	20.4868	21.2042	19.7683	25.1438	21.5978	20.722	19.5729	21.1153	19.4878	21.8173	22.8845	10	9	3	9	4	9	6	3	2	5	1	9	6	0	74
Y474_MYCTU Uncharacterized HTH-type transcriptional regulator Rv0474 OS=Mycobacterium tuberculosis (strain ATCC 25618 / H37Rv) GN=Rv0474 PE=1 SV=1;A0A0H3M1R0_MYCBP Probable transcriptional regulatory protein OS=Mycobacterium bovis (strain BCG / Pasteur 117	Regulatory proteins	Rv0474	P9WMH9	A0A0H3M1R0	15.364	55.7	22.8923	19.4192	22.2744	20.6581	24.2128	20.8088	22.124	20.926	21.878	18.9431	20.096	21.3593	6	5	1	3	2	5	3	2	1	2	1	2	2	0	37.405
Y481_MYCTU Uncharacterized protein Rv0481c OS=Mycobacterium tuberculosis (strain ATCC 25618 / H37Rv) GN=Rv0481c PE=1 SV=1;A0A0H3M1R4_MYCBP Uncharacterized protein OS=Mycobacterium bovis (strain BCG / Pasteur 1173P2) GN=BCG_0522c PE=4 SV=1	Conserved hypotheticals	Rv0481c	P9WKV5	A0A0H3M1R4	19.063	24.7	17.3096	17.9048	17.3044	18.7316	17.6984	18.4013	18.0648	18.7934	17.5362	18.7371	16.8715	18.1847	3	1	1	1	2	1	2	1	2	1	1	2	3	0	9.0912
O06392_MYCTU Possible thioredoxin protein (Thiol-disulfide interchange protein) OS=Mycobacterium tuberculosis (strain ATCC 25618 / H37Rv) GN=Rv0526 PE=1 SV=1;A0A0H3M1U2_MYCBP Possible thioredoxin protein OS=Mycobacterium bovis (strain BCG / Pasteur 1173P2)	intermediary metabolism and respiration	Rv0526	O06392	A0A0H3M1U2	23.218	53.7	20.1092	20.7776	21.5345	20.6731	20.9441	21.006	20.8239	20.2906	20.7654	19.2879	22.7836	20.1088	9	2	3	4	5	7	2	2	4	2	1	6	3	0	29.362
A0A0H3M1U5_MYCBP Uncharacterized protein OS=Mycobacterium bovis (strain BCG / Pasteur 1173P2) GN=BCG_0315A PE=4 SV=1;VPB25_MYCTU Antitoxin VapB25 OS=Mycobacterium tuberculosis (strain ATCC 25618 / H37Rv) GN=vapB25 PE=1 SV=1	virulence, detoxification and adaptation	Rv0277A	A0A0H3M1U5	P0CW33	9.1142	75.3	20.9937	21.4813	21.2367	18.2443	21.6746	20.3712	21.5484	19.4904	19.8685	19.2604	18.6152	22.0286	5	3	3	3	0	5	3	3	0	1	0	1	3	0	56.706
O06403_MYCTU Membrane protein OS=Mycobacterium tuberculosis (strain ATCC 25618 / H37Rv) GN=Rv0537c PE=1 SV=1;A0A0H3M1U6_MYCBP Probable integral membrane protein OS=Mycobacterium bovis (strain BCG / Pasteur 1173P2) GN=BCG_0581c PE=4 SV=1	cell wall and cell processes	Rv0537c	O06403	A0A0H3M1U6	50.202	12.2	24.2792	18.5638	25.8209	23.6279	17.79	23.0254	20.1123	22.7509	23.5714	22.206	19.4002	22.7712	2	2	1	2	2	0	2	0	2	2	2	0	1	0	20.754
O06413_MYCTU Possible oxidoreductase OS=Mycobacterium tuberculosis (strain ATCC 25618 / H37Rv) GN=Rv0547c PE=1 SV=1;A0A0H3M1V2_MYCBP Possible oxidoreductase OS=Mycobacterium bovis (strain BCG / Pasteur 1173P2) GN=BCG_0591c PE=3 SV=1	intermediary metabolism and respiration	Rv0547c	O06413	A0A0H3M1V2	31.867	45.2	24.4049	25.0116	23.0805	23.1048	17.0913	22.4629	19.4196	23.0009	23.9924	23.7551	22.7739	18.7011	7	4	2	3	4	2	4	1	3	4	2	4	1	0	44.385
A0A0H3M1V4_MYCBP Uncharacterized protein OS=Mycobacterium bovis (strain BCG / Pasteur 1173P2) GN=BCG_0597 PE=4 SV=1;O06418_MYCTU Amidohydrolase OS=Mycobacterium tuberculosis (strain ATCC 25618 / H37Rv) GN=Rv0552 PE=1 SV=3	Conserved hypotheticals	Rv0552	A0A0H3M1V4	O06418	57.327	18.9	19.3872	20.5066	22.2181	22.4264	19.0245	22.686	19.7683	19.9029	19.6108	19.2431	17.441	18.2439	4	1	0	2	3	1	2	0	1	1	0	1	0	0	16.592
ECCA3_MYCTU ESX-3 secretion system protein EccA3 OS=Mycobacterium tuberculosis (strain ATCC 25618 / H37Rv) GN=eccA3 PE=1 SV=1;A0A0H3M1V9_MYCBP Uncharacterized protein OS=Mycobacterium bovis (strain BCG / Pasteur 1173P2) GN=BCG_0322 PE=4 SV=1	cell wall and cell processes	Rv0282	P9WPI3	A0A0H3M1V9	68.106	18.7	21.474	21.2278	22.0113	22.0529	19.8354	19.7683	20.2036	21.391	21.2803	20.3548	19.1053	20.6526	9	2	3	4	5	4	4	3	5	3	3	3	2	0	25.561
ECCE3_MYCTU ESX-3 secretion system protein EccE3 OS=Mycobacterium tuberculosis (strain ATCC 25618 / H37Rv) GN=eccE3 PE=1 SV=1;A0A0H3M1W7_MYCBP Probable conserved transmembrane protein OS=Mycobacterium bovis (strain BCG / Pasteur 1173P2) GN=BCG_0332 PE=4 SV	cell wall and cell processes	Rv0292	P9WJE5	A0A0H3M1W7	35.932	28.1	18.3717	20.9128	22.6627	20.8829	16.8138	21.4585	17.5909	17.5433	20.2152	19.7677	18.4492	19.5096	6	2	2	3	5	3	2	1	2	1	0	1	0	0	14.878
O53780_MYCTU Probable conserved lipoprotein LpqN OS=Mycobacterium tuberculosis (strain ATCC 25618 / H37Rv) GN=lpqN PE=1 SV=1;A0A0H3M1X0_MYCBP Probable conserved lipoprotein lpqN OS=Mycobacterium bovis (strain BCG / Pasteur 1173P2) GN=lpqN PE=4 SV=1	cell wall and cell processes	Rv0583c	O53780	A0A0H3M1X0	23.682	45.2	25.4807	27.0493	26.4768	25.9684	26.3147	27.6031	27.2091	26.1471	25.3103	27.5167	27.2666	26.2176	5	5	2	5	3	4	5	3	2	3	2	5	4	0	18.576
O07235_MYCTU Membrane protein OS=Mycobacterium tuberculosis (strain ATCC 25618 / H37Rv) GN=Rv0308 PE=1 SV=1;A0A0H3M1X8_MYCBP Probable conserved integral membrane protein OS=Mycobacterium bovis (strain BCG / Pasteur 1173P2) GN=BCG_0348 PE=4 SV=1	cell wall and cell processes	Rv0308	O07235	A0A0H3M1X8	25.613	9.7	18.919	19.3528	20.21	18.3414	17.4053	18.2548	19.6035	19.2904	19.4756	19.5724	19.1589	18.2729	2	2	1	2	2	1	2	0	0	1	0	1	0	0	39.784
Y313_MYCTU Uncharacterized protein Rv0313 OS=Mycobacterium tuberculosis (strain ATCC 25618 / H37Rv) GN=Rv0313 PE=1 SV=1;A0A0H3M1Y1_MYCBP Uncharacterized protein OS=Mycobacterium bovis (strain BCG / Pasteur 1173P2) GN=BCG_0353 PE=4 SV=1	Conserved hypotheticals	Rv0313	P9WL03	A0A0H3M1Y1	13.948	74.2	25.9097	26.1899	26.1899	25.6762	25.5898	25.758	26.7336	25.7423	26.3793	27.7467	28.7983	27.1707	6	4	4	4	2	6	4	4	3	4	2	5	5	0	86.549
A0A0H3M1Z8_MYCBP Isoniazid inductible gene protein iniA OS=Mycobacterium bovis (strain BCG / Pasteur 1173P2) GN=iniA PE=4 SV=1;INIA_MYCTU Isoniazid-induced protein IniA OS=Mycobacterium tuberculosis (strain ATCC 25618 / H37Rv) GN=iniA PE=1 SV=1	cell wall and cell processes	Rv0342	A0A0H3M1Z8	P9WJ99	70.046	7.2	21.2919	20.0391	17.5305	21.9569	20.3308	22.0942	19.4636	21.599	21.0452	21.614	21.3335	18.4261	4	2	0	1	3	3	2	1	2	0	2	2	1	0	23.775
O06298_MYCTU Membrane protein OS=Mycobacterium tuberculosis (strain ATCC 25618 / H37Rv) GN=Rv0347 PE=1 SV=1;A0A0H3M204_MYCBP Probable conserved membrane protein OS=Mycobacterium bovis (strain BCG / Pasteur 1173P2) GN=BCG_0386 PE=4 SV=1	cell wall and cell processes	Rv0347	O06298	A0A0H3M204	36.597	43.9	24.0289	24.5658	24.8718	24.2347	23.9084	24.6615	24.7368	23.5065	24.5803	23.7898	24.138	17.7262	10	2	2	3	3	6	4	3	4	2	4	5	1	0	102.65
O06311_MYCTU Membrane protein OS=Mycobacterium tuberculosis (strain ATCC 25618 / H37Rv) GN=Rv0361 PE=1 SV=1;A0A0H3M210_MYCBP Probable conserved membrane protein OS=Mycobacterium bovis (strain BCG / Pasteur 1173P2) GN=BCG_0399 PE=4 SV=1	cell wall and cell processes	Rv0361	O06311	A0A0H3M210	29.982	44.4	19.303	18.6921	18.676	17.9634	22.5472	18.813	19.6594	18.9118	19.3381	19.7389	20.3393	20.3454	8	2	1	4	2	7	2	1	0	2	0	4	5	0	25.63
VPB29_MYCTU Putative antitoxin VapB29 OS=Mycobacterium tuberculosis (strain ATCC 25618 / H37Rv) GN=vapB29 PE=1 SV=1;A0A0H3M214_MYCBP Uncharacterized protein OS=Mycobacterium bovis (strain BCG / Pasteur 1173P2) GN=BCG_0663A PE=4 SV=1	virulence, detoxification and adaptation	Rv0616A	P9WJ37	A0A0H3M214	8.1951	73.3	18.7209	19.5111	18.8099	18.8359	21.5901	18.7034	19.4641	19.3391	19.0775	19.5867	19.5015	19.8547	4	1	0	2	1	3	2	1	1	2	0	3	2	0	27.721
Y637_MYCTU UPF0336 protein Rv0637 OS=Mycobacterium tuberculosis (strain ATCC 25618 / H37Rv) GN=Rv0637 PE=1 SV=1;A0A0H3M228_MYCBP UPF0336 protein BCG_0686 OS=Mycobacterium bovis (strain BCG / Pasteur 1173P2) GN=BCG_0686 PE=3 SV=1	intermediary metabolism and respiration	Rv0637	P9WFJ9	A0A0H3M228	18.929	55.4	21.5607	22.2049	21.3156	23.2564	20.2717	22.6237	22.0453	23.129	21.6918	22.7146	23.7435	21.8836	7	3	4	5	4	5	3	4	3	4	4	6	4	0	60.653
A0A0H3M233_MYCBP Methoxy mycolic acid synthase 2 mmaA2 OS=Mycobacterium bovis (strain BCG / Pasteur 1173P2) GN=mmaA2 PE=4 SV=1;MMAA2_MYCTU Cyclopropane mycolic acid synthase MmaA2 OS=Mycobacterium tuberculosis (strain ATCC 25618 / H37Rv) GN=mmaA2 PE=1 SV=1	lipid metabolism	Rv0644c	A0A0H3M233	Q79FX6	32.681	83.6	25.6278	25.3073	25.3166	25.9823	21.3764	26.1103	24.905	25.9179	24.6672	25.5969	25.7203	24.7494	16	9	9	13	8	11	10	10	7	8	7	12	11	0	113.42
MKL_MYCTU Probable ribonucleotide transport ATP-binding protein mkl OS=Mycobacterium tuberculosis (strain ATCC 25618 / H37Rv) GN=mkl PE=1 SV=1;A0A0H3M245_MYCBP Possible ribonucleotide-transport ATP-binding protein ABC transporter mkl OS=Mycobacterium bovis	cell wall and cell processes	Rv0655	P9WQL5	A0A0H3M245	39.394	42.3	22.9697	21.838	21.8155	24.0827	21.8909	23.7068	22.0498	23.9673	21.7733	23.2522	23.2264	22.7063	10	6	4	6	3	8	4	4	3	4	2	7	6	0	49.379
O86336_MYCTU Beta lactamase like protein OS=Mycobacterium tuberculosis (strain ATCC 25618 / H37Rv) GN=Rv0406c PE=1 SV=1;A0A0H3M246_MYCBP Beta lactamase like protein OS=Mycobacterium bovis (strain BCG / Pasteur 1173P2) GN=BCG_0445c PE=4 SV=1	Conserved hypotheticals	Rv0406c	O86336	A0A0H3M246	29.22	20.6	21.5593	19.6729	22.2671	22.499	17.7499	21.8182	19.9308	22.066	21.4189	19.952	18.2669	22.7085	3	2	1	3	3	0	2	0	2	3	1	1	3	0	120.58
MAZE2_MYCTU Probable antitoxin MazE2 OS=Mycobacterium tuberculosis (strain ATCC 25618 / H37Rv) GN=mazE2 PE=3 SV=1;A0A0H3M249_MYCBP Uncharacterized protein OS=Mycobacterium bovis (strain BCG / Pasteur 1173P2) GN=BCG_0709c PE=4 SV=1	virulence, detoxification and adaptation	Rv0660c	O06779	A0A0H3M249	9.1689	17.3	19.7278	18.4538	19.2026	18.9902	20.251	18.7671	20.1737	20.2341	19.7076	19.8856	17.629	20.2406	1	1	0	1	0	1	1	1	0	1	0	1	1	0	9.3598
P96257_MYCTU ABC transporter substrate-binding protein OS=Mycobacterium tuberculosis (strain ATCC 25618 / H37Rv) GN=glnH PE=1 SV=1;A0A0H3M252_MYCBP Probable glutamine-binding lipoprotein glnH OS=Mycobacterium bovis (strain BCG / Pasteur 1173P2) GN=glnH PE=	cell wall and cell processes	Rv0411c	P96257	A0A0H3M252	35.405	18.6	19.1381	18.3897	18.7175	18.6178	19.2274	20.0953	20.0397	18.8907	18.9199	19.8399	20.9123	20.0277	5	2	2	2	2	3	4	2	1	2	1	2	2	0	84.443
MMPR5_MYCTU HTH-type transcriptional regulator MmpR5 OS=Mycobacterium tuberculosis (strain ATCC 25618 / H37Rv) GN=mmpR5 PE=1 SV=1;A0A0H3M257_MYCBP Uncharacterized protein OS=Mycobacterium bovis (strain BCG / Pasteur 1173P2) GN=BCG_0727 PE=4 SV=1	Conserved hypotheticals	Rv0678	I6Y8F7	A0A0H3M257	18.379	23	18.3315	19.9035	21.087	21.677	17.7046	20.6283	21.7341	22.8968	25.0924	24.0545	22.6164	18.7188	3	1	2	2	2	1	3	2	2	3	3	2	1	0	19.218
MFTB_MYCTU Putative mycofactocin system protein MftB OS=Mycobacterium tuberculosis (strain ATCC 25618 / H37Rv) GN=mftB PE=4 SV=2;A0A0H3M260_MYCBP Uncharacterized protein OS=Mycobacterium bovis (strain BCG / Pasteur 1173P2) GN=BCG_0741 PE=4 SV=1	Conserved hypotheticals	Rv0692	P95038	A0A0H3M260	12.076	20.2	20.219	19.6643	20.0999	19.8985	18.3925	19.3874	20.1991	19.4418	20.0479	19.5378	17.7709	19.6763	1	1	0	1	1	0	1	1	1	0	0	0	0	0.0022432	2.6485
LPQL_MYCTU Probable lipoprotein aminopeptidase LpqL OS=Mycobacterium tuberculosis (strain ATCC 25618 / H37Rv) GN=lpqL PE=1 SV=1;A0A0H3M264_MYCBP Probable lipoprotein aminopeptidase lpqL OS=Mycobacterium bovis (strain BCG / Pasteur 1173P2) GN=lpqL PE=4 SV=1	cell wall and cell processes	Rv0418	P96264	A0A0H3M264	52.042	56.4	24.1684	25.2385	24.3548	24.9498	25.1348	24.6947	25.1972	25.4135	24.3012	25.497	25.2434	24.4046	19	7	4	11	8	16	11	3	5	7	5	13	8	0	163.71
O53728_MYCTU Chorismate synthase OS=Mycobacterium tuberculosis (strain ATCC 25618 / H37Rv) GN=Rv0443 PE=1 SV=3;A0A0H3M286_MYCBP Uncharacterized protein OS=Mycobacterium bovis (strain BCG / Pasteur 1173P2) GN=BCG_0482 PE=4 SV=1	Conserved hypotheticals	Rv0443	O53728	A0A0H3M286	18.958	38	20.522	20.113	19.687	21.0771	17.5927	21.785	20.137	20.2428	19.9606	20.4709	19.6604	19.6524	5	1	1	1	1	3	1	1	1	2	1	3	2	0	35.376
MMPL4_MYCTU Siderophore exporter MmpL4 OS=Mycobacterium tuberculosis (strain ATCC 25618 / H37Rv) GN=mmpL4 PE=1 SV=1;A0A0H3M291_MYCBP Probable conserved transmembrane transport protein mmpL4 OS=Mycobacterium bovis (strain BCG / Pasteur 1173P2) GN=mmpL4 PE=4	cell wall and cell processes	Rv0450c	P9WJV3	A0A0H3M291	105.23	11.4	20.0462	18.3394	20.4683	22.0433	20.9362	20.3175	20.3372	19.5106	19.8417	18.1217	19.9299	20.3122	7	2	0	4	1	7	0	0	0	0	0	4	2	0	25.757
O53740_MYCTU Conserved protein OS=Mycobacterium tuberculosis (strain ATCC 25618 / H37Rv) GN=Rv0455c PE=1 SV=3;A0A0H3M296_MYCBP Uncharacterized protein OS=Mycobacterium bovis (strain BCG / Pasteur 1173P2) GN=BCG_0494c PE=4 SV=1	Conserved hypotheticals	Rv0455c	O53740	A0A0H3M296	16.64	51.4	23.0942	21.8893	22.7472	23.3294	23.8242	24.5334	22.9324	23.8073	23.9956	24.0164	23.3998	22.0795	5	5	3	3	4	2	3	3	3	4	3	5	5	0	58.157
O53749_MYCTU 4-carboxymuconolactone decarboxylase OS=Mycobacterium tuberculosis (strain ATCC 25618 / H37Rv) GN=Rv0464c PE=1 SV=1;A0A0H3M2A5_MYCBP Uncharacterized protein OS=Mycobacterium bovis (strain BCG / Pasteur 1173P2) GN=BCG_0504c PE=4 SV=1	Conserved hypotheticals	Rv0464c	O53749	A0A0H3M2A5	21.304	26.3	20.7961	21.0786	20.8273	22.884	18.6504	22.3504	19.5799	21.3342	20.3753	19.2124	20.2737	18.1823	3	2	2	2	2	3	2	1	2	2	1	3	3	0	14.32
UMAA_MYCTU S-adenosylmethionine-dependent methyltransferase UmaA OS=Mycobacterium tuberculosis (strain ATCC 25618 / H37Rv) GN=umaA PE=1 SV=1;A0A0H3M2B0_MYCBP Possible mycolic acid synthase umaA1 OS=Mycobacterium bovis (strain BCG / Pasteur 1173P2) GN=umaA1	lipid metabolism	Rv0469	Q6MX39	A0A0H3M2B0	33.095	61.9	24.4834	23.8648	24.1711	25.0258	23.0526	23.9968	23.7798	24.6223	24.0394	23.7694	23.6055	22.9056	15	6	11	14	9	9	8	8	7	8	5	11	13	0	229.02
PKNA_MYCTU Serine/threonine-protein kinase PknA OS=Mycobacterium tuberculosis (strain ATCC 25618 / H37Rv) GN=pknA PE=1 SV=1;A0A0H3M2C1_MYCBP Transmembrane serine/threonine-protein kinase A pknA OS=Mycobacterium bovis (strain BCG / Pasteur 1173P2) GN=pknA P	Regulatory proteins	Rv0015c	P9WI83	A0A0H3M2C1	45.596	29	18.8865	20.1006	18.91	20.6134	18.0695	18.3839	19.1478	18.8705	18.0022	20.9099	18.1833	19.1851	10	1	0	3	3	7	2	0	3	0	0	3	1	0	25.137
A0A0H3M2C5_MYCBP Uncharacterized protein OS=Mycobacterium bovis (strain BCG / Pasteur 1173P2) GN=BCG_0057 PE=4 SV=1	Conserved hypotheticals	Rv0026	A0A0H3M2C5	P9WMB1	49.311	25.6	20.1626	18.827	18.1137	19.6517	19.6776	20.6155	20.8982	19.5412	18.1543	19.1518	19.9054	18.5764	7	3	0	4	2	5	2	0	1	0	0	2	0	0	52.018
PURQ_MYCTU Phosphoribosylformylglycinamidine synthase subunit PurQ OS=Mycobacterium tuberculosis (strain ATCC 25618 / H37Rv) GN=purQ PE=1 SV=1;A0A0H3M2D0_MYCBP Phosphoribosylformylglycinamidine synthase subunit PurQ OS=Mycobacterium bovis (strain BCG / Pas	intermediary metabolism and respiration	Rv0788	P9WHL5	A0A0H3M2D0	23.633	77.7	22.4353	22.2833	22.0005	22.4211	22.6724	23.1059	22.4157	22.0315	21.9716	22.7573	23.9914	21.6266	11	7	4	9	6	9	6	3	5	5	3	5	4	0	73.329
A0A0H3M2D2_MYCBP Uncharacterized protein OS=Mycobacterium bovis (strain BCG / Pasteur 1173P2) GN=BCG_0067c PE=4 SV=1;Y036_MYCTU Uncharacterized protein Rv0036c OS=Mycobacterium tuberculosis (strain ATCC 25618 / H37Rv) GN=Rv0036c PE=1 SV=1	Conserved hypotheticals	Rv0036c	A0A0H3M2D2	P9WM91	24.147	31.9	24.5423	19.3344	24.6618	23.2873	17.9295	22.7047	18.0914	22.421	23.2354	22.896	22.4221	18.7055	4	1	0	1	3	1	2	1	2	1	2	2	2	0	8.6831
Y043_MYCTU Uncharacterized HTH-type transcriptional regulator Rv0043c OS=Mycobacterium tuberculosis (strain ATCC 25618 / H37Rv) GN=Rv0043c PE=1 SV=1;A0A0H3M2D6_MYCBP Probable transcriptional regulatory protein (Probably gntR-FAMILY) OS=Mycobacterium bovis	Regulatory proteins	Rv0043c	P9WMG9	A0A0H3M2D6	27.328	33.2	24.8746	21.0935	24.3124	22.8671	22.2064	23.1008	21.6784	21.591	22.7927	21.0062	21.7946	20.4964	5	1	1	4	2	3	2	1	1	2	1	4	2	0	56.371
I6Y4U9_MYCTU Conserved protein OS=Mycobacterium tuberculosis (strain ATCC 25618 / H37Rv) GN=Rv0799c PE=1 SV=1;A0A0H3M2D9_MYCBP Uncharacterized protein OS=Mycobacterium bovis (strain BCG / Pasteur 1173P2) GN=BCG_0851c PE=4 SV=1	Conserved hypotheticals	Rv0799c	I6Y4U9	A0A0H3M2D9	36.047	54.9	20.2044	19.6457	21.2035	21.716	22.1222	22.94	20.6446	21.9952	20.9491	22.4558	22.6682	20.9777	14	2	1	6	4	7	6	2	4	4	3	10	3	0	250.24
SSB_MYCTU Single-stranded DNA-binding protein OS=Mycobacterium tuberculosis (strain ATCC 25618 / H37Rv) GN=ssb PE=1 SV=1;A0A0H3M2E5_MYCBP Single-stranded DNA-binding protein OS=Mycobacterium bovis (strain BCG / Pasteur 1173P2) GN=ssb PE=3 SV=1	information pathways	Rv0054	P9WGD5	A0A0H3M2E5	17.353	64	24.2226	23.0073	24.2562	21.989	24.822	23.1551	23.1893	22.6196	23.1059	20.9645	25.1382	25.217	6	4	5	5	5	6	4	4	4	3	2	5	6	0	133.11
Y497_MYCTU Uncharacterized protein Rv0497 OS=Mycobacterium tuberculosis (strain ATCC 25618 / H37Rv) GN=Rv0497 PE=1 SV=1;A0A0H3M2E7_MYCBP Probable conserved transmembrane protein OS=Mycobacterium bovis (strain BCG / Pasteur 1173P2) GN=BCG_0539 PE=4 SV=1	cell wall and cell processes	Rv0497	P9WKU3	A0A0H3M2E7	33.092	45.2	19.1393	20.0026	19.3444	17.4618	23.9566	21.6683	19.6288	19.4755	19.9444	19.594	23.205	19.3631	8	5	1	5	1	7	5	1	3	3	2	7	3	0	99.729
I6X9V3_MYCTU Conserved protein OS=Mycobacterium tuberculosis (strain ATCC 25618 / H37Rv) GN=Rv0811c PE=1 SV=1;A0A0H3M2E8_MYCBP Uncharacterized protein OS=Mycobacterium bovis (strain BCG / Pasteur 1173P2) GN=BCG_0863c PE=3 SV=1	Conserved hypotheticals	Rv0811c	I6X9V3	A0A0H3M2E8	39.446	34	22.1424	21.906	21.7877	22.442	19.7567	23.3669	22.0043	21.3712	21.3984	21.8885	22.9243	19.1183	9	4	1	5	6	7	8	2	5	3	4	7	1	0	126.75
Y501_MYCTU Uncharacterized protein Rv0501 OS=Mycobacterium tuberculosis (strain ATCC 25618 / H37Rv) GN=Rv0501 PE=1 SV=1;A0A0H3M2F1_MYCBP Possible udp-glucose 4-epimerase galE2 OS=Mycobacterium bovis (strain BCG / Pasteur 1173P2) GN=galE2 PE=4 SV=1	intermediary metabolism and respiration	Rv0501	P9WKT3	A0A0H3M2F1	41.064	14.4	20.2881	19.7952	20.7319	22.51	16.8882	21.5584	18.8567	21.7367	19.7841	20.5776	20.3712	19.1747	4	1	1	2	2	2	2	1	2	1	2	3	0	0	16.21
A0A0H3M2F3_MYCBP Probable isocitrate dehydrogenase OS=Mycobacterium bovis (strain BCG / Pasteur 1173P2) GN=icd2 PE=4 SV=1;O53611_MYCTU Isocitrate dehydrogenase OS=Mycobacterium tuberculosis (strain ATCC 25618 / H37Rv) GN=icd2 PE=1 SV=1	intermediary metabolism and respiration	Rv0066c	A0A0H3M2F3	O53611	82.535	47.7	25.106	23.0922	24.6043	25.7441	25.0646	24.6334	23.2728	24.8019	25.3874	24.1907	23.6331	23.83	24	8	6	14	6	16	9	3	4	4	4	17	9	0	80.7
O33358_MYCTU Membrane protein OS=Mycobacterium tuberculosis (strain ATCC 25618 / H37Rv) GN=Rv0513 PE=1 SV=1;A0A0H3M2F9_MYCBP Possible conserved transmembrane protein OS=Mycobacterium bovis (strain BCG / Pasteur 1173P2) GN=BCG_0556 PE=4 SV=1	cell wall and cell processes	Rv0513	O33358	A0A0H3M2F9	19.401	18.1	19.015	19.236	18.0822	15.0546	19.1765	14.9816	18.7207	19.2995	19.4957	19.3568	16.5996	16.6587	3	1	1	1	1	2	1	0	0	1	0	1	1	0	9.1608
DATIN_MYCTU Dormancy associated translation inhibitor OS=Mycobacterium tuberculosis (strain ATCC 25618 / H37Rv) GN=Rv0079 PE=1 SV=1;A0A0H3M2G5_MYCBP Uncharacterized protein OS=Mycobacterium bovis (strain BCG / Pasteur 1173P2) GN=BCG_0112 PE=4 SV=1	Conserved hypotheticals	Rv0079	P9WMA9	A0A0H3M2G5	29.506	8.4	19.3055	21.8758	18.4289	21.6604	18.3578	20.5582	19.0762	20.9452	19.4571	20.3188	18.8847	17.8716	2	1	1	1	2	0	2	2	2	1	2	2	1	0	66.215
Y525_MYCTU Uncharacterized protein Rv0525 OS=Mycobacterium tuberculosis (strain ATCC 25618 / H37Rv) GN=Rv0525 PE=1 SV=1;A0A0H3M2G6_MYCBP Uncharacterized protein OS=Mycobacterium bovis (strain BCG / Pasteur 1173P2) GN=BCG_0568 PE=4 SV=1	Conserved hypotheticals	Rv0525	O06391	A0A0H3M2G6	22.212	73.8	22.5965	23.1326	22.8488	23.4262	23.9276	24.4901	23.2259	23.3306	22.5775	22.9872	23.8013	23.5737	11	9	6	9	6	8	8	4	5	8	6	9	7	0	203.4
I6Y8X0_MYCTU Probable proline iminopeptidase Pip (Prolyl aminopeptidase) (Pap) OS=Mycobacterium tuberculosis (strain ATCC 25618 / H37Rv) GN=pip PE=1 SV=1;A0A0H3M2G7_MYCBP Probable proline iminopeptidase pip OS=Mycobacterium bovis (strain BCG / Pasteur 1173	intermediary metabolism and respiration	Rv0840c	I6Y8X0	A0A0H3M2G7	31.925	9.4	19.6619	19.3974	19.2116	19.2543	18.5374	19.6514	19.184	19.4322	18.3933	19.8275	17.076	19.0715	2	2	0	2	2	0	2	0	0	1	0	0	0	0	9.8176
O06396_MYCTU Conserved protein OS=Mycobacterium tuberculosis (strain ATCC 25618 / H37Rv) GN=Rv0530 PE=1 SV=1;A0A0H3M2H1_MYCBP Uncharacterized protein OS=Mycobacterium bovis (strain BCG / Pasteur 1173P2) GN=BCG_0573 PE=4 SV=1	Conserved hypotheticals	Rv0530	O06396	A0A0H3M2H1	43.054	68.9	23.484	23.9285	23.4827	24.978	22.5621	24.972	23.3881	24.0988	23.065	24.1115	24.3863	23.5299	17	12	9	14	8	12	10	4	9	8	7	10	13	0	266.97
O06412_MYCTU Conserved protein OS=Mycobacterium tuberculosis (strain ATCC 25618 / H37Rv) GN=Rv0546c PE=1 SV=1;A0A0H3M2I4_MYCBP Uncharacterized protein OS=Mycobacterium bovis (strain BCG / Pasteur 1173P2) GN=BCG_0590c PE=4 SV=1	Conserved hypotheticals	Rv0546c	O06412	A0A0H3M2I4	14.346	61.7	24.3567	25.1208	24.5918	24.5808	17.9093	25.5727	25.018	25.0781	25.3559	25.4879	23.937	22.403	4	2	2	3	3	1	2	3	3	3	2	4	2	0	30.693
O06417_MYCTU Probable fatty-acid-CoA ligase FadD8 (Fatty-acid-CoA synthetase) (Fatty-acid-CoA synthase) OS=Mycobacterium tuberculosis (strain ATCC 25618 / H37Rv) GN=fadD8 PE=1 SV=1;A0A0H3M2I7_MYCBP Probable fatty-acid-CoA ligase fadD8 OS=Mycobacterium bovi	lipid metabolism	Rv0551c	O06417	A0A0H3M2I7	61.065	14.5	21.6132	19.1941	21.6959	22.4146	15.8973	21.9924	19.8218	21.665	19.4793	21.5409	20.6697	17.3005	5	2	1	2	4	2	4	0	3	1	2	2	0	0	20.742
Y559_MYCTU Uncharacterized protein Rv0559c OS=Mycobacterium tuberculosis (strain ATCC 25618 / H37Rv) GN=Rv0559c PE=1 SV=1;A0A0H3M2J2_MYCBP Possible conserved secreted protein OS=Mycobacterium bovis (strain BCG / Pasteur 1173P2) GN=BCG_0604c PE=4 SV=1	cell wall and cell processes	Rv0559c	P9WKL3	A0A0H3M2J2	12.117	44.6	24.7234	24.1949	23.8187	24.9853	25.5941	26.0974	25.8333	23.9399	25.7975	26.0277	24.9739	21.9332	3	2	2	3	3	2	2	2	2	3	2	2	2	0	51.789
I6WZM9_MYCTU Cold-shock protein OS=Mycobacterium tuberculosis (strain ATCC 25618 / H37Rv) GN=cspB PE=1 SV=1;A0A0H3M2K4_MYCBP Probable cold shock-like protein B cspB OS=Mycobacterium bovis (strain BCG / Pasteur 1173P2) GN=cspB PE=4 SV=1	virulence, detoxification and adaptation	Rv0871	I6WZM9	A0A0H3M2K4	15.021	62.2	23.6303	23.7061	23.7035	22.0133	27.3048	22.7467	23.8271	22.057	23.52	23.2084	22.368	22.9217	7	5	4	6	7	5	6	3	7	4	6	6	6	0	65.265
CFP32_MYCTU Putative glyoxylase CFP32 OS=Mycobacterium tuberculosis (strain ATCC 25618 / H37Rv) GN=cfp32 PE=1 SV=1;A0A0H3M2K7_MYCBP Uncharacterized protein OS=Mycobacterium bovis (strain BCG / Pasteur 1173P2) GN=TB27.3 PE=4 SV=1	Conserved hypotheticals	Rv0577	P9WIR3	A0A0H3M2K7	27.343	37.5	24.8493	25.584	23.8524	26.1133	23.614	27.2545	26.5601	26.3862	25.4387	26.0478	26.3165	22.4572	6	3	3	3	3	6	3	3	3	3	3	5	6	0	84.355
O07175_MYCTU Probable serine protease PepA (Serine proteinase) (MTB32A) OS=Mycobacterium tuberculosis (strain ATCC 25618 / H37Rv) GN=pepA PE=1 SV=1;A0A0H3M2K8_MYCBP Probable serine protease pepA OS=Mycobacterium bovis (strain BCG / Pasteur 1173P2) GN=pepA	intermediary metabolism and respiration	Rv0125	O07175	A0A0H3M2K8	34.926	23.9	23.0583	24.3342	22.9936	22.85	24.0098	24.8217	24.2755	22.8552	23.7761	23.8235	23.928	24.5496	4	3	2	4	3	4	4	2	3	2	2	4	3	0	93.774
I6WYU2_MYCTU Uncharacterized protein OS=Mycobacterium tuberculosis (strain ATCC 25618 / H37Rv) GN=Rv0597c PE=1 SV=1;A0A0H3M2M1_MYCBP Uncharacterized protein OS=Mycobacterium bovis (strain BCG / Pasteur 1173P2) GN=BCG_0643c PE=4 SV=1	Conserved hypotheticals	Rv0597c	I6WYU2	A0A0H3M2M1	44.694	4.1	23.0393	20.2529	21.7089	20.3753	18.043	17.8822	19.9891	18.6261	21.5064	18.312	17.8714	22.2701	1	1	1	1	1	0	1	1	1	1	1	0	1	0	21.217
P96832_MYCTU NAD(P) transhydrogenase subunit alpha OS=Mycobacterium tuberculosis (strain ATCC 25618 / H37Rv) GN=pntAa PE=1 SV=1;A0A0H3M2N0_MYCBP Probable nad(P) transhydrogenase (Subunit alpha) pntAa [first part] OS=Mycobacterium bovis (strain BCG / Pasteu	intermediary metabolism and respiration	Rv0155	P96832	A0A0H3M2N0	37.693	87.2	27.1354	27.5813	26.9613	26.4376	27.5353	26.5347	27.3537	27.3945	27.1884	26.8847	25.8392	27.1097	20	12	7	15	15	14	15	10	11	8	8	16	15	0	228.83
ECHA6_MYCTU Probable enoyl-CoA hydratase echA6 OS=Mycobacterium tuberculosis (strain ATCC 25618 / H37Rv) GN=echA6 PE=1 SV=1;A0A0H3M2P3_MYCBP Possible enoyl-CoA hydratase echA6 OS=Mycobacterium bovis (strain BCG / Pasteur 1173P2) GN=echA6 PE=3 SV=1	lipid metabolism	Rv0905	P9WNP1	A0A0H3M2P3	26.029	85.6	23.903	25.1403	24.5929	24.6444	24.7106	25.1783	24.699	24.3633	24.4469	24.7024	26.2249	24.9861	13	9	7	10	5	11	11	9	8	9	8	11	9	0	260.84
A0A0H3M2P5_MYCBP MCE-family protein mce1B OS=Mycobacterium bovis (strain BCG / Pasteur 1173P2) GN=mce1B PE=4 SV=1;O07414_MYCTU Mammalian cell entry protein OS=Mycobacterium tuberculosis (strain ATCC 25618 / H37Rv) GN=mce1B PE=1 SV=1	virulence, detoxification and adaptation	Rv0170	A0A0H3M2P5	O07414	37.715	46	25.3753	24.5614	25.6595	24.4628	23.1751	26.2426	24.1041	24.1816	25.5434	23.6361	23.1229	18.7043	11	3	3	4	5	11	3	2	4	2	4	5	2	0	143.06
Y910_MYCTU Toxin Rv0910 OS=Mycobacterium tuberculosis (strain ATCC 25618 / H37Rv) GN=Rv0910 PE=1 SV=1;A0A0H3M2P8_MYCBP Uncharacterized protein OS=Mycobacterium bovis (strain BCG / Pasteur 1173P2) GN=BCG_0962 PE=4 SV=1	Conserved hypotheticals	Rv0910	P9WJ05	A0A0H3M2P8	15.754	30.6	18.6815	19.2107	17.1025	18.6676	17.9463	20.4771	19.7234	17.8019	20.6134	19.5824	21.1451	19.5799	3	1	3	1	1	2	1	1	1	1	1	3	2	0	8.3217
O07419_MYCTU Probable conserved Mce associated membrane protein OS=Mycobacterium tuberculosis (strain ATCC 25618 / H37Rv) GN=Rv0175 PE=1 SV=1;A0A0H3M2Q0_MYCBP Probable conserved mce associated membrane protein OS=Mycobacterium bovis (strain BCG / Pasteur 1	cell wall and cell processes	Rv0175	O07419	A0A0H3M2Q0	22.356	31.9	16.6443	19.5131	16.9082	18.0271	20.7529	16.0753	20.0145	18.9132	18.8597	19.4646	15.3108	17.9278	4	2	0	3	4	4	3	0	0	0	0	3	1	0	56.555
O07424_MYCTU Membrane protein OS=Mycobacterium tuberculosis (strain ATCC 25618 / H37Rv) GN=Rv0180c PE=1 SV=1;A0A0H3M2Q5_MYCBP Probable conserved transmembrane protein OS=Mycobacterium bovis (strain BCG / Pasteur 1173P2) GN=BCG_0217c PE=4 SV=1	cell wall and cell processes	Rv0180c	O07424	A0A0H3M2Q5	47.593	13.9	18.4714	23.2251	21.9734	22.8549	21.6967	23.4369	19.3198	22.3485	22.6132	19.5345	23.5337	18.9576	3	1	1	3	2	2	2	1	2	1	1	2	0	0	154.42
A0A0H3M2Q7_MYCBP Uncharacterized protein OS=Mycobacterium bovis (strain BCG / Pasteur 1173P2) GN=BCG_0685 PE=4 SV=1;I6WYY7_MYCTU (3R)-hydroxyacyl-ACP dehydratase subunit HadB OS=Mycobacterium tuberculosis (strain ATCC 25618 / H37Rv) GN=hadB PE=1 SV=1	intermediary metabolism and respiration	Rv0636	A0A0H3M2Q7	I6WYY7	14.904	73.2	27.7163	26.4442	27.8077	26.1097	25.4382	26.9114	26.7982	25.9295	27.0594	26.042	26.8297	27.0021	6	5	4	5	5	5	5	5	5	5	4	5	5	0	92.653
I6Y946_MYCTU Conserved protein OS=Mycobacterium tuberculosis (strain ATCC 25618 / H37Rv) GN=Rv0925c PE=1 SV=1;A0A0H3M2R3_MYCBP Divalent cation-transport integral membrane protein mntH OS=Mycobacterium bovis (strain BCG / Pasteur 1173P2) GN=BCG_0977c PE=4 S	Conserved hypotheticals	Rv0925c	I6Y946	A0A0H3M2R3	26.944	53.9	24.0201	23.5463	24.4557	24.2145	25.5531	24.1403	24.3633	25.0964	24.3627	24.196	23.7392	24.2878	9	9	4	9	8	8	8	4	3	5	4	9	6	0	113.6
RICR_MYCTU Copper-sensing transcriptional repressor RicR OS=Mycobacterium tuberculosis (strain ATCC 25618 / H37Rv) GN=ricR PE=1 SV=1;A0A0H3M2R5_MYCBP Uncharacterized protein OS=Mycobacterium bovis (strain BCG / Pasteur 1173P2) GN=BCG_0227 PE=4 SV=1	Conserved hypotheticals	Rv0190	O07434	A0A0H3M2R5	10.365	56.2	25.3199	24.731	24.8148	24.7005	20.0359	25.7444	25.9383	24.9886	25.0937	25.4906	25.9881	21.9262	4	3	2	2	2	4	2	2	2	2	2	3	2	0	167.18
CCO_MYCTU Carotenoid cleavage oxygenase OS=Mycobacterium tuberculosis (strain ATCC 25618 / H37Rv) GN=Rv0654 PE=1 SV=1;A0A0H3M2S0_MYCBP Dioxygenase OS=Mycobacterium bovis (strain BCG / Pasteur 1173P2) GN=BCG_0703 PE=3 SV=1	intermediary metabolism and respiration	Rv0654	P9WPR5	A0A0H3M2S0	54.943	24.8	18.4312	18.5942	18.7003	21.0255	17.8073	19.2618	21.8104	20.751	22.3118	22.5631	20.8063	17.4791	7	0	2	1	2	1	2	3	3	2	3	7	1	0	32.399
O53652_MYCTU Conserved protein OS=Mycobacterium tuberculosis (strain ATCC 25618 / H37Rv) GN=Rv0201c PE=1 SV=1;A0A0H3M2S1_MYCBP Uncharacterized protein OS=Mycobacterium bovis (strain BCG / Pasteur 1173P2) GN=BCG_0238c PE=4 SV=1	Conserved hypotheticals	Rv0201c	O53652	A0A0H3M2S1	18.516	28.7	21.9221	22.0025	22.8921	22.2208	19.9127	24.5128	21.384	21.3796	23.2273	21.0778	21.185	21.2043	3	2	2	3	2	3	1	2	2	2	2	2	2	0	23.416
A0A0H3M2S6_MYCBP Conserved transmembrane transport protein mmpL3 OS=Mycobacterium bovis (strain BCG / Pasteur 1173P2) GN=mmpL3 PE=4 SV=1;MMPL3_MYCTU Trehalose monomycolate exporter MmpL3 OS=Mycobacterium tuberculosis (strain ATCC 25618 / H37Rv) GN=mmpL3 PE	cell wall and cell processes	Rv0206c	A0A0H3M2S6	P9WJV5	100.88	29.3	20.4536	21.3031	19.619	22.1482	22.1964	21.3521	21.2152	20.0307	18.4184	20.2439	21.9315	21.1139	18	2	5	9	8	14	8	1	4	4	3	10	6	0	323.31
I6X9J0_MYCTU Acyl-CoA dehydrogenase OS=Mycobacterium tuberculosis (strain ATCC 25618 / H37Rv) GN=fadE8 PE=1 SV=1;A0A0H3M2T2_MYCBP Probable acyl-CoA dehydrogenase fadE8 OS=Mycobacterium bovis (strain BCG / Pasteur 1173P2) GN=fadE8 PE=3 SV=1	lipid metabolism	Rv0672	I6X9J0	A0A0H3M2T2	58.534	31	21.1135	20.9855	21.8279	22.8575	21.853	22.6795	20.3204	21.2232	21.6308	21.243	22.5811	21.8373	11	3	3	7	5	7	4	2	1	2	2	7	4	0	48.318
MMPS5_MYCTU Siderophore export accessory protein MmpS5 OS=Mycobacterium tuberculosis (strain ATCC 25618 / H37Rv) GN=mmpS5 PE=1 SV=1;A0A0H3M2T8_MYCBP Possible conserved membrane protein mmpS5 OS=Mycobacterium bovis (strain BCG / Pasteur 1173P2) GN=mmpS5 PE=	cell wall and cell processes	Rv0677c	P9WJS7	A0A0H3M2T8	15.248	54.9	19.2952	19.1144	18.8472	18.3368	18.6835	19.8848	19.3766	19.5779	19.4209	20.9492	24.7435	19.9166	5	0	2	1	2	2	2	2	2	1	2	3	3	0	30.115
P71540_MYCTU Enoyl-CoA hydratase OS=Mycobacterium tuberculosis (strain ATCC 25618 / H37Rv) GN=echA7 PE=1 SV=1;A0A0H3M2V4_MYCBP Probable enoyl-CoA hydratase echA7 OS=Mycobacterium bovis (strain BCG / Pasteur 1173P2) GN=echA7 PE=4 SV=1	lipid metabolism	Rv0971c	P71540	A0A0H3M2V4	27.604	25.7	18.7205	20.9677	20.6815	20.2014	20.2182	23.0233	20.2332	20.6204	19.6227	20.7021	22.3046	19.0206	5	1	1	2	3	5	2	1	3	1	3	3	1	0	28.714
RS17_MYCTU 30S ribosomal protein S17 OS=Mycobacterium tuberculosis (strain ATCC 25618 / H37Rv) GN=rpsQ PE=1 SV=1;A0A0H3M2V9_MYCBP 30S ribosomal protein S17 OS=Mycobacterium bovis (strain BCG / Pasteur 1173P2) GN=rpsQ PE=3 SV=1	information pathways	Rv0710	P9WH51	A0A0H3M2V9	14.741	34.1	16.391	20.0626	16.4234	18.6194	21.6559	15.3872	20.0909	15.6325	18.4515	18.4484	15.373	16.1267	4	2	1	2	1	4	2	0	2	1	0	3	2	0	51.452
O53667_MYCTU Oxidoreductase OS=Mycobacterium tuberculosis (strain ATCC 25618 / H37Rv) GN=Rv0245 PE=1 SV=1;A0A0H3M2W1_MYCBP Putative oxidoreductase OS=Mycobacterium bovis (strain BCG / Pasteur 1173P2) GN=BCG_0283 PE=4 SV=1	intermediary metabolism and respiration	Rv0245	O53667	A0A0H3M2W1	17.038	38.9	18.1675	19.5776	18.1243	19.0719	17.317	17.8062	19.8721	18.8227	19.8078	18.7715	22.1382	19.9411	3	1	2	2	1	1	1	1	1	1	1	3	2	0	9.5498
O53896_MYCTU Peptidase S1 OS=Mycobacterium tuberculosis (strain ATCC 25618 / H37Rv) GN=pepD PE=1 SV=1;A0A0H3M2W3_MYCBP Probable serine protease OS=Mycobacterium bovis (strain BCG / Pasteur 1173P2) GN=BCG_1038 PE=4 SV=1	intermediary metabolism and respiration	Rv0983	O53896	A0A0H3M2W3	46.452	29.7	20.1709	20.7816	20.1591	19.4659	20.9997	20.9488	19.6506	18.7454	20.4673	22.1618	20.0717	20.6829	8	3	2	5	3	8	2	1	1	2	1	2	4	0	45.004
Y250_MYCTU Uncharacterized protein Rv0250c OS=Mycobacterium tuberculosis (strain ATCC 25618 / H37Rv) GN=Rv0250c PE=1 SV=1;A0A0H3M2W6_MYCBP Uncharacterized protein OS=Mycobacterium bovis (strain BCG / Pasteur 1173P2) GN=BCG_0288c PE=4 SV=1	Conserved hypotheticals	Rv0250c	O53672	A0A0H3M2W6	10.896	87.6	22.6322	23.7672	22.5665	19.5543	25.3682	23.2101	23.5694	20.9169	22.5596	20.7735	26.6278	24.1747	8	5	3	5	3	8	6	4	2	2	1	7	4	0	323.31
MAP11_MYCTU Methionine aminopeptidase 1 OS=Mycobacterium tuberculosis (strain ATCC 25618 / H37Rv) GN=map-1 PE=1 SV=1;A0A0H3M2X0_MYCBP Methionine aminopeptidase OS=Mycobacterium bovis (strain BCG / Pasteur 1173P2) GN=mapA PE=3 SV=1	intermediary metabolism and respiration	Rv0734	P9WK21	A0A0H3M2X0	27.277	41	23.0649	22.2045	22.9149	23.8135	21.4231	24.7246	21.6141	23.2648	21.7276	22.6253	23.4409	21.1407	7	3	3	3	2	5	4	2	2	1	2	5	3	0	188.57
PPE02_MYCTU Uncharacterized PPE family protein PPE2 OS=Mycobacterium tuberculosis (strain ATCC 25618 / H37Rv) GN=PPE2 PE=1 SV=1;A0A0H3M2X1_MYCBP PPE family protein OS=Mycobacterium bovis (strain BCG / Pasteur 1173P2) GN=PPE2 PE=4 SV=1	PE/PPE families	Rv0256c	P9WI47	A0A0H3M2X1	56.951	12.4	19.9861	21.2985	17.3599	17.8711	19.1255	20.7598	20.0397	18.368	19.4851	18.9739	20.7946	18.2248	3	0	2	0	0	3	2	1	0	1	1	2	0	0	6.1463
P95228_MYCTU Acyl-CoA dehydrogenase OS=Mycobacterium tuberculosis (strain ATCC 25618 / H37Rv) GN=fadE6 PE=1 SV=1;A0A0H3M2Y8_MYCBP Probable acyl-CoA dehydrogenase fadE6 OS=Mycobacterium bovis (strain BCG / Pasteur 1173P2) GN=fadE6 PE=4 SV=1	lipid metabolism	Rv0271c	P95228	A0A0H3M2Y8	78.476	12.3	22.2647	22.5128	23.0455	23.7599	17.9809	23.5295	20.3423	22.5414	23.1772	22.2971	21.5359	18.858	5	2	3	3	5	1	3	1	3	2	3	2	1	0	38.002
O53816_MYCTU Methylmalonate-semialdehyde dehydrogenase OS=Mycobacterium tuberculosis (strain ATCC 25618 / H37Rv) GN=mmsA PE=1 SV=1;A0A0H3M2Z1_MYCBP Probable methylmalonate-semialdehyde dehydrogenase mmsA OS=Mycobacterium bovis (strain BCG / Pasteur 1173P2)	intermediary metabolism and respiration	Rv0753c	O53816	A0A0H3M2Z1	54.453	60.8	25.5967	26.0885	26.4763	26.4169	23.7482	27.0076	26.8026	26.3509	26.9931	26.5447	26.3987	25.7493	19	11	8	15	9	16	11	7	9	9	8	14	15	0	253.1
P71814_MYCTU Possible two component system response transcriptional positive regulator PhoP OS=Mycobacterium tuberculosis (strain ATCC 25618 / H37Rv) GN=phoP PE=1 SV=1;A0A0H3M2Z6_MYCBP Possible two component system response transcriptional positive regulat	Regulatory proteins	Rv0757	P71814	A0A0H3M2Z6	27.513	79.4	23.9581	24.0775	23.4274	24.2492	22.0695	24.5943	23.6499	24.7621	23.1616	24.4016	25.1914	24.5187	12	8	8	11	6	5	8	7	8	10	7	11	10	0	132.75
Q6MX51_MYCTU Probable sulfatase OS=Mycobacterium tuberculosis (strain ATCC 25618 / H37Rv) GN=Rv0296c PE=1 SV=1;A0A0H3M314_MYCBP Probable sulfatase OS=Mycobacterium bovis (strain BCG / Pasteur 1173P2) GN=BCG_0336c PE=4 SV=1	intermediary metabolism and respiration	Rv0296c	Q6MX51	A0A0H3M314	51.845	54.2	25.3836	23.668	25.1914	25.3625	23.0451	25.2886	23.7184	24.6011	24.3582	24.3314	24.1366	23.6043	15	11	7	11	8	6	9	5	7	7	8	9	6	0	91.257
I6XWA1_MYCTU Adenylosuccinate lyase OS=Mycobacterium tuberculosis (strain ATCC 25618 / H37Rv) GN=purB PE=1 SV=1;A0A0H3M316_MYCBP Adenylosuccinate lyase OS=Mycobacterium bovis (strain BCG / Pasteur 1173P2) GN=purB PE=3 SV=1	intermediary metabolism and respiration	Rv0777	I6XWA1	A0A0H3M316	51.04	28	23.245	22.0374	23.7164	23.3276	18.0056	21.9595	19.7437	22.7895	23.3363	22.5733	21.2144	18.491	9	2	3	3	4	5	3	1	2	2	2	5	2	0	51.172
P71837_MYCTU Uncharacterized protein OS=Mycobacterium tuberculosis (strain ATCC 25618 / H37Rv) GN=Rv0784 PE=4 SV=2;A0A0H3M322_MYCBP Uncharacterized protein OS=Mycobacterium bovis (strain BCG / Pasteur 1173P2) GN=BCG_0835 PE=4 SV=1	Conserved hypotheticals	Rv0784	P71837	A0A0H3M322	25.052	27.2	21.0134	22.3477	20.2209	21.459	19.2423	20.8074	19.4843	21.1986	20.8645	19.5582	21.8335	19.3242	5	2	2	3	5	4	4	1	2	2	1	3	2	0	16.37
I6Y8S6_MYCTU Phosphoribosylformylglycinamidine synthase subunit PurS OS=Mycobacterium tuberculosis (strain ATCC 25618 / H37Rv) GN=purS PE=1 SV=1;A0A0H3M327_MYCBP Phosphoribosylformylglycinamidine synthase subunit PurS OS=Mycobacterium bovis (strain BCG / P	Conserved hypotheticals	Rv0787A	I6Y8S6	A0A0H3M327	8.6217	44.3	21.348	21.7787	21.3407	23.802	23.6109	21.2268	22.1946	21.864	21.4786	22.0472	22.2145	22.8462	3	3	3	3	2	3	3	3	3	3	3	3	3	0	34.517
I6WZG6_MYCTU 29 kDa antigen CFP29 OS=Mycobacterium tuberculosis (strain ATCC 25618 / H37Rv) GN=cfp29 PE=1 SV=1;A0A0H3M336_MYCBP 29 kDa antigen cfp29 OS=Mycobacterium bovis (strain BCG / Pasteur 1173P2) GN=cfp29 PE=4 SV=1	virulence, detoxification and adaptation	Rv0798c	I6WZG6	A0A0H3M336	28.83	66.4	23.7207	24.9962	23.8624	21.6029	23.816	24.0397	25.0054	23.0726	23.8067	23.7747	26.5083	25.2862	13	8	4	9	8	11	9	5	6	4	5	8	10	0	152.42
O07243_MYCTU Muconolactone delta-isomerase OS=Mycobacterium tuberculosis (strain ATCC 25618 / H37Rv) GN=Rv0316 PE=1 SV=1;A0A0H3M337_MYCBP Possible muconolactone isomerase OS=Mycobacterium bovis (strain BCG / Pasteur 1173P2) GN=BCG_0356 PE=4 SV=1	intermediary metabolism and respiration	Rv0316	O07243	A0A0H3M337	22.331	80.9	23.2406	22.694	23.2588	19.1673	23.6637	22.5726	22.7452	20.9687	22.8644	18.651	20.826	22.8129	9	2	5	4	2	7	4	2	3	3	1	6	4	0	54.936
O53404_MYCTU Conserved protein OS=Mycobacterium tuberculosis (strain ATCC 25618 / H37Rv) GN=Rv1056 PE=1 SV=1;A0A0H3M345_MYCBP Uncharacterized protein OS=Mycobacterium bovis (strain BCG / Pasteur 1173P2) GN=BCG_1114 PE=4 SV=1	Conserved hypotheticals	Rv1056	O53404	A0A0H3M345	28.945	47.2	24.8059	24.5088	24.6089	24.9372	20.4057	21.1998	23.1379	24.692	24.1905	24.9197	23.9397	24.3615	7	4	2	5	4	5	2	2	3	5	4	6	5	0	72.352
O53419_MYCTU 3-hydroxyisobutyryl-CoA hydrolase OS=Mycobacterium tuberculosis (strain ATCC 25618 / H37Rv) GN=echA9 PE=1 SV=1;A0A0H3M356_MYCBP Possible enoyl-CoA hydratase echA9 OS=Mycobacterium bovis (strain BCG / Pasteur 1173P2) GN=echA9 PE=4 SV=1	lipid metabolism	Rv1071c	O53419	A0A0H3M356	36.354	74.5	26.2155	25.5735	26.2143	25.7367	23.9274	26.2641	26.3662	25.2189	26.1506	25.8687	26.7154	25.581	13	7	6	9	8	8	10	7	4	8	5	8	8	0	281.22
RMLA_MYCTU Glucose-1-phosphate thymidylyltransferase OS=Mycobacterium tuberculosis (strain ATCC 25618 / H37Rv) GN=rmlA PE=1 SV=1;A0A0H3M357_MYCBP Glucose-1-phosphate thymidylyltransferase OS=Mycobacterium bovis (strain BCG / Pasteur 1173P2) GN=rmlA PE=3 SV	intermediary metabolism and respiration	Rv0334	P9WH13	A0A0H3M357	31.492	21.9	19.0073	22.3205	18.21	22.1425	21.7901	21.0767	22.3678	21.813	22.2233	23.5231	21.429	17.7624	4	1	2	3	3	2	2	2	3	2	3	2	2	0	8.5231
MCA_MYCTU Mycothiol S-conjugate amidase OS=Mycobacterium tuberculosis (strain ATCC 25618 / H37Rv) GN=mca PE=1 SV=1;A0A0H3M362_MYCBP Mycothiol S-conjugate amidase OS=Mycobacterium bovis (strain BCG / Pasteur 1173P2) GN=mca PE=3 SV=1	virulence, detoxification and adaptation	Rv1082	P9WJN1	A0A0H3M362	32.731	57.3	26.1523	24.5204	25.1992	25.0923	22.7402	25.5333	25.1055	23.9153	25.0046	24.7943	24.8592	23.5152	11	6	4	8	3	6	7	3	4	8	3	9	8	0	52.064
I6WZI4_MYCTU Conserved protein OS=Mycobacterium tuberculosis (strain ATCC 25618 / H37Rv) GN=Rv0822c PE=1 SV=1;A0A0H3M363_MYCBP Uncharacterized protein OS=Mycobacterium bovis (strain BCG / Pasteur 1173P2) GN=BCG_0875c PE=4 SV=1	Conserved hypotheticals	Rv0822c	I6WZI4	A0A0H3M363	72.904	8.3	22.2248	21.0836	22.524	22.18	17.5504	21.8373	20.7527	21.2629	21.2689	21.0147	20.1177	18.0182	3	2	1	1	2	1	2	1	2	1	1	1	0	0	14.874
O53444_MYCTU Carbohydrate degradation protein OS=Mycobacterium tuberculosis (strain ATCC 25618 / H37Rv) GN=Rv1096 PE=1 SV=1;A0A0H3M373_MYCBP Possible glycosyl hydrolase OS=Mycobacterium bovis (strain BCG / Pasteur 1173P2) GN=BCG_1156 PE=4 SV=1	intermediary metabolism and respiration	Rv1096	O53444	A0A0H3M373	31.109	15.8	20.0177	20.2428	19.4889	20.473	19.9579	20.9762	20.9475	20.5821	19.7007	20.6769	21.8196	18.1842	3	3	2	2	2	2	2	0	2	1	2	2	1	0	9.3216
MAZF3_MYCTU Endoribonuclease MazF3 OS=Mycobacterium tuberculosis (strain ATCC 25618 / H37Rv) GN=mazF3 PE=1 SV=1;A0A0H3M375_MYCBP Uncharacterized protein OS=Mycobacterium bovis (strain BCG / Pasteur 1173P2) GN=BCG_1162c PE=4 SV=1	virulence, detoxification and adaptation	Rv1102c	P9WIH9	A0A0H3M375	11.05	30.1	18.8592	18.1281	16.8418	18.9849	17.8762	19.436	17.9074	18.5657	18.7915	17.977	18.8518	19.7186	2	1	1	2	2	1	2	2	1	1	2	2	1	0	77.008
A0A0H3M379_MYCBP Uncharacterized protein OS=Mycobacterium bovis (strain BCG / Pasteur 1173P2) GN=BCG_1169c PE=4 SV=1;Y1109_MYCTU Uncharacterized protein Rv1109c OS=Mycobacterium tuberculosis (strain ATCC 25618 / H37Rv) GN=Rv1109c PE=1 SV=1	Conserved hypotheticals	Rv1109c	A0A0H3M379	P9WM59	22.987	70.8	24.5127	27.4023	25.5669	24.7201	25.2364	26.3552	28.15	25.7189	25.5743	26.5433	27.4569	25.9394	9	4	6	6	6	9	7	4	5	5	5	7	7	0	251.35
A0A0H3M380_MYCBP Chaperone protein DnaJ OS=Mycobacterium bovis (strain BCG / Pasteur 1173P2) GN=dnaJ1 PE=3 SV=1;DNAJ1_MYCTU Chaperone protein DnaJ 1 OS=Mycobacterium tuberculosis (strain ATCC 25618 / H37Rv) GN=dnaJ1 PE=1 SV=1	virulence, detoxification and adaptation	Rv0352	A0A0H3M380	P9WNV9	41.315	64.3	28.6549	26.9696	28.3132	26.9517	29.358	27.1987	27.8366	27.8119	27.8156	28.3748	27.6268	26.3044	17	12	6	12	14	14	14	8	10	8	4	15	12	0	184.29
VPC32_MYCTU Ribonuclease VapC32 OS=Mycobacterium tuberculosis (strain ATCC 25618 / H37Rv) GN=vapC32 PE=1 SV=1;A0A0H3M381_MYCBP Ribonuclease VapC OS=Mycobacterium bovis (strain BCG / Pasteur 1173P2) GN=vapC PE=3 SV=1	virulence, detoxification and adaptation	Rv1114	P9WF73	A0A0H3M381	13.476	11.3	18.4172	19.2858	20.341	18.874	18.0491	19.2509	19.9848	18.7575	19.5891	20.8603	19.1026	19.0316	1	1	1	1	1	0	1	1	0	1	1	1	0	0	9.626
I6X9X6_MYCTU Methyltransferase type 11 OS=Mycobacterium tuberculosis (strain ATCC 25618 / H37Rv) GN=Rv0839 PE=1 SV=1;A0A0H3M383_MYCBP Uncharacterized protein OS=Mycobacterium bovis (strain BCG / Pasteur 1173P2) GN=BCG_0891 PE=4 SV=1	Conserved hypotheticals	Rv0839	I6X9X6	A0A0H3M383	29.64	18.1	19.0712	19.3869	18.8632	19.4743	17.9281	21.1207	18.9513	18.9207	19.6028	19.5399	20.7938	19.2959	3	0	0	2	2	0	2	1	0	1	1	3	1	0	19.752
O06570_MYCTU Conserved protein OS=Mycobacterium tuberculosis (strain ATCC 25618 / H37Rv) GN=Rv1118c PE=1 SV=1;A0A0H3M384_MYCBP Uncharacterized protein OS=Mycobacterium bovis (strain BCG / Pasteur 1173P2) GN=BCG_1179c PE=4 SV=1	Conserved hypotheticals	Rv1118c	O06570	A0A0H3M384	32.189	29	19.5978	21.6958	21.5625	22.1843	20.1116	22.5329	20.3785	20.9427	21.0505	18.9518	23.0968	20.7407	6	1	3	2	3	4	4	2	3	4	1	4	2	0	16.416
NARL_MYCTU Probable transcriptional regulatory protein NarL OS=Mycobacterium tuberculosis (strain ATCC 25618 / H37Rv) GN=narL PE=1 SV=1;A0A0H3M389_MYCBP Possible nitrate/nitrite response transcriptional regulatory protein narL OS=Mycobacterium bovis (strai	Regulatory proteins	Rv0844c	P9WGM5	A0A0H3M389	22.916	53.7	25.3683	24.4228	25.5918	24.5488	27.6084	25.8914	19.8654	19.7276	25.5549	19.5574	26.1929	25.2505	7	3	2	4	3	6	4	1	2	2	2	3	4	0	88.025
Y364_MYCTU Uncharacterized membrane protein Rv0364 OS=Mycobacterium tuberculosis (strain ATCC 25618 / H37Rv) GN=Rv0364 PE=1 SV=1;A0A0H3M393_MYCBP Possible conserved transmembrane protein OS=Mycobacterium bovis (strain BCG / Pasteur 1173P2) GN=BCG_0402 PE=4	cell wall and cell processes	Rv0364	P9WP09	A0A0H3M393	24.489	14.1	19.3369	19.5237	17.883	17.1136	17.7579	17.1875	19.8522	19.9884	17.9961	19.1657	17.8044	17.9116	3	1	0	2	1	1	2	1	0	1	0	3	0	0	6.3497
O06543_MYCTU Carnitine dehydratase OS=Mycobacterium tuberculosis (strain ATCC 25618 / H37Rv) GN=mcr PE=1 SV=3;A0A0H3M3A3_MYCBP Probable alpha-methylacyl-CoA racemase mcr OS=Mycobacterium bovis (strain BCG / Pasteur 1173P2) GN=mcr PE=4 SV=1	lipid metabolism	Rv1143	O06543	A0A0H3M3A3	38.684	10.8	22.1825	19.8048	21.8155	21.5972	17.1713	21.6047	19.7992	20.9289	20.6843	20.6823	18.7058	18.5956	2	1	1	1	1	1	1	1	1	1	1	2	0	0	45.712
O53872_MYCTU 3-hydroxyacyl-CoA dehydrogenase OS=Mycobacterium tuberculosis (strain ATCC 25618 / H37Rv) GN=fadB PE=1 SV=1;A0A0H3M3A7_MYCBP Probable fatty oxidation protein fadB OS=Mycobacterium bovis (strain BCG / Pasteur 1173P2) GN=fadB PE=4 SV=1	lipid metabolism	Rv0860	O53872	A0A0H3M3A7	76.103	54.2	24.324	25.7248	25.7014	26.2008	23.5709	25.2904	24.8167	25.7661	25.0105	25.3536	25.4594	25.3126	27	11	11	15	13	18	12	7	11	13	9	17	15	0	177.4
A0A0H3M3B0_MYCBP Uncharacterized protein OS=Mycobacterium bovis (strain BCG / Pasteur 1173P2) GN=BCG_1216 PE=4 SV=1;Y1155_MYCTU Putative pyridoxine/pyridoxamine 5-phosphate oxidase OS=Mycobacterium tuberculosis (strain ATCC 25618 / H37Rv) GN=Rv1155 PE=1 S	intermediary metabolism and respiration	Rv1155	A0A0H3M3B0	O06553	16.31	51.7	22.9247	22.0024	22.4929	22.4504	20.443	23.6096	21.9269	23.3514	22.7322	23.1979	22.0431	22.2549	6	5	3	4	4	3	5	3	2	4	2	6	5	0	48.602
DODEC_MYCTU Calcium dodecin OS=Mycobacterium tuberculosis (strain ATCC 25618 / H37Rv) GN=secE2 PE=1 SV=1;A0A0H3M3B2_MYCBP Possible protein transport protein secE2 OS=Mycobacterium bovis (strain BCG / Pasteur 1173P2) GN=secE2 PE=4 SV=1	cell wall and cell processes	Rv0379	Q6MX43	A0A0H3M3B2	7.9661	67.6	24.6097	27.0302	23.9666	22.0281	24.2465	24.3115	25.8296	23.4441	23.944	25.1671	27.2816	26.0292	4	4	1	4	3	3	2	3	2	2	2	3	3	0	137.37
METZ_MYCTU O-succinylhomoserine sulfhydrylase OS=Mycobacterium tuberculosis (strain ATCC 25618 / H37Rv) GN=metZ PE=1 SV=1;A0A0H3M3C7_MYCBP O-succinylhomoserine sulfhydrylase OS=Mycobacterium bovis (strain BCG / Pasteur 1173P2) GN=metZ PE=3 SV=1	intermediary metabolism and respiration	Rv0391	P9WGB5	A0A0H3M3C7	43.345	44.6	22.3711	19.6946	22.8667	23.3582	20.6999	22.1783	19.027	22.8908	22.454	21.9071	22.7583	22.3148	10	5	3	6	6	5	5	2	6	6	3	4	3	0	46.224
Y875_MYCTU Uncharacterized protein Rv0875c OS=Mycobacterium tuberculosis (strain ATCC 25618 / H37Rv) GN=Rv0875c PE=1 SV=1;A0A0H3M3C8_MYCBP Possible conserved exported protein OS=Mycobacterium bovis (strain BCG / Pasteur 1173P2) GN=BCG_0927c PE=4 SV=1	cell wall and cell processes	Rv0875c	P9WKR7	A0A0H3M3C8	17.832	42.6	23.5544	19.6548	22.8091	21.8556	18.2172	18.2293	19.8262	18.7536	22.9065	19.4877	21.8562	22.4099	4	1	1	1	2	1	1	1	0	1	1	4	2	0	59.002
Y880_MYCTU Uncharacterized HTH-type transcriptional regulator Rv0880 OS=Mycobacterium tuberculosis (strain ATCC 25618 / H37Rv) GN=Rv0880 PE=1 SV=1;A0A0H3M3D2_MYCBP Possible transcriptional regulatory protein (Possibly marR-family) OS=Mycobacterium bovis (s	Regulatory proteins	Rv0880	P9WMF1	A0A0H3M3D2	15.576	50.3	21.4273	20.5977	22.3882	23.3076	18.1503	24.0803	18.7933	23.7829	19.757	18.9533	17.7736	17.9155	5	0	1	2	2	4	2	0	2	0	1	3	3	0	29.322
O05310_MYCTU Cell division protein DivIVA OS=Mycobacterium tuberculosis (strain ATCC 25618 / H37Rv) GN=Rv1209 PE=1 SV=1;A0A0H3M3E7_MYCBP Uncharacterized protein OS=Mycobacterium bovis (strain BCG / Pasteur 1173P2) GN=BCG_1269 PE=4 SV=1	Conserved hypotheticals	Rv1209	O05310	A0A0H3M3E7	13.121	41.8	16.4639	19.929	15.9271	16.6629	20.6987	15.5271	19.1399	16.4108	20.0102	19.3277	15.3458	18.1201	4	2	0	3	2	4	2	0	2	0	1	2	0	0	39.711
A0A0H3M3E8_MYCBP Citrate synthase OS=Mycobacterium bovis (strain BCG / Pasteur 1173P2) GN=gltA2 PE=3 SV=1;CISY1_MYCTU Citrate synthase 1 OS=Mycobacterium tuberculosis (strain ATCC 25618 / H37Rv) GN=gltA2 PE=1 SV=1	intermediary metabolism and respiration	Rv0896	A0A0H3M3E8	P9WPD5	47.948	77	27.226	26.6753	27.2524	27.0799	24.9123	27.958	27.1422	27.1343	27.4894	27.4343	26.7776	26.2257	21	14	10	17	15	13	13	10	8	13	8	15	16	0	277.68
O05316_MYCTU Conserved protein OS=Mycobacterium tuberculosis (strain ATCC 25618 / H37Rv) GN=Rv1215c PE=1 SV=1;A0A0H3M3F0_MYCBP Uncharacterized protein OS=Mycobacterium bovis (strain BCG / Pasteur 1173P2) GN=BCG_1275c PE=4 SV=1	Conserved hypotheticals	Rv1215c	O05316	A0A0H3M3F0	62.61	11.9	18.7918	20.1058	18.105	20.0331	17.3901	19.2505	19.2845	18.3741	18.7414	20.0663	18.9955	20.1725	5	0	0	2	4	3	4	0	2	0	0	4	0	0	12.282
ACKA_MYCTU Acetate kinase OS=Mycobacterium tuberculosis (strain ATCC 25618 / H37Rv) GN=ackA PE=1 SV=1;A0A0H3M3F1_MYCBP Acetate kinase OS=Mycobacterium bovis (strain BCG / Pasteur 1173P2) GN=ackA PE=3 SV=1	intermediary metabolism and respiration	Rv0409	P9WQH1	A0A0H3M3F1	41.318	12.7	19.984	18.85	18.1505	17.5726	17.4887	17.7144	20.118	18.0902	18.2066	19.5576	19.7564	18.6646	3	0	0	2	2	0	2	0	1	0	0	2	1	0	6.6523
O86315_MYCTU Conserved protein OS=Mycobacterium tuberculosis (strain ATCC 25618 / H37Rv) GN=Rv1232c PE=1 SV=1;A0A0H3M3F9_MYCBP Uncharacterized protein OS=Mycobacterium bovis (strain BCG / Pasteur 1173P2) GN=BCG_1292c PE=4 SV=1	Conserved hypotheticals	Rv1232c	O86315	A0A0H3M3F9	47.374	22.8	19.6546	18.7317	19.127	19.042	18.0974	19.34	20.7491	18.9403	18.2276	19.0853	21.4681	18.8744	5	0	1	1	3	4	2	0	2	0	0	4	1	0	12.628
Y909_MYCTU Antitoxin Rv0909 OS=Mycobacterium tuberculosis (strain ATCC 25618 / H37Rv) GN=Rv0909 PE=1 SV=1;A0A0H3M3G2_MYCBP Uncharacterized protein OS=Mycobacterium bovis (strain BCG / Pasteur 1173P2) GN=BCG_0961 PE=4 SV=1	Conserved hypotheticals	Rv0909	P9WJ07	A0A0H3M3G2	6.403	59.3	15.1553	20.0383	15.0533	18.2005	19.7894	14.6414	19.887	19.5604	19.4044	19.3673	13.7535	18.2277	3	3	0	3	1	3	3	0	1	1	0	2	1	0	12.494
P96267_MYCTU Alpha/beta hydrolase OS=Mycobacterium tuberculosis (strain ATCC 25618 / H37Rv) GN=Rv0421c PE=1 SV=1;A0A0H3M3G7_MYCBP Uncharacterized protein OS=Mycobacterium bovis (strain BCG / Pasteur 1173P2) GN=BCG_0460c PE=4 SV=1	Conserved hypotheticals	Rv0421c	P96267	A0A0H3M3G7	21.738	43.1	20.8554	21.5534	20.1975	21.0196	18.4689	22.6068	21.5181	20.4985	21.2641	21.0249	20.676	18.169	3	3	1	1	2	0	3	1	1	1	1	1	0	0	49.061
I6XWJ8_MYCTU Acetyl-CoA acetyltransferase OS=Mycobacterium tuberculosis (strain ATCC 25618 / H37Rv) GN=Rv0914c PE=1 SV=1;A0A0H3M3G9_MYCBP Possible lipid carrier protein or keto acyl-CoA thiolase OS=Mycobacterium bovis (strain BCG / Pasteur 1173P2) GN=BCG_0	lipid metabolism	Rv0914c	I6XWJ8	A0A0H3M3G9	43.874	16.3	19.0243	19.037	18.2297	21.4002	21.0318	22.4465	19.9244	19.1964	18.7136	19.3573	21.0232	18.976	3	1	1	1	2	2	2	1	1	1	1	3	0	0	24.069
P96273_MYCTU Probable exodeoxyribonuclease III protein XthA (Exonuclease III) (EXO III) (AP endonuclease VI) OS=Mycobacterium tuberculosis (strain ATCC 25618 / H37Rv) GN=xthA PE=1 SV=1;A0A0H3M3H4_MYCBP Probable exodeoxyribonuclease III protein xthA OS=Myco	information pathways	Rv0427c	P96273	A0A0H3M3H4	32.108	52.2	22.8964	22.7254	21.6504	22.9202	22.0243	24.1808	22.2211	22.1834	22.5684	21.982	24.1124	21.457	14	5	4	6	6	12	5	2	4	3	2	4	4	0	41.62
Y1265_MYCTU Uncharacterized protein Rv1265 OS=Mycobacterium tuberculosis (strain ATCC 25618 / H37Rv) GN=Rv1265 PE=1 SV=1;A0A0H3M3I2_MYCBP Uncharacterized protein OS=Mycobacterium bovis (strain BCG / Pasteur 1173P2) GN=BCG_1324 PE=4 SV=1	Conserved hypotheticals	Rv1265	P9WM49	A0A0H3M3I2	25.229	58	20.6264	19.9075	20.4756	21.1652	20.741	21.8511	19.1713	22.2559	20.2034	21.2677	21.9342	21.5416	11	3	1	3	3	9	3	2	3	2	1	6	3	0	60.183
LPRA_MYCTU Lipoprotein LprA OS=Mycobacterium tuberculosis (strain ATCC 25618 / H37Rv) GN=lprA PE=1 SV=1;A0A0H3M3I4_MYCBP Putative lipoprotein lprA OS=Mycobacterium bovis (strain BCG / Pasteur 1173P2) GN=lprA PE=4 SV=1	cell wall and cell processes	Rv1270c	P9WK55	A0A0H3M3I4	24.874	66.4	25.1922	25.1232	26.3972	25.3607	26.9164	25.763	24.856	25.2375	25.1905	25.735	24.9751	24.5968	9	8	5	8	6	7	7	3	5	7	3	9	8	0	118.9
Y441_MYCTU Uncharacterized protein Rv0441c OS=Mycobacterium tuberculosis (strain ATCC 25618 / H37Rv) GN=Rv0441c PE=1 SV=1;A0A0H3M3I8_MYCBP Uncharacterized protein OS=Mycobacterium bovis (strain BCG / Pasteur 1173P2) GN=BCG_0480c PE=4 SV=1	Conserved hypotheticals	Rv0441c	P9WKW3	A0A0H3M3I8	15.036	22.5	17.8964	18.4828	18.6634	18.1621	18.3112	22.945	19.3098	18.4352	22.2728	22.5196	17.2272	19.5706	2	1	1	1	1	1	1	1	1	1	1	1	1	0	25.144
O86337_MYCTU Lipoprotein LprC OS=Mycobacterium tuberculosis (strain ATCC 25618 / H37Rv) GN=lprC PE=1 SV=3;A0A0H3M3I9_MYCBP Putative lipoprotein lprC OS=Mycobacterium bovis (strain BCG / Pasteur 1173P2) GN=lprC PE=4 SV=1	cell wall and cell processes	Rv1275	O86337	A0A0H3M3I9	18.87	37.8	20.4002	20.376	20.4551	19.7089	22.3446	22.3376	19.7558	19.743	20.1773	19.9714	24.3576	22.1314	5	3	2	3	2	5	3	1	3	3	2	4	3	0	42.448
Y1280_MYCTU Uncharacterized protein Rv1280c OS=Mycobacterium tuberculosis (strain ATCC 25618 / H37Rv) GN=Rv1280c PE=1 SV=1;A0A0H3M3J3_MYCBP Probable periplasmic oligopeptide-binding lipoprotein oppA OS=Mycobacterium bovis (strain BCG / Pasteur 1173P2) GN=o	cell wall and cell processes	Rv1280c	P9WGU5	A0A0H3M3J3	63.476	42.1	21.8097	18.5761	18.4214	21.6756	21.5783	22.3349	20.2824	21.7291	21.5221	18.9365	17.2313	22.6329	12	4	0	1	4	8	3	1	3	2	1	3	3	0	47.388
KHSE_MYCTU Homoserine kinase OS=Mycobacterium tuberculosis (strain ATCC 25618 / H37Rv) GN=thrB PE=1 SV=1;A0A0H3M3K6_MYCBP Homoserine kinase OS=Mycobacterium bovis (strain BCG / Pasteur 1173P2) GN=thrB PE=3 SV=1	intermediary metabolism and respiration	Rv1296	P9WKE7	A0A0H3M3K6	32.346	31	18.3892	23.8433	25.4636	23.4161	24.1909	23.5706	24.3397	22.9994	25.2089	19.3989	22.5488	21.9585	5	3	2	4	2	3	2	1	2	2	1	4	4	0	42.351
O07178_MYCTU Peptidase OS=Mycobacterium tuberculosis (strain ATCC 25618 / H37Rv) GN=Rv0457c PE=1 SV=2;A0A0H3M3K7_MYCBP Probable peptidase OS=Mycobacterium bovis (strain BCG / Pasteur 1173P2) GN=BCG_0497c PE=4 SV=1	intermediary metabolism and respiration	Rv0457c	O07178	A0A0H3M3K7	74.463	12	20.9177	19.3533	22.4857	21.1407	17.4607	20.6861	21.2744	20.9296	21.6065	21.2547	17.0561	18.8942	7	3	1	4	3	2	4	0	3	2	3	4	1	0	20.209
PDUO_MYCTU Cob(I)yrinic acid a,c-diamide adenosyltransferase OS=Mycobacterium tuberculosis (strain ATCC 25618 / H37Rv) GN=Rv1314c PE=1 SV=1;A0A0H3M3L3_MYCBP Uncharacterized protein OS=Mycobacterium bovis (strain BCG / Pasteur 1173P2) GN=BCG_1375c PE=4 SV=1	Conserved hypotheticals	Rv1314c	P9WP99	A0A0H3M3L3	20.694	76.2	26.114	24.6486	26.2179	26.2335	23.329	26.2602	24.9092	26.5522	25.8372	26.238	25.3776	24.0047	9	5	2	4	2	9	5	3	3	2	2	7	7	0	242.08
DLDH_MYCTU Dihydrolipoyl dehydrogenase OS=Mycobacterium tuberculosis (strain ATCC 25618 / H37Rv) GN=lpdC PE=1 SV=1;A0A0H3M3L4_MYCBP Dihydrolipoyl dehydrogenase OS=Mycobacterium bovis (strain BCG / Pasteur 1173P2) GN=lpd PE=3 SV=1	intermediary metabolism and respiration	Rv0462	P9WHH9	A0A0H3M3L4	49.239	69.4	23.1438	25.499	25.0315	24.5692	24.8228	24.8966	24.7394	23.384	24.8863	25.0227	25.2023	24.8595	22	15	10	19	13	15	15	9	12	10	10	15	16	0	219.31
ACEA_MYCTU Isocitrate lyase OS=Mycobacterium tuberculosis (strain ATCC 25618 / H37Rv) GN=icl PE=1 SV=1;A0A0H3M3L9_MYCBP Isocitrate lyase icl OS=Mycobacterium bovis (strain BCG / Pasteur 1173P2) GN=icl PE=4 SV=1	intermediary metabolism and respiration	Rv0467	P9WKK7	A0A0H3M3L9	47.086	64.5	26.8768	27.0666	26.3972	25.5648	26.3479	24.7422	26.5194	25.7498	26.3377	25.966	26.2046	26.5521	17	16	6	16	14	16	11	9	7	9	6	14	13	0	323.31
FADA4_MYCTU Probable acetyl-CoA acetyltransferase OS=Mycobacterium tuberculosis (strain ATCC 25618 / H37Rv) GN=fadA4 PE=1 SV=1;A0A0H3M3M2_MYCBP Probable acetyl-CoA acetyltransferase fadA4 OS=Mycobacterium bovis (strain BCG / Pasteur 1173P2) GN=fadA4 PE=3 S	lipid metabolism	Rv1323	P9WG69	A0A0H3M3M2	40.08	69.9	25.8678	26.7269	25.6131	26.9494	24.6766	27.4279	26.7539	27.2048	26.003	27.0075	26.7634	25.3882	14	11	9	12	9	10	11	6	8	7	8	11	11	0	269.38
CYSO_MYCTU Sulfur carrier protein CysO OS=Mycobacterium tuberculosis (strain ATCC 25618 / H37Rv) GN=cysO PE=1 SV=1;A0A0H3M3M8_MYCBP 9.5 kDa culture filtrate antigen cfp10A OS=Mycobacterium bovis (strain BCG / Pasteur 1173P2) GN=BCG_1397 PE=4 SV=1	intermediary metabolism and respiration	Rv1335	P9WP33	A0A0H3M3M8	9.5566	96.8	25.1958	24.9769	23.8045	25.1691	22.5441	26.0761	26.1921	24.9075	23.9305	24.9822	23.5029	22.5276	8	3	4	4	3	8	5	4	2	4	3	5	5	0	48.184
A0A0H3M3P2_MYCBP Probable UTP--glucose-1-phosphate uridylyltransferase galU OS=Mycobacterium bovis (strain BCG / Pasteur 1173P2) GN=galU PE=4 SV=1;O05576_MYCTU UDP-glucose pyrophosphorylase OS=Mycobacterium tuberculosis (strain ATCC 25618 / H37Rv) GN=galU	intermediary metabolism and respiration	Rv0993	A0A0H3M3P2	O05576	32.406	18.3	20.9327	19.9151	21.4805	20.9382	18.2348	20.7412	20.9131	20.6215	20.9416	20.7171	18.1724	18.7261	4	1	1	1	2	3	1	1	1	2	1	0	0	0	22.951
A0A0H3M3P3_MYCBP Possible membrane protein OS=Mycobacterium bovis (strain BCG / Pasteur 1173P2) GN=BCG_1424c PE=4 SV=1;Y1362_MYCTU Uncharacterized protein Rv1362c OS=Mycobacterium tuberculosis (strain ATCC 25618 / H37Rv) GN=Rv1362c PE=1 SV=1	cell wall and cell processes	Rv1362c	A0A0H3M3P3	P9WM01	23.461	58.2	25.9144	24.7168	18.334	24.8715	17.8964	19.136	24.8966	24.2378	25.2598	25.183	24.9024	24.3725	5	2	2	2	2	3	1	2	2	3	1	3	3	0	61.177
A0A0H3M3P5_MYCBP Uncharacterized protein OS=Mycobacterium bovis (strain BCG / Pasteur 1173P2) GN=BCG_1429c PE=4 SV=1;Y1367_MYCTU Uncharacterized protein Rv1367c OS=Mycobacterium tuberculosis (strain ATCC 25618 / H37Rv) GN=Rv1367c PE=1 SV=2	Conserved hypotheticals	Rv1367c	A0A0H3M3P5	P9WLZ3	41.311	21.2	24.0723	22.41	24.2603	23.9316	17.2673	23.2222	22.6495	23.6735	24.079	23.4514	21.9271	22.257	4	4	2	4	4	0	4	2	4	4	4	3	2	0	77.178
A0A0H3M3P8_MYCBP Uncharacterized protein OS=Mycobacterium bovis (strain BCG / Pasteur 1173P2) GN=BCG_1053 PE=4 SV=1	Conserved hypotheticals		A0A0H3M3P8		9.1665	78.3	20.5669	19.2152	20.6741	19.1664	22.4947	18.8921	20.2193	19.4063	20.4065	19.7068	23.0737	21.0615	4	2	1	2	2	4	1	1	1	1	1	2	2	0	23.101
Y477_MYCTU Uncharacterized protein Rv0477 OS=Mycobacterium tuberculosis (strain ATCC 25618 / H37Rv) GN=Rv0477 PE=1 SV=1;A0A0H3M3Q1_MYCBP Possible conserved secreted protein OS=Mycobacterium bovis (strain BCG / Pasteur 1173P2) GN=BCG_0518 PE=4 SV=1	cell wall and cell processes	Rv0477	P9WKV9	A0A0H3M3Q1	15.658	11.5	18.1782	18.9764	20.1549	18.3493	17.2669	20.6863	19.7839	18.3441	18.5776	19.7227	19.055	18.0563	1	0	1	0	0	1	1	1	1	0	1	1	0	0	6.3612
PYRC_MYCTU Dihydroorotase OS=Mycobacterium tuberculosis (strain ATCC 25618 / H37Rv) GN=pyrC PE=1 SV=1;A0A0H3M3Q3_MYCBP Dihydroorotase OS=Mycobacterium bovis (strain BCG / Pasteur 1173P2) GN=pyrC PE=3 SV=1	intermediary metabolism and respiration	Rv1381	P9WHL3	A0A0H3M3Q3	45.192	27.4	18.6702	20.8942	20.9921	20.4398	21.1279	20.6608	19.3969	19.5979	19.2063	19.3453	21.7906	18.769	8	2	1	3	2	6	3	1	0	1	0	5	1	0	38.993
Y484_MYCTU Uncharacterized oxidoreductase Rv0484c OS=Mycobacterium tuberculosis (strain ATCC 25618 / H37Rv) GN=Rv0484c PE=1 SV=1;A0A0H3M3Q6_MYCBP Putative short-chain type oxidoreductase OS=Mycobacterium bovis (strain BCG / Pasteur 1173P2) GN=BCG_0525c PE=	intermediary metabolism and respiration	Rv0484c	P9WGR5	A0A0H3M3Q6	26.416	34.3	20.2231	20.3879	20.3855	21.2335	19.1223	20.5775	20.1706	20.7702	19.6301	21.8035	21.1999	20.9091	6	3	3	4	2	4	3	2	2	2	2	4	3	0	30.75
SYM_MYCTU Methionine--tRNA ligase OS=Mycobacterium tuberculosis (strain ATCC 25618 / H37Rv) GN=metG PE=1 SV=1;A0A0H3M3Q9_MYCBP Methionine--tRNA ligase OS=Mycobacterium bovis (strain BCG / Pasteur 1173P2) GN=metS PE=3 SV=1	information pathways	Rv1007c	P9WFU5	A0A0H3M3Q9	58.092	37.2	22.9519	22.3456	22.7228	23.7432	20.8436	23.1743	21.877	23.6307	22.4102	22.0202	22.2682	23.4264	11	4	3	6	5	6	4	2	3	5	4	7	7	0	79.756
A0A0H3M3R1_MYCBP Two component sensory transduction protein regX3 (Probably luxR-family) OS=Mycobacterium bovis (strain BCG / Pasteur 1173P2) GN=regX3 PE=4 SV=1;REGX3_MYCTU Sensory transduction protein regX3 OS=Mycobacterium tuberculosis (strain ATCC 25618	Regulatory proteins	Rv0491	A0A0H3M3R1	P9WGL9	24.879	74.9	22.7463	23.4337	23.6966	21.7932	24.6408	24.7225	25.7306	22.4088	25.38	23.452	26.0569	23.2115	11	5	4	6	4	10	8	4	5	4	4	8	8	0	252.67
RL25_MYCTU 50S ribosomal protein L25 OS=Mycobacterium tuberculosis (strain ATCC 25618 / H37Rv) GN=rplY PE=1 SV=1;A0A0H3M3R5_MYCBP 50S ribosomal protein L25 OS=Mycobacterium bovis (strain BCG / Pasteur 1173P2) GN=rplY PE=3 SV=1	information pathways	Rv1015c	P9WHB5	A0A0H3M3R5	22.441	47.4	22.794	24.3679	22.947	23.7997	22.3219	25.0025	23.8631	24.1731	23.3312	25.5177	24.089	23.6464	6	6	4	6	5	4	6	4	4	4	4	6	5	0	114.58
Y495_MYCTU Uncharacterized protein Rv0495c OS=Mycobacterium tuberculosis (strain ATCC 25618 / H37Rv) GN=Rv0495c PE=1 SV=1;A0A0H3M3R6_MYCBP Uncharacterized protein OS=Mycobacterium bovis (strain BCG / Pasteur 1173P2) GN=BCG_0537c PE=4 SV=1	Conserved hypotheticals	Rv0495c	P9WKU5	A0A0H3M3R6	32.992	18.9	18.0142	18.6212	17.0242	19.6112	18.5549	18.9801	19.7815	18.4852	20.6848	19.8733	17.0796	18.8968	4	0	1	2	2	3	2	0	1	0	1	1	1	0	13.678
A0A0H3M3R7_MYCBP Probable lipase lipH OS=Mycobacterium bovis (strain BCG / Pasteur 1173P2) GN=lipH PE=4 SV=1;NLHH_MYCTU Carboxylesterase NlhH OS=Mycobacterium tuberculosis (strain ATCC 25618 / H37Rv) GN=nlhH PE=1 SV=1	intermediary metabolism and respiration	Rv1399c	A0A0H3M3R7	P9WK87	33.88	44.2	18.8311	19.5811	20.5877	20.0754	19.233	20.8246	19.3427	19.1828	20.0821	19.963	20.7223	19.0927	8	1	0	3	1	6	3	0	0	0	0	4	0	0	39.859
P5CR_MYCTU Pyrroline-5-carboxylate reductase OS=Mycobacterium tuberculosis (strain ATCC 25618 / H37Rv) GN=proC PE=1 SV=1;A0A0H3M3S0_MYCBP Pyrroline-5-carboxylate reductase OS=Mycobacterium bovis (strain BCG / Pasteur 1173P2) GN=proC PE=3 SV=1	intermediary metabolism and respiration	Rv0500	P9WHU7	A0A0H3M3S0	30.171	22.7	25.9995	24.5385	26.4646	24.8285	18.4005	24.4366	23.9966	24.5031	25.5342	22.8639	22.688	21.3157	4	2	1	3	4	1	2	1	2	1	1	2	1	0	50.748
MAZG_MYCTU Nucleoside triphosphate pyrophosphohydrolase OS=Mycobacterium tuberculosis (strain ATCC 25618 / H37Rv) GN=mazG PE=1 SV=1;A0A0H3M3S1_MYCBP Uncharacterized protein OS=Mycobacterium bovis (strain BCG / Pasteur 1173P2) GN=BCG_1078 PE=4 SV=1	Conserved hypotheticals	Rv1021	P96379	A0A0H3M3S1	35.413	77.5	26.3355	26.0599	25.3589	24.9952	25.3829	25.7404	26.455	24.1372	26.3845	25.9432	26.0477	24.211	14	6	6	10	4	10	9	6	5	5	4	10	9	0	241.69
P71672_MYCTU Probable transcriptional regulatory protein OS=Mycobacterium tuberculosis (strain ATCC 25618 / H37Rv) GN=Rv1404 PE=1 SV=1;A0A0H3M3S2_MYCBP Probable transcriptional regulatory protein OS=Mycobacterium bovis (strain BCG / Pasteur 1173P2) GN=BCG_	Regulatory proteins	Rv1404	P71672	A0A0H3M3S2	17.521	30.6	19.0162	19.4759	18.6014	19.5574	22.0425	17.1237	18.9528	19.9732	17.0703	20.0336	16.6151	18.9324	5	4	0	3	3	5	4	0	2	2	1	3	3	0	45.756
Y504_MYCTU UPF0336 protein Rv0504c OS=Mycobacterium tuberculosis (strain ATCC 25618 / H37Rv) GN=Rv0504c PE=1 SV=1;A0A0H3M3S6_MYCBP UPF0336 protein BCG_0547c OS=Mycobacterium bovis (strain BCG / Pasteur 1173P2) GN=BCG_0547c PE=3 SV=1	Conserved hypotheticals	Rv0504c	P9WFK3	A0A0H3M3S6	18.36	56.6	23.5534	24.6544	23.7512	25.5662	22.8354	24.9921	25.2064	26.3029	24.9678	25.9694	24.4492	23.7849	7	5	4	5	6	5	5	5	5	5	5	6	6	0	92.592
LPRG_MYCTU Lipoarabinomannan carrier protein LprG OS=Mycobacterium tuberculosis (strain ATCC 25618 / H37Rv) GN=lprG PE=1 SV=1;LPRG_MYCBP Lipoarabinomannan carrier protein LprG OS=Mycobacterium bovis (strain BCG / Pasteur 1173P2) GN=lprG PE=1 SV=1	cell wall and cell processes	Rv1411c	P9WK45	A0A0H3M3S8	24.548	51.3	24.1834	24.448	23.8021	24.2885	27.0672	23.6281	23.1317	24.5991	22.6405	24.2005	22.5701	23.5099	9	7	3	8	7	9	8	2	7	2	4	8	5	0	156.22
Q6MX34_MYCTU Probable uroporphyrin-III C-methyltransferase HemD (Uroporphyrinogen III methylase) (Urogen III methylase) (SUMT) (Urogen III methylase) (UROM) OS=Mycobacterium tuberculosis (strain ATCC 25618 / H37Rv) GN=hemD PE=1 SV=1;A0A0H3M3T0_MYCBP Probab	intermediary metabolism and respiration	Rv0511	Q6MX34	A0A0H3M3T0	58.835	34.5	23.8337	23.324	23.295	22.5595	21.2609	21.6526	21.8993	22.9859	21.8453	21.2894	23.6406	22.567	10	4	6	6	5	5	4	5	6	2	4	6	8	0	42.845
G6PD2_MYCTU Glucose-6-phosphate 1-dehydrogenase 2 OS=Mycobacterium tuberculosis (strain ATCC 25618 / H37Rv) GN=zwf2 PE=1 SV=1;A0A0H3M3W1_MYCBP Glucose-6-phosphate 1-dehydrogenase OS=Mycobacterium bovis (strain BCG / Pasteur 1173P2) GN=zwf2 PE=3 SV=1	intermediary metabolism and respiration	Rv1447c	P9WN73	A0A0H3M3W1	57.342	44.2	23.2354	22.0247	23.3886	23.689	22.4749	23.9259	22.2928	23.2162	23.3515	22.5815	24.0308	23.9194	16	8	4	7	8	8	7	4	5	3	2	8	3	0	77.787
O53146_MYCTU NADPH--quinone reductase OS=Mycobacterium tuberculosis (strain ATCC 25618 / H37Rv) GN=qor PE=1 SV=3;A0A0H3M3W6_MYCBP Probable quinone reductase qor OS=Mycobacterium bovis (strain BCG / Pasteur 1173P2) GN=qor PE=4 SV=1	intermediary metabolism and respiration	Rv1454c	O53146	A0A0H3M3W6	34.046	50.9	18.4979	20.1279	22.8228	24.3773	24.1508	22.2887	20.3468	23.2704	24.5823	23.1582	23.0889	24.5574	12	3	4	8	5	6	6	4	6	3	3	6	8	0	109.23
GPDA2_MYCTU Probable glycerol-3-phosphate dehydrogenase 2 [NAD(P)+] OS=Mycobacterium tuberculosis (strain ATCC 25618 / H37Rv) GN=gpsA2 PE=1 SV=1;A0A0H3M3X0_MYCBP Glycerol-3-phosphate dehydrogenase [NAD(P)+] OS=Mycobacterium bovis (strain BCG / Pasteur 1173	lipid metabolism	Rv0564c	P9WN75	A0A0H3M3X0	36.153	19.6	19.218	19.5365	20.215	20.8764	18.5254	19.7417	19.6173	19.5805	18.4699	19.7607	20.7188	18.7756	4	1	1	1	1	3	1	0	1	1	1	3	1	0	10.381
Y1459_MYCTU Alpha-(1->6)-mannopyranosyltransferase Rv1459c OS=Mycobacterium tuberculosis (strain ATCC 25618 / H37Rv) GN=Rv1459c PE=1 SV=1;A0A0H3M3X1_MYCBP Probable conserved transmembrane protein OS=Mycobacterium bovis (strain BCG / Pasteur 1173P2) GN=BCG_	cell wall and cell processes	Rv1459c	O53150	A0A0H3M3X1	62.693	8.3	19.9598	20.0022	21.5897	21.9171	18.1521	20.5463	19.4566	20.7491	19.6777	19.5623	17.2846	21.4414	3	1	0	2	3	0	1	0	3	1	1	1	2	0	13.796
CSD_MYCTU Probable cysteine desulfurase OS=Mycobacterium tuberculosis (strain ATCC 25618 / H37Rv) GN=csd PE=1 SV=1;A0A0H3M3X5_MYCBP Cysteine desulfurase OS=Mycobacterium bovis (strain BCG / Pasteur 1173P2) GN=csd PE=3 SV=1	intermediary metabolism and respiration	Rv1464	P9WQ69	A0A0H3M3X5	44.596	83.5	23.5401	25.0958	24.0534	24.4975	22.8048	25.3327	25.4359	24.7712	23.9655	24.7893	25.3371	23.4327	20	9	6	10	9	9	8	4	7	7	5	14	13	0	289.75
O53408_MYCTU Uncharacterized protein OS=Mycobacterium tuberculosis (strain ATCC 25618 / H37Rv) GN=Rv1060 PE=1 SV=1;A0A0H3M3X6_MYCBP Uncharacterized protein OS=Mycobacterium bovis (strain BCG / Pasteur 1173P2) GN=BCG_1118 PE=4 SV=1	Conserved hypotheticals	Rv1060	O53408	A0A0H3M3X6	16.866	65.6	23.1445	23.1016	23.4761	23.7336	21.3394	23.0677	22.9789	24.0088	22.9285	23.8133	24.2628	22.5665	6	4	2	3	4	4	4	2	4	3	4	4	4	0	23.435
O53777_MYCTU Conserved protein OS=Mycobacterium tuberculosis (strain ATCC 25618 / H37Rv) GN=Rv0580c PE=1 SV=3;A0A0H3M3Y3_MYCBP Uncharacterized protein OS=Mycobacterium bovis (strain BCG / Pasteur 1173P2) GN=BCG_0625c PE=4 SV=1	Conserved hypotheticals	Rv0580c	O53777	A0A0H3M3Y3	18.035	72.4	22.9927	23.3606	22.3973	24.7176	22.9598	23.7958	21.9695	25.0312	23.0515	25.0653	24.8909	22.6473	10	7	8	9	7	8	9	4	6	8	6	10	8	0	75.65
ECHA8_MYCTU Probable enoyl-CoA hydratase echA8 OS=Mycobacterium tuberculosis (strain ATCC 25618 / H37Rv) GN=echA8 PE=1 SV=1;A0A0H3M3Y5_MYCBP Probable enoyl-CoA hydratase echA8 OS=Mycobacterium bovis (strain BCG / Pasteur 1173P2) GN=echA8 PE=3 SV=1	lipid metabolism	Rv1070c	P9WNN9	A0A0H3M3Y5	27.273	26.1	19.3184	18.526	17.6602	22.5113	15.8644	18.6698	19.535	22.4182	18.6048	22.3839	18.71	20.7065	5	1	2	3	3	3	3	1	2	0	2	5	3	0	10.72
INHA_MYCTU Enoyl-[acyl-carrier-protein] reductase [NADH] OS=Mycobacterium tuberculosis (strain ATCC 25618 / H37Rv) GN=inhA PE=1 SV=1;A0A0H3M400_MYCBP Enoyl-[acyl-carrier-protein] reductase [NADH] OS=Mycobacterium bovis (strain BCG / Pasteur 1173P2) GN=inhA	lipid metabolism	Rv1484	P9WGR1	A0A0H3M400	28.528	58.7	24.2231	24.0039	24.6912	24.3079	23.6309	24.0354	23.8264	24.4063	23.9574	23.8602	24.5801	25.0981	10	8	7	8	8	8	9	8	7	6	7	9	7	0	257.23
3BHS_MYCTU 3 beta-hydroxysteroid dehydrogenase/Delta 5-->4-isomerase OS=Mycobacterium tuberculosis (strain ATCC 25618 / H37Rv) GN=Rv1106c PE=1 SV=1;A0A0H3M427_MYCBP Probable cholesterol dehydrogenase OS=Mycobacterium bovis (strain BCG / Pasteur 1173P2) GN=	intermediary metabolism and respiration	Rv1106c	P9WQP7	A0A0H3M427	40.741	15.1	23.0195	23.8395	23.9295	23.5832	20.5049	22.6438	22.7029	24.1108	23.1738	23.6131	22.0634	21.749	4	1	2	2	1	3	1	1	1	1	2	3	2	0	68.803
VPB32_MYCTU Antitoxin VapB32 OS=Mycobacterium tuberculosis (strain ATCC 25618 / H37Rv) GN=vapB32 PE=1 SV=1;A0A0H3M433_MYCBP Uncharacterized protein OS=Mycobacterium bovis (strain BCG / Pasteur 1173P2) GN=BCG_1173 PE=4 SV=1	virulence, detoxification and adaptation	Rv1113	P9WJ33	A0A0H3M433	6.9729	55.4	15.9314	18.8825	16.0733	16.0335	21.6838	15.9824	16.4266	18.9212	16.5587	19.3172	15.8752	16.856	3	2	1	3	2	3	3	2	1	2	0	3	2	0	20.658
O06569_MYCTU Antibiotic biosynthesis monooxygenase OS=Mycobacterium tuberculosis (strain ATCC 25618 / H37Rv) GN=Rv1117 PE=1 SV=1;A0A0H3M439_MYCBP Uncharacterized protein OS=Mycobacterium bovis (strain BCG / Pasteur 1173P2) GN=BCG_1178 PE=4 SV=1	Conserved hypotheticals	Rv1117	O06569	A0A0H3M439	12.049	67.3	20.6551	22.084	21.7831	20.646	19.5784	22.6611	22.3905	21.2349	21.2284	21.4206	23.5991	21.9205	6	5	3	5	2	5	5	3	2	3	2	6	4	0	106.34
O06574_MYCTU 6-phosphogluconate dehydrogenase OS=Mycobacterium tuberculosis (strain ATCC 25618 / H37Rv) GN=gnd2 PE=1 SV=1;A0A0H3M443_MYCBP Probable 6-phosphogluconate dehydrogenase, decarboxylating gnd2 OS=Mycobacterium bovis (strain BCG / Pasteur 1173P2)	intermediary metabolism and respiration	Rv1122	O06574	A0A0H3M443	36.358	55.6	26.1149	24.7807	24.2377	24.5183	24.6859	25.1845	24.7513	24.8489	23.0727	24.9244	25.1561	25.435	11	5	5	9	7	8	9	5	5	4	4	8	7	0	105.23
Y634A_MYCTU Uncharacterized protein Rv0634A OS=Mycobacterium tuberculosis (strain ATCC 25618 / H37Rv) GN=Rv0634A PE=1 SV=1;A0A0H3M451_MYCBP Uncharacterized protein OS=Mycobacterium bovis (strain BCG / Pasteur 1173P2) GN=BCG_0682 PE=4 SV=1	Conserved hypotheticals	Rv0634A	P9WKS5	A0A0H3M451	9.4264	60.2	22.3719	23.3266	23.4409	18.9937	19.9784	20.9859	23.4753	20.0257	23.1663	20.2974	26.2633	24.7367	4	2	2	2	2	3	3	4	2	3	1	3	3	0	53.453
NUSG_MYCTU Transcription termination/antitermination protein NusG OS=Mycobacterium tuberculosis (strain ATCC 25618 / H37Rv) GN=nusG PE=1 SV=1;A0A0H3M454_MYCBP Transcription termination/antitermination protein NusG OS=Mycobacterium bovis (strain BCG / Paste	information pathways	Rv0639	P9WIU9	A0A0H3M454	25.446	41.2	24.4741	24.2387	23.9913	25.1157	25.6726	25.5795	23.9374	25.4784	23.3411	24.8126	25.8509	23.9044	8	8	8	8	5	6	8	7	5	7	4	7	7	0	105.95
P96935_MYCTU Hydrolase OS=Mycobacterium tuberculosis (strain ATCC 25618 / H37Rv) GN=lipG PE=1 SV=4;A0A0H3M461_MYCBP Probable lipase/esterase lipG OS=Mycobacterium bovis (strain BCG / Pasteur 1173P2) GN=lipG PE=4 SV=1	intermediary metabolism and respiration	Rv0646c	P96935	A0A0H3M461	32.963	16.3	18.8843	21.2481	22.7979	23.0517	18.7617	21.4244	19.2896	21.439	21.4009	21.2442	20.3737	17.4598	3	1	2	2	2	1	2	0	2	2	2	2	2	0	13.552
RL7_MYCTU 50S ribosomal protein L7/L12 OS=Mycobacterium tuberculosis (strain ATCC 25618 / H37Rv) GN=rplL PE=1 SV=1;A0A0H3M466_MYCBP 50S ribosomal protein L7/L12 OS=Mycobacterium bovis (strain BCG / Pasteur 1173P2) GN=rplL PE=3 SV=1	information pathways	Rv0652	P9WHE3	A0A0H3M466	13.44	78.5	27.4727	26.7106	27.138	25.09	30.429	26.8742	27.106	25.6229	26.4039	25.2341	26.8478	27.7744	7	6	7	7	5	6	6	7	6	7	7	7	7	0	49.158
MFTD_MYCTU Putative mycofactocin system heme/flavin oxidoreductase MftD OS=Mycobacterium tuberculosis (strain ATCC 25618 / H37Rv) GN=mftD PE=1 SV=1;A0A0H3M498_MYCBP Possible L-lactate dehydrogenase (Cytochrome) lldD1 OS=Mycobacterium bovis (strain BCG / Pa	intermediary metabolism and respiration	Rv0694	P9WND7	A0A0H3M498	42.161	36.6	23.7008	23.0143	23.5678	23.5013	18.6799	23.6507	19.9422	22.9647	23.5268	22.9014	18.2491	19.4245	8	3	2	5	5	4	4	1	3	3	2	0	3	0	50.107
A0A0H3M4A4_MYCBP Imidazole glycerol phosphate synthase subunit HisH OS=Mycobacterium bovis (strain BCG / Pasteur 1173P2) GN=hisH PE=3 SV=1;HIS5_MYCTU Imidazole glycerol phosphate synthase subunit HisH OS=Mycobacterium tuberculosis (strain ATCC 25618 / H37R	intermediary metabolism and respiration	Rv1602	A0A0H3M4A4	P9WMM1	21.445	43.7	19.6247	21.8398	21.3697	21.9601	20.8809	21.9014	19.3845	21.8424	22.0038	22.2551	21.4156	22.0015	5	2	3	3	2	2	2	2	3	3	2	4	4	0	12.526
O05295_MYCTU Acyl-CoA synthetase OS=Mycobacterium tuberculosis (strain ATCC 25618 / H37Rv) GN=fadD36 PE=1 SV=1;A0A0H3M4A7_MYCBP Probable fatty-acid-CoA ligase fadD36 OS=Mycobacterium bovis (strain BCG / Pasteur 1173P2) GN=fadD36 PE=4 SV=1	lipid metabolism	Rv1193	O05295	A0A0H3M4A7	49.52	39.7	22.538	22.8988	23.0635	23.9371	21.9101	23.3766	22.6649	23.8651	22.8055	22.2679	23.6825	23.1035	9	4	6	5	6	6	6	4	3	3	4	5	5	0	37.163
I6XW38_MYCTU GCN5-related N-acetyltransferase OS=Mycobacterium tuberculosis (strain ATCC 25618 / H37Rv) GN=Rv0730 PE=1 SV=1;A0A0H3M4A9_MYCBP Uncharacterized protein OS=Mycobacterium bovis (strain BCG / Pasteur 1173P2) GN=BCG_0780 PE=4 SV=1	intermediary metabolism and respiration	Rv0730	I6XW38	A0A0H3M4A9	25.98	74.4	23.3769	23.4651	23.2329	23.7124	24.7604	22.9229	18.6111	23.2593	22.7464	22.4852	24.4699	23.5124	15	11	4	12	9	10	8	2	7	5	6	12	11	0	149.06
GPGS_MYCTU Glucosyl-3-phosphoglycerate synthase OS=Mycobacterium tuberculosis (strain ATCC 25618 / H37Rv) GN=gpgS PE=1 SV=1;A0A0H3M4B9_MYCBP Uncharacterized protein OS=Mycobacterium bovis (strain BCG / Pasteur 1173P2) GN=BCG_1268 PE=4 SV=1	intermediary metabolism and respiration	Rv1208	P9WMW9	A0A0H3M4B9	34.379	22.8	22.0614	21.5485	21.1684	23.046	21.0365	21.7054	20.7654	22.5672	20.0553	19.6651	21.577	18.9649	5	2	2	2	3	4	4	1	2	1	1	3	0	0	22.719
VPC33_MYCTU Ribonuclease VapC33 OS=Mycobacterium tuberculosis (strain ATCC 25618 / H37Rv) GN=vapC33 PE=1 SV=1;A0A0H3M4D6_MYCBP Ribonuclease VapC OS=Mycobacterium bovis (strain BCG / Pasteur 1173P2) GN=vapC PE=3 SV=1	virulence, detoxification and adaptation	Rv1242	P9WF69	A0A0H3M4D6	15.905	49	22.0301	21.37	22.4079	22.6354	19.4167	22.684	21.7643	22.5618	22.0047	22.0055	21.3239	21.6968	5	4	4	3	2	1	4	2	2	3	2	4	3	0	23.401
Y770_MYCTU Uncharacterized oxidoreductase Rv0770 OS=Mycobacterium tuberculosis (strain ATCC 25618 / H37Rv) GN=Rv0770 PE=1 SV=1;A0A0H3M4D7_MYCBP Probable dehydrogenase/reductase OS=Mycobacterium bovis (strain BCG / Pasteur 1173P2) GN=BCG_0822 PE=4 SV=1	intermediary metabolism and respiration	Rv0770	P9WNY3	A0A0H3M4D7	30.445	44.7	22.5535	22.4677	22.4476	23.245	21.8716	24.9748	23.8181	23.1392	22.8546	23.0705	23.6797	21.6001	8	4	4	4	5	5	5	3	4	4	4	5	7	0	34.659
RELB_MYCTU Antitoxin RelB OS=Mycobacterium tuberculosis (strain ATCC 25618 / H37Rv) GN=relB PE=1 SV=1;A0A0H3M4D9_MYCBP Antitoxin OS=Mycobacterium bovis (strain BCG / Pasteur 1173P2) GN=BCG_1307c PE=3 SV=1	virulence, detoxification and adaptation	Rv1247c	O50462	A0A0H3M4D9	9.7669	65.2	19.5013	18.3825	20.4221	19.7282	18.8697	19.7632	20.1633	19.7748	20.2339	19.4709	23.119	20.6562	4	1	1	2	1	3	2	1	0	2	0	2	2	0	33.538
A0A0H3M4E5_MYCBP Probable protease II ptrB (Oligopeptidase B) OS=Mycobacterium bovis (strain BCG / Pasteur 1173P2) GN=ptrB PE=4 SV=1;P71834_MYCTU Probable protease II PtrBb [second part] (Oligopeptidase B) OS=Mycobacterium tuberculosis (strain ATCC 25618 /	intermediary metabolism and respiration	Rv0781/Rv0782	A0A0H3M4E5	P71834	80.381	14.6	18.5367	20.3567	21.182	20.818	18.4318	19.9504	19.7671	20.1225	19.6926	19.3592	20.5663	20.5916	8	1	4	6	6	4	5	2	2	4	2	5	2	0	14.354
Y1269_MYCTU Protein Rv1269c OS=Mycobacterium tuberculosis (strain ATCC 25618 / H37Rv) GN=Rv1269c PE=1 SV=1;A0A0H3M4F5_MYCBP Conserved probable secreted protein OS=Mycobacterium bovis (strain BCG / Pasteur 1173P2) GN=BCG_1328c PE=4 SV=1	cell wall and cell processes	Rv1269c	P9WM45	A0A0H3M4F5	12.55	21.8	18.616	19.6359	18.5739	18.3547	20.3015	17.5668	18.4573	19.3361	19.686	19.1571	16.6666	17.613	2	0	1	0	1	2	0	1	0	1	1	2	2	0	4.5911
UVRA_MYCTU UvrABC system protein A OS=Mycobacterium tuberculosis (strain ATCC 25618 / H37Rv) GN=uvrA PE=1 SV=1;A0A0H3M4F7_MYCBP UvrABC system protein A OS=Mycobacterium bovis (strain BCG / Pasteur 1173P2) GN=uvrA PE=3 SV=1	information pathways	Rv1638	P9WQK7	A0A0H3M4F7	106.13	28.6	24.7897	23.9727	25.8048	24.4376	22.6482	23.5994	22.6216	24.1081	25.0969	22.2798	24.3604	21.6951	16	4	8	7	7	6	9	4	4	5	4	14	6	0	223.72
LPRB_MYCTU Putative lipoprotein LprB OS=Mycobacterium tuberculosis (strain ATCC 25618 / H37Rv) GN=lprB PE=1 SV=1;A0A0H3M4G0_MYCBP Putative lipoprotein lprB OS=Mycobacterium bovis (strain BCG / Pasteur 1173P2) GN=lprB PE=4 SV=1	cell wall and cell processes	Rv1274	P9WK53	A0A0H3M4G0	19.739	29.2	25.6572	23.4317	25.3306	25.1015	24.71	24.2305	24.0155	24.3084	23.9327	24.5725	23.5398	25.5015	3	3	2	3	2	2	3	3	2	2	2	3	3	0	82.266
Y802_MYCTU Putative succinyl-CoA transferase Rv0802c OS=Mycobacterium tuberculosis (strain ATCC 25618 / H37Rv) GN=Rv0802c PE=1 SV=1;A0A0H3M4G2_MYCBP Uncharacterized protein OS=Mycobacterium bovis (strain BCG / Pasteur 1173P2) GN=BCG_0854c PE=4 SV=1	intermediary metabolism and respiration	Rv0802c	P9WQG7	A0A0H3M4G2	24.983	24.8	23.6655	22.3	23.6131	23.0709	16.6593	22.3894	22.7633	21.0093	23.6076	22.3283	21.7112	17.8228	3	2	2	2	2	0	2	3	2	3	2	2	1	0	42.67
Y1279_MYCTU Uncharacterized GMC-type oxidoreductase Rv1279 OS=Mycobacterium tuberculosis (strain ATCC 25618 / H37Rv) GN=Rv1279 PE=1 SV=1;A0A0H3M4G4_MYCBP Probable dehydrogenase FAD flavoprotein gmc oxidoreductase OS=Mycobacterium bovis (strain BCG / Pasteu	intermediary metabolism and respiration	Rv1279	P9WMV5	A0A0H3M4G4	57.331	11.4	22.1028	17.7601	22.5258	22.2592	16.7541	21.9557	19.2353	22.2243	22.2641	20.8967	21.2132	18.1994	6	3	1	2	4	3	3	1	2	2	2	3	1	0	23.614
PUR1_MYCTU Amidophosphoribosyltransferase OS=Mycobacterium tuberculosis (strain ATCC 25618 / H37Rv) GN=purF PE=1 SV=1;A0A0H3M4G7_MYCBP Amidophosphoribosyltransferase OS=Mycobacterium bovis (strain BCG / Pasteur 1173P2) GN=purF PE=3 SV=1	intermediary metabolism and respiration	Rv0808	P9WHQ7	A0A0H3M4G7	56.161	4.9	20.1174	18.687	20.5902	19.8612	18.5297	19.1537	19.5259	19.4516	19.8009	20.8669	17.4985	19.3982	2	1	0	2	1	0	2	1	1	1	0	2	1	0	8.0623
MTCA1_MYCTU Beta-carbonic anhydrase 1 OS=Mycobacterium tuberculosis (strain ATCC 25618 / H37Rv) GN=mtcA1 PE=1 SV=1;A0A0H3M4G8_MYCBP Carbonic anhydrase OS=Mycobacterium bovis (strain BCG / Pasteur 1173P2) GN=canA PE=3 SV=1	intermediary metabolism and respiration	Rv1284	P9WPJ7	A0A0H3M4G8	18.189	44.2	19.8991	19.4712	19.4191	18.1245	19.5856	17.1187	19.3391	20.7067	19.469	19.6414	20.1664	20.1244	5	2	0	4	0	5	0	0	0	0	0	3	3	0	20.181
Y3118_MYCTU Uncharacterized protein Rv3118 OS=Mycobacterium tuberculosis (strain ATCC 25618 / H37Rv) GN=sseC1 PE=1 SV=1;Y814_MYCTU Uncharacterized protein Rv0814c OS=Mycobacterium tuberculosis (strain ATCC 25618 / H37Rv) GN=sseC2 PE=1 SV=1;A0A0H3M4H2_MYCBP	intermediary metabolism and respiration	Rv3118	P0CG96	P0CG95	10.165	92	24.9866	25.5591	25.2454	23.0886	27.9803	26.225	25.8681	24.7949	25.47	24.2125	26.3745	28.3455	6	6	5	6	5	6	5	6	6	5	4	5	6	0	285.4
A0A0H3M4H4_MYCBP Macrolide-transport ATP-binding protein ABC transporter OS=Mycobacterium bovis (strain BCG / Pasteur 1173P2) GN=BCG_1706c PE=4 SV=1;O53916_MYCTU Probable first part of macrolide-transport ATP-binding protein ABC transporter OS=Mycobacteriu	cell wall and cell processes	Rv1667c/Rv1668c	A0A0H3M4H4	O53916	65.021	13	21.7754	21.1653	21.3756	22.6822	17.2156	22.264	18.7292	21.5431	21.3556	21.4316	20.5038	18.5502	4	2	1	3	3	1	2	1	2	1	1	2	0	0	30.375
THRC_MYCTU Threonine synthase OS=Mycobacterium tuberculosis (strain ATCC 25618 / H37Rv) GN=thrC PE=1 SV=1;A0A0H3M4H7_MYCBP Threonine synthase OS=Mycobacterium bovis (strain BCG / Pasteur 1173P2) GN=thrC PE=3 SV=1	intermediary metabolism and respiration	Rv1295	P9WG59	A0A0H3M4H7	37.321	65.8	22.3581	25.1977	23.244	22.3828	21.7937	22.9781	25.631	22.6788	23.6382	23.84	24.6758	23.9597	14	6	7	8	7	10	7	3	7	5	6	10	7	0	123.37
O53836_MYCTU Conserved protein OS=Mycobacterium tuberculosis (strain ATCC 25618 / H37Rv) GN=Rv0825c PE=1 SV=3;A0A0H3M4I1_MYCBP Uncharacterized protein OS=Mycobacterium bovis (strain BCG / Pasteur 1173P2) GN=BCG_0878c PE=4 SV=1	Conserved hypotheticals	Rv0825c	O53836	A0A0H3M4I1	23.442	27.7	18.1085	22.1967	18.1843	22.5425	20.6436	22.9962	19.5522	21.815	18.763	21.7842	22.1145	18.4704	4	2	2	2	3	3	3	1	2	1	2	3	1	0	17.212
O33185_MYCTU Possible bifunctional enzyme long-chain acyl-CoA synthase and lipase OS=Mycobacterium tuberculosis (strain ATCC 25618 / H37Rv) GN=Rv1683 PE=1 SV=3;A0A0H3M4I3_MYCBP Possible long-chain acyl-CoA synthase OS=Mycobacterium bovis (strain BCG / Past	lipid metabolism	Rv1683	O33185	A0A0H3M4I3	107.39	35.5	22.9762	24.3038	24.5178	25.2313	22.3816	23.8529	22.3131	23.4828	23.9302	23.0473	23.2093	22.9191	22	4	8	11	10	9	8	3	8	6	5	12	13	0	138.25
O53842_MYCTU Conserved protein OS=Mycobacterium tuberculosis (strain ATCC 25618 / H37Rv) GN=Rv0831c PE=1 SV=3;A0A0H3M4I5_MYCBP Uncharacterized protein OS=Mycobacterium bovis (strain BCG / Pasteur 1173P2) GN=BCG_0884c PE=4 SV=1	Conserved hypotheticals	Rv0831c	O53842	A0A0H3M4I5	30.189	79.3	25.9852	27.2341	26.8209	26.598	26.8423	26.9021	27.4079	26.4424	27.5144	27.1822	26.8784	26.8149	13	9	7	10	8	9	9	6	6	10	5	8	12	0	180.49
SYY_MYCTU Tyrosine--tRNA ligase OS=Mycobacterium tuberculosis (strain ATCC 25618 / H37Rv) GN=tyrS PE=1 SV=1;A0A0H3M4I7_MYCBP Tyrosine--tRNA ligase OS=Mycobacterium bovis (strain BCG / Pasteur 1173P2) GN=tyrS PE=3 SV=1	information pathways	Rv1689	P9WFT1	A0A0H3M4I7	46.33	33.3	18.2863	23.2457	22.7944	23.2035	16.2367	22.0862	22.5466	22.6201	19.2319	22.4256	21.7984	19.4902	7	1	3	3	4	1	5	2	3	1	2	3	2	0	59.357
I6X235_MYCTU ADP-ribose pyrophosphatase OS=Mycobacterium tuberculosis (strain ATCC 25618 / H37Rv) GN=Rv1700 PE=1 SV=1;A0A0H3M4J6_MYCBP Uncharacterized protein OS=Mycobacterium bovis (strain BCG / Pasteur 1173P2) GN=BCG_1738 PE=4 SV=1	information pathways	Rv1700	I6X235	A0A0H3M4J6	22.893	23.2	23.6038	23.3429	18.3044	22.0753	17.2526	22.3615	23.0572	22.5013	23.4783	23.2472	18.2794	23.5582	2	1	2	1	2	1	2	2	1	2	2	1	1	0	66.316
PHSG_MYCTU Glycogen phosphorylase OS=Mycobacterium tuberculosis (strain ATCC 25618 / H37Rv) GN=glgP PE=1 SV=1;A0A0H3M4J8_MYCBP Probable glycogen phosphorylase glgP OS=Mycobacterium bovis (strain BCG / Pasteur 1173P2) GN=glgP PE=4 SV=1	intermediary metabolism and respiration	Rv1328	P9WMW1	A0A0H3M4J8	95.514	46	26.1374	25.0939	25.0141	25.7503	23.4405	24.9958	24.0948	25.452	25.8821	24.8083	25.4864	24.5525	24	10	11	18	13	13	10	5	9	8	9	22	15	0	172.68
NTPA_MYCTU Non-canonical purine NTP pyrophosphatase OS=Mycobacterium tuberculosis (strain ATCC 25618 / H37Rv) GN=Rv1341 PE=1 SV=1;A0A0H3M4K7_MYCBP dITP/XTP pyrophosphatase OS=Mycobacterium bovis (strain BCG / Pasteur 1173P2) GN=BCG_1403 PE=3 SV=1	Conserved hypotheticals	Rv1341	P9WMR7	A0A0H3M4K7	21.016	48	21.416	22.0827	20.8619	21.4028	21.3319	21.5664	22.0975	21.826	19.2198	21.8906	22.7915	20.7575	5	2	2	3	2	5	3	2	2	1	2	4	2	0	24.592
VPB12_MYCTU Putative antitoxin VapB12 OS=Mycobacterium tuberculosis (strain ATCC 25618 / H37Rv) GN=vapB12 PE=1 SV=1;A0A0H3M4L2_MYCBP Uncharacterized protein OS=Mycobacterium bovis (strain BCG / Pasteur 1173P2) GN=BCG_1760c PE=4 SV=1	virulence, detoxification and adaptation	Rv1721c	P9WJ53	A0A0H3M4L2	8.2263	49.3	21.2306	19.5385	20.9565	17.9665	21.875	22.4026	22.6763	18.7654	21.2927	19.7408	22.4639	22.4842	3	3	1	3	1	3	2	2	1	3	1	3	2	0	67.827
I6XWF9_MYCTU Uncharacterized protein OS=Mycobacterium tuberculosis (strain ATCC 25618 / H37Rv) GN=Rv0863 PE=1 SV=1;A0A0H3M4L3_MYCBP Uncharacterized protein OS=Mycobacterium bovis (strain BCG / Pasteur 1173P2) GN=BCG_0915 PE=4 SV=1	Conserved hypotheticals	Rv0863	I6XWF9	A0A0H3M4L3	10.111	57	28.5633	29.6648	28.6302	28.8298	27.0998	30.1163	30.2671	28.1205	30.0004	29.8621	28.9995	27.8506	2	2	2	2	2	2	2	2	1	2	1	2	2	0	59.733
Y873_MYCTU Probable acyl-CoA dehydrogenase FadE10 OS=Mycobacterium tuberculosis (strain ATCC 25618 / H37Rv) GN=fadE10 PE=1 SV=1;A0A0H3M4M1_MYCBP Probable acyl-CoA dehydrogenase fadE10 OS=Mycobacterium bovis (strain BCG / Pasteur 1173P2) GN=fadE10 PE=3 SV=1	lipid metabolism	Rv0873	P9WQF7	A0A0H3M4M1	70.744	44.8	24.1984	23.2001	24.7404	24.2118	23.149	23.2284	21.8936	23.0557	24.4941	22.7303	22.9332	21.93	20	4	4	12	8	15	7	3	4	6	3	8	5	0	187.5
Y883_MYCTU Uncharacterized protein Rv0883c OS=Mycobacterium tuberculosis (strain ATCC 25618 / H37Rv) GN=Rv0883c PE=1 SV=1;A0A0H3M4N1_MYCBP Uncharacterized protein OS=Mycobacterium bovis (strain BCG / Pasteur 1173P2) GN=BCG_0935c PE=4 SV=1	Conserved hypotheticals	Rv0883c	P9WKQ7	A0A0H3M4N1	27.373	30.4	19.9167	20.1116	20.1646	20.3354	20.3356	21.2333	20.3245	20.3413	19.8181	18.8879	19.7742	19.1708	8	3	2	2	3	6	3	2	2	0	1	4	1	0	30.001
A0A0H3M4N6_MYCBP Probable cutinase cut1 OS=Mycobacterium bovis (strain BCG / Pasteur 1173P2) GN=cut1 PE=4 SV=1;O06793_MYCTU Probable cutinase Cut1 OS=Mycobacterium tuberculosis (strain ATCC 25618 / H37Rv) GN=cut1 PE=4 SV=1	cell wall and cell processes	Rv1758	A0A0H3M4N6	O06793	21.999	41.7	18.6677	22.072	20.2408	18.6559	16.7796	21.2158	19.3453	19.8919	19.4205	18.5517	22.9554	22.744	3	1	2	1	1	1	3	2	1	0	1	2	2	0	13.564
PRRB_MYCTU Sensor-type histidine kinase PrrB OS=Mycobacterium tuberculosis (strain ATCC 25618 / H37Rv) GN=prrB PE=1 SV=1;A0A0H3M4P2_MYCBP Two component sensor histidine kinase prrB OS=Mycobacterium bovis (strain BCG / Pasteur 1173P2) GN=prrB PE=4 SV=1	Regulatory proteins	Rv0902c	P9WGK7	A0A0H3M4P2	47.829	19.3	19.4273	19.732	17.3873	21.4273	17.9446	22.3551	20.0833	21.1933	21.5065	21.401	20.5228	18.2332	4	1	1	1	3	2	3	0	3	1	2	3	0	0	41.069
O53931_MYCTU Conserved protein OS=Mycobacterium tuberculosis (strain ATCC 25618 / H37Rv) GN=Rv1780 PE=1 SV=1;A0A0H3M4P8_MYCBP Uncharacterized protein OS=Mycobacterium bovis (strain BCG / Pasteur 1173P2) GN=BCG_1813 PE=4 SV=1	Conserved hypotheticals	Rv1780	O53931	A0A0H3M4P8	20.456	44.9	20.4918	19.433	20.3773	19.3719	21.8856	18.1868	19.0972	18.8929	19.052	19.481	22.5028	21.6269	8	3	1	4	1	4	0	1	1	2	1	7	6	0	27.955
VPB10_MYCTU Putative antitoxin VapB10 OS=Mycobacterium tuberculosis (strain ATCC 25618 / H37Rv) GN=vapB10 PE=1 SV=1;A0A0H3M4Q1_MYCBP Uncharacterized protein OS=Mycobacterium bovis (strain BCG / Pasteur 1173P2) GN=BCG_1459c PE=4 SV=1	virulence, detoxification and adaptation	Rv1398c	P9WLZ1	A0A0H3M4Q1	9.4435	64.7	18.9967	24.5105	21.7171	18.9492	23.4197	21.8143	25.2151	18.9696	19.3954	21.2099	23.0697	20.5497	4	1	1	3	0	4	2	1	0	1	1	2	1	0	46.919
A0A0H3M4R1_MYCBP Riboflavin biosynthesis protein RibD OS=Mycobacterium bovis (strain BCG / Pasteur 1173P2) GN=ribG PE=3 SV=1;RIBD_MYCTU Riboflavin biosynthesis protein RibD OS=Mycobacterium tuberculosis (strain ATCC 25618 / H37Rv) GN=ribD PE=1 SV=1	intermediary metabolism and respiration	Rv1409	A0A0H3M4R1	P9WPH1	35.382	30.7	19.1182	22.1692	21.785	21.4566	20.6586	21.5013	19.5754	18.6072	22.0561	20.2996	23.5411	20.8287	6	1	2	3	2	5	2	1	1	2	1	3	2	0	27.742
MYCP5_MYCTU Mycosin-5 OS=Mycobacterium tuberculosis (strain ATCC 25618 / H37Rv) GN=mycP5 PE=1 SV=1;A0A0H3M4R2_MYCBP Conserved hypothetical pro-rich protease OS=Mycobacterium bovis (strain BCG / Pasteur 1173P2) GN=BCG_1828 PE=4 SV=1	intermediary metabolism and respiration	Rv1796	O53945	A0A0H3M4R2	60.027	34.2	18.3454	23.3978	22.8222	23.8822	22.9287	24.9072	19.5105	22.3753	23.0856	22.9013	23.8069	22.9219	12	2	2	5	7	11	5	1	4	2	4	6	4	0	80.411
Y927C_MYCTU Uncharacterized oxidoreductase Rv0927c OS=Mycobacterium tuberculosis (strain ATCC 25618 / H37Rv) GN=Rv0927c PE=1 SV=1;A0A0H3M4R4_MYCBP Putative short-chain type dehydrogenase/reductase OS=Mycobacterium bovis (strain BCG / Pasteur 1173P2) GN=BCG	intermediary metabolism and respiration	Rv0927c	P9WGQ5	A0A0H3M4R4	26.745	79.5	22.9007	25.1861	22.5037	21.686	22.3865	23.0639	24.4115	22.7105	23.237	24.4116	24.5244	23.6509	11	3	5	4	6	6	5	3	2	3	4	6	5	0	120.4
A0A0H3M4R6_MYCBP 6,7-dimethyl-8-ribityllumazine synthase OS=Mycobacterium bovis (strain BCG / Pasteur 1173P2) GN=ribH PE=3 SV=1;RISB_MYCTU 6,7-dimethyl-8-ribityllumazine synthase OS=Mycobacterium tuberculosis (strain ATCC 25618 / H37Rv) GN=ribH PE=1 SV=1	intermediary metabolism and respiration	Rv1416	A0A0H3M4R6	P9WHE9	15.901	71.4	21.4963	22.4899	21.8867	22.7312	22.0222	23.0099	22.2733	23.7302	22.1863	22.8613	23.0934	21.6099	7	4	4	5	3	4	5	2	2	3	2	4	6	0	82.652
A0A0H3M4R9_MYCBP Transmembrane serine/threonine-protein kinase D pknDa [first part] OS=Mycobacterium bovis (strain BCG / Pasteur 1173P2) GN=pknDa PE=4 SV=1	Regulatory proteins		A0A0H3M4R9		31.428	70.8	24.1929	23.6022	22.97	24.7688	21.5424	25.7963	24.4517	24.1758	24.2173	24.5521	24.0086	23.8352	1	1	1	1	1	1	1	1	1	1	1	1	1	0	218.91
Y940_MYCTU Uncharacterized protein Rv0940c OS=Mycobacterium tuberculosis (strain ATCC 25618 / H37Rv) GN=Rv0940c PE=1 SV=1;A0A0H3M4T3_MYCBP Possible oxidoreductase OS=Mycobacterium bovis (strain BCG / Pasteur 1173P2) GN=BCG_0994c PE=4 SV=1	intermediary metabolism and respiration	Rv0940c	P9WKP1	A0A0H3M4T3	31.788	50	23.5187	22.9925	24.1434	23.4783	20.5932	22.9476	22.8242	23.2054	24.4004	23.2631	22.4842	22.5376	10	4	6	6	6	5	7	5	6	6	5	7	5	0	52.538
A0A0H3M4T8_MYCBP Putative OXPP cycle protein opcA OS=Mycobacterium bovis (strain BCG / Pasteur 1173P2) GN=opcA PE=4 SV=1;O06813_MYCTU Oxidoreductase OS=Mycobacterium tuberculosis (strain ATCC 25618 / H37Rv) GN=opcA PE=1 SV=1	intermediary metabolism and respiration	Rv1446c	A0A0H3M4T8	O06813	32.658	55.4	22.2754	23.4103	22.3039	22.8879	22.0636	23.4716	24.2182	22.443	23.0076	22.4041	24.6267	22.2079	10	4	3	8	1	9	5	2	1	2	1	7	2	0	118.07
Y945_MYCTU Uncharacterized oxidoreductase Rv0945 OS=Mycobacterium tuberculosis (strain ATCC 25618 / H37Rv) GN=Rv0945 PE=1 SV=1;A0A0H3M4T9_MYCBP Putative short-chain type dehydrogenase/reductase OS=Mycobacterium bovis (strain BCG / Pasteur 1173P2) GN=BCG_09	intermediary metabolism and respiration	Rv0945	P9WGR7	A0A0H3M4T9	27.138	14.6	20.7204	19.3317	21.0611	20.3373	18.3859	19.4693	19.1614	19.8535	19.2485	19.4312	20.1817	19.847	3	1	2	2	2	1	1	1	1	2	1	1	2	0	5.6161
BACA_MYCTU Vitamin B12 transport ATP-binding protein BacA OS=Mycobacterium tuberculosis (strain ATCC 25618 / H37Rv) GN=bacA PE=1 SV=1;A0A0H3M4U0_MYCBP Probable drugs-transport transmembrane ATP-binding protein ABC transporter OS=Mycobacterium bovis (strain	cell wall and cell processes	Rv1819c	P9WQI9	A0A0H3M4U0	71.316	30.8	24.2549	19.7549	25.6468	23.9433	20.0417	22.6215	19.2897	18.2189	23.1745	21.4535	17.9303	24.3964	11	2	1	5	5	6	5	0	1	2	3	2	3	0	81.197
Y1825_MYCTU UPF0749 protein Rv1825 OS=Mycobacterium tuberculosis (strain ATCC 25618 / H37Rv) GN=Rv1825 PE=1 SV=1;A0A0H3M4U3_MYCBP Uncharacterized protein OS=Mycobacterium bovis (strain BCG / Pasteur 1173P2) GN=BCG_1860 PE=4 SV=1	Conserved hypotheticals	Rv1825	P9WFG3	A0A0H3M4U3	30.645	38.4	22.5388	24.4378	18.4139	19.091	20.9951	22.7557	24.4267	21.0782	19.0085	20.7827	22.2762	20.5297	6	2	3	1	2	4	4	4	2	1	3	3	2	0	62.076
A0A0H3M4U6_MYCBP Succinate--CoA ligase [ADP-forming] subunit alpha OS=Mycobacterium bovis (strain BCG / Pasteur 1173P2) GN=sucD PE=3 SV=1;SUCD_MYCTU Succinate--CoA ligase [ADP-forming] subunit alpha OS=Mycobacterium tuberculosis (strain ATCC 25618 / H37Rv)	intermediary metabolism and respiration	Rv0952	A0A0H3M4U6	P9WGC7	31.201	54.8	24.112	24.377	24.4329	24.6548	25.1699	23.969	24.0951	24.3913	24.0335	24.1429	25.3326	25.2754	12	8	7	10	8	9	11	7	8	6	6	12	11	0	219.74
O53149_MYCTU Probable unidentified antibiotic-transport ATP-binding protein ABC transporter OS=Mycobacterium tuberculosis (strain ATCC 25618 / H37Rv) GN=Rv1458c PE=1 SV=1;A0A0H3M4V0_MYCBP Probable unidentified antibiotic-transport ATP-binding protein ABC t	cell wall and cell processes	Rv1458c	O53149	A0A0H3M4V0	33.758	27.8	21.5433	22.9172	23.2281	21.5557	17.4887	22.9866	21.4161	19.3403	22.3156	19.2941	23.685	22.3258	5	2	2	4	3	2	3	1	1	3	1	4	2	0	65.756
A0A0H3M4V4_MYCBP Possible magnesium chelatase OS=Mycobacterium bovis (strain BCG / Pasteur 1173P2) GN=BCG_1012 PE=4 SV=1;P71552_MYCTU Magnesium chelatase OS=Mycobacterium tuberculosis (strain ATCC 25618 / H37Rv) GN=Rv0958 PE=1 SV=1	intermediary metabolism and respiration	Rv0958	A0A0H3M4V4	P71552	49.591	36.6	23.7007	24.2967	23.5813	23.2143	22.2908	24.2612	24.8085	23.1082	24.5712	23.6884	25.0908	23.0385	9	4	4	7	5	7	7	3	4	4	4	8	8	0	172.71
Y1843_MYCTU Uncharacterized oxidoreductase Rv1843c OS=Mycobacterium tuberculosis (strain ATCC 25618 / H37Rv) GN=guaB1 PE=1 SV=1;A0A0H3M4V5_MYCBP Probable inosine-5-monophosphate dehydrogenase guaB1 OS=Mycobacterium bovis (strain BCG / Pasteur 1173P2) GN=g	intermediary metabolism and respiration	Rv1843c	P9WKI3	A0A0H3M4V5	49.964	42.8	21.7359	24.0638	22.3947	21.5317	20.8795	23.1419	23.8358	21.8884	22.9552	22.6825	24.4576	22.7495	11	5	6	7	6	6	7	3	2	4	3	10	7	0	108.41
O53154_MYCTU Cysteine desulfurase OS=Mycobacterium tuberculosis (strain ATCC 25618 / H37Rv) GN=sufC PE=1 SV=1;A0A0H3M4V8_MYCBP Probable conserved ATP-binding protein ABC transporter OS=Mycobacterium bovis (strain BCG / Pasteur 1173P2) GN=BCG_1524 PE=4 SV=1	cell wall and cell processes	Rv1463	O53154	A0A0H3M4V8	28.822	73.3	26.8034	25.3509	26.8108	26.6517	23.6079	26.6053	25.634	26.6974	25.6491	26.4228	25.4526	25.0676	13	8	7	10	8	8	8	8	8	11	6	10	10	0	286.36
Y968_MYCTU Uncharacterized protein Rv0968 OS=Mycobacterium tuberculosis (strain ATCC 25618 / H37Rv) GN=Rv0968 PE=1 SV=1;A0A0H3M4W6_MYCBP Uncharacterized protein OS=Mycobacterium bovis (strain BCG / Pasteur 1173P2) GN=BCG_1022 PE=4 SV=1	Conserved hypotheticals	Rv0968	P9WKL9	A0A0H3M4W6	10.264	61.2	18.9892	18.9889	18.0407	18.9227	18.7235	18.9752	20.0415	20.1011	18.8859	18.8512	19.2423	18.3215	5	3	3	3	3	4	2	2	3	3	1	4	4	0	16.497
P71538_MYCTU Acetyl-CoA carboxylase subunit alpha OS=Mycobacterium tuberculosis (strain ATCC 25618 / H37Rv) GN=accA2 PE=1 SV=2;A0A0H3M4X1_MYCBP Probable acetyl-/propionyl-coenzyme A carboxylase alpha chain (Alpha subunit) accA2 OS=Mycobacterium bovis (stra	lipid metabolism	Rv0973c	P71538	A0A0H3M4X1	70.744	4.8	18.3025	19.5638	18.069	19.6341	15.9288	17.761	18.1377	19.4057	19.9418	19.5676	17.7836	17.8713	3	0	0	0	2	3	2	0	2	0	1	2	0	0	6.4527
A0A0H3M4X4_MYCBP Probable reductase OS=Mycobacterium bovis (strain BCG / Pasteur 1173P2) GN=BCG_1905c PE=4 SV=1;P95146_MYCTU Probable reductase OS=Mycobacterium tuberculosis (strain ATCC 25618 / H37Rv) GN=Rv1869c PE=1 SV=1	intermediary metabolism and respiration	Rv1869c	A0A0H3M4X4	P95146	43.639	56.7	23.7277	25.3462	24.4769	24.0322	23.7821	24.4485	24.9499	24.4363	24.6807	25.473	26.2097	25.1181	14	11	9	14	10	11	11	8	7	8	7	13	12	0	179.85
A0A0H3M4Y1_MYCBP Probable adhesion component transport atp-binding protein ABC transporter OS=Mycobacterium bovis (strain BCG / Pasteur 1173P2) GN=BCG_1041 PE=4 SV=1;Y986_MYCTU Uncharacterized ABC transporter ATP-binding protein Rv0986 OS=Mycobacterium tub	cell wall and cell processes	Rv0986	A0A0H3M4Y1	P9WQK1	27.387	47.6	23.7486	23.6609	24.3388	23.671	24.4209	24.4033	24.3751	23.9979	24.0953	23.5176	18.059	19.2643	7	5	3	4	5	4	4	2	5	3	3	2	0	0	60.067
FABG_MYCTU 3-oxoacyl-[acyl-carrier-protein] reductase FabG1 OS=Mycobacterium tuberculosis (strain ATCC 25618 / H37Rv) GN=fabG1 PE=1 SV=1;A0A0H3M4Y2_MYCBP Probable 3-oxoacyl-[acyl-carrier protein] reductase fabG1 OS=Mycobacterium bovis (strain BCG / Pasteur	lipid metabolism	Rv1483	P9WGT3	A0A0H3M4Y2	25.697	76.9	21.2545	23.2811	20.9869	23.7462	22.5856	22.0373	19.7661	23.7753	22.1984	23.6815	22.8611	23.5399	11	4	3	7	9	8	5	1	6	4	3	4	7	0	157.54
O05574_MYCTU Conserved serine rich protein OS=Mycobacterium tuberculosis (strain ATCC 25618 / H37Rv) GN=Rv0991c PE=1 SV=3;A0A0H3M4Y6_MYCBP Conserved hypothetical serine rich protein OS=Mycobacterium bovis (strain BCG / Pasteur 1173P2) GN=BCG_1046c PE=4 SV=	Conserved hypotheticals	Rv0991c	O05574	A0A0H3M4Y6	11.458	36.4	24.2548	18.7888	24.1488	18.2699	23.7544	23.9959	24.5523	20.0034	19.443	19.8475	25.2645	22.4382	3	2	1	2	1	3	2	2	1	1	1	2	2	0	47.103
L7N692_MYCTU Conserved protein OS=Mycobacterium tuberculosis (strain ATCC 25618 / H37Rv) GN=Rv1489 PE=1 SV=1;A0A0H3M4Y7_MYCBP Uncharacterized protein OS=Mycobacterium bovis (strain BCG / Pasteur 1173P2) GN=BCG_1551 PE=4 SV=1	Conserved hypotheticals	Rv1489	L7N692	A0A0H3M4Y7	12.306	28.8	25.9418	22.7457	23.7663	23.8972	19.149	21.4498	21.4463	24.0451	23.2256	22.8745	20.8305	24.2697	3	1	2	2	3	2	1	2	3	2	2	2	3	0	17.39
O07748_MYCTU Uncharacterized protein OS=Mycobacterium tuberculosis (strain ATCC 25618 / H37Rv) GN=Rv1883c PE=1 SV=1;A0A0H3M4Y9_MYCBP Uncharacterized protein OS=Mycobacterium bovis (strain BCG / Pasteur 1173P2) GN=BCG_1920c PE=4 SV=1	Conserved hypotheticals	Rv1883c	O07748	A0A0H3M4Y9	17.281	50.3	23.5489	22.4608	23.7945	23.6168	21.9967	23.494	22.6093	23.4373	23.3224	23.2591	22.9494	21.8821	5	5	4	4	4	4	4	3	3	4	3	5	5	0	32.258
MUTB_MYCTU Probable methylmalonyl-CoA mutase large subunit OS=Mycobacterium tuberculosis (strain ATCC 25618 / H37Rv) GN=mutB PE=1 SV=1;A0A0H3M4Z3_MYCBP Probable methylmalonyl-COA mutase large subunit mutB OS=Mycobacterium bovis (strain BCG / Pasteur 1173P2	lipid metabolism	Rv1493	P9WJK5	A0A0H3M4Z3	80.603	31.2	25.3932	24.3435	25.0607	24.4423	21.2103	24.4255	23.7165	24.0075	25.0986	23.5913	24.0786	22.4098	14	7	6	11	9	8	9	5	8	5	8	9	6	0	161.28
O07739_MYCTU Uncharacterized protein OS=Mycobacterium tuberculosis (strain ATCC 25618 / H37Rv) GN=Rv1893 PE=1 SV=1;A0A0H3M4Z6_MYCBP Uncharacterized protein OS=Mycobacterium bovis (strain BCG / Pasteur 1173P2) GN=BCG_1931 PE=4 SV=1	Conserved hypotheticals	Rv1893	O07739	A0A0H3M4Z6	7.4671	63.9	17.2984	17.2553	17.1045	15.1008	23.2017	18.5565	17.4112	15.9864	18.1539	18.4498	18.3804	17.3873	4	4	2	4	2	4	4	3	3	2	0	4	3	0	30.115
O05582_MYCTU Uncharacterized protein OS=Mycobacterium tuberculosis (strain ATCC 25618 / H37Rv) GN=Rv0999 PE=1 SV=1;A0A0H3M4Z9_MYCBP Uncharacterized protein OS=Mycobacterium bovis (strain BCG / Pasteur 1173P2) GN=BCG_1056 PE=4 SV=1	Conserved hypotheticals	Rv0999	O05582	A0A0H3M4Z9	25.969	47.2	22.6279	19.3895	21.9547	22.242	22.2014	22.0118	21.1252	22.5242	19.3231	18.7549	23.0584	21.953	9	3	0	5	4	6	5	1	1	1	2	5	4	0	23.545
A0A0H3M501_MYCBP Possible lipoprotein lppD OS=Mycobacterium bovis (strain BCG / Pasteur 1173P2) GN=lppD PE=4 SV=1;Y1899_MYCTU Uncharacterized protein Rv1899c OS=Mycobacterium tuberculosis (strain ATCC 25618 / H37Rv) GN=Rv1899c PE=1 SV=1	cell wall and cell processes	Rv1899c	A0A0H3M501	P9WK29	36.405	29.1	20.2785	19.4325	17.6704	21.66	22.4662	22.9319	19.3555	21.3947	18.7669	21.734	21.3334	21.5598	6	1	1	1	3	3	3	1	3	1	3	4	3	0	69.67
A0A0H3M506_MYCBP Putative D-amino acid oxidase aao OS=Mycobacterium bovis (strain BCG / Pasteur 1173P2) GN=aao PE=4 SV=1;DAO_MYCTU Probable D-amino-acid oxidase OS=Mycobacterium tuberculosis (strain ATCC 25618 / H37Rv) GN=aao PE=1 SV=1	intermediary metabolism and respiration	Rv1905c	A0A0H3M506	P9WP27	34.112	37.2	21.188	20.7961	20.7035	21.4034	18.3031	21.9379	21.1378	21.2766	21.4458	21.2688	21.1764	17.6727	8	2	2	2	4	4	4	2	2	3	2	3	1	0	51.835
LPPC_MYCTU Putative lipoprotein LppC OS=Mycobacterium tuberculosis (strain ATCC 25618 / H37Rv) GN=lppC PE=1 SV=2;A0A0H3M510_MYCBP Probable lipoprotein lppC OS=Mycobacterium bovis (strain BCG / Pasteur 1173P2) GN=lppC PE=4 SV=1	cell wall and cell processes	Rv1911c	P9WFN3	A0A0H3M510	19.798	25.9	25.6566	23.714	25.5359	25.6743	20.4668	27.1178	23.4353	26.1843	24.6472	25.2886	21.965	24.0363	2	2	2	2	2	1	2	2	2	2	2	2	1	0	38.282
P96375_MYCTU Conserved protein OS=Mycobacterium tuberculosis (strain ATCC 25618 / H37Rv) GN=Rv1025 PE=1 SV=4;A0A0H3M517_MYCBP Uncharacterized protein OS=Mycobacterium bovis (strain BCG / Pasteur 1173P2) GN=BCG_1082 PE=4 SV=1	Conserved hypotheticals	Rv1025	P96375	A0A0H3M517	16.625	63.2	23.9966	24.8382	23.4716	24.8775	24.4529	24.1932	25.5308	25.0607	24.5212	23.5333	24.6122	22.0823	7	3	3	4	3	6	5	2	3	2	3	5	2	0	104.07
P95291_MYCTU Probable conserved lipoprotein OS=Mycobacterium tuberculosis (strain ATCC 25618 / H37Rv) GN=Rv1922 PE=1 SV=1;A0A0H3M519_MYCBP Probable conserved lipoprotein OS=Mycobacterium bovis (strain BCG / Pasteur 1173P2) GN=BCG_1961 PE=4 SV=1	cell wall and cell processes	Rv1922	P95291	A0A0H3M519	39.062	6.5	19.7491	18.6839	18.7278	19.6822	17.1567	20.4036	20.2258	19.733	20.3257	20.4775	19.3611	19.4365	2	1	1	0	2	0	1	1	1	1	1	2	0	0	3.776
O08377_MYCTU Probable transcriptional regulator OS=Mycobacterium tuberculosis (strain ATCC 25618 / H37Rv) GN=Rv1534 PE=1 SV=1;A0A0H3M525_MYCBP Probable transcriptional regulator OS=Mycobacterium bovis (strain BCG / Pasteur 1173P2) GN=BCG_1586 PE=4 SV=1	Regulatory proteins	Rv1534	O08377	A0A0H3M525	24.501	7.1	18.3732	18.7068	20.5793	20.1752	19.2851	18.7793	19.0557	19.5848	19.6787	20.1942	17.7588	19.014	1	1	1	1	1	0	1	1	1	1	1	1	1	0	17.871
TPX_MYCTU Probable thiol peroxidase OS=Mycobacterium tuberculosis (strain ATCC 25618 / H37Rv) GN=tpx PE=1 SV=1;A0A0H3M528_MYCBP Probable thiol peroxidase OS=Mycobacterium bovis (strain BCG / Pasteur 1173P2) GN=tpx PE=3 SV=1	virulence, detoxification and adaptation	Rv1932	P9WG35	A0A0H3M528	16.896	69.7	26.8257	28.1993	26.4713	26.8648	27.3294	27.8838	28.6966	27.0181	27.1574	29.1968	28.6062	27.23	6	4	4	5	5	6	6	5	5	5	4	5	5	0	185.45
SECBL_MYCTU SecB-like chaperone Rv1957 OS=Mycobacterium tuberculosis (strain ATCC 25618 / H37Rv) GN=secBL PE=1 SV=1;A0A0H3M548_MYCBP Uncharacterized protein OS=Mycobacterium bovis (strain BCG / Pasteur 1173P2) GN=BCG_1996 PE=4 SV=1	Conserved hypotheticals	Rv1957	P95257	A0A0H3M548	20.106	45.3	23.4457	23.4214	21.8879	24.0011	24.4313	24.0885	19.8956	23.926	23.1696	23.6105	18.3429	19.2574	6	2	2	4	3	5	2	1	3	2	3	1	1	0	24.638
Y1993_MYCTU Uncharacterized protein Rv1993c OS=Mycobacterium tuberculosis (strain ATCC 25618 / H37Rv) GN=Rv1993c PE=1 SV=1;A0A0H3M561_MYCBP Uncharacterized protein OS=Mycobacterium bovis (strain BCG / Pasteur 1173P2) GN=BCG_2010c PE=4 SV=1	Conserved hypotheticals	Rv1993c	P9WLP5	A0A0H3M561	9.3657	67.8	18.6744	19.0357	18.3208	19.2075	19.8246	18.9982	20.137	20.7494	20.6005	20.7526	19.9416	20.9652	5	1	0	2	3	5	3	1	2	2	2	5	3	0	25.026
A0A0H3M564_MYCBP Histidinol dehydrogenase OS=Mycobacterium bovis (strain BCG / Pasteur 1173P2) GN=hisD PE=3 SV=1;HISX_MYCTU Histidinol dehydrogenase OS=Mycobacterium tuberculosis (strain ATCC 25618 / H37Rv) GN=hisD PE=1 SV=2	intermediary metabolism and respiration	Rv1599	A0A0H3M564	P9WNW9	45.378	24.4	17.3101	18.5953	20.4864	18.1682	19.0314	20.7763	19.3633	18.6369	18.8717	18.9888	22.907	21.8764	6	1	0	4	1	4	2	1	1	1	1	3	3	0	59.801
Y1998_MYCTU Uncharacterized protein Rv1998c OS=Mycobacterium tuberculosis (strain ATCC 25618 / H37Rv) GN=Rv1998c PE=1 SV=1;A0A0H3M565_MYCBP Uncharacterized protein OS=Mycobacterium bovis (strain BCG / Pasteur 1173P2) GN=BCG_2015c PE=4 SV=1	Conserved hypotheticals	Rv1998c	P9WLN9	A0A0H3M565	27.253	36.4	21.708	23.1736	21.783	20.8589	24.8652	24.175	25.0646	21.847	22.6438	22.6905	24.6103	22.3848	7	4	1	5	4	7	3	1	1	2	1	5	3	0	47.704
O53406_MYCTU Long-chain fatty acid--CoA ligase OS=Mycobacterium tuberculosis (strain ATCC 25618 / H37Rv) GN=fadD14 PE=1 SV=1;A0A0H3M566_MYCBP Probable medium chain fatty-acid-CoA ligase fadD14 OS=Mycobacterium bovis (strain BCG / Pasteur 1173P2) GN=fadD14	lipid metabolism	Rv1058	O53406	A0A0H3M566	59.624	18.2	19.343	19.1981	18.2532	18.7067	18.3076	18.8784	19.1725	18.3667	19.1211	19.2145	19.104	18.9441	8	0	0	2	2	7	2	0	1	0	0	3	1	0	25.485
Y2003_MYCTU Uncharacterized protein Rv2003c OS=Mycobacterium tuberculosis (strain ATCC 25618 / H37Rv) GN=Rv2003c PE=1 SV=1;A0A0H3M568_MYCBP Uncharacterized protein OS=Mycobacterium bovis (strain BCG / Pasteur 1173P2) GN=BCG_2020c PE=4 SV=1	Conserved hypotheticals	Rv2003c	P9WJZ5	A0A0H3M568	31.049	18.6	20.0747	22.9485	17.1767	22.9188	19.4021	21.7458	22.1537	22.293	22.4528	22.2994	20.6437	18.9198	3	1	3	1	2	2	2	2	3	2	2	3	0	0	20.694
TRPE_MYCTU Anthranilate synthase component 1 OS=Mycobacterium tuberculosis (strain ATCC 25618 / H37Rv) GN=trpE PE=1 SV=1;A0A0H3M569_MYCBP Anthranilate synthase component 1 OS=Mycobacterium bovis (strain BCG / Pasteur 1173P2) GN=trpE PE=3 SV=1	intermediary metabolism and respiration	Rv1609	P9WFX3	A0A0H3M569	55.848	27.1	19.5427	18.34	20.7899	21.8535	20.4466	21.2946	19.8472	21.3312	20.5938	20.9878	21.9495	20.5811	10	2	1	4	4	7	5	1	2	2	2	4	7	0	51.102
Y1063_MYCTU Uncharacterized NTE family protein Rv1063c OS=Mycobacterium tuberculosis (strain ATCC 25618 / H37Rv) GN=Rv1063c PE=1 SV=1;A0A0H3M570_MYCBP Uncharacterized protein OS=Mycobacterium bovis (strain BCG / Pasteur 1173P2) GN=BCG_1121c PE=4 SV=1	Conserved hypotheticals	Rv1063c	P9WIY9	A0A0H3M570	37.522	23.6	19.1064	19.575	17.3707	18.9512	19.3249	18.911	19.5039	18.1432	19.7723	19.1572	17.1325	17.6215	6	1	0	2	2	3	1	1	2	0	1	1	2	0	13.082
KPYK_MYCTU Pyruvate kinase OS=Mycobacterium tuberculosis (strain ATCC 25618 / H37Rv) GN=pyk PE=1 SV=1;A0A0H3M573_MYCBP Pyruvate kinase OS=Mycobacterium bovis (strain BCG / Pasteur 1173P2) GN=pykA PE=3 SV=1	intermediary metabolism and respiration	Rv1617	P9WKE5	A0A0H3M573	50.699	34.1	24.1727	23.3719	25.1999	24.7995	22.7078	24.2277	22.8421	24.2613	23.9926	24.1078	22.8456	22.7651	11	3	3	3	4	6	4	2	3	4	2	8	4	0	191.14
PRA_MYCTU Proline-rich antigen homolog OS=Mycobacterium tuberculosis (strain ATCC 25618 / H37Rv) GN=pra PE=1 SV=1;A0A0H3M579_MYCBP Probable Proline-rich antigen homolog pra OS=Mycobacterium bovis (strain BCG / Pasteur 1173P2) GN=pra PE=4 SV=1	Conserved hypotheticals	Rv1078	P9WIM7	A0A0H3M579	25.076	12.9	18.9532	20.323	19.2141	18.5612	22.0885	19.7079	19.7147	19.2814	19.7737	18.7441	22.2944	21.9901	2	2	2	2	1	2	2	1	0	2	0	2	2	0	12.686
O53432_MYCTU Conserved protein OS=Mycobacterium tuberculosis (strain ATCC 25618 / H37Rv) GN=Rv1084 PE=1 SV=1;A0A0H3M580_MYCBP Uncharacterized protein OS=Mycobacterium bovis (strain BCG / Pasteur 1173P2) GN=BCG_1142 PE=4 SV=1	Conserved hypotheticals	Rv1084	O53432	A0A0H3M580	71.049	5.5	22.1956	19.9327	22.3905	20.5772	18.6019	19.6761	19.3038	19.5588	20.1118	20.3092	17.7592	20.2075	3	1	1	1	3	0	1	1	3	1	1	1	1	0	57.544
VPB45_MYCTU Putative antitoxin VapB45 OS=Mycobacterium tuberculosis (strain ATCC 25618 / H37Rv) GN=vapB45 PE=1 SV=3;A0A0H3M582_MYCBP Uncharacterized protein OS=Mycobacterium bovis (strain BCG / Pasteur 1173P2) GN=BCG_2035 PE=4 SV=1	Conserved hypotheticals	Rv2018	O53464	A0A0H3M582	26.034	48.5	23.8118	22.4169	22.1977	23.8962	20.8887	24.0914	22.4534	24.1193	22.5514	23.4073	22.5563	19.4959	9	4	2	7	2	8	6	3	2	2	3	5	3	0	41.248
A0A0H3M586_MYCBP Serine hydroxymethyltransferase OS=Mycobacterium bovis (strain BCG / Pasteur 1173P2) GN=glyA1 PE=3 SV=1	Intermediary metabolism and respiration		A0A0H3M586		45.001	77.2	26.8316	26.0346	27.2069	27.0752	26.3403	26.2638	26.4503	27.2547	27.0048	26.8792	26.6161	26.544	2	1	1	1	0	2	0	0	0	1	0	1	1	0	284.62
FUMC_MYCTU Fumarate hydratase class II OS=Mycobacterium tuberculosis (strain ATCC 25618 / H37Rv) GN=fumC PE=1 SV=1;A0A0H3M589_MYCBP Fumarate hydratase class II OS=Mycobacterium bovis (strain BCG / Pasteur 1173P2) GN=fum PE=3 SV=1	intermediary metabolism and respiration	Rv1098c	P9WN93	A0A0H3M589	50.14	44.1	23.2738	23.1632	23.4922	24.1111	24.6024	24.4977	22.7669	22.9935	23.2416	23.1394	24.8784	24.2078	18	14	9	16	9	17	15	7	9	10	7	16	13	0	133.95
ACR_MYCTU Alpha-crystallin OS=Mycobacterium tuberculosis (strain ATCC 25618 / H37Rv) GN=hspX PE=1 SV=1;A0A0H3M591_MYCBP Heat shock protein hspX OS=Mycobacterium bovis (strain BCG / Pasteur 1173P2) GN=hspX PE=3 SV=1	virulence, detoxification and adaptation	Rv2031c	P9WMK1	A0A0H3M591	16.227	58.3	22.2697	25.9374	22.7322	23.1713	22.7516	25.705	22.7247	24.3704	23.0702	22.7882	23.2911	25.8022	6	4	5	1	5	3	5	3	3	2	2	3	5	0	31.316
O86351_MYCTU Uncharacterized protein OS=Mycobacterium tuberculosis (strain ATCC 25618 / H37Rv) GN=Rv1111c PE=1 SV=2;A0A0H3M597_MYCBP Uncharacterized protein OS=Mycobacterium bovis (strain BCG / Pasteur 1173P2) GN=BCG_1171c PE=4 SV=1	Conserved hypotheticals	Rv1111c	O86351	A0A0H3M597	37.016	17.1	19.6607	19.2603	21.063	21.4032	17.7552	18.5062	21.458	18.8578	19.3499	18.3365	18.1996	18.5243	4	1	0	2	2	3	1	0	1	0	0	1	0	0	10.008
O53485_MYCTU ABC transporter OS=Mycobacterium tuberculosis (strain ATCC 25618 / H37Rv) GN=Rv2041c PE=1 SV=1;A0A0H3M599_MYCBP Probable sugar-binding lipoprotein OS=Mycobacterium bovis (strain BCG / Pasteur 1173P2) GN=BCG_2060c PE=4 SV=1	cell wall and cell processes	Rv2041c	O53485	A0A0H3M599	47.876	8	20.066	18.993	18.5628	19.9963	17.0638	18.4081	18.7087	18.8639	20.5538	19.3039	19.0138	18.9609	3	1	1	2	3	0	2	0	2	0	1	2	0	0	60.474
PPMNT_MYCTU Bifunctional apolipoprotein N-acyltransferase/polyprenol monophosphomannose synthase OS=Mycobacterium tuberculosis (strain ATCC 25618 / H37Rv) GN=ppm1 PE=1 SV=1;PPMNT_MYCBP Bifunctional apolipoprotein N-acyltransferase/polyprenol monophosphoman	cell wall and cell processes	Rv2051c	O53493	A0A0H3M5A8	93.823	19.1	22.283	22.5973	23.5677	23.5938	21.3518	23.1583	20.9421	23.1081	21.8923	22.1201	23.2036	23.0544	11	5	4	8	9	5	6	2	5	3	3	5	6	0	102.11
O06149_MYCTU Uncharacterized protein OS=Mycobacterium tuberculosis (strain ATCC 25618 / H37Rv) GN=Rv1632c PE=1 SV=1;A0A0H3M5A9_MYCBP Uncharacterized protein OS=Mycobacterium bovis (strain BCG / Pasteur 1173P2) GN=BCG_1670c PE=4 SV=1	Conserved hypotheticals	Rv1632c	O06149	A0A0H3M5A9	16.63	79.6	22.6027	22.6964	22.7952	24.1163	23.2245	24.592	23.1006	23.3672	23.6294	23.9669	23.0631	22.5476	8	3	3	5	3	4	5	2	3	3	3	7	3	0	76.425
O06154_MYCTU Conserved protein OS=Mycobacterium tuberculosis (strain ATCC 25618 / H37Rv) GN=Rv1637c PE=1 SV=2;A0A0H3M5B3_MYCBP Uncharacterized protein OS=Mycobacterium bovis (strain BCG / Pasteur 1173P2) GN=BCG_1675c PE=4 SV=1	Conserved hypotheticals	Rv1637c	O06154	A0A0H3M5B3	27.936	43.2	26.251	26.8647	25.3064	25.6908	25.346	26.8236	27.14	25.3258	25.9907	25.9318	26.3144	25.1675	6	3	4	6	5	4	5	3	5	4	5	6	4	0	106.63
A0A0H3M5C1_MYCBP Phenylalanine--tRNA ligase beta subunit OS=Mycobacterium bovis (strain BCG / Pasteur 1173P2) GN=pheT PE=3 SV=1;SYFB_MYCTU Phenylalanine--tRNA ligase beta subunit OS=Mycobacterium tuberculosis (strain ATCC 25618 / H37Rv) GN=pheT PE=1 SV=1	information pathways	Rv1650	A0A0H3M5C1	P9WFU1	88.401	38.3	24.1971	24.1028	24.1636	25.5915	22.5258	24.8676	24.2521	25.1081	24.7919	23.4154	25.0282	23.9686	20	7	6	10	10	8	12	3	8	2	2	15	8	0	194.57
I6XYM2_MYCTU Probable conserved lipoprotein DsbF OS=Mycobacterium tuberculosis (strain ATCC 25618 / H37Rv) GN=dsbF PE=1 SV=1;A0A0H3M5E1_MYCBP Probable conserved lipoprotein dsbF OS=Mycobacterium bovis (strain BCG / Pasteur 1173P2) GN=dsbF PE=4 SV=1	cell wall and cell processes	Rv1677	I6XYM2	A0A0H3M5E1	19.238	37.4	24.8745	25.4013	24.2903	22.3097	23.8307	25.2807	26.3385	23.5244	24.5591	24.2756	23.9235	25.3394	4	3	2	4	4	3	4	2	2	2	2	4	2	0	55.141
O50423_MYCTU Probable transcriptional regulatory protein OS=Mycobacterium tuberculosis (strain ATCC 25618 / H37Rv) GN=Rv1167c PE=1 SV=1;A0A0H3M5E4_MYCBP Probable transcriptional regulatory protein OS=Mycobacterium bovis (strain BCG / Pasteur 1173P2) GN=BCG	Regulatory proteins	Rv1167c	O50423	A0A0H3M5E4	21.962	14.9	18.6796	18.1859	18.3833	18.7064	18.3644	21.8638	19.9342	20.2954	19.5194	19.39	20.2004	18.8508	2	1	1	1	1	2	2	2	1	0	1	2	0	0	29.167
PAFC_MYCTU Protein PafC OS=Mycobacterium tuberculosis (strain ATCC 25618 / H37Rv) GN=pafC PE=1 SV=1;A0A0H3M5F0_MYCBP Uncharacterized protein OS=Mycobacterium bovis (strain BCG / Pasteur 1173P2) GN=BCG_2115c PE=4 SV=1	intermediary metabolism and respiration	Rv2095c	P9WIL9	A0A0H3M5F0	33.764	13.9	17.7515	18.6506	19.6225	19.3601	17.3462	18.1908	20.5882	18.9039	18.8854	19.3319	18.2588	18.8362	3	0	0	1	1	2	3	0	0	1	0	1	1	0	8.0141
O50434_MYCTU Aminotransferase OS=Mycobacterium tuberculosis (strain ATCC 25618 / H37Rv) GN=Rv1178 PE=1 SV=1;A0A0H3M5F4_MYCBP Aminotransferase OS=Mycobacterium bovis (strain BCG / Pasteur 1173P2) GN=BCG_1241 PE=3 SV=1	intermediary metabolism and respiration	Rv1178	O50434	A0A0H3M5F4	37.734	37.6	22.675	23.159	23.0736	22.0517	21.3866	22.675	22.2685	22.4034	23.0843	22.6787	23.2344	22.1347	6	3	4	3	5	3	5	3	4	4	3	4	3	0	28.599
O33195_MYCTU Uncharacterized protein OS=Mycobacterium tuberculosis (strain ATCC 25618 / H37Rv) GN=Rv1693 PE=1 SV=1;A0A0H3M5F6_MYCBP Uncharacterized protein OS=Mycobacterium bovis (strain BCG / Pasteur 1173P2) GN=BCG_1731 PE=4 SV=1	Conserved hypotheticals	Rv1693	O33195	A0A0H3M5F6	6.0947	100	21.768	24.4676	22.1909	19.5115	23.1619	21.471	24.5495	18.3846	19.5799	21.3674	25.6595	23.2137	6	3	4	3	1	5	3	4	1	2	3	4	3	0	61.634
DOP_MYCTU Pup deamidase/depupylase OS=Mycobacterium tuberculosis (strain ATCC 25618 / H37Rv) GN=dop PE=1 SV=1;A0A0H3M5G3_MYCBP Uncharacterized protein OS=Mycobacterium bovis (strain BCG / Pasteur 1173P2) GN=BCG_2129c PE=4 SV=1	intermediary metabolism and respiration	Rv2112c	P9WNU9	A0A0H3M5G3	55.179	40.2	20.6536	23.5694	21.6042	20.766	23.6354	22.6102	23.56	20.5439	24.4476	21.4826	22.7353	20.2961	14	3	3	7	5	6	4	2	4	2	3	6	6	0	120.93
A0A0H3M5G5_MYCBP Possible alternative RNA polymerase sigma factor sigI OS=Mycobacterium bovis (strain BCG / Pasteur 1173P2) GN=sigI PE=3 SV=1;SIGI_MYCTU Probable ECF RNA polymerase sigma factor SigI OS=Mycobacterium tuberculosis (strain ATCC 25618 / H37Rv)	information pathways	Rv1189	A0A0H3M5G5	P9WGH3	44.304	7	21.1275	19.6373	22.211	20.7119	17.4384	18.0958	20.463	19.5558	20.1263	18.073	17.1759	17.5291	2	2	0	2	2	0	2	0	1	1	0	0	0	0	39.131
TRMI_MYCTU tRNA (adenine(58)-N(1))-methyltransferase TrmI OS=Mycobacterium tuberculosis (strain ATCC 25618 / H37Rv) GN=trmI PE=1 SV=1;A0A0H3M5G7_MYCBP tRNA (adenine(58)-N(1))-methyltransferase TrmI OS=Mycobacterium bovis (strain BCG / Pasteur 1173P2) GN=BC	intermediary metabolism and respiration	Rv2118c	P9WFZ1	A0A0H3M5G7	30.122	30.7	21.9779	20.7403	19.4413	20.4465	18.2402	20.8532	21.5208	19.0022	23.2144	19.6106	21.0457	17.2843	5	2	2	1	3	3	3	2	2	2	1	3	1	0	26.692
A0A0H3M5H1_MYCBP Putative initiation inhibitor protein OS=Mycobacterium bovis (strain BCG / Pasteur 1173P2) GN=BCG_1747 PE=4 SV=1;Y1708_MYCTU Uncharacterized protein Rv1708 OS=Mycobacterium tuberculosis (strain ATCC 25618 / H37Rv) GN=Rv1708 PE=1 SV=1	cell wall and cell processes	Rv1708	A0A0H3M5H1	P9WLT1	34.41	50.3	25.7655	26.5382	24.8933	25.6557	25.5062	26.6006	29.6392	26.1048	23.7489	26.7401	28.2505	26.8912	12	4	2	7	6	10	6	2	3	4	3	12	9	0	85.933
DAPD_MYCTU 2,3,4,5-tetrahydropyridine-2,6-dicarboxylate N-succinyltransferase OS=Mycobacterium tuberculosis (strain ATCC 25618 / H37Rv) GN=dapD PE=1 SV=1;A0A0H3M5H2_MYCBP 2,3,4,5-tetrahydropyridine-2,6-dicarboxylate N-succinyltransferase OS=Mycobacterium b	intermediary metabolism and respiration	Rv1201c	P9WP21	A0A0H3M5H2	32.642	67.5	25.7782	24.882	26.4375	26.4708	27.0246	25.783	25.8404	25.5974	25.4862	25.7007	25.6848	24.7488	14	6	3	8	8	8	8	5	6	5	4	8	7	0	148.3
CYSQ_MYCTU 3-phosphoadenosine 5-phosphate phosphatase OS=Mycobacterium tuberculosis (strain ATCC 25618 / H37Rv) GN=cysQ PE=1 SV=1;A0A0H3M5H9_MYCBP Uncharacterized protein OS=Mycobacterium bovis (strain BCG / Pasteur 1173P2) GN=cysQ PE=4 SV=1	intermediary metabolism and respiration	Rv2131c	P9WKJ1	A0A0H3M5H9	28.447	47.9	24.1651	24.7081	24.3084	23.9361	24.2834	25.1064	25.2853	23.9842	24.3333	24.3772	25.0698	22.7592	10	6	5	8	6	9	7	5	4	6	4	7	5	0	88.536
O05307_MYCTU Long-chain-acyl-CoA synthetase OS=Mycobacterium tuberculosis (strain ATCC 25618 / H37Rv) GN=fadD6 PE=1 SV=1;A0A0H3M5I0_MYCBP Probable fatty-acid-CoA ligase fadD6 OS=Mycobacterium bovis (strain BCG / Pasteur 1173P2) GN=fadD6 PE=4 SV=1	lipid metabolism	Rv1206	O05307	A0A0H3M5I0	64.336	28.5	22.487	19.5129	22.8866	22.0711	21.7145	21.6184	19.3635	19.135	21.9405	20.8266	20.3217	18.0034	12	2	2	2	7	8	2	1	3	2	1	1	3	0	32.642
O06238_MYCTU Uncharacterized protein OS=Mycobacterium tuberculosis (strain ATCC 25618 / H37Rv) GN=Rv2137c PE=1 SV=1;A0A0H3M5I2_MYCBP Uncharacterized protein OS=Mycobacterium bovis (strain BCG / Pasteur 1173P2) GN=BCG_2154c PE=4 SV=1	Conserved hypotheticals	Rv2137c	O06238	A0A0H3M5I2	14.965	13.9	17.4866	16.9591	17.215	18.2753	18.7778	18.4327	17.8164	18.0752	17.9309	18.2322	17.8947	17.7521	3	2	2	2	3	0	3	1	2	2	2	2	0	0	12.263
O05312_MYCTU Conserved protein OS=Mycobacterium tuberculosis (strain ATCC 25618 / H37Rv) GN=Rv1211 PE=1 SV=3;A0A0H3M5I5_MYCBP Uncharacterized protein OS=Mycobacterium bovis (strain BCG / Pasteur 1173P2) GN=BCG_1271 PE=4 SV=1	Conserved hypotheticals	Rv1211	O05312	A0A0H3M5I5	7.8099	48	24.3775	20.984	24.4181	20.3683	27.1209	23.5959	22.3751	22.1493	21.2634	22.0323	23.3397	24.5334	3	3	2	3	2	3	3	2	3	3	2	3	3	0	86.76
A0A0H3M5J1_MYCBP Probable serine protease htrA OS=Mycobacterium bovis (strain BCG / Pasteur 1173P2) GN=htrA PE=4 SV=1;O06291_MYCTU Probable serine protease HtrA (DEGP protein) OS=Mycobacterium tuberculosis (strain ATCC 25618 / H37Rv) GN=htrA PE=1 SV=3	intermediary metabolism and respiration	Rv1223	A0A0H3M5J1	O06291	54.182	66.5	22.7854	22.9095	22.4213	23.7531	25.3671	23.3616	21.6984	23.4172	22.4321	23.763	23.5489	23.628	25	15	6	18	13	24	19	5	10	7	6	21	14	0	229.6
P71990_MYCTU Alkyl hydroperoxide reductase OS=Mycobacterium tuberculosis (strain ATCC 25618 / H37Rv) GN=Rv1732c PE=1 SV=1;A0A0H3M5J2_MYCBP Uncharacterized protein OS=Mycobacterium bovis (strain BCG / Pasteur 1173P2) GN=BCG_1771c PE=4 SV=1	Conserved hypotheticals	Rv1732c	P71990	A0A0H3M5J2	19.399	43.4	21.1575	22.1232	21.337	20.9182	25.0662	21.8225	22.1858	20.4772	22.2556	21.2177	22.5369	22.3428	9	6	4	7	6	8	6	3	4	3	4	6	5	0	96.834
APBC_MYCTU Iron-sulfur cluster carrier protein OS=Mycobacterium tuberculosis (strain ATCC 25618 / H37Rv) GN=mrp PE=1 SV=1;A0A0H3M5J5_MYCBP Iron-sulfur cluster carrier protein OS=Mycobacterium bovis (strain BCG / Pasteur 1173P2) GN=mrp PE=3 SV=1	intermediary metabolism and respiration	Rv1229c	P9WJN7	A0A0H3M5J5	40.084	22.8	21.3052	21.0607	20.0994	23.1218	18.078	22.5406	21.6288	23.0141	20.5793	22.5012	21.6691	20.8153	6	1	3	4	3	4	3	1	3	1	2	3	3	0	57.052
MURE_MYCTU UDP-N-acetylmuramoyl-L-alanyl-D-glutamate--2,6-diaminopimelate ligase OS=Mycobacterium tuberculosis (strain ATCC 25618 / H37Rv) GN=murE PE=1 SV=1;A0A0H3M5J7_MYCBP UDP-N-acetylmuramoyl-L-alanyl-D-glutamate--2,6-diaminopimelate ligase OS=Mycobacte	cell wall and cell processes	Rv2158c	P9WJL3	A0A0H3M5J7	55.34	30.8	20.3848	20.3787	19.9668	22.7335	20.1366	22.2999	20.6136	22.163	18.756	21.242	21.7316	20.5025	10	3	3	5	7	6	6	1	4	1	5	7	4	0	119.55
P72005_MYCTU Uncharacterized protein OS=Mycobacterium tuberculosis (strain ATCC 25618 / H37Rv) GN=Rv1748 PE=1 SV=1;A0A0H3M5K5_MYCBP Uncharacterized protein OS=Mycobacterium bovis (strain BCG / Pasteur 1173P2) GN=BCG_1787 PE=4 SV=1	Conserved hypotheticals	Rv1748	P72005	A0A0H3M5K5	27.084	33.7	18.0747	19.3426	18.5663	19.9545	17.5244	17.5094	19.4422	18.301	19.2497	18.4477	16.9411	18.7268	8	1	1	1	2	8	1	0	1	0	1	2	2	0	19.932
O50460_MYCTU Acetoin dehydrogenase OS=Mycobacterium tuberculosis (strain ATCC 25618 / H37Rv) GN=Rv1245c PE=1 SV=1;A0A0H3M5K7_MYCBP Probable short-chain type dehydrogenase/reductase OS=Mycobacterium bovis (strain BCG / Pasteur 1173P2) GN=BCG_1305c PE=3 SV=1	intermediary metabolism and respiration	Rv1245c	O50460	A0A0H3M5K7	29.215	54.3	25.213	24.0465	24.5769	24.8505	23.3859	24.1962	23.5637	24.0176	24.0384	24.1045	24.2189	25.5194	10	4	3	6	5	7	5	3	5	3	4	6	5	0	64.177
O53506_MYCTU Conserved protein OS=Mycobacterium tuberculosis (strain ATCC 25618 / H37Rv) GN=Rv2172c PE=1 SV=3;A0A0H3M5K8_MYCBP Uncharacterized protein OS=Mycobacterium bovis (strain BCG / Pasteur 1173P2) GN=BCG_2187c PE=4 SV=1	Conserved hypotheticals	Rv2172c	O53506	A0A0H3M5K8	33.039	67.4	26.3228	26.1952	26.4948	26.2731	23.7676	26.5776	26.489	26.9138	26.7671	26.8317	26.4328	24.5888	12	8	7	8	6	7	6	8	4	6	6	12	7	0	214.57
O50466_MYCTU Nuclease OS=Mycobacterium tuberculosis (strain ATCC 25618 / H37Rv) GN=Rv1251c PE=1 SV=3;A0A0H3M5L3_MYCBP Uncharacterized protein OS=Mycobacterium bovis (strain BCG / Pasteur 1173P2) GN=BCG_1311c PE=4 SV=1	Conserved hypotheticals	Rv1251c	O50466	A0A0H3M5L3	123.15	3.2	19.9276	19.3408	21.6045	20.1278	18.5635	19.8068	20.5683	18.6794	19.1743	19.7699	17.7325	19.4	3	2	1	2	3	0	3	0	1	0	0	0	0	0	7.5655
O06796_MYCTU Possible exported protein OS=Mycobacterium tuberculosis (strain ATCC 25618 / H37Rv) GN=Rv1761c PE=1 SV=1;A0A0H3M5M1_MYCBP Hypothetical exported protein OS=Mycobacterium bovis (strain BCG / Pasteur 1173P2) GN=BCG_1802c PE=4 SV=1	cell wall and cell processes	Rv1761c	O06796	A0A0H3M5M1	13.487	64.6	20.7198	21.3623	20.2222	22.2646	19.7615	22.6165	21.2574	22.1848	18.6879	23.0226	22.7865	19.4112	4	1	2	3	4	2	4	3	3	2	3	3	1	0	17.373
O33177_MYCTU Oxidoreductase OS=Mycobacterium tuberculosis (strain ATCC 25618 / H37Rv) GN=Rv1774 PE=1 SV=1;A0A0H3M5M8_MYCBP Probable oxidoreductase OS=Mycobacterium bovis (strain BCG / Pasteur 1173P2) GN=BCG_1807 PE=4 SV=1	intermediary metabolism and respiration	Rv1774	O33177	A0A0H3M5M8	48.34	44.4	28.1879	26.4906	28.3714	27.2755	25.8186	26.5203	27.281	26.5631	28.6128	27.2373	25.9718	28.011	11	6	6	7	8	6	8	5	5	4	4	8	8	0	93.336
EMBR_MYCTU Transcriptional regulatory protein EmbR OS=Mycobacterium tuberculosis (strain ATCC 25618 / H37Rv) GN=embR PE=1 SV=1;A0A0H3M5N0_MYCBP Probable transcriptional regulatory protein embR OS=Mycobacterium bovis (strain BCG / Pasteur 1173P2) GN=embR PE	Regulatory proteins	Rv1267c	P9WGJ9	A0A0H3M5N0	41.933	44.1	24.1416	22.0115	24.2543	24.262	20.198	23.9776	22.0011	22.2896	24.1815	22.3734	22.5084	21.453	11	4	3	5	6	2	9	3	6	3	4	8	4	0	73.979
CP143_MYCTU Putative cytochrome P450 143 OS=Mycobacterium tuberculosis (strain ATCC 25618 / H37Rv) GN=cyp143 PE=1 SV=1;A0A0H3M5N8_MYCBP Probable cytochrome P450 143 cyp143 OS=Mycobacterium bovis (strain BCG / Pasteur 1173P2) GN=cyp143 PE=3 SV=1	intermediary metabolism and respiration	Rv1785c	P9WPL3	A0A0H3M5N8	43.541	12.5	20.5025	17.8517	20.778	21.5827	16.5868	20.3706	20.2157	20.0889	20.7955	20.2364	20.8662	18.906	3	3	0	3	3	1	2	1	2	3	2	2	1	0	9.8884
Q50699_MYCTU Uncharacterized protein OS=Mycobacterium tuberculosis (strain ATCC 25618 / H37Rv) GN=Rv1277 PE=1 SV=2;A0A0H3M5P0_MYCBP Uncharacterized protein OS=Mycobacterium bovis (strain BCG / Pasteur 1173P2) GN=BCG_1336 PE=4 SV=1	Conserved hypotheticals	Rv1277	Q50699	A0A0H3M5P0	44.79	16.3	24.9905	22.506	24.7631	23.1944	17.6543	23.2842	19.0379	22.9088	22.5596	20.3716	20.4257	18.51	4	3	2	3	4	0	2	1	3	2	1	3	1	0	13.482
DCDA_MYCTU Diaminopimelate decarboxylase OS=Mycobacterium tuberculosis (strain ATCC 25618 / H37Rv) GN=lysA PE=1 SV=1;A0A0H3M5P9_MYCBP Diaminopimelate decarboxylase OS=Mycobacterium bovis (strain BCG / Pasteur 1173P2) GN=lysA PE=3 SV=1	intermediary metabolism and respiration	Rv1293	P9WIU7	A0A0H3M5P9	47.457	23.7	17.841	19.7313	20.0757	20.8402	20.0228	19.6832	20.3352	20.0964	18.6383	19.0055	19.6955	18.8159	7	1	0	4	3	4	2	0	1	2	1	5	0	0	24.646
A0A0H3M5Q8_MYCBP Conserved hypothetical secreted protein OS=Mycobacterium bovis (strain BCG / Pasteur 1173P2) GN=BCG_1372 PE=4 SV=1;Y1312_MYCTU Uncharacterized protein Rv1312 OS=Mycobacterium tuberculosis (strain ATCC 25618 / H37Rv) GN=Rv1312 PE=1 SV=1	cell wall and cell processes	Rv1312	A0A0H3M5Q8	P9WM29	16.13	11.8	24.4628	21.3145	23.0719	22.3779	18.1384	19.7378	19.4932	18.7804	22.8448	18.8098	18.6123	22.6405	1	1	1	1	1	0	1	1	0	1	0	1	1	0	8.7145
OGT_MYCTU Methylated-DNA--protein-cysteine methyltransferase OS=Mycobacterium tuberculosis (strain ATCC 25618 / H37Rv) GN=ogt PE=1 SV=1;A0A0H3M5R1_MYCBP Methylated-DNA--protein-cysteine methyltransferase OS=Mycobacterium bovis (strain BCG / Pasteur 1173P2)	information pathways	Rv1316c	P9WJW5	A0A0H3M5R1	17.858	41.8	18.3152	18.9579	18.7104	20.6472	20.0632	22.0591	19.428	20.847	18.4112	20.18	17.6596	20.3533	5	1	0	1	2	5	1	0	2	1	2	1	2	0	60.475
ADOK_MYCTU Adenosine kinase OS=Mycobacterium tuberculosis (strain ATCC 25618 / H37Rv) GN=adoK PE=1 SV=1;A0A0H3M5R5_MYCBP Adenosine kinase OS=Mycobacterium bovis (strain BCG / Pasteur 1173P2) GN=adoK PE=4 SV=1	intermediary metabolism and respiration	Rv2202c	P9WID5	A0A0H3M5R5	34.472	71.3	25.2443	25.9535	26.181	24.8451	24.0512	25.4133	26.0513	24.2646	26.7032	24.8682	27.4981	27.1843	14	10	7	12	7	7	8	8	7	8	7	12	11	0	162.62
Y1830_MYCTU Uncharacterized HTH-type transcriptional regulator Rv1830 OS=Mycobacterium tuberculosis (strain ATCC 25618 / H37Rv) GN=Rv1830 PE=1 SV=1;A0A0H3M5R7_MYCBP Uncharacterized protein OS=Mycobacterium bovis (strain BCG / Pasteur 1173P2) GN=BCG_1865 PE	Conserved hypotheticals	Rv1830	P9WME5	A0A0H3M5R7	24.02	24.9	18.5116	20.1958	18.1022	17.7866	18.8695	17.992	20.9588	18.0901	20.6363	18.9855	18.3275	18.8671	5	3	1	4	4	5	2	0	1	0	0	3	2	0	19.887
A0A0H3M5S1_MYCBP Uncharacterized protein OS=Mycobacterium bovis (strain BCG / Pasteur 1173P2) GN=BCG_1871c PE=4 SV=1;Y1836_MYCTU Uncharacterized protein Rv1836c OS=Mycobacterium tuberculosis (strain ATCC 25618 / H37Rv) GN=Rv1836c PE=1 SV=1	Conserved hypotheticals	Rv1836c	A0A0H3M5S1	P9WLQ9	69.604	45.5	24.9881	25.3912	24.1369	25.6867	25.0286	26.0818	26.5194	25.6705	26.085	25.9945	25.4332	24.2223	18	10	7	12	11	16	14	6	9	5	7	16	9	0	206.04
A0A0H3M5S4_MYCBP Dihydrolipoamide acetyltransferase component of pyruvate dehydrogenase complex OS=Mycobacterium bovis (strain BCG / Pasteur 1173P2) GN=dlaT PE=3 SV=1;ODP2_MYCTU Dihydrolipoyllysine-residue acetyltransferase component of pyruvate dehydrogen	intermediary metabolism and respiration	Rv2215	A0A0H3M5S4	P9WIS7	57.073	77.9	26.6866	26.752	27.2127	27.2119	29.5286	27.3546	27.0129	27.4603	27.7188	27.2957	27.2581	27.5449	28	20	9	22	17	26	23	12	12	9	8	23	23	0	323.31
Y2237_MYCTU Uncharacterized protein Rv2237 OS=Mycobacterium tuberculosis (strain ATCC 25618 / H37Rv) GN=Rv2237 PE=1 SV=1;A0A0H3M5U3_MYCBP Uncharacterized protein OS=Mycobacterium bovis (strain BCG / Pasteur 1173P2) GN=BCG_2254 PE=4 SV=1	Conserved hypotheticals	Rv2237	P9WLH1	A0A0H3M5U3	29.067	21.2	22.2265	18.1766	22.1943	22.0073	16.1197	21.9126	19.9804	21.7466	18.8766	19.7641	18.0277	19.6813	4	2	1	3	3	1	2	0	2	1	1	1	0	0	28.842
Y2242_MYCTU Uncharacterized protein Rv2242 OS=Mycobacterium tuberculosis (strain ATCC 25618 / H37Rv) GN=Rv2242 PE=1 SV=1;A0A0H3M5U7_MYCBP Uncharacterized protein OS=Mycobacterium bovis (strain BCG / Pasteur 1173P2) GN=BCG_2259 PE=4 SV=1	Conserved hypotheticals	Rv2242	P9WPH5	A0A0H3M5U7	44.637	15.5	19.246	18.8885	22.164	22.2433	18.3821	18.9581	19.0283	17.8996	19.0362	22.1931	19.2734	19.0205	3	1	2	2	2	1	0	0	1	1	2	2	2	0	25.84
PCC6_MYCTU Probable propionyl-CoA carboxylase beta chain 6 OS=Mycobacterium tuberculosis (strain ATCC 25618 / H37Rv) GN=accD6 PE=1 SV=1;A0A0H3M5V0_MYCBP Acetyl/propionyl-CoA carboxylase (Beta subunit) accD6 OS=Mycobacterium bovis (strain BCG / Pasteur 1173	lipid metabolism	Rv2247	P9WQH5	A0A0H3M5V0	50.135	37.6	20.6951	19.9988	20.3115	22.4489	18.9422	20.7359	19.3065	21.4454	20.7953	20.3986	22.2263	20.9069	12	4	4	6	6	8	4	1	4	2	3	6	4	0	81.08
A0A0H3M5V5_MYCBP Possible flavoprotein OS=Mycobacterium bovis (strain BCG / Pasteur 1173P2) GN=BCG_2269 PE=4 SV=1;L0TBR2_MYCTU Possible flavoprotein OS=Mycobacterium tuberculosis (strain ATCC 25618 / H37Rv) GN=Rv2251 PE=1 SV=1	intermediary metabolism and respiration	Rv2251	A0A0H3M5V5	L0TBR2	55.769	31.2	25.0295	22.8267	24.8228	23.9105	23.1059	23.2139	18.8582	23.1474	23.8547	23.6497	23.9103	24.4014	11	3	2	5	4	6	3	1	1	2	2	8	4	0	61.237
A0A0H3M5V7_MYCBP Possible transmembrane protein OS=Mycobacterium bovis (strain BCG / Pasteur 1173P2) GN=BCG_1925c PE=4 SV=1;O07744_MYCTU Possible transmembrane protein OS=Mycobacterium tuberculosis (strain ATCC 25618 / H37Rv) GN=Rv1888c PE=4 SV=1	cell wall and cell processes	Rv1888c	A0A0H3M5V7	O07744	27.442	29.3	23.1986	23.314	24.1523	23.5939	21.2096	22.5611	19.0299	23.9942	22.9513	19.3534	19.1638	22.459	5	2	3	3	3	4	3	1	2	2	2	2	2	0	31.636
CARA_MYCTU Carbamoyl-phosphate synthase small chain OS=Mycobacterium tuberculosis (strain ATCC 25618 / H37Rv) GN=carA PE=1 SV=1;A0A0H3M5W3_MYCBP Carbamoyl-phosphate synthase small chain OS=Mycobacterium bovis (strain BCG / Pasteur 1173P2) GN=carA PE=3 SV=1	intermediary metabolism and respiration	Rv1383	P9WPK5	A0A0H3M5W3	39.766	31.1	24.2839	23.7141	24.9015	23.1106	23.1194	24.0737	23.1734	22.9805	24.9626	19.2875	23.6427	18.4075	7	3	3	4	3	5	3	2	2	2	1	4	1	0	31.492
KGUA_MYCTU Guanylate kinase OS=Mycobacterium tuberculosis (strain ATCC 25618 / H37Rv) GN=gmk PE=1 SV=1;A0A0H3M5W6_MYCBP Guanylate kinase OS=Mycobacterium bovis (strain BCG / Pasteur 1173P2) GN=gmk PE=3 SV=1	intermediary metabolism and respiration	Rv1389	P9WKE9	A0A0H3M5W6	22.095	16.8	19.1756	18.583	20.4598	19.4192	18.664	21.6143	18.4526	19.159	20.6953	19.4161	19.3672	18.4529	2	1	1	2	2	0	2	1	2	1	2	1	1	0	8.7643
A0A0H3M5X5_MYCBP Possible glycerolphosphodiesterase OS=Mycobacterium bovis (strain BCG / Pasteur 1173P2) GN=BCG_2294c PE=4 SV=1;Y2277_MYCTU Uncharacterized protein Rv2277c OS=Mycobacterium tuberculosis (strain ATCC 25618 / H37Rv) GN=Rv2277c PE=1 SV=1	intermediary metabolism and respiration	Rv2277c	A0A0H3M5X5	P9WLF1	31.846	47.8	23.4702	25.4228	23.5803	24.4847	22.1094	25.9064	25.918	24.672	24.881	25.4709	25.3763	23.7388	9	6	5	5	6	9	6	5	6	5	5	7	6	0	154.6
A0A0H3M5X7_MYCBP Probable isocitrate lyase aceA OS=Mycobacterium bovis (strain BCG / Pasteur 1173P2) GN=aceA PE=4 SV=1	intermediary metabolism and respiration		A0A0H3M5X7	O07718	85.319	48.2	26.766	25.8775	26.3084	25.4942	25.5951	25.0405	25.1988	25.2565	25.7757	24.7836	24.7513	26.2429	29	11	11	18	18	18	14	6	9	11	8	19	16	0	177.42
Q50681_MYCTU Esterase OS=Mycobacterium tuberculosis (strain ATCC 25618 / H37Rv) GN=lipM PE=1 SV=1;A0A0H3M5X8_MYCBP Probable esterase LipM OS=Mycobacterium bovis (strain BCG / Pasteur 1173P2) GN=lipM PE=4 SV=1	intermediary metabolism and respiration	Rv2284	Q50681	A0A0H3M5X8	46.681	32.9	22.6241	23.51	22.7506	24.019	17.7603	24.8546	19.7636	22.7383	23.7879	22.5058	22.2856	18.6781	7	3	3	5	4	3	4	0	5	2	2	3	1	0	58.877
A0A0H3M5Y1_MYCBP Probable fmu protein OS=Mycobacterium bovis (strain BCG / Pasteur 1173P2) GN=fmu PE=3 SV=1;Y1407_MYCTU Putative methyltransferase Rv1407 OS=Mycobacterium tuberculosis (strain ATCC 25618 / H37Rv) GN=Rv1407 PE=1 SV=1	information pathways	Rv1407	A0A0H3M5Y1	P9WGX3	48.493	7	19.9766	19.4306	20.0281	19.3375	18.0636	20.0481	19.7361	20.3102	19.4665	19.6293	19.5	19.0231	2	2	0	2	2	1	2	0	1	1	0	2	0	0	17.701
O53963_MYCTU Lipoprotein OS=Mycobacterium tuberculosis (strain ATCC 25618 / H37Rv) GN=lppF PE=4 SV=2;A0A0H3M5Y2_MYCBP Probable conserved lipoprotein lppF OS=Mycobacterium bovis (strain BCG / Pasteur 1173P2) GN=lppF PE=4 SV=1	cell wall and cell processes	Rv1921c	O53963	A0A0H3M5Y2	44.995	32.6	18.2538	19.6804	18.6872	21.1713	20.9098	20.6194	19.9291	19.3346	20.6018	18.7832	20.4868	20.3932	9	1	1	2	3	7	6	0	0	0	1	3	3	0	39.162
MP63_MYCTU Immunogenic protein MPT63 OS=Mycobacterium tuberculosis (strain ATCC 25618 / H37Rv) GN=mpt63 PE=1 SV=1;A0A0H3M5Y6_MYCBP Immunogenic protein mpt63 OS=Mycobacterium bovis (strain BCG / Pasteur 1173P2) GN=mpt63 PE=4 SV=1	cell wall and cell processes	Rv1926c	P9WIP1	A0A0H3M5Y6	16.514	57.2	23.9739	27.1345	24.9355	24.0201	24.5378	26.5487	27.2825	25.3103	25.0955	26.567	26.7969	25.3672	6	4	3	4	4	5	5	5	3	3	5	4	5	0	203.93
CBL_MYCTU Putative cystathionine beta-lyase OS=Mycobacterium tuberculosis (strain ATCC 25618 / H37Rv) GN=Rv2294 PE=1 SV=1;A0A0H3M5Y7_MYCBP Probable aminotransferase OS=Mycobacterium bovis (strain BCG / Pasteur 1173P2) GN=BCG_2310 PE=4 SV=1	intermediary metabolism and respiration	Rv2294	P9WQ83	A0A0H3M5Y7	44.283	66.1	22.8405	23.2451	22.4549	24.018	20.5685	23.7712	22.4009	23.1187	22.2081	22.966	23.6903	22.1837	17	7	7	8	9	9	9	6	9	6	7	11	5	0	92.1
Y1419_MYCTU Uncharacterized protein Rv1419 OS=Mycobacterium tuberculosis (strain ATCC 25618 / H37Rv) GN=Rv1419 PE=1 SV=1;A0A0H3M5Y9_MYCBP Uncharacterized protein OS=Mycobacterium bovis (strain BCG / Pasteur 1173P2) GN=BCG_1480 PE=4 SV=1	Conserved hypotheticals	Rv1419	P9WLX9	A0A0H3M5Y9	16.853	63.7	18.9625	22.834	18.6781	18.9276	21.2272	22.7119	23.0603	18.1777	19.329	22.7555	22.1513	18.6294	5	1	2	2	2	4	4	3	1	1	2	5	1	0	20.307
A0A0H3M5Z7_MYCBP Uncharacterized protein OS=Mycobacterium bovis (strain BCG / Pasteur 1173P2) GN=BCG_2321 PE=4 SV=1;Y2305_MYCTU Uncharacterized protein Rv2305 OS=Mycobacterium tuberculosis (strain ATCC 25618 / H37Rv) GN=Rv2305 PE=1 SV=1	Conserved hypotheticals	Rv2305	A0A0H3M5Z7	P9WLD1	46.181	33.3	18.8354	18.1588	19.3341	19.912	17.0058	19.1626	19.0318	19.7306	20.2337	20.0588	21.8637	22.2135	7	1	2	2	2	1	2	1	2	1	2	4	2	0	70.747
P71897_MYCTU Conserved protein OS=Mycobacterium tuberculosis (strain ATCC 25618 / H37Rv) GN=Rv2315c PE=1 SV=2;A0A0H3M610_MYCBP Uncharacterized protein OS=Mycobacterium bovis (strain BCG / Pasteur 1173P2) GN=BCG_2336c PE=4 SV=1	Conserved hypotheticals	Rv2315c	P71897	A0A0H3M610	54.577	17.6	18.0584	19.9929	22.0509	21.5228	18.9492	21.4404	19.3085	21.5328	21.3536	21.148	21.2648	19.2022	6	1	2	2	3	4	3	0	2	3	3	2	1	0	23.795
O06815_MYCTU ATPase OS=Mycobacterium tuberculosis (strain ATCC 25618 / H37Rv) GN=Rv1444c PE=1 SV=1;A0A0H3M611_MYCBP Uncharacterized protein OS=Mycobacterium bovis (strain BCG / Pasteur 1173P2) GN=BCG_1505c PE=4 SV=1	Conserved hypotheticals	Rv1444c	O06815	A0A0H3M611	15.023	73.5	21.135	19.681	21.7467	21.9521	22.844	21.0761	19.7016	19.0489	23.3404	20.457	24.2971	22.3494	6	3	1	4	2	4	3	1	1	2	1	6	3	0	55.986
Y1461_MYCTU UPF0051 protein Rv1461 OS=Mycobacterium tuberculosis (strain ATCC 25618 / H37Rv) GN=Rv1461 PE=1 SV=1;A0A0H3M629_MYCBP Uncharacterized protein OS=Mycobacterium bovis (strain BCG / Pasteur 1173P2) GN=BCG_1522 PE=4 SV=1	Conserved hypotheticals	Rv1461	P9WFP7	A0A0H3M629	94.17	37.5	25.727	24.1983	24.8988	24.8907	22.33	23.9288	24.6243	24.1853	24.4414	22.1884	23.0997	24.8767	21	5	4	9	7	15	7	2	5	4	4	11	14	0	109.78
CYSK_MYCTU O-acetylserine sulfhydrylase OS=Mycobacterium tuberculosis (strain ATCC 25618 / H37Rv) GN=cysK1 PE=1 SV=1;A0A0H3M632_MYCBP Cysteine synthase OS=Mycobacterium bovis (strain BCG / Pasteur 1173P2) GN=cysK1 PE=3 SV=1	intermediary metabolism and respiration	Rv2334	P9WP55	A0A0H3M632	32.752	55.2	23.9062	24.6749	24.1512	22.8989	23.0979	24.5064	25.0147	22.4062	24.6358	23.2192	25.7464	24.6103	10	4	6	5	5	8	6	5	3	5	4	6	7	0	60.839
O53157_MYCTU Conserved protein OS=Mycobacterium tuberculosis (strain ATCC 25618 / H37Rv) GN=Rv1466 PE=1 SV=2;A0A0H3M633_MYCBP Uncharacterized protein OS=Mycobacterium bovis (strain BCG / Pasteur 1173P2) GN=BCG_1527 PE=4 SV=1	Conserved hypotheticals	Rv1466	O53157	A0A0H3M633	12.384	39.1	26.6292	26.5409	26.6259	25.2075	27.3845	26.3082	27.7364	25.1508	26.7206	26.8924	29.2283	27.211	3	3	2	3	2	3	3	2	2	3	2	3	3	0	75.659
L7N664_MYCTU Thioredoxin OS=Mycobacterium tuberculosis (strain ATCC 25618 / H37Rv) GN=trxB1 PE=1 SV=1;A0A0H3M638_MYCBP Thioredoxin OS=Mycobacterium bovis (strain BCG / Pasteur 1173P2) GN=trxB1 PE=3 SV=1	intermediary metabolism and respiration	Rv1471	L7N664	A0A0H3M638	13.341	47.2	25.8481	25.9229	24.0902	25.6775	24.1774	25.5128	26.3954	26.4482	25.7378	25.7268	24.5581	21.9853	4	3	2	3	3	4	4	3	1	2	1	4	2	0	72.893
ACNA_MYCTU Aconitate hydratase A OS=Mycobacterium tuberculosis (strain ATCC 25618 / H37Rv) GN=acn PE=1 SV=1;A0A0H3M648_MYCBP Probable aconitate hydratase acn OS=Mycobacterium bovis (strain BCG / Pasteur 1173P2) GN=acn PE=4 SV=1	intermediary metabolism and respiration	Rv1475c	O53166	A0A0H3M648	102.45	65.6	27.1645	27.2813	27.5148	27.6531	27.4641	27.0079	27.7048	27.623	27.5592	27.9947	27.6311	27.2299	39	23	17	29	23	30	27	11	13	21	13	26	27	0	323.31
HSD_MYCTU 3-alpha-(or 20-beta)-hydroxysteroid dehydrogenase OS=Mycobacterium tuberculosis (strain ATCC 25618 / H37Rv) GN=fabG3 PE=1 SV=1;A0A0H3M654_MYCBP Possible 20-beta-hydroxysteroid dehydrogenase fabG3 OS=Mycobacterium bovis (strain BCG / Pasteur 1173P	lipid metabolism	Rv2002	P9WGT1	A0A0H3M654	27.029	31.5	17.4221	22.9222	23.4034	24.2315	24.0951	22.7914	23.1859	22.6299	22.9143	22.7316	21.0411	19.138	6	2	2	3	4	4	2	3	4	2	3	3	2	0	83.737
Y1480_MYCTU Uncharacterized protein Rv1480 OS=Mycobacterium tuberculosis (strain ATCC 25618 / H37Rv) GN=Rv1480 PE=1 SV=1;A0A0H3M655_MYCBP Uncharacterized protein OS=Mycobacterium bovis (strain BCG / Pasteur 1173P2) GN=BCG_1542 PE=4 SV=1	Conserved hypotheticals	Rv1480	P9WLX5	A0A0H3M655	34.333	49.8	24.6651	23.8436	24.4385	24.4299	23.2957	23.8303	23.793	24.6829	24.2686	24.1449	24.2856	23.7068	13	8	3	9	5	7	4	3	4	4	4	10	9	0	101.35
CYSA_MYCTU Sulfate/thiosulfate import ATP-binding protein CysA OS=Mycobacterium tuberculosis (strain ATCC 25618 / H37Rv) GN=cysA PE=1 SV=2;A0A0H3M675_MYCBP Sulfate/thiosulfate import ATP-binding protein CysA OS=Mycobacterium bovis (strain BCG / Pasteur 117	cell wall and cell processes	Rv2397c	P9WQM1	A0A0H3M675	37.443	15.1	17.7044	20.1639	20.9967	20.2449	17.3192	19.1269	19.3869	18.6099	19.1699	20.0172	18.9598	20.2262	2	1	1	2	2	0	2	0	1	1	0	0	2	0	8.5286
PKS5_MYCTU Mycocerosic acid synthase-like polyketide synthase OS=Mycobacterium tuberculosis (strain ATCC 25618 / H37Rv) GN=pks5 PE=1 SV=2;A0A0H3M694_MYCBP Probable polyketide synthase pks5 OS=Mycobacterium bovis (strain BCG / Pasteur 1173P2) GN=pks5 PE=4 S	lipid metabolism	Rv1527c	O53901	A0A0H3M694	223.89	13.5	20.9755	21.6149	21.5811	23.0336	18.2666	23.2149	20.8186	21.2459	20.2939	19.1927	21.116	19.2894	14	3	3	4	11	5	10	2	3	2	3	5	0	0	93.942
O53479_MYCTU ATPase OS=Mycobacterium tuberculosis (strain ATCC 25618 / H37Rv) GN=Rv2035 PE=1 SV=1;A0A0H3M698_MYCBP Uncharacterized protein OS=Mycobacterium bovis (strain BCG / Pasteur 1173P2) GN=BCG_2054 PE=4 SV=1	Conserved hypotheticals	Rv2035	O53479	A0A0H3M698	18.515	66.7	18.2555	21.0132	18.7174	22.2636	21.0674	20.5064	20.0779	21.3172	20.4092	21.7698	20.1412	18.0388	7	2	1	2	3	3	5	1	3	1	2	5	1	0	26.444
Y1543_MYCTU Uncharacterized oxidoreductase Rv1543 OS=Mycobacterium tuberculosis (strain ATCC 25618 / H37Rv) GN=Rv1543 PE=1 SV=1;A0A0H3M6B2_MYCBP Possible fatty acyl-CoA reductase OS=Mycobacterium bovis (strain BCG / Pasteur 1173P2) GN=BCG_1595 PE=3 SV=1	lipid metabolism	Rv1543	P9WGS1	A0A0H3M6B2	36.82	61.3	25.6239	24.5526	25.2633	26.3169	25.2311	26.0228	24.9756	25.5847	25.3297	24.9456	24.8518	25.2012	19	12	10	13	15	10	14	10	10	9	7	15	11	0	222.64
RBPA_MYCTU RNA polymerase-binding protein RbpA OS=Mycobacterium tuberculosis (strain ATCC 25618 / H37Rv) GN=rbpA PE=1 SV=1;A0A0H3M6B6_MYCBP RNA polymerase-binding protein RbpA OS=Mycobacterium bovis (strain BCG / Pasteur 1173P2) GN=rbpA PE=3 SV=1	Conserved hypotheticals	Rv2050	P9WHJ5	A0A0H3M6B6	12.972	62.2	23.4343	23.0712	23.6818	22.2096	23.1628	23.2397	23.3238	21.813	22.7268	21.9973	25.8862	22.6043	5	5	4	4	2	4	4	3	1	4	1	4	5	0	75.36
DPO3A_MYCTU DNA polymerase III subunit alpha OS=Mycobacterium tuberculosis (strain ATCC 25618 / H37Rv) GN=dnaE1 PE=1 SV=1;A0A0H3M6B9_MYCBP DNA-directed DNA polymerase OS=Mycobacterium bovis (strain BCG / Pasteur 1173P2) GN=dnaE1 PE=3 SV=1	information pathways	Rv1547	P9WNT7	A0A0H3M6B9	129.32	14.4	21.9142	22.7135	22.321	22.9967	21.1204	22.9946	22.4667	21.8942	19.0856	20.6441	22.152	19.7394	10	3	6	6	7	4	8	3	4	2	2	4	1	0	47.628
P71905_MYCTU Possible ribonuclease E Rne OS=Mycobacterium tuberculosis (strain ATCC 25618 / H37Rv) GN=rne PE=1 SV=2;A0A0H3M6C0_MYCBP Possible ribonuclease E rne OS=Mycobacterium bovis (strain BCG / Pasteur 1173P2) GN=rne PE=4 SV=1	information pathways	Rv2444c	P71905	A0A0H3M6C0	103.39	33.1	19.9013	21.4452	20.8909	21.1371	23.132	21.1417	18.2099	20.5804	21.0566	18.9472	22.6939	23.0091	19	4	4	6	6	16	8	1	4	3	0	11	9	0	164.57
MAZE7_MYCTU Antitoxin MazE7 OS=Mycobacterium tuberculosis (strain ATCC 25618 / H37Rv) GN=mazE7 PE=1 SV=1;A0A0H3M6C8_MYCBP Uncharacterized protein OS=Mycobacterium bovis (strain BCG / Pasteur 1173P2) GN=BCG_2082 PE=4 SV=1	virulence, detoxification and adaptation	Rv2063	P9WJ85	A0A0H3M6C8	8.4502	22.1	17.7259	23.7198	22.2466	24.0444	20.3249	24.1208	24.6997	24.1771	24.0968	24.1539	18.0887	20.1444	1	1	1	1	1	1	1	1	1	1	1	0	0	0	9.6559
ILVA_MYCTU L-threonine dehydratase biosynthetic IlvA OS=Mycobacterium tuberculosis (strain ATCC 25618 / H37Rv) GN=ilvA PE=1 SV=1;A0A0H3M6D1_MYCBP L-threonine dehydratase OS=Mycobacterium bovis (strain BCG / Pasteur 1173P2) GN=ilvA PE=3 SV=1	intermediary metabolism and respiration	Rv1559	P9WG95	A0A0H3M6D1	45.04	24.7	20.3838	22.427	20.4188	20.5815	20.7884	21.4638	21.4578	19.0404	21.0827	20.9515	22.5871	20.7145	7	2	3	5	3	4	2	3	1	2	1	4	4	0	34.299
BLAC_MYCTU Beta-lactamase OS=Mycobacterium tuberculosis (strain ATCC 25618 / H37Rv) GN=blaC PE=1 SV=1;A0A0H3M6D3_MYCBP Beta-lactamase OS=Mycobacterium bovis (strain BCG / Pasteur 1173P2) GN=blaC PE=3 SV=1	intermediary metabolism and respiration	Rv2068c	P9WKD3	A0A0H3M6D3	32.567	51.1	25.0243	18.0843	24.5708	24.9693	17.4668	25.1395	24.327	25.7136	24.544	24.0289	23.3467	18.721	9	3	1	3	4	3	6	3	2	3	3	4	0	0	84.063
BIOA_MYCTU Adenosylmethionine-8-amino-7-oxononanoate aminotransferase OS=Mycobacterium tuberculosis (strain ATCC 25618 / H37Rv) GN=bioA PE=1 SV=1;A0A0H3M6D8_MYCBP Adenosylmethionine-8-amino-7-oxononanoate aminotransferase OS=Mycobacterium bovis (strain BCG	intermediary metabolism and respiration	Rv1568	P9WQ81	A0A0H3M6D8	46.319	14.9	21.2855	19.8088	21.7684	21.807	17.1401	21.6355	19.4445	21.24	21.4218	21.1904	21.1134	18.2355	3	2	1	2	2	0	3	1	2	3	2	2	1	0	12.596
A0A0H3M6E3_MYCBP Uncharacterized protein OS=Mycobacterium bovis (strain BCG / Pasteur 1173P2) GN=BCG_2102 PE=4 SV=1;Y2083_MYCTU Uncharacterized protein Rv2083 OS=Mycobacterium tuberculosis (strain ATCC 25618 / H37Rv) GN=Rv2083 PE=4 SV=1	Conserved hypotheticals	Rv2083	A0A0H3M6E3	P9WLK3	30.789	11.5	19.0067	20.0369	19.7693	19.0759	20.1032	15.0589	18.3552	20.9199	18.6248	19.3759	14.7194	18.2752	2	1	0	1	1	2	2	0	1	0	0	2	1	0	6.7924
O53190_MYCTU Esterase OS=Mycobacterium tuberculosis (strain ATCC 25618 / H37Rv) GN=lipP PE=1 SV=1;A0A0H3M6E4_MYCBP Probable esterase/lipase lipP OS=Mycobacterium bovis (strain BCG / Pasteur 1173P2) GN=lipP PE=4 SV=1	intermediary metabolism and respiration	Rv2463	O53190	A0A0H3M6E4	42.839	4.8	19.7307	18.5769	20.4566	21.0685	17.8133	20.5049	18.9563	20.7561	19.1312	19.0026	20.1918	18.9944	1	1	1	1	1	0	1	1	1	1	1	1	0	0	8.6737
A0A0H3M6E5_MYCBP Uncharacterized protein OS=Mycobacterium bovis (strain BCG / Pasteur 1173P2) GN=BCG_1635 PE=4 SV=1;O06593_MYCTU Methyltransferase type 11 OS=Mycobacterium tuberculosis (strain ATCC 25618 / H37Rv) GN=Rv1597 PE=1 SV=1	Conserved hypotheticals	Rv1597	A0A0H3M6E5	O06593	28.038	33.7	24.1243	23.9026	24.9842	24.723	16.761	24.5059	24.7353	24.1479	25.0069	24.4499	23.1551	21.6509	5	3	3	4	4	2	4	2	3	2	3	3	2	0	79.471
Y2468_MYCTU Uncharacterized protein Rv2468c OS=Mycobacterium tuberculosis (strain ATCC 25618 / H37Rv) GN=Rv2468c PE=1 SV=1;A0A0H3M6F0_MYCBP Uncharacterized protein OS=Mycobacterium bovis (strain BCG / Pasteur 1173P2) GN=BCG_2488c PE=4 SV=1	Conserved hypotheticals	Rv2468c	P9WLA7	A0A0H3M6F0	17.288	74.3	25.1798	27.8211	26.0013	24.8174	24.9464	26.9804	27.5828	25.4297	26.2003	26.7997	27.013	25.456	5	4	4	5	5	4	5	4	4	3	4	5	5	0	125.84
I6YCF3_MYCTU Helicase HelZ OS=Mycobacterium tuberculosis (strain ATCC 25618 / H37Rv) GN=helZ PE=1 SV=1;A0A0H3M6F5_MYCBP Probable helicase helZ OS=Mycobacterium bovis (strain BCG / Pasteur 1173P2) GN=helZ PE=4 SV=1	information pathways	Rv2101	I6YCF3	A0A0H3M6F5	111.61	16.8	23.8938	22.688	24.1992	23.3861	18.2577	21.6654	23.3127	19.009	22.2405	19.5784	21.824	17.821	8	3	6	2	4	1	3	2	1	2	0	5	2	0	27.754
O53200_MYCTU Membrane protein OS=Mycobacterium tuberculosis (strain ATCC 25618 / H37Rv) GN=Rv2473 PE=1 SV=1;A0A0H3M6G0_MYCBP Possible alanine and proline rich membrane protein OS=Mycobacterium bovis (strain BCG / Pasteur 1173P2) GN=BCG_2493 PE=4 SV=1	cell wall and cell processes	Rv2473	O53200	A0A0H3M6G0	25.133	29	22.6688	22.3408	22.468	22.8885	22.1821	24.4779	19.6196	22.5154	22.7698	22.9639	21.1854	20.8465	4	3	2	3	2	3	2	1	2	2	2	2	2	0	47.737
METH_MYCTU Methionine synthase OS=Mycobacterium tuberculosis (strain ATCC 25618 / H37Rv) GN=metH PE=1 SV=1;A0A0H3M6G7_MYCBP Probable 5-methyltetrahydrofolate--homocystein methyltransferase MetH (Methionine synthase, vitamin-B12 dependent isozyme) (MS) OS=M	intermediary metabolism and respiration	Rv2124c	O33259	A0A0H3M6G7	130.32	19.9	25.3562	23.8998	24.1108	24.3367	21.7638	24.9048	23.3122	24.0612	23.9018	23.0017	23.9818	21.0913	16	4	6	5	8	12	8	7	6	5	5	10	2	0	100.52
O33263_MYCTU Probable oxidoreductase OS=Mycobacterium tuberculosis (strain ATCC 25618 / H37Rv) GN=Rv2129c PE=1 SV=3;A0A0H3M6H3_MYCBP Probable oxidoreductase OS=Mycobacterium bovis (strain BCG / Pasteur 1173P2) GN=BCG_2146c PE=3 SV=1	intermediary metabolism and respiration	Rv2129c	O33263	A0A0H3M6H3	31.331	17.4	18.4612	19.7295	19.5312	20.7609	18.3931	21.4264	20.1229	19.5265	19.0005	19.2682	20.562	19.7677	5	1	2	2	3	4	2	0	3	2	2	3	0	0	18.882
O06240_MYCTU Conserved protein OS=Mycobacterium tuberculosis (strain ATCC 25618 / H37Rv) GN=Rv2135c PE=1 SV=1;A0A0H3M6H7_MYCBP Uncharacterized protein OS=Mycobacterium bovis (strain BCG / Pasteur 1173P2) GN=BCG_2152c PE=4 SV=1	Conserved hypotheticals	Rv2135c	O06240	A0A0H3M6H7	25.122	44.9	20.0246	19.0041	19.1324	18.9114	19.3096	20.2703	19.5806	19.1367	19.5105	19.3396	19.6892	19.1526	6	2	1	3	1	3	4	1	1	1	1	6	2	0	25.329
PARE2_MYCTU Toxin ParE2 OS=Mycobacterium tuberculosis (strain ATCC 25618 / H37Rv) GN=parE2 PE=1 SV=1;A0A0H3M6I0_MYCBP Uncharacterized protein OS=Mycobacterium bovis (strain BCG / Pasteur 1173P2) GN=BCG_2159c PE=4 SV=1	virulence, detoxification and adaptation	Rv2142c	P9WHG5	A0A0H3M6I0	12.313	20	19.5238	19.2045	18.9098	19.699	18.7158	20.8161	19.4054	19.8224	19.5062	19.9752	20.2163	18.0997	2	2	2	2	2	1	2	2	2	2	2	2	1	0	15.2
A0A0H3M6I2_MYCBP Dihydrolipoamide acetyltransferase component of pyruvate dehydrogenase complex OS=Mycobacterium bovis (strain BCG / Pasteur 1173P2) GN=pdhC PE=3 SV=1;BKDC_MYCTU Dihydrolipoyllysine-residue acyltransferase component of branched-chain alpha-	intermediary metabolism and respiration	Rv2495c	A0A0H3M6I2	O06159	41.061	53.2	23.3418	21.8185	24.2023	24.75	23.1105	24.2943	22.9242	24.4667	22.5609	22.9995	24.6074	23.4358	14	4	3	9	9	7	6	2	5	4	6	6	4	0	68.591
MURF_MYCTU UDP-N-acetylmuramoyl-tripeptide--D-alanyl-D-alanine ligase OS=Mycobacterium tuberculosis (strain ATCC 25618 / H37Rv) GN=murF PE=1 SV=1;A0A0H3M6I8_MYCBP UDP-N-acetylmuramoyl-tripeptide--D-alanyl-D-alanine ligase OS=Mycobacterium bovis (strain BCG	cell wall and cell processes	Rv2157c	P9WJL1	A0A0H3M6I8	51.632	27.3	23.0063	22.2813	23.0332	22.404	16.919	22.3645	21.9912	22.9283	23.8507	22.1103	18.8307	23.6161	6	3	3	5	5	1	4	3	3	3	3	2	1	0	126.32
RS1_MYCTU 30S ribosomal protein S1 OS=Mycobacterium tuberculosis (strain ATCC 25618 / H37Rv) GN=rpsA PE=1 SV=1;A0A0H3M6I9_MYCBP Probable ribosomal protein S1 rpsA OS=Mycobacterium bovis (strain BCG / Pasteur 1173P2) GN=rpsA PE=4 SV=1	information pathways	Rv1630	P9WH43	A0A0H3M6I9	53.201	70.3	25.2436	24.5228	25.1031	24.4011	26.9907	24.3246	24.1608	24.8932	24.3553	24.6002	25.889	25.744	23	19	13	22	14	18	16	13	13	16	8	22	23	0	279.26
I6Y0W5_MYCTU Acyl-CoA dehydrogenase OS=Mycobacterium tuberculosis (strain ATCC 25618 / H37Rv) GN=fadE19 PE=1 SV=1;A0A0H3M6J0_MYCBP Possible acyl-CoA dehydrogenase fadE19 OS=Mycobacterium bovis (strain BCG / Pasteur 1173P2) GN=fadE19 PE=3 SV=1	lipid metabolism	Rv2500c	I6Y0W5	A0A0H3M6J0	41.916	24.1	18.4998	19.2331	18.126	19.3936	17.956	18.45	19.2492	18.8418	19.5831	20.7396	21.0048	18.9793	6	0	0	1	2	4	1	0	1	0	0	4	2	0	10.566
ARGD_MYCTU Acetylornithine aminotransferase OS=Mycobacterium tuberculosis (strain ATCC 25618 / H37Rv) GN=argD PE=1 SV=1;A0A0H3M6K7_MYCBP Acetylornithine aminotransferase OS=Mycobacterium bovis (strain BCG / Pasteur 1173P2) GN=argD PE=3 SV=1	intermediary metabolism and respiration	Rv1655	P9WPZ7	A0A0H3M6K7	40.909	33.2	26.3794	24.1217	26.2678	25.8496	24.0928	25.5124	24.6962	25.8431	25.4868	25.1158	24.8134	24.5059	9	6	4	7	6	5	5	4	3	4	3	7	7	0	91.95
VPB17_MYCTU Putative antitoxin VapB17 OS=Mycobacterium tuberculosis (strain ATCC 25618 / H37Rv) GN=vapB17 PE=1 SV=1;A0A0H3M6L1_MYCBP Uncharacterized protein OS=Mycobacterium bovis (strain BCG / Pasteur 1173P2) GN=BCG_2547 PE=4 SV=1	virulence, detoxification and adaptation	Rv2526	P9WJ49	A0A0H3M6L1	8.2422	53.3	19.2784	19.857	18.3199	18.469	19.9787	19.8183	18.5641	19.8925	19.7952	18.8703	21.0064	19.6058	2	1	1	1	1	1	1	1	1	1	1	2	1	0	13.875
VPB39_MYCTU Antitoxin VapB39 OS=Mycobacterium tuberculosis (strain ATCC 25618 / H37Rv) GN=vapB39 PE=1 SV=1;A0A0H3M6L2_MYCBP Uncharacterized protein OS=Mycobacterium bovis (strain BCG / Pasteur 1173P2) GN=BCG_2552c PE=4 SV=1	virulence, detoxification and adaptation	Rv2530A	P9WJ23	A0A0H3M6L2	7.9938	77	21.7963	23.7105	22.0599	19.3953	21.5914	18.0404	23.0569	18.1453	19.524	20.3484	18.4966	23.7204	3	3	2	3	1	2	2	3	1	2	1	1	3	0	24.223
AROB_MYCTU 3-dehydroquinate synthase OS=Mycobacterium tuberculosis (strain ATCC 25618 / H37Rv) GN=aroB PE=1 SV=1;A0A0H3M6M0_MYCBP 3-dehydroquinate synthase OS=Mycobacterium bovis (strain BCG / Pasteur 1173P2) GN=aroB PE=3 SV=1	intermediary metabolism and respiration	Rv2538c	P9WPX9	A0A0H3M6M0	38.119	15.2	26.1727	23.241	25.9785	25.6366	17.5584	24.3612	24.202	24.9789	24.9201	23.896	18.073	18.9494	3	2	2	2	2	1	2	2	2	2	2	1	1	0	101.13
QCRB_MYCTU Cytochrome bc1 complex cytochrome b subunit OS=Mycobacterium tuberculosis (strain ATCC 25618 / H37Rv) GN=qcrB PE=1 SV=1;A0A0H3M6M5_MYCBP Probable Ubiquinol-cytochrome C reductase QcrB (Cytochrome B subunit) OS=Mycobacterium bovis (strain BCG / P	intermediary metabolism and respiration	Rv2196	P9WP37	A0A0H3M6M5	61.014	31.1	20.7075	22.077	22.1154	23.8312	22.3103	23.3138	19.9929	21.5317	21.2938	20.2413	22.0662	22.6346	14	8	6	12	12	8	13	2	7	5	2	9	4	0	232.22
O33182_MYCTU Phosphate ABC transporter substrate-binding protein OS=Mycobacterium tuberculosis (strain ATCC 25618 / H37Rv) GN=Rv1680 PE=1 SV=1;A0A0H3M6M8_MYCBP Uncharacterized protein OS=Mycobacterium bovis (strain BCG / Pasteur 1173P2) GN=BCG_1718 PE=4 SV	Conserved hypotheticals	Rv1680	O33182	A0A0H3M6M8	30.214	51.5	21.1103	21.6608	22.1145	21.2491	17.9054	23.2283	22.1949	21.6993	22.3407	21.9908	18.0907	19.048	8	3	2	2	3	4	4	2	4	2	4	3	2	0	85.748
O33193_MYCTU Uncharacterized protein OS=Mycobacterium tuberculosis (strain ATCC 25618 / H37Rv) GN=Rv1691 PE=1 SV=1;A0A0H3M6N4_MYCBP Uncharacterized protein OS=Mycobacterium bovis (strain BCG / Pasteur 1173P2) GN=BCG_1729 PE=4 SV=1	Conserved hypotheticals	Rv1691	O33193	A0A0H3M6N4	26.682	28	19.5245	21.5357	17.5953	19.163	20.8398	19.962	20.2414	18.9377	19.9448	20.7879	18.9364	18.4019	5	1	1	0	0	5	2	1	0	0	1	2	0	0	44.756
RECN_MYCTU DNA repair protein RecN OS=Mycobacterium tuberculosis (strain ATCC 25618 / H37Rv) GN=recN PE=1 SV=1;A0A0H3M6N8_MYCBP DNA repair protein RecN OS=Mycobacterium bovis (strain BCG / Pasteur 1173P2) GN=recN PE=3 SV=1	information pathways	Rv1696	P9WHI7	A0A0H3M6N8	62.228	9.4	17.9104	16.5758	18.1847	17.8411	17.7645	18.7549	20.1065	19.0128	19.9125	20.0067	17.4097	17.9156	3	1	1	1	1	3	1	0	0	1	1	1	0	0	9.8213
A0A0H3M6P1_MYCBP Uncharacterized protein OS=Mycobacterium bovis (strain BCG / Pasteur 1173P2) GN=BCG_2584 PE=4 SV=1; Y2561_MYCTU Uncharacterised protein Rv2561/Rv2562	Conserved hypotheticals	Rv2561/Rv2562	A0A0H3M6P1	P9WL99	27.511	21.6	23.4401	18.6526	23.0921	21.8809	18.4788	20.7764	20.2838	21.8333	19.0301	18.908	18.2185	22.147	3	2	0	2	3	0	1	0	1	1	1	0	2	0	21.422
Y2576_MYCTU Uncharacterized protein Rv2576c OS=Mycobacterium tuberculosis (strain ATCC 25618 / H37Rv) GN=Rv2576c PE=1 SV=1;A0A0H3M6Q2_MYCBP Possible conserved membrane protein OS=Mycobacterium bovis (strain BCG / Pasteur 1173P2) GN=BCG_2599c PE=4 SV=1	cell wall and cell processes	Rv2576c	P9WL83	A0A0H3M6Q2	15.793	24	25.1837	24.1553	24.8088	22.9672	19.1436	25.1775	20.6616	24.4648	24.3941	23.8881	18.6572	26.6505	1	1	1	1	1	0	1	1	1	1	1	1	1	0	16.579
RELA_MYCTU Bifunctional (p)ppGpp synthase/hydrolase RelA OS=Mycobacterium tuberculosis (strain ATCC 25618 / H37Rv) GN=relA PE=1 SV=1;A0A0H3M6Q9_MYCBP Probable GTP pyrophosphokinase relA OS=Mycobacterium bovis (strain BCG / Pasteur 1173P2) GN=relA PE=3 SV=1	intermediary metabolism and respiration	Rv2583c	P9WHG9	A0A0H3M6Q9	81.826	4.3	19.5165	19.6997	19.5161	20.6593	19.5521	20.0121	19.4897	18.1484	20.1823	18.6942	20.1691	18.8166	3	2	2	2	3	0	3	0	1	2	0	2	0	0	8.6048
ASNH_MYCTU Putative asparagine synthetase [glutamine-hydrolyzing] OS=Mycobacterium tuberculosis (strain ATCC 25618 / H37Rv) GN=asnB PE=1 SV=1;A0A0H3M6R2_MYCBP Probable asparagine synthetase AsnB OS=Mycobacterium bovis (strain BCG / Pasteur 1173P2) GN=asnB	intermediary metabolism and respiration	Rv2201	P9WN33	A0A0H3M6R2	72.149	13.3	21.1674	20.3561	22.5307	21.4303	17.4902	21.2656	18.8029	19.0354	20.985	19.611	20.4824	20.0266	5	2	1	2	5	1	3	0	1	2	0	2	2	0	43.119
GABT_MYCTU 4-aminobutyrate aminotransferase OS=Mycobacterium tuberculosis (strain ATCC 25618 / H37Rv) GN=gabT PE=1 SV=1;A0A0H3M6R4_MYCBP 4-aminobutyrate aminotransferase gabT OS=Mycobacterium bovis (strain BCG / Pasteur 1173P2) GN=gabT PE=3 SV=1	intermediary metabolism and respiration	Rv2589	P9WQ79	A0A0H3M6R4	46.812	32.1	17.7422	18.8658	17.3464	19.4139	17.0481	19.1775	20.3757	19.3432	19.2472	20.6043	19.3742	19.0334	9	0	1	1	3	4	4	1	0	0	0	4	3	0	29.307
EPHD_MYCTU Probable oxidoreductase EphD OS=Mycobacterium tuberculosis (strain ATCC 25618 / H37Rv) GN=ephD PE=1 SV=1;A0A0H3M6S0_MYCBP Possible short-chain dehydrogenase EphD OS=Mycobacterium bovis (strain BCG / Pasteur 1173P2) GN=ephD PE=4 SV=1	virulence, detoxification and adaptation	Rv2214c	P9WGS3	A0A0H3M6S0	64.029	35.6	22.3665	22.6296	22.5768	25.0388	20.0789	25.1555	22.6336	22.6824	22.5553	22.4198	23.1904	20.8415	12	6	3	6	8	7	6	2	5	4	2	5	2	0	99.779
Y2597_MYCTU Uncharacterized protein Rv2597 OS=Mycobacterium tuberculosis (strain ATCC 25618 / H37Rv) GN=Rv2597 PE=1 SV=1;A0A0H3M6S2_MYCBP Probable membrane protein OS=Mycobacterium bovis (strain BCG / Pasteur 1173P2) GN=BCG_2620 PE=4 SV=1	cell wall and cell processes	Rv2597	P9WL73	A0A0H3M6S2	21.943	51	17.8272	22.1433	20.8327	18.559	20.7163	22.2467	21.8936	19.2515	19.2538	19.7555	21.9362	17.5303	6	1	2	5	1	5	3	2	1	1	1	5	0	0	16.466
PKNF_MYCTU Serine/threonine-protein kinase PknF OS=Mycobacterium tuberculosis (strain ATCC 25618 / H37Rv) GN=pknF PE=1 SV=1;A0A0H3M6S7_MYCBP Anchored-membrane serine/threonine-protein kinase pknF OS=Mycobacterium bovis (strain BCG / Pasteur 1173P2) GN=pknF	Regulatory proteins	Rv1746	P9WI75	A0A0H3M6S7	50.668	29.6	25.0663	24.5416	24.8894	24.4047	25.5347	24.8518	24.207	23.1091	24.0366	23.9332	23.1777	23.7904	7	3	3	6	4	4	6	2	2	2	3	5	3	0	31.504
GLNA1_MYCTU Glutamine synthetase 1 OS=Mycobacterium tuberculosis (strain ATCC 25618 / H37Rv) GN=glnA1 PE=1 SV=1;A0A0H3M6S8_MYCBP Glutamine synthetase OS=Mycobacterium bovis (strain BCG / Pasteur 1173P2) GN=glnA1 PE=3 SV=1	intermediary metabolism and respiration	Rv2220	P9WN39	A0A0H3M6S8	53.569	80.1	29.0107	28.2698	29.2093	28.8457	28.9563	29.1481	28.2033	28.3996	28.5762	28.3632	28.8727	27.9579	25	23	17	23	16	15	21	18	13	16	14	23	21	0	323.31
A0A0H3M6T2_MYCBP Probable oxidoreductase OS=Mycobacterium bovis (strain BCG / Pasteur 1173P2) GN=BCG_1790 PE=4 SV=1;O65936_MYCTU Probable oxidoreductase OS=Mycobacterium tuberculosis (strain ATCC 25618 / H37Rv) GN=Rv1751 PE=1 SV=1	intermediary metabolism and respiration	Rv1751	A0A0H3M6T2	O65936	50.395	15	23.5948	22.2837	24.284	22.8778	16.3268	22.5197	19.9521	21.2822	23.003	21.4496	21.898	20.19	5	2	2	2	4	2	2	0	3	2	2	3	1	0	14.276
A0A0H3M6T3_MYCBP Uncharacterized protein OS=Mycobacterium bovis (strain BCG / Pasteur 1173P2) GN=BCG_2243 PE=4 SV=1;Y2226_MYCTU Uncharacterized protein Rv2226 OS=Mycobacterium tuberculosis (strain ATCC 25618 / H37Rv) GN=Rv2226 PE=1 SV=1	Conserved hypotheticals	Rv2226	A0A0H3M6T3	P9WLH9	56.332	60	23.1741	23.5231	23.4339	22.1817	25.2089	22.8619	23.2324	20.3407	22.3748	21.8609	24.0871	24.2959	20	11	3	13	5	16	14	3	2	4	3	14	10	0	322.83
GCH1L_MYCTU GTP cyclohydrolase 1 type 2 homolog OS=Mycobacterium tuberculosis (strain ATCC 25618 / H37Rv) GN=Rv2230c PE=1 SV=1;A0A0H3M6T9_MYCBP GTP cyclohydrolase 1 type 2 homolog OS=Mycobacterium bovis (strain BCG / Pasteur 1173P2) GN=BCG_2248c PE=3 SV=1	Conserved hypotheticals	Rv2230c	P9WFM1	A0A0H3M6T9	39.597	47	22.5762	22.6714	22.2597	23.0117	23.9188	24.4109	19.3521	22.7969	23.4694	23.4354	22.4323	19.1681	10	3	2	5	3	7	5	1	2	3	3	3	1	0	56.854
Y2623_MYCTU Universal stress protein Rv2623 OS=Mycobacterium tuberculosis (strain ATCC 25618 / H37Rv) GN=Rv2623 PE=1 SV=1;A0A0H3M6U9_MYCBP Uncharacterized protein OS=Mycobacterium bovis (strain BCG / Pasteur 1173P2) GN=TB31.7 PE=3 SV=1	virulence, detoxification and adaptation	Rv2623	P9WFD7	A0A0H3M6U9	31.652	43.4	21.0201	24.02	21.1817	24.5531	21.6107	23.8353	19.2836	25.6616	21.7312	25.4222	23.4202	22.954	7	3	4	4	6	5	5	1	4	2	3	4	4	0	55.225
FAB2_MYCTU 3-oxoacyl-[acyl-carrier-protein] synthase 2 OS=Mycobacterium tuberculosis (strain ATCC 25618 / H37Rv) GN=kasB PE=1 SV=1;A0A0H3M6V0_MYCBP 3-oxoacyl-[acyl-carrier protein] synthase 2 kasB OS=Mycobacterium bovis (strain BCG / Pasteur 1173P2) GN=kas	lipid metabolism	Rv2246	P9WQD7	A0A0H3M6V0	44.277	80.1	26.4358	25.0737	25.9279	26.9609	23.9755	25.5161	25.5027	27.3791	26.0777	26.4954	25.5698	25.9914	19	9	7	12	8	12	7	8	7	8	7	14	14	0	296.66
ECCB5_MYCTU ESX-5 secretion system ATPase EccB5 OS=Mycobacterium tuberculosis (strain ATCC 25618 / H37Rv) GN=eccB5 PE=1 SV=1;A0A0H3M6W0_MYCBP Probable conserved membrane protein OS=Mycobacterium bovis (strain BCG / Pasteur 1173P2) GN=BCG_1815 PE=4 SV=1	cell wall and cell processes	Rv1782	P9WNQ9	A0A0H3M6W0	53.721	39.9	18.9689	22.7557	21.9136	23.9089	23.6099	22.9666	18.802	22.7477	18.5852	22.5423	24.3582	22.8042	12	0	5	5	8	9	7	1	5	1	4	8	4	0	34.168
O53534_MYCTU Uncharacterized protein OS=Mycobacterium tuberculosis (strain ATCC 25618 / H37Rv) GN=Rv2260 PE=1 SV=3;A0A0H3M6W1_MYCBP Uncharacterized protein OS=Mycobacterium bovis (strain BCG / Pasteur 1173P2) GN=BCG_2278 PE=4 SV=1	Conserved hypotheticals	Rv2260	O53534	A0A0H3M6W1	22.137	58.8	24.233	22.681	23.4152	23.6453	17.6091	25.1817	23.4833	22.367	24.3335	23.1935	23.334	23.1536	4	2	3	4	3	1	3	4	1	2	1	3	2	0	61.043
Y2271_MYCTU Uncharacterized protein Rv2271 OS=Mycobacterium tuberculosis (strain ATCC 25618 / H37Rv) GN=Rv2271 PE=1 SV=1;A0A0H3M6W7_MYCBP Uncharacterized protein OS=Mycobacterium bovis (strain BCG / Pasteur 1173P2) GN=BCG_2288 PE=4 SV=1	Conserved hypotheticals	Rv2271	P9WLF7	A0A0H3M6W7	11.535	32.3	22.9833	26.5554	23.1819	18.1925	26.873	23.2956	27.384	21.1248	25.0281	18.753	21.2023	18.2145	2	2	1	2	0	1	2	1	1	1	1	2	0	0	43.419
ESXN_MYCTU ESAT-6-like protein EsxN OS=Mycobacterium tuberculosis (strain ATCC 25618 / H37Rv) GN=esxN PE=1 SV=1;A0A0H3M6W9_MYCBP ESAT-6-like protein OS=Mycobacterium bovis (strain BCG / Pasteur 1173P2) GN=esxN PE=3 SV=1;ESXO_MYCTU ESAT-6-like protein EsxO	cell wall and cell processes	Rv2346c	P9WNJ3	A0A0H3M6W9	9.9418	77.7	24.6538	27.4775	25.687	24.5453	23.1754	26.5073	27.8729	24.6177	27.2445	26.22	27.271	27.3526	2	2	2	2	2	2	2	1	2	1	1	2	2	0	176.98
ECCA5_MYCTU ESX-5 secretion system protein EccA5 OS=Mycobacterium tuberculosis (strain ATCC 25618 / H37Rv) GN=eccA5 PE=1 SV=1;A0A0H3M6X1_MYCBP Uncharacterized protein OS=Mycobacterium bovis (strain BCG / Pasteur 1173P2) GN=BCG_1830 PE=4 SV=1	cell wall and cell processes	Rv1798	P9WPI1	A0A0H3M6X1	67.755	23.3	19.0096	19.4884	18.9693	19.0434	19.9408	18.7147	19.884	18.3178	19.2459	20.028	21.8187	20.4973	8	1	1	3	4	5	3	0	1	0	0	4	3	0	32.957
Y1812_MYCTU NADH dehydrogenase-like protein Rv1812c OS=Mycobacterium tuberculosis (strain ATCC 25618 / H37Rv) GN=Rv1812c PE=1 SV=1;A0A0H3M6Y1_MYCBP Probable dehydrogenase OS=Mycobacterium bovis (strain BCG / Pasteur 1173P2) GN=BCG_1846c PE=4 SV=1	intermediary metabolism and respiration	Rv1812c	P9WJJ1	A0A0H3M6Y1	41.956	33.5	22.0939	21.8085	22.7338	23.1056	19.5503	22.8369	22.3344	21.5025	22.8524	21.9046	22.4691	18.6847	8	2	3	4	6	4	5	2	2	4	3	4	2	0	52.014
AFTC_MYCTU Alpha-(1->3)-arabinofuranosyltransferase OS=Mycobacterium tuberculosis (strain ATCC 25618 / H37Rv) GN=aftC PE=1 SV=1;A0A0H3M6Y3_MYCBP Probable conserved transmembrane protein OS=Mycobacterium bovis (strain BCG / Pasteur 1173P2) GN=BCG_2686 PE=4	cell wall and cell processes	Rv2673	P9WMZ7	A0A0H3M6Y3	48.914	24.9	22.6844	20.1066	22.577	22.6942	18.6399	22.1711	19.4825	22.1502	21.9676	21.1547	20.1547	21.0437	6	3	3	4	3	2	2	1	2	2	2	1	4	0	94.172
I6YA03_MYCTU Enoyl-CoA hydratase OS=Mycobacterium tuberculosis (strain ATCC 25618 / H37Rv) GN=echA15 PE=1 SV=1;A0A0H3M6Y7_MYCBP Probable enoyl-CoA hydratase echA15 OS=Mycobacterium bovis (strain BCG / Pasteur 1173P2) GN=BCG_2692 PE=3 SV=1	lipid metabolism	Rv2679	I6YA03	A0A0H3M6Y7	29.635	56.9	23.2901	24.6681	23.1905	24.7736	20.8073	24.671	24.7173	24.3238	23.2179	25.0869	24.5439	23.1648	10	3	5	8	6	6	4	3	4	5	5	9	8	0	69.812
Y2298_MYCTU Uncharacterized oxidoreductase Rv2298 OS=Mycobacterium tuberculosis (strain ATCC 25618 / H37Rv) GN=Rv2298 PE=1 SV=1;A0A0H3M6Y9_MYCBP Uncharacterized protein OS=Mycobacterium bovis (strain BCG / Pasteur 1173P2) GN=BCG_2314 PE=4 SV=1	Conserved hypotheticals	Rv2298	P9WQA7	A0A0H3M6Y9	34.986	64.7	25.0118	25.7416	24.372	26.5179	24.3471	26.8098	25.2381	26.0077	25.057	26.1925	26.4463	23.6976	16	11	8	14	10	15	12	9	10	10	10	14	12	0	157.92
P71898_MYCTU Conserved protein OS=Mycobacterium tuberculosis (strain ATCC 25618 / H37Rv) GN=Rv2314c PE=1 SV=1;A0A0H3M703_MYCBP Uncharacterized protein OS=Mycobacterium bovis (strain BCG / Pasteur 1173P2) GN=BCG_2335c PE=4 SV=1	Conserved hypotheticals	Rv2314c	P71898	A0A0H3M703	48.711	21.2	23.9383	20.0518	24.2943	20.4909	18.3239	20.0065	20.6139	20.7318	23.148	18.495	19.3866	18.4272	7	2	2	2	4	3	3	2	4	2	2	5	2	0	32.293
I6Y1H7_MYCTU DNA-binding protein OS=Mycobacterium tuberculosis (strain ATCC 25618 / H37Rv) GN=Rv2690c PE=1 SV=1;A0A0H3M707_MYCBP Probable conserved integral membrane alanine and valine and leucine rich protein OS=Mycobacterium bovis (strain BCG / Pasteur 1	cell wall and cell processes	Rv2690c	I6Y1H7	A0A0H3M707	70.801	7.3	19.8873	19.6738	19.9344	20.485	18.4955	19.8407	21.005	19.4669	19.6896	17.7782	19.094	18.4759	3	1	1	1	2	0	1	0	1	1	1	2	0	0	9.6587
P71888_MYCTU AsnC family transcriptional regulator OS=Mycobacterium tuberculosis (strain ATCC 25618 / H37Rv) GN=Rv2324 PE=1 SV=1;A0A0H3M709_MYCBP Probable transcriptional regulatory protein (Probably asnC-family) OS=Mycobacterium bovis (strain BCG / Pasteu	Regulatory proteins	Rv2324	P71888	A0A0H3M709	16.351	33.1	22.163	19.0282	22.2939	21.6285	18.6509	21.927	20.0654	18.968	21.7489	19.6664	17.5912	19.6084	2	2	0	2	2	0	2	1	1	2	0	0	0	0	12.316
P95159_MYCTU Oxidoreductase OS=Mycobacterium tuberculosis (strain ATCC 25618 / H37Rv) GN=Rv1855c PE=1 SV=2;A0A0H3M717_MYCBP Possible oxidoreductase OS=Mycobacterium bovis (strain BCG / Pasteur 1173P2) GN=BCG_1891c PE=4 SV=1	intermediary metabolism and respiration	Rv1855c	P95159	A0A0H3M717	33.22	46.6	21.4923	21.461	20.9334	22.9633	20.3707	22.0597	21.7204	22.9611	21.4256	22.7691	23.0563	21.2467	10	3	4	4	5	5	5	2	4	5	4	7	6	0	47.717
SUHB_MYCTU Inositol-1-monophosphatase SuhB OS=Mycobacterium tuberculosis (strain ATCC 25618 / H37Rv) GN=suhB PE=1 SV=1;A0A0H3M720_MYCBP Possible extragenic suppressor protein suhB OS=Mycobacterium bovis (strain BCG / Pasteur 1173P2) GN=suhB PE=4 SV=1	intermediary metabolism and respiration	Rv2701c	P9WKI9	A0A0H3M720	30.027	29	19.7244	19.4385	16.3273	19.3127	18.6043	19.2458	21.3327	18.9395	18.9469	20.0295	21.3374	19.2562	4	0	0	1	1	2	1	0	1	1	1	2	3	0	67.897
P95238_MYCTU Uncharacterized protein OS=Mycobacterium tuberculosis (strain ATCC 25618 / H37Rv) GN=Rv2342 PE=1 SV=3;A0A0H3M722_MYCBP Uncharacterized protein OS=Mycobacterium bovis (strain BCG / Pasteur 1173P2) GN=BCG_2365 PE=4 SV=1	Conserved hypotheticals	Rv2342	P95238	A0A0H3M722	9.2055	30.6	23.4043	22.0878	21.9714	21.5168	17.7178	18.5285	19.9649	22.327	20.2411	19.9583	18.7177	18.2753	2	2	1	1	1	1	1	1	1	1	1	0	1	0	14.639
SYG_MYCTU Glycine--tRNA ligase OS=Mycobacterium tuberculosis (strain ATCC 25618 / H37Rv) GN=glyQS PE=1 SV=1;A0A0H3M725_MYCBP Glycine--tRNA ligase OS=Mycobacterium bovis (strain BCG / Pasteur 1173P2) GN=glyS PE=3 SV=1	information pathways	Rv2357c	P9WFV7	A0A0H3M725	52.937	56.8	25.8173	24.8292	26.7307	25.6204	24.0506	25.8786	25.4396	24.3571	26.1211	25.5921	25.4557	24.5708	18	13	6	9	8	12	9	6	5	8	4	12	10	0	63.859
AMIA2_MYCTU Putative amidase AmiA2 OS=Mycobacterium tuberculosis (strain ATCC 25618 / H37Rv) GN=amiA2 PE=1 SV=1;A0A0H3M730_MYCBP Probable amidase amiA2 OS=Mycobacterium bovis (strain BCG / Pasteur 1173P2) GN=amiA2 PE=3 SV=1	intermediary metabolism and respiration	Rv2363	P9WQ99	A0A0H3M730	50.883	34.5	24.7378	22.6966	23.5591	24.1111	19.0811	24.0596	22.9906	23.9256	23.9476	23.7199	22.5362	21.5233	11	4	4	7	6	7	8	3	5	4	5	6	6	0	101.75
MTB12_MYCTU Low molecular weight antigen MTB12 OS=Mycobacterium tuberculosis (strain ATCC 25618 / H37Rv) GN=mtb12 PE=1 SV=1;A0A0H3M735_MYCBP Low molecular weight antigen cfp2 OS=Mycobacterium bovis (strain BCG / Pasteur 1173P2) GN=cfp2 PE=4 SV=1	cell wall and cell processes	Rv2376c	P9WIN7	A0A0H3M735	16.635	41.1	24.3432	25.319	23.2963	23.5715	23.1012	25.3874	25.2371	25.0163	21.2794	22.7083	23.829	21.7688	3	2	2	3	2	3	3	2	2	1	1	3	3	0	65.167
IDER_MYCTU Iron-dependent repressor IdeR OS=Mycobacterium tuberculosis (strain ATCC 25618 / H37Rv) GN=ideR PE=1 SV=1;A0A0H3M737_MYCBP Iron-dependent repressor and activator ideR OS=Mycobacterium bovis (strain BCG / Pasteur 1173P2) GN=ideR PE=4 SV=1	Regulatory proteins	Rv2711	P9WMH1	A0A0H3M737	25.233	66.1	24.8859	25.329	24.6049	22.4323	26.0296	23.9921	26.1026	23.9458	24.7251	25.1031	26.2411	25.4861	11	9	5	8	5	11	7	4	4	6	2	9	8	0	124.17
SIR_MYCTU Sulfite reductase [ferredoxin] OS=Mycobacterium tuberculosis (strain ATCC 25618 / H37Rv) GN=sir PE=1 SV=1;A0A0H3M745_MYCBP Probable ferredoxin-dependant nitrite reductase nirA OS=Mycobacterium bovis (strain BCG / Pasteur 1173P2) GN=nirA PE=3 SV=1	intermediary metabolism and respiration	Rv2391	P9WJ03	A0A0H3M745	62.111	27.6	24.4349	23.3538	23.1299	25.3672	23.9413	25.465	24.7259	25.9129	24.4651	23.9846	24.899	23.7528	14	9	4	9	7	11	7	3	4	4	2	9	4	0	145.48
PKNB_MYCTU Serine/threonine-protein kinase PknB OS=Mycobacterium tuberculosis (strain ATCC 25618 / H37Rv) GN=pknB PE=1 SV=1;A0A0H3M746_MYCBP Transmembrane serine/threonine-protein kinase B pknB OS=Mycobacterium bovis (strain BCG / Pasteur 1173P2) GN=pknB P	Regulatory proteins	Rv0014c	P9WI81	A0A0H3M746	66.509	41.5	23.8063	23.1645	24.459	23.8671	25.4179	24.2902	24.3897	24.3437	24.3503	23.7633	23.9591	24.3156	18	7	3	8	9	10	8	3	7	5	5	7	5	0	123.65
BFR_MYCTU Bacterioferritin OS=Mycobacterium tuberculosis (strain ATCC 25618 / H37Rv) GN=bfr PE=1 SV=1;A0A0H3M748_MYCBP Bacterioferritin OS=Mycobacterium bovis (strain BCG / Pasteur 1173P2) GN=bfrA PE=3 SV=1	intermediary metabolism and respiration	Rv1876	P9WPQ9	A0A0H3M748	18.34	85.5	21.9089	24.3179	21.6015	23.1758	24.4847	23.5464	22.4326	23.609	22.6314	23.5838	24.7551	22.362	10	6	2	7	6	8	7	2	2	2	3	6	4	0	71.038
A0A0H3M751_MYCBP Uncharacterized protein OS=Mycobacterium bovis (strain BCG / Pasteur 1173P2) GN=TB39.8 PE=4 SV=1;FHAA_MYCTU FHA domain-containing protein FhaA OS=Mycobacterium tuberculosis (strain ATCC 25618 / H37Rv) GN=fhaA PE=1 SV=1	Regulatory proteins	Rv0020c	A0A0H3M751	P71590	56.003	83.7	24.7659	24.8865	25.0048	23.3122	27.3651	23.9656	25.0751	24.2911	23.8881	24.7299	24.3471	24.8302	28	20	8	21	15	26	21	9	9	11	7	19	20	0	323.31
CP140_MYCTU Putative cytochrome P450 140 OS=Mycobacterium tuberculosis (strain ATCC 25618 / H37Rv) GN=cyp140 PE=1 SV=1;A0A0H3M755_MYCBP Probable cytochrome p450 140 CYP140 OS=Mycobacterium bovis (strain BCG / Pasteur 1173P2) GN=cyp140 PE=3 SV=1	intermediary metabolism and respiration	Rv1880c	P9WPL9	A0A0H3M755	48.871	18.5	19.1114	21.4309	22.053	22.0471	17.8211	22.0307	19.0638	19.9012	21.2028	18.8403	17.7472	18.9648	5	1	3	3	5	0	3	0	1	2	0	1	1	0	40.811
O33237_MYCTU Probable conserved transmembrane protein OS=Mycobacterium tuberculosis (strain ATCC 25618 / H37Rv) GN=Rv2732c PE=1 SV=1;A0A0H3M758_MYCBP Probable conserved transmembrane protein OS=Mycobacterium bovis (strain BCG / Pasteur 1173P2) GN=BCG_2745c	cell wall and cell processes	Rv2732c	O33237	A0A0H3M758	21.989	20.1	19.3298	19.438	18.6776	20.7365	21.013	19.6077	18.7407	19.1771	19.1964	19.2872	19.2541	18.546	3	1	1	2	1	2	1	1	1	1	1	1	0	0	26.698
SCMU_MYCTU Secreted chorismate mutase OS=Mycobacterium tuberculosis (strain ATCC 25618 / H37Rv) GN=Rv1885c PE=1 SV=1;A0A0H3M762_MYCBP Chorismate mutase OS=Mycobacterium bovis (strain BCG / Pasteur 1173P2) GN=BCG_1922c PE=4 SV=1	intermediary metabolism and respiration	Rv1885c	P9WIB9	A0A0H3M762	21.945	34.7	19.3201	19.7154	20.6412	21.699	25.2932	22.669	20.8092	20.9566	21.4455	21.1243	20.9283	21.2325	5	4	1	4	3	4	4	2	2	2	2	4	2	0	55.199
GPGP_MYCTU Glucosyl-3-phosphoglycerate phosphatase OS=Mycobacterium tuberculosis (strain ATCC 25618 / H37Rv) GN=gpgP PE=1 SV=1;A0A0H3M763_MYCBP Probable phosphoglycerate mutase OS=Mycobacterium bovis (strain BCG / Pasteur 1173P2) GN=BCG_2435c PE=3 SV=1	intermediary metabolism and respiration	Rv2419c	P9WIC7	A0A0H3M763	24.174	48	23.313	19.4056	24.0267	24.3042	18.1772	23.7119	24.0174	23.5866	19.336	23.6722	22.9578	21.9339	6	2	0	3	2	3	2	2	2	1	2	4	4	0	17.929
P71699_MYCTU Possible transcriptional regulatory protein (Probably MarR-family) OS=Mycobacterium tuberculosis (strain ATCC 25618 / H37Rv) GN=Rv0042c PE=1 SV=1;A0A0H3M764_MYCBP Possible transcriptional regulatory protein (MarR-FAMILY) OS=Mycobacterium bovis	Regulatory proteins	Rv0042c	P71699	A0A0H3M764	22.411	17.3	19.3837	19.5575	19.0336	20.9068	20.0194	18.2535	20.6088	20.3822	20.4605	19.3526	18.9704	19.0038	3	3	1	2	1	3	1	0	1	0	1	1	0	0	13.397
I6YA47_MYCTU Signal transduction histidine kinase OS=Mycobacterium tuberculosis (strain ATCC 25618 / H37Rv) GN=Rv2738c PE=1 SV=1;A0A0H3M767_MYCBP Uncharacterized protein OS=Mycobacterium bovis (strain BCG / Pasteur 1173P2) GN=BCG_2752c PE=4 SV=1	Conserved hypotheticals	Rv2738c	I6YA47	A0A0H3M767	7.5514	66.2	24.0739	23.0344	24.3719	23.4824	18.1236	23.1456	23.0762	24.0266	22.5168	23.5094	19.63	22.9423	3	2	1	2	1	2	1	1	1	1	1	2	1	0	32.51
P71704_MYCTU Conserved protein OS=Mycobacterium tuberculosis (strain ATCC 25618 / H37Rv) GN=Rv0047c PE=1 SV=1;A0A0H3M768_MYCBP Uncharacterized protein OS=Mycobacterium bovis (strain BCG / Pasteur 1173P2) GN=BCG_0078c PE=4 SV=1	Conserved hypotheticals	Rv0047c	P71704	A0A0H3M768	20.408	42.8	21.7339	21.924	22.03	21.5609	20.9337	23.0752	22.1923	23.0677	21.9033	22.02	21.9815	18.1675	5	4	4	4	3	4	4	4	2	3	3	3	0	0	31.282
PE25_MYCTU PE-PGRS family protein PE25 OS=Mycobacterium tuberculosis (strain ATCC 25618 / H37Rv) GN=PE25 PE=1 SV=1;A0A0H3M771_MYCBP PE family protein OS=Mycobacterium bovis (strain BCG / Pasteur 1173P2) GN=PE25 PE=4 SV=1	PE/PPE families	Rv2431c	I6X486	A0A0H3M771	10.687	77.8	22.3431	22.077	18.8587	20.2237	21.1363	22.5592	20.331	18.6607	20.2951	19.6384	22.0636	19.2779	4	2	2	1	1	3	2	1	1	1	1	3	1	0	54.297
I6Y6S3_MYCTU Conserved protein OS=Mycobacterium tuberculosis (strain ATCC 25618 / H37Rv) GN=Rv0052 PE=1 SV=2;A0A0H3M772_MYCBP Uncharacterized protein OS=Mycobacterium bovis (strain BCG / Pasteur 1173P2) GN=BCG_0083 PE=4 SV=1	Conserved hypotheticals	Rv0052	I6Y6S3	A0A0H3M772	20.387	34.8	18.8483	20.8189	20.2746	20.6945	19.4177	22.0319	19.6281	19.5119	21.3352	20.734	21.1989	18.0116	4	1	2	2	3	1	2	1	1	2	2	3	1	0	16.187
O53605_MYCTU Uncharacterized protein OS=Mycobacterium tuberculosis (strain ATCC 25618 / H37Rv) GN=Rv0060 PE=1 SV=1;A0A0H3M776_MYCBP Uncharacterized protein OS=Mycobacterium bovis (strain BCG / Pasteur 1173P2) GN=BCG_0091 PE=4 SV=1	Conserved hypotheticals	Rv0060	O53605	A0A0H3M776	38.563	37.5	17.9517	19.6394	21.4599	23.1613	21.5618	22.7032	20.0024	22.2017	19.8835	22.6456	23.2413	22.1634	10	3	3	4	4	8	4	3	4	2	4	3	3	0	52.715
P71906_MYCTU C4-dicarboxylate transporter OS=Mycobacterium tuberculosis (strain ATCC 25618 / H37Rv) GN=dctA PE=4 SV=1;A0A0H3M781_MYCBP Probable C4-dicarboxylate-transport transmembrane protein dctA OS=Mycobacterium bovis (strain BCG / Pasteur 1173P2) GN=dc	cell wall and cell processes	Rv2443	P71906	A0A0H3M781	50.987	11.2	21.9769	19.8679	22.9166	22.1114	17.299	18.7075	19.3222	19.1914	19.4641	19.6318	18.0081	18.3609	2	2	1	2	2	0	1	0	1	1	1	0	1	0	11.027
GLYA2_MYCTU Serine hydroxymethyltransferase 2 OS=Mycobacterium tuberculosis (strain ATCC 25618 / H37Rv) GN=glyA2 PE=1 SV=1;A0A0H3M782_MYCBP Serine hydroxymethyltransferase OS=Mycobacterium bovis (strain BCG / Pasteur 1173P2) GN=glyA2 PE=3 SV=1	intermediary metabolism and respiration	Rv0070c	P9WGI7	A0A0H3M782	45.525	12.9	17.9238	20.7284	17.394	18.9923	19.8169	18.8228	19.2567	18.2926	19.1432	18.8935	20.4603	19.5717	4	1	2	1	3	4	3	1	1	0	1	3	1	0	89.551
KORA_MYCTU 2-oxoglutarate oxidoreductase subunit KorA OS=Mycobacterium tuberculosis (strain ATCC 25618 / H37Rv) GN=korA PE=1 SV=3;A0A0H3M788_MYCBP Probable oxidoreductase (Alpha subunit) OS=Mycobacterium bovis (strain BCG / Pasteur 1173P2) GN=BCG_2475c PE=	intermediary metabolism and respiration	Rv2455c	O53182	A0A0H3M788	69.182	57.3	23.5701	25.073	24.4867	24.6451	23.1808	24.8371	24.3734	23.6855	24.0646	24.4404	24.8349	24.1305	20	6	6	12	10	15	11	5	8	7	6	13	9	0	161.52
CLPP1_MYCTU ATP-dependent Clp protease proteolytic subunit 1 OS=Mycobacterium tuberculosis (strain ATCC 25618 / H37Rv) GN=clpP1 PE=1 SV=1;A0A0H3M791_MYCBP ATP-dependent Clp protease proteolytic subunit OS=Mycobacterium bovis (strain BCG / Pasteur 1173P2) G	intermediary metabolism and respiration	Rv2461c	P9WPC5	A0A0H3M791	21.707	55.5	27.1434	26.8477	28.1358	26.3764	25.951	27.4442	27.0295	26.421	27.9438	27.6948	26.7053	27.9241	7	6	5	7	7	6	6	5	7	6	3	7	6	0	159.21
L7N655_MYCTU Aminopeptidase N OS=Mycobacterium tuberculosis (strain ATCC 25618 / H37Rv) GN=pepN PE=1 SV=1;A0A0H3M795_MYCBP Probable aminopeptidase N pepN OS=Mycobacterium bovis (strain BCG / Pasteur 1173P2) GN=pepN PE=4 SV=1	intermediary metabolism and respiration	Rv2467	L7N655	A0A0H3M795	94.284	55.9	23.0519	23.7877	23.7602	24.6216	21.9465	24.4583	23.5372	23.7822	23.9946	24.0165	24.2211	23.1869	29	8	8	16	15	16	12	7	10	7	10	16	14	0	163.98
Y088_MYCTU Uncharacterized protein Rv0088 OS=Mycobacterium tuberculosis (strain ATCC 25618 / H37Rv) GN=Rv0088 PE=1 SV=1;A0A0H3M796_MYCBP Uncharacterized protein OS=Mycobacterium bovis (strain BCG / Pasteur 1173P2) GN=BCG_0121 PE=4 SV=1	lipid metabolism	Rv0088	P9WM73	A0A0H3M796	24.649	40.2	25.0468	24.357	23.3926	24.5861	25.2291	25.0985	24.5456	25.171	23.7563	25.7689	24.6689	23.0589	8	6	5	6	5	6	7	6	5	6	2	8	5	0	98.003
O53961_MYCTU Conserved protein OS=Mycobacterium tuberculosis (strain ATCC 25618 / H37Rv) GN=Rv1919c PE=1 SV=3;A0A0H3M797_MYCBP Uncharacterized protein OS=Mycobacterium bovis (strain BCG / Pasteur 1173P2) GN=BCG_1958c PE=4 SV=1	Conserved hypotheticals	Rv1919c	O53961	A0A0H3M797	16.803	57.8	20.6106	21.6172	19.9545	22.0666	21.3981	20.7585	21.3948	22.2335	20.8736	21.2311	23.873	21.4849	9	5	4	5	5	5	5	4	4	5	4	4	5	0	20.836
A0A0H3M7A3_MYCBP Probable macrolide-transport ATP-binding protein ABC transporter OS=Mycobacterium bovis (strain BCG / Pasteur 1173P2) GN=BCG_2497c PE=4 SV=1;ETTA_MYCTU Energy-dependent translational throttle protein EttA OS=Mycobacterium tuberculosis (str	cell wall and cell processes	Rv2477c	A0A0H3M7A3	P9WQK3	61.919	62	24.874	25.6204	25.1873	24.9152	25.5862	24.3706	25.1647	25.1612	26.0802	24.7643	26.043	25.8558	23	15	12	18	13	20	13	10	7	11	7	19	15	0	261.65
O53630_MYCTU Uncharacterized protein OS=Mycobacterium tuberculosis (strain ATCC 25618 / H37Rv) GN=Rv0108c PE=1 SV=1;A0A0H3M7A8_MYCBP Uncharacterized protein OS=Mycobacterium bovis (strain BCG / Pasteur 1173P2) GN=BCG_0141c PE=4 SV=1	Conserved hypotheticals	Rv0108c	O53630	A0A0H3M7A8	7.5905	39.1	17.3125	20.3432	16.8018	18.2311	18.5436	16.8143	18.8125	19.0399	17.9242	19.3935	17.7968	19.7217	3	2	1	2	1	3	2	0	1	1	1	1	0	0	12.289
O07169_MYCTU Probable fatty-acid-CoA ligase FadD7 (Fatty-acid-CoA synthetase) (Fatty-acid-CoA synthase) OS=Mycobacterium tuberculosis (strain ATCC 25618 / H37Rv) GN=fadD7 PE=1 SV=4;A0A0H3M7B7_MYCBP Probable fatty-acid-CoA ligase fadD7 OS=Mycobacterium bovi	lipid metabolism	Rv0119	O07169	A0A0H3M7B7	55.158	22.5	23.5362	21.6011	23.6826	22.0211	18.3179	22.003	20.6373	18.2824	22.058	18.7844	20.5715	17.7303	5	3	1	4	4	1	4	0	1	3	2	3	1	0	24.4
I6Y9I3_MYCTU Probable short-chain type dehydrogenase/reductase OS=Mycobacterium tuberculosis (strain ATCC 25618 / H37Rv) GN=Rv2509 PE=1 SV=1;A0A0H3M7C2_MYCBP Putative short-chain type dehydrogenase/reductase OS=Mycobacterium bovis (strain BCG / Pasteur 117	intermediary metabolism and respiration	Rv2509	I6Y9I3	A0A0H3M7C2	28.013	67.2	22.3821	23.3475	22.7225	24.9091	22.7688	23.5489	22.3428	24.0144	23.0627	23.9115	24.1111	23.4778	11	8	7	7	9	5	10	5	8	6	7	9	7	0	30.206
P95270_MYCTU Conserved protein OS=Mycobacterium tuberculosis (strain ATCC 25618 / H37Rv) GN=Rv1944c PE=1 SV=1;A0A0H3M7C3_MYCBP Uncharacterized protein OS=Mycobacterium bovis (strain BCG / Pasteur 1173P2) GN=BCG_1983c PE=4 SV=1	Conserved hypotheticals	Rv1944c	P95270	A0A0H3M7C3	20.795	61.2	22.5957	25.8617	22.973	22.0577	24.3269	25.482	26.2068	23.0712	24.2403	24.7552	26.0065	23.1959	5	3	2	3	2	4	3	2	1	2	2	3	2	0	37.999
ECH1_MYCTU Probable enoyl-CoA hydratase 1 OS=Mycobacterium tuberculosis (strain ATCC 25618 / H37Rv) GN=Rv0130 PE=1 SV=1;A0A0H3M7C4_MYCBP Uncharacterized protein OS=Mycobacterium bovis (strain BCG / Pasteur 1173P2) GN=BCG_0164 PE=4 SV=1	intermediary metabolism and respiration	Rv0130	P9WNP3	A0A0H3M7C4	16.007	42.4	24.9454	23.8579	24.8416	24.3225	18.2257	24.4681	18.779	23.983	25.4806	24.0557	23.4827	24.0308	3	1	2	2	2	1	1	1	2	2	1	2	2	0	47.28
LYS25_MYCTU Putative peptidoglycan hydrolase Rv2525c OS=Mycobacterium tuberculosis (strain ATCC 25618 / H37Rv) GN=Rv2525c PE=1 SV=1;A0A0H3M7D3_MYCBP Uncharacterized protein OS=Mycobacterium bovis (strain BCG / Pasteur 1173P2) GN=BCG_2546c PE=4 SV=1	Conserved hypotheticals	Rv2525c	I6XEI5	A0A0H3M7D3	25.369	33.8	22.2477	23.2853	22.9209	22.7461	21.9531	24.5512	24.4432	22.3998	23.697	23.8114	23.7856	23.0045	5	3	4	1	5	3	5	3	4	3	3	4	3	0	65.96
P96831_MYCTU Probable acyl-CoA dehydrogenase FadE2 OS=Mycobacterium tuberculosis (strain ATCC 25618 / H37Rv) GN=fadE2 PE=1 SV=3;A0A0H3M7D5_MYCBP Probable acyl-CoA dehydrogenase fadE2 OS=Mycobacterium bovis (strain BCG / Pasteur 1173P2) GN=fadE2 PE=3 SV=1	lipid metabolism	Rv0154c	P96831	A0A0H3M7D5	44.343	39	19.9008	19.787	19.5462	21.2456	21.7563	20.0009	19.708	20.5451	18.4302	20.2797	20.9658	20.9627	14	3	1	6	6	10	8	2	3	1	2	9	6	0	73.659
P95017_MYCTU Membrane protein OS=Mycobacterium tuberculosis (strain ATCC 25618 / H37Rv) GN=Rv2536 PE=1 SV=3;A0A0H3M7E0_MYCBP Probable conserved transmembrane protein OS=Mycobacterium bovis (strain BCG / Pasteur 1173P2) GN=BCG_2558 PE=4 SV=1	cell wall and cell processes	Rv2536	P95017	A0A0H3M7E0	24.626	36.5	18.2649	18.5777	18.5677	18.0047	22.7496	17.343	19.2045	19.3035	18.5869	19.9891	16.435	19.1417	6	4	0	5	3	5	3	0	2	1	1	2	2	0	204.82
L7N657_MYCTU Conserved protein TB18.5 OS=Mycobacterium tuberculosis (strain ATCC 25618 / H37Rv) GN=TB18.5 PE=1 SV=1;A0A0H3M7E1_MYCBP Uncharacterized protein OS=Mycobacterium bovis (strain BCG / Pasteur 1173P2) GN=TB18.5 PE=4 SV=1	Conserved hypotheticals	Rv0164	L7N657	A0A0H3M7E1	17.738	60.2	27.1459	28.7438	27.4901	28.1989	25.3628	28.3199	29.3795	28.6471	28.9358	28.3319	27.1339	27.6587	6	6	5	6	5	6	6	5	5	5	5	5	6	0	254.5
Q79FZ9_MYCTU MCE-family protein MCE1A OS=Mycobacterium tuberculosis (strain ATCC 25618 / H37Rv) GN=mce1A PE=1 SV=1;A0A0H3M7E6_MYCBP MCE-family protein mce1A OS=Mycobacterium bovis (strain BCG / Pasteur 1173P2) GN=mce1A PE=4 SV=1	virulence, detoxification and adaptation	Rv0169	Q79FZ9	A0A0H3M7E6	47.786	54.4	23.5638	24.6611	22.8691	23.1048	24.0702	24.3951	24.6738	22.2886	24.9581	23.0321	23.6684	22.3524	14	4	5	9	9	10	10	6	3	3	6	6	4	0	205.38
A0A0H3M7F0_MYCBP MCE-family protein mce1F OS=Mycobacterium bovis (strain BCG / Pasteur 1173P2) GN=mce1F PE=4 SV=1;L0T2W6_MYCTU Mammalian cell entry protein OS=Mycobacterium tuberculosis (strain ATCC 25618 / H37Rv) GN=mce1F PE=1 SV=1	virulence, detoxification and adaptation	Rv0174	A0A0H3M7F0	L0T2W6	54.021	44.9	21.774	22.9526	21.0678	22.7442	23.1119	22.8559	22.2007	21.2507	20.2085	21.9609	22.95	22.5146	14	4	2	9	5	14	5	2	5	2	3	4	2	0	115.02
Y2560_MYCTU Uncharacterized protein Rv2560 OS=Mycobacterium tuberculosis (strain ATCC 25618 / H37Rv) GN=Rv2560 PE=1 SV=1;A0A0H3M7F6_MYCBP Probable proline and glycine rich transmembrane protein OS=Mycobacterium bovis (strain BCG / Pasteur 1173P2) GN=BCG_25	cell wall and cell processes	Rv2560	P9WLA1	A0A0H3M7F6	33.124	13.8	16.599	18.4433	16.4968	19.0733	22.1806	15.957	20.383	17.8104	18.5123	19.2823	15.4388	18.4022	4	3	1	3	1	3	4	0	1	1	0	4	1	0	16.747
Y2000_MYCTU Uncharacterized protein Rv2000 OS=Mycobacterium tuberculosis (strain ATCC 25618 / H37Rv) GN=Rv2000 PE=1 SV=1;A0A0H3M7G2_MYCBP Uncharacterized protein OS=Mycobacterium bovis (strain BCG / Pasteur 1173P2) GN=BCG_2017 PE=4 SV=1	Conserved hypotheticals	Rv2000	P9WLN7	A0A0H3M7G2	59.894	5.4	21.7905	19.4919	21.1612	21.4848	18.7669	20.964	17.959	20.3877	19.6079	19.4279	18.9339	17.4119	2	1	1	1	2	0	1	0	1	1	1	1	1	0	8.8371
ILVD_MYCTU Dihydroxy-acid dehydratase OS=Mycobacterium tuberculosis (strain ATCC 25618 / H37Rv) GN=ilvD PE=1 SV=1;A0A0H3M7G4_MYCBP Dihydroxy-acid dehydratase OS=Mycobacterium bovis (strain BCG / Pasteur 1173P2) GN=ilvD PE=3 SV=1	intermediary metabolism and respiration	Rv0189c	P9WKJ5	A0A0H3M7G4	59.351	29.6	24.4629	22.8937	22.558	25.3986	22.2224	25.1382	18.4987	23.8098	22.5655	22.9518	23.7198	23.5699	10	3	3	6	4	5	4	1	2	4	1	5	9	0	158.44
O33332_MYCTU Lipid-transfer protein OS=Mycobacterium tuberculosis (strain ATCC 25618 / H37Rv) GN=ltp1 PE=1 SV=1;A0A0H3M7G5_MYCBP Probable lipid-transfer protein ltp1 OS=Mycobacterium bovis (strain BCG / Pasteur 1173P2) GN=ltp1 PE=3 SV=1	cell wall and cell processes	Rv2790c	O33332	A0A0H3M7G5	42.904	61.8	21.3336	22.5795	21.9829	21.945	22.1849	22.3548	23.0778	22.04	22.977	21.9836	23.4287	22.167	13	5	3	6	5	8	6	3	3	2	3	9	4	0	140.94
Y2005_MYCTU Universal stress protein Rv2005c OS=Mycobacterium tuberculosis (strain ATCC 25618 / H37Rv) GN=Rv2005c PE=1 SV=1;A0A0H3M7G6_MYCBP Uncharacterized protein OS=Mycobacterium bovis (strain BCG / Pasteur 1173P2) GN=BCG_2022c PE=3 SV=1	virulence, detoxification and adaptation	Rv2005c	P9WLN1	A0A0H3M7G6	30.985	29.8	23.3623	22.1283	23.648	24.288	17.8941	23.5407	22.4133	25.1061	22.7093	23.2057	22.1598	22.2999	4	1	2	2	4	2	4	2	3	2	3	3	2	0	36.084
PPIB_MYCTU Probable peptidyl-prolyl cis-trans isomerase B OS=Mycobacterium tuberculosis (strain ATCC 25618 / H37Rv) GN=ppiB PE=1 SV=1;A0A0H3M7H0_MYCBP Probable peptidyl-prolyl cis-trans isomerase B ppiB OS=Mycobacterium bovis (strain BCG / Pasteur 1173P2)	information pathways	Rv2582	P9WHW1	A0A0H3M7H0	32.371	29.9	18.2221	18.4316	23.1616	21.8839	21.77	23.0276	18.9314	19.7687	19.813	22.9902	23.3974	23.813	6	2	1	2	2	5	4	1	1	1	1	2	2	0	16.96
P71655_MYCTU Probable conserved lipoprotein LppV OS=Mycobacterium tuberculosis (strain ATCC 25618 / H37Rv) GN=lppV PE=4 SV=4;A0A0H3M7H1_MYCBP Probable conserved lipoprotein lppV OS=Mycobacterium bovis (strain BCG / Pasteur 1173P2) GN=lppV PE=4 SV=1	cell wall and cell processes	Rv2796c	P71655	A0A0H3M7H1	20.197	36.4	25.4325	22.644	25.1749	23.8519	22.4062	23.973	22.7619	23.34	24.5635	23.1104	22.8326	23.5356	5	1	2	3	2	3	3	2	2	1	1	2	1	0	57.27
Y2588_MYCTU Uncharacterized protein Rv2588c OS=Mycobacterium tuberculosis (strain ATCC 25618 / H37Rv) GN=Rv2588c PE=1 SV=1;A0A0H3M7H6_MYCBP Probable conserved membrane protein secretion factor yajC OS=Mycobacterium bovis (strain BCG / Pasteur 1173P2) GN=BC	cell wall and cell processes	Rv2588c	P9WL75	A0A0H3M7H6	12.966	86.1	22.0412	19.1733	21.8276	20.6	23.7919	20.5587	20.8569	19.1633	21.1972	19.9169	23.4278	23.2391	6	4	1	5	3	5	3	2	1	2	1	4	4	0	76.988
AP4A_MYCTU AP-4-A phosphorylase OS=Mycobacterium tuberculosis (strain ATCC 25618 / H37Rv) GN=Rv2613c PE=1 SV=1;A0A0H3M7J4_MYCBP Uncharacterized protein OS=Mycobacterium bovis (strain BCG / Pasteur 1173P2) GN=BCG_2638c PE=4 SV=1	lipid metabolism	Rv2613c	P9WMK9	A0A0H3M7J4	21.869	37.4	25.0121	22.9508	24.887	23.6446	20.3272	23.7238	23.5068	24.2969	23.6386	23.3947	23.4774	24.3789	5	2	3	2	4	5	3	3	3	3	3	3	3	0	67.368
I6XER9_MYCTU Membrane protein OS=Mycobacterium tuberculosis (strain ATCC 25618 / H37Rv) GN=Rv2617c PE=1 SV=1;A0A0H3M7J8_MYCBP Probable transmembrane protein OS=Mycobacterium bovis (strain BCG / Pasteur 1173P2) GN=BCG_2644c PE=4 SV=1	cell wall and cell processes	Rv2617c	I6XER9	A0A0H3M7J8	15.584	18.5	21.8085	21.7222	21.7015	20.7615	18.2135	21.3044	21.0698	18.2274	22.0454	20.5876	20.545	18.3961	2	2	2	2	2	1	2	2	1	2	2	2	0	0	7.504
P71625_MYCTU Uncharacterized protein OS=Mycobacterium tuberculosis (strain ATCC 25618 / H37Rv) GN=Rv2827c PE=1 SV=4;A0A0H3M7K0_MYCBP Uncharacterized protein OS=Mycobacterium bovis (strain BCG / Pasteur 1173P2) GN=BCG_2846c PE=4 SV=1	Conserved hypotheticals	Rv2827c	P71625	A0A0H3M7K0	32.347	7.8	17.854	20.3599	18.4908	21.642	20.1012	21.4658	21.4175	19.9545	19.9725	22.9944	20.8374	17.4786	2	2	1	0	2	2	2	2	1	1	2	2	0	0	3.0615
I6XES4_MYCTU Methyltransferase OS=Mycobacterium tuberculosis (strain ATCC 25618 / H37Rv) GN=Rv2622 PE=1 SV=1;A0A0H3M7K2_MYCBP Possible methyltransferase (Methylase) OS=Mycobacterium bovis (strain BCG / Pasteur 1173P2) GN=BCG_2649 PE=4 SV=1	intermediary metabolism and respiration	Rv2622	I6XES4	A0A0H3M7K2	29.542	46.2	23.3287	22.3123	25.0215	25.581	24.2295	23.1596	20.6981	22.744	22.8826	23.0937	23.6491	24.8365	9	5	5	9	5	5	4	0	5	6	4	6	7	0	103.22
I6YEH6_MYCTU Enoyl-CoA hydratase OS=Mycobacterium tuberculosis (strain ATCC 25618 / H37Rv) GN=echA16 PE=1 SV=1;A0A0H3M7K7_MYCBP Probable enoyl-CoA hydratase echa16 OS=Mycobacterium bovis (strain BCG / Pasteur 1173P2) GN=echA16 PE=4 SV=1	lipid metabolism	Rv2831	I6YEH6	A0A0H3M7K7	26.63	53.8	21.063	21.3969	21.119	25.4452	20.7913	21.7842	22.0105	24.6441	21.0481	23.6121	22.7929	21.2263	9	5	4	8	5	7	5	2	5	4	5	7	6	0	52.996
A0A0H3M7K8_MYCBP Probable acyl-CoA dehydrogenase fadE5 OS=Mycobacterium bovis (strain BCG / Pasteur 1173P2) GN=fadE5 PE=3 SV=1;O53666_MYCTU Butyryl-CoA dehydrogenase OS=Mycobacterium tuberculosis (strain ATCC 25618 / H37Rv) GN=fadE5 PE=1 SV=1	lipid metabolism	Rv0244c	A0A0H3M7K8	O53666	66.014	64.6	26.9979	27.7743	26.9606	27.1737	24.7685	26.4692	27.0976	27.1441	27.3805	27.1055	26.9552	26.7274	24	16	16	17	16	18	13	12	14	15	11	16	16	0	240.69
Y2632_MYCTU Uncharacterized protein Rv2632c OS=Mycobacterium tuberculosis (strain ATCC 25618 / H37Rv) GN=Rv2632c PE=1 SV=1;A0A0H3M7L0_MYCBP Uncharacterized protein OS=Mycobacterium bovis (strain BCG / Pasteur 1173P2) GN=BCG_2659c PE=4 SV=1	Conserved hypotheticals	Rv2632c	P9WL61	A0A0H3M7L0	10.083	77.4	27.0415	25.9768	27.7129	26.9933	24.5213	28.3964	26.3736	26.7174	27.6578	26.723	25.8239	26.0787	4	4	2	3	1	3	2	2	2	3	1	2	3	0	104.87
O53671_MYCTU Membrane protein OS=Mycobacterium tuberculosis (strain ATCC 25618 / H37Rv) GN=Rv0249c PE=1 SV=1;A0A0H3M7L3_MYCBP Putative succinate dehydrogenase [membrane anchor subunit] OS=Mycobacterium bovis (strain BCG / Pasteur 1173P2) GN=BCG_0287c PE=4	intermediary metabolism and respiration	Rv0249c	O53671	A0A0H3M7L3	31.077	13.6	21.8181	21.8038	21.8136	21.7884	18.0992	19.62	18.1184	20.7238	19.1616	18.8154	19.9492	20.8196	3	2	3	2	2	3	2	2	2	1	2	3	3	0	6.6119
A0A0H3M7L7_MYCBP Probable polyketide synthase pks12 OS=Mycobacterium bovis (strain BCG / Pasteur 1173P2) GN=pks12 PE=4 SV=1;I6XD69_MYCTU Polyketide synthase Pks12 OS=Mycobacterium tuberculosis (strain ATCC 25618 / H37Rv) GN=pks12 PE=1 SV=1	lipid metabolism	Rv2048c	A0A0H3M7L7	I6XD69	431.54	20.1	22.0759	23.9683	24.6282	24.2982	20.296	24.5037	19.1157	22.1472	22.482	20.8255	23.5041	21.9694	30	5	16	15	15	12	16	1	8	3	2	16	9	0	151.59
L7N6B2_MYCTU Iron ABC transporter substrate-binding protein OS=Mycobacterium tuberculosis (strain ATCC 25618 / H37Rv) GN=Rv0265c PE=1 SV=1;A0A0H3M7M5_MYCBP Probable periplasmic iron-transport lipoprotein OS=Mycobacterium bovis (strain BCG / Pasteur 1173P2)	cell wall and cell processes	Rv0265c	L7N6B2	A0A0H3M7M5	35.284	13	23.6432	19.2283	23.0987	22.4386	18.8066	22.8858	19.4991	22.9461	21.9884	19.4553	18.3034	19.0582	3	1	0	1	1	2	1	1	1	1	1	2	0	0	66.367
O86340_MYCTU Conserved protein OS=Mycobacterium tuberculosis (strain ATCC 25618 / H37Rv) GN=Rv2061c PE=1 SV=3;A0A0H3M7M8_MYCBP Uncharacterized protein OS=Mycobacterium bovis (strain BCG / Pasteur 1173P2) GN=BCG_2080c PE=4 SV=1	Conserved hypotheticals	Rv2061c	O86340	A0A0H3M7M8	14.814	66.4	23.908	22.8873	22.4955	23.9478	23.7261	22.7156	23.0102	24.3257	23.8726	24.1466	23.7303	23.207	8	7	2	6	5	4	2	2	2	3	3	5	4	0	21.653
Y2667_MYCTU Uncharacterized protein Rv2667 OS=Mycobacterium tuberculosis (strain ATCC 25618 / H37Rv) GN=Rv2667 PE=3 SV=1;A0A0H3M7M9_MYCBP Possible ATP-dependent protease ATP-binding subunit clpX OS=Mycobacterium bovis (strain BCG / Pasteur 1173P2) GN=clpX	intermediary metabolism and respiration	Rv2667	P9WPC7	A0A0H3M7M9	26.627	22.2	22.5035	20.6455	23.8086	22.496	18.9754	19.3196	19.3224	19.6526	18.9547	19.2807	16.8819	19.6231	4	1	1	1	1	3	2	0	0	1	0	1	0	0	46.821
P95227_MYCTU Acyl-CoA synthetase OS=Mycobacterium tuberculosis (strain ATCC 25618 / H37Rv) GN=fadD2 PE=1 SV=1;A0A0H3M7N1_MYCBP Probable fatty-acid-CoA ligase fadD2 OS=Mycobacterium bovis (strain BCG / Pasteur 1173P2) GN=fadD2 PE=4 SV=1	lipid metabolism	Rv0270	P95227	A0A0H3M7N1	59.892	61.2	23.0457	23.6319	23.5034	24.423	21.3755	24.0218	22.9298	23.9278	23.4569	23.6009	23.623	23.2042	20	8	10	12	11	10	9	5	8	10	6	15	13	0	180.83
Y2859_MYCTU Putative glutamine amidotransferase Rv2859c OS=Mycobacterium tuberculosis (strain ATCC 25618 / H37Rv) GN=Rv2859c PE=1 SV=1;A0A0H3M7N2_MYCBP Possible amidotransferase OS=Mycobacterium bovis (strain BCG / Pasteur 1173P2) GN=BCG_2881c PE=4 SV=1	intermediary metabolism and respiration	Rv2859c	O33341	A0A0H3M7N2	32.441	39.6	21.9628	21.4401	22.3127	22.969	21.0463	22.7279	20.3316	22.5937	18.3594	22.43	21.5176	19.9505	8	6	2	5	5	7	5	2	3	1	2	5	2	0	63.436
P71969_MYCTU Possible secreted protease OS=Mycobacterium tuberculosis (strain ATCC 25618 / H37Rv) GN=Rv2672 PE=1 SV=1;A0A0H3M7N4_MYCBP Possible secreted protease OS=Mycobacterium bovis (strain BCG / Pasteur 1173P2) GN=BCG_2685 PE=4 SV=1	intermediary metabolism and respiration	Rv2672	P71969	A0A0H3M7N4	54.015	47.9	24.8904	24.2792	24.9578	25.3027	24.749	26.3201	23.9653	25.4925	24.7806	25.2324	23.1806	24.4456	13	6	4	6	9	9	8	3	7	4	8	7	4	0	77.638
ECCC3_MYCTU ESX-3 secretion system protein EccC3 OS=Mycobacterium tuberculosis (strain ATCC 25618 / H37Rv) GN=eccC3 PE=1 SV=1;A0A0H3M7P2_MYCBP Possible conserved membrane protein OS=Mycobacterium bovis (strain BCG / Pasteur 1173P2) GN=BCG_0324 PE=4 SV=1	cell wall and cell processes	Rv0284	P9WNA9	A0A0H3M7P2	145.17	22.5	24.7059	23.316	24.1625	23.7034	20.6551	23.095	22.8753	22.2034	22.7336	21.2399	22.6157	23.0051	16	4	8	7	10	7	9	2	5	3	3	8	2	0	124.67
ESPG3_MYCTU ESX-3 secretion-associated protein EspG3 OS=Mycobacterium tuberculosis (strain ATCC 25618 / H37Rv) GN=espG3 PE=1 SV=1;A0A0H3M7P5_MYCBP Uncharacterized protein OS=Mycobacterium bovis (strain BCG / Pasteur 1173P2) GN=BCG_0329 PE=4 SV=1	cell wall and cell processes	Rv0289	P9WJC7	A0A0H3M7P5	31.558	12.2	21.3603	19.0448	20.1941	20.2606	18.6094	20.9764	20.1902	20.1244	18.8125	20.0152	18.8383	19.0427	2	1	0	1	2	0	2	0	1	1	0	0	1	0	3.7937
STF0_MYCTU Trehalose 2-sulfotransferase OS=Mycobacterium tuberculosis (strain ATCC 25618 / H37Rv) GN=stf0 PE=1 SV=1;A0A0H3M7Q0_MYCBP Uncharacterized protein OS=Mycobacterium bovis (strain BCG / Pasteur 1173P2) GN=BCG_0335c PE=4 SV=1	Conserved hypotheticals	Rv0295c	O53699	A0A0H3M7Q0	29.774	33	23.1394	23.0803	22.77	24.1171	18.3845	24.4269	23.1047	22.9138	22.9506	23.508	22.7017	20.8835	5	4	5	4	5	0	4	3	5	4	4	5	4	0	42.116
O07191_MYCTU 23S rRNA methyltransferase OS=Mycobacterium tuberculosis (strain ATCC 25618 / H37Rv) GN=Rv2689c PE=1 SV=3;A0A0H3M7Q7_MYCBP Conserved hypothetical alanine and valine and glycine rich protein OS=Mycobacterium bovis (strain BCG / Pasteur 1173P2)	Conserved hypotheticals	Rv2689c	O07191	A0A0H3M7Q7	43.241	7.4	19.8641	19.2588	19.3527	21.6555	17.7579	21.3324	20.4682	20.025	18.8954	18.9265	20.3376	19.0822	2	2	1	2	2	0	2	0	2	2	1	2	0	0	19.939
O07242_MYCTU 1,3-beta-glucanase OS=Mycobacterium tuberculosis (strain ATCC 25618 / H37Rv) GN=Rv0315 PE=1 SV=1;A0A0H3M7R0_MYCBP Possible beta-1,3-glucanase OS=Mycobacterium bovis (strain BCG / Pasteur 1173P2) GN=BCG_0355 PE=4 SV=1	intermediary metabolism and respiration	Rv0315	O07242	A0A0H3M7R0	32.186	41.2	27.2435	26.8344	26.2846	28.2735	26.3326	28.1897	26.7762	28.1758	26.7667	28.5202	26.9832	25.9899	10	10	8	9	7	8	9	8	8	8	8	9	9	0	158.57
O07196_MYCTU Conserved protein OS=Mycobacterium tuberculosis (strain ATCC 25618 / H37Rv) GN=Rv2694c PE=1 SV=3;A0A0H3M7R3_MYCBP Uncharacterized protein OS=Mycobacterium bovis (strain BCG / Pasteur 1173P2) GN=BCG_2707c PE=4 SV=1	Conserved hypotheticals	Rv2694c	O07196	A0A0H3M7R3	13.57	50.8	16.7821	17.464	16.9705	20.0037	21.7924	19.5401	19.017	18.1001	17.8064	18.0814	19.887	18.2939	7	4	1	5	3	7	3	1	3	1	3	3	2	0	39.022
Y2091_MYCTU Uncharacterized protein Rv2091c OS=Mycobacterium tuberculosis (strain ATCC 25618 / H37Rv) GN=Rv2091c PE=1 SV=1;A0A0H3M7R4_MYCBP Probable membrane protein OS=Mycobacterium bovis (strain BCG / Pasteur 1173P2) GN=BCG_2111c PE=4 SV=1	cell wall and cell processes	Rv2091c	P9WLJ5	A0A0H3M7R4	26.019	15.6	19.5867	18.53	19.4324	18.6003	22.1843	17.5583	19.3395	19.2851	19.4047	19.5219	17.3574	19.9977	4	3	1	3	2	3	3	1	2	1	1	2	2	0	43.153
I6Y1I5_MYCTU Possible conserved secreted alanine rich protein OS=Mycobacterium tuberculosis (strain ATCC 25618 / H37Rv) GN=Rv2700 PE=1 SV=1;A0A0H3M7R6_MYCBP Possible secreted alanine rich protein OS=Mycobacterium bovis (strain BCG / Pasteur 1173P2) GN=BCG_	cell wall and cell processes	Rv2700	I6Y1I5	A0A0H3M7R6	22.659	50.9	17.5626	19.1175	18.523	22.408	22.1899	21.3793	19.2814	22.7629	20.2895	22.1874	21.6541	21.7005	4	0	1	1	2	2	2	1	3	0	4	3	2	0	11.249
O07252_MYCTU Possible transcriptional regulatory protein (Possibly TetR/AcrR-family) OS=Mycobacterium tuberculosis (strain ATCC 25618 / H37Rv) GN=Rv0328 PE=1 SV=1;A0A0H3M7R7_MYCBP Possible transcriptional regulatory protein (Possibly tetR/acrR-family) OS=M	Regulatory proteins	Rv0328	O07252	A0A0H3M7R7	21.411	24.5	18.7726	19.9696	18.773	18.7791	16.532	20.2714	19.187	18.4756	20.0783	18.5273	18.5605	19.2303	4	1	1	1	2	2	2	1	2	1	1	1	1	0	11.745
Y2908_MYCTU UPF0109 protein Rv2908c OS=Mycobacterium tuberculosis (strain ATCC 25618 / H37Rv) GN=Rv2908c PE=1 SV=1;A0A0H3M7R8_MYCBP UPF0109 protein BCG_2929c OS=Mycobacterium bovis (strain BCG / Pasteur 1173P2) GN=BCG_2929c PE=3 SV=1	Conserved hypotheticals	Rv2908c	P9WFM7	A0A0H3M7R8	8.5206	65	22.3402	20.7932	22.5357	20.2759	24.4037	20.8408	21.754	20.6376	21.8607	19.5409	22.7903	21.4628	5	4	2	5	5	5	3	3	3	2	0	5	3	0	90.924
O33273_MYCTU Uncharacterized protein OS=Mycobacterium tuberculosis (strain ATCC 25618 / H37Rv) GN=Rv0333 PE=1 SV=1;A0A0H3M7S1_MYCBP Uncharacterized protein OS=Mycobacterium bovis (strain BCG / Pasteur 1173P2) GN=BCG_0372 PE=4 SV=1	Conserved hypotheticals	Rv0333	O33273	A0A0H3M7S1	13.074	30.6	17.2954	17.4853	19.2266	19.63	21.6087	19.7606	19.4839	18.0168	19.3441	18.5983	20.0996	18.337	3	2	2	2	3	2	3	2	2	2	2	3	3	0	21.245
O07206_MYCTU Uncharacterized protein OS=Mycobacterium tuberculosis (strain ATCC 25618 / H37Rv) GN=Rv2705c PE=1 SV=1;A0A0H3M7S2_MYCBP Uncharacterized protein OS=Mycobacterium bovis (strain BCG / Pasteur 1173P2) GN=BCG_2718c PE=4 SV=1	Conserved hypotheticals	Rv2705c	O07206	A0A0H3M7S2	14.087	49.6	21.0706	19.5999	21.1481	21.1262	21.1544	22.1986	19.7543	21.12	20.4982	21.5214	20.1894	19.1217	4	2	1	3	2	3	2	1	2	2	2	2	1	0	33.601
Y2915_MYCTU Uncharacterized protein Rv2915c OS=Mycobacterium tuberculosis (strain ATCC 25618 / H37Rv) GN=Rv2915c PE=1 SV=1;A0A0H3M7S3_MYCBP Uncharacterized protein OS=Mycobacterium bovis (strain BCG / Pasteur 1173P2) GN=BCG_2936c PE=4 SV=1	Conserved hypotheticals	Rv2915c	P9WL23	A0A0H3M7S3	39.769	30.8	19.9631	18.9294	19.6121	18.5379	21.4399	21.4712	20.3107	18.7884	18.4915	20.1571	22.2017	17.7452	7	2	1	2	0	6	3	0	0	0	0	2	1	0	32.542
SIGB_MYCTU RNA polymerase sigma factor SigB OS=Mycobacterium tuberculosis (strain ATCC 25618 / H37Rv) GN=sigB PE=1 SV=1;A0A0H3M7S6_MYCBP RNA polymerase sigma factor OS=Mycobacterium bovis (strain BCG / Pasteur 1173P2) GN=sigB PE=3 SV=1	information pathways	Rv2710	P9WGI5	A0A0H3M7S6	36.343	25.4	22.3462	21.9603	18.7985	21.0433	17.9934	21.434	22.6711	21.9069	22.2793	22.0248	22.1984	19.2486	5	1	1	2	2	5	2	1	2	1	1	3	1	0	22.827
Y2716_MYCTU Uncharacterized protein Rv2716 OS=Mycobacterium tuberculosis (strain ATCC 25618 / H37Rv) GN=Rv2716 PE=1 SV=1;A0A0H3M7T1_MYCBP Uncharacterized protein OS=Mycobacterium bovis (strain BCG / Pasteur 1173P2) GN=BCG_2729 PE=4 SV=1	Conserved hypotheticals	Rv2716	P9WL43	A0A0H3M7T1	24.574	42.1	23.3112	23.2686	22.8301	23.9283	18.762	24.4222	23.6572	23.9621	23.4283	24.0698	23.2316	22.1418	6	4	4	4	3	5	4	3	3	4	3	4	2	0	45.7
O33249_MYCTU Conserved protein OS=Mycobacterium tuberculosis (strain ATCC 25618 / H37Rv) GN=Rv2114 PE=1 SV=3;A0A0H3M7T2_MYCBP Uncharacterized protein OS=Mycobacterium bovis (strain BCG / Pasteur 1173P2) GN=BCG_2131 PE=4 SV=1	Conserved hypotheticals	Rv2114	O33249	A0A0H3M7T2	22.774	61.4	22.8749	21.4811	21.4846	23.3905	20.8097	24.1531	21.6647	22.6023	21.8794	22.221	22.0855	20.8519	9	4	2	4	6	8	6	1	3	1	2	4	4	0	25.006
Y2926_MYCTU Uncharacterized protein Rv2926c OS=Mycobacterium tuberculosis (strain ATCC 25618 / H37Rv) GN=Rv2926c PE=1 SV=1;A0A0H3M7T4_MYCBP Uncharacterized protein OS=Mycobacterium bovis (strain BCG / Pasteur 1173P2) GN=BCG_2948c PE=4 SV=1	Conserved hypotheticals	Rv2926c	P9WL17	A0A0H3M7T4	22.41	36.7	18.3805	19.6488	18.9939	19.1608	17.4903	20.7358	19.042	18.6797	19.5785	19.0496	19.5114	19.1886	4	1	1	2	2	2	2	1	1	0	1	2	2	0	17.411
O33255_MYCTU Membrane protein OS=Mycobacterium tuberculosis (strain ATCC 25618 / H37Rv) GN=Rv2120c PE=1 SV=1;A0A0H3M7T8_MYCBP Probable conserved integral membrane protein OS=Mycobacterium bovis (strain BCG / Pasteur 1173P2) GN=BCG_2137c PE=4 SV=1	cell wall and cell processes	Rv2120c	O33255	A0A0H3M7T8	16.403	25	23.9008	21.745	25.0798	23.1589	16.987	21.786	18.4488	22.2564	23.8766	20.8952	19.3544	23.5721	2	1	1	2	2	0	1	1	1	1	2	1	2	0	87.351
ALF_MYCTU Fructose-bisphosphate aldolase OS=Mycobacterium tuberculosis (strain ATCC 25618 / H37Rv) GN=fba PE=1 SV=1;A0A0H3M7T9_MYCBP Probable fructose-bisphosphate aldolase fba OS=Mycobacterium bovis (strain BCG / Pasteur 1173P2) GN=fba PE=3 SV=1	intermediary metabolism and respiration	Rv0363c	P9WQA3	A0A0H3M7T9	36.544	79.1	25.9731	25.9995	25.9524	26.9729	25.6269	27.0997	26.5629	26.5921	26.1234	26.7556	26.8991	25.707	20	18	13	18	16	17	19	9	14	15	12	19	18	0	323.31
A0A0H3M7U0_MYCBP Phenolpthiocerol synthesis type-I polyketide synthase ppsA OS=Mycobacterium bovis (strain BCG / Pasteur 1173P2) GN=ppsA PE=4 SV=1	Lipid metabolism		A0A0H3M7U0		198.85	35.2	25.6757	25.9636	26.0103	25.3936	23.1822	25.2258	25.8419	24.772	26.1562	23.5476	25.5335	24.5265	1	0	0	0	1	0	1	0	0	0	0	1	1	0	249.4
I6XF60_MYCTU Conserved alanine and arginine rich protein OS=Mycobacterium tuberculosis (strain ATCC 25618 / H37Rv) GN=Rv2731 PE=1 SV=1;A0A0H3M7U1_MYCBP Conserved hypothetical alanine and arginine rich protein OS=Mycobacterium bovis (strain BCG / Pasteur 11	Conserved hypotheticals	Rv2731	I6XF60	A0A0H3M7U1	49.795	34.2	19.9294	20.9378	19.5454	19.897	23.4758	21.4329	20.6023	20.2375	19.3482	20.2322	22.0495	20.2464	12	2	2	4	3	12	4	2	3	1	2	6	4	0	245.46
A0A0H3M7U5_MYCBP Probable daunorubicin-DIM-transport ATP-binding protein ABC transporter drrA OS=Mycobacterium bovis (strain BCG / Pasteur 1173P2) GN=drrA PE=4 SV=1;DRRA_MYCTU Doxorubicin resistance ATP-binding protein DrrA OS=Mycobacterium tuberculosis (s	cell wall and cell processes	Rv2936	A0A0H3M7U5	P9WQL9	35.796	52.9	26.5601	26.5709	26.3451	25.8205	22.3073	26.8076	26.424	26.2964	26.199	25.7827	25.7414	24.5024	10	6	7	7	7	5	5	7	6	6	5	7	5	0	200.27
Y2140_MYCTU UPF0098 protein Rv2140c OS=Mycobacterium tuberculosis (strain ATCC 25618 / H37Rv) GN=Rv2140c PE=1 SV=1;A0A0H3M7V3_MYCBP Uncharacterized protein OS=Mycobacterium bovis (strain BCG / Pasteur 1173P2) GN=TB18.6 PE=4 SV=1	Conserved hypotheticals	Rv2140c	P9WFN1	A0A0H3M7V3	18.634	97.2	24.8331	24.9899	24.7666	26.2858	25.0972	24.3483	24.6778	27.4941	24.9341	27.5069	23.917	24.4293	9	8	8	8	8	5	9	8	6	8	6	9	9	0	98.758
FAA22_MYCTU p-hydroxybenzoic acid--AMP ligase FadD22 OS=Mycobacterium tuberculosis (strain ATCC 25618 / H37Rv) GN=fadD22 PE=1 SV=1;A0A0H3M7V5_MYCBP Probable fatty-acid-CoA ligase fadD22 OS=Mycobacterium bovis (strain BCG / Pasteur 1173P2) GN=fadD22 PE=4 SV	lipid metabolism	Rv2948c	P9WQ61	A0A0H3M7V5	75.197	51.9	26.4734	26.0637	26.9887	25.803	24.1796	26.2756	25.9421	25.9809	27.2362	24.2211	25.4538	24.6268	20	11	9	9	10	13	11	6	5	6	7	9	10	0	238.51
WAG31_MYCTU Cell wall synthesis protein Wag31 OS=Mycobacterium tuberculosis (strain ATCC 25618 / H37Rv) GN=wag31 PE=1 SV=1;A0A0H3M7V8_MYCBP Uncharacterized protein OS=Mycobacterium bovis (strain BCG / Pasteur 1173P2) GN=wag31 PE=4 SV=1	cell wall and cell processes	Rv2145c	P9WMU1	A0A0H3M7V8	28.277	75.8	26.2869	24.3239	26.0361	25.2909	29.6317	25.5465	25.1722	25.1869	25.2649	25.4148	25.7627	26.072	13	13	11	13	10	13	12	10	9	13	7	13	12	0	323.31
CLPB_MYCTU Chaperone protein ClpB OS=Mycobacterium tuberculosis (strain ATCC 25618 / H37Rv) GN=clpB PE=1 SV=1;A0A0H3M7W9_MYCBP Chaperone protein ClpB OS=Mycobacterium bovis (strain BCG / Pasteur 1173P2) GN=clpB PE=3 SV=1	virulence, detoxification and adaptation	Rv0384c	P9WPD1	A0A0H3M7W9	92.567	66.3	25.4283	25.9623	25.8845	25.5301	26.9213	25.3959	25.4871	25.6637	25.7037	26.1933	24.9432	25.05	38	26	15	25	21	27	25	12	14	12	10	27	18	0	323.31
P95198_MYCTU Conserved protein OS=Mycobacterium tuberculosis (strain ATCC 25618 / H37Rv) GN=Rv0390 PE=1 SV=2;A0A0H3M7X2_MYCBP Uncharacterized protein OS=Mycobacterium bovis (strain BCG / Pasteur 1173P2) GN=BCG_0427 PE=4 SV=1	Conserved hypotheticals	Rv0390	P95198	A0A0H3M7X2	15.392	86.4	21.1276	22.9459	21.2485	23.3531	23.3966	22.8293	22.439	23.0117	21.7935	23.1715	23.9456	21.4234	8	2	4	6	3	6	4	3	4	5	4	7	3	0	68.583
A0A0H3M7X4_MYCBP Probable DNA-binding protein HU homolog hupB OS=Mycobacterium bovis (strain BCG / Pasteur 1173P2) GN=hupB PE=3 SV=1;DBH_MYCTU DNA-binding protein HU homolog OS=Mycobacterium tuberculosis (strain ATCC 25618 / H37Rv) GN=hup PE=1 SV=1	information pathways	Rv2986c	A0A0H3M7X4	P9WMK7	21.292	31.7	21.782	22.6236	22.7391	25.8754	23.5176	23.4153	21.5973	23.2111	22.333	22.1294	23.8324	24.3911	8	5	5	5	4	8	6	4	4	4	3	5	5	0	56.045
P95208_MYCTU Acyl-CoA dehydrogenase OS=Mycobacterium tuberculosis (strain ATCC 25618 / H37Rv) GN=fadE7 PE=1 SV=3;A0A0H3M7X8_MYCBP Probable acyl-CoA dehydrogenase fadE7 OS=Mycobacterium bovis (strain BCG / Pasteur 1173P2) GN=fadE7 PE=3 SV=1	lipid metabolism	Rv0400c	P95208	A0A0H3M7X8	42.297	26.1	19.2645	20.0949	19.5455	20.6848	20.3819	19.9206	19.7232	20.0971	19.987	20.0281	20.5194	19.8839	7	1	3	2	5	5	4	0	5	2	4	5	6	0	24.79
O53518_MYCTU Uncharacterized protein OS=Mycobacterium tuberculosis (strain ATCC 25618 / H37Rv) GN=Rv2184c PE=1 SV=3;A0A0H3M7X9_MYCBP Uncharacterized protein OS=Mycobacterium bovis (strain BCG / Pasteur 1173P2) GN=BCG_2199c PE=4 SV=1	Conserved hypotheticals	Rv2184c	O53518	A0A0H3M7X9	40.856	26.9	23.9764	23.1277	23.3357	23.5406	18.1201	23.8525	19.2578	19.0483	23.3414	23.5811	22.5423	17.6454	5	2	2	3	4	1	4	1	1	3	2	4	1	0	13.378
O53246_MYCTU Peptidase M23B OS=Mycobacterium tuberculosis (strain ATCC 25618 / H37Rv) GN=lppY PE=1 SV=1;A0A0H3M7Y0_MYCBP Probable conserved lipoprotein lppY OS=Mycobacterium bovis (strain BCG / Pasteur 1173P2) GN=lppY PE=4 SV=1	cell wall and cell processes	Rv2999	O53246	A0A0H3M7Y0	33.949	56.4	23.5989	22.2693	22.7203	23.3335	18.1907	22.6752	21.8171	23.3288	22.026	23.1668	22.7552	22.5892	10	6	4	6	6	4	5	2	4	3	3	6	4	0	67.33
FAA30_MYCTU Long-chain-fatty-acid--AMP ligase FadD30 OS=Mycobacterium tuberculosis (strain ATCC 25618 / H37Rv) GN=fadD30 PE=1 SV=1;A0A0H3M7Y1_MYCBP Probable fatty-acid-CoA ligase fadD30 OS=Mycobacterium bovis (strain BCG / Pasteur 1173P2) GN=fadD30 PE=4 SV	lipid metabolism	Rv0404	P9WQ57	A0A0H3M7Y1	63.843	10.8	20.8772	19.5264	21.3406	20.3288	17.2929	19.3633	20.9375	19.3393	19.0982	18.6292	17.972	18.8046	4	2	0	2	2	2	1	0	2	1	1	0	1	0	14.889
I6YAV3_MYCTU Membrane protein OS=Mycobacterium tuberculosis (strain ATCC 25618 / H37Rv) GN=Rv3005c PE=1 SV=1;A0A0H3M7Y3_MYCBP Uncharacterized protein OS=Mycobacterium bovis (strain BCG / Pasteur 1173P2) GN=BCG_3027c PE=4 SV=1	Conserved hypotheticals	Rv3005c	I6YAV3	A0A0H3M7Y3	28.859	23.3	19.3789	19.6621	19.4	20.0849	19.3845	19.6315	18.5387	20.1959	17.5961	19.7892	18.6646	17.6492	5	2	2	2	2	3	2	1	2	1	2	3	1	0	22.003
PTA_MYCTU Phosphate acetyltransferase OS=Mycobacterium tuberculosis (strain ATCC 25618 / H37Rv) GN=pta PE=1 SV=1;A0A0H3M7Y4_MYCBP Phosphate acetyltransferase OS=Mycobacterium bovis (strain BCG / Pasteur 1173P2) GN=pta PE=3 SV=1	intermediary metabolism and respiration	Rv0408	P9WHP1	A0A0H3M7Y4	72.948	17.8	21.6589	22.2551	22.8281	21.582	23.8343	22.0739	18.9437	18.4618	17.8608	19.8214	21.4956	19.2574	8	3	3	4	6	4	5	0	2	1	0	4	2	0	41.129
O53260_MYCTU Conserved protein OS=Mycobacterium tuberculosis (strain ATCC 25618 / H37Rv) GN=Rv3013 PE=1 SV=3;A0A0H3M7Y5_MYCBP Uncharacterized protein OS=Mycobacterium bovis (strain BCG / Pasteur 1173P2) GN=BCG_3035 PE=4 SV=1	Conserved hypotheticals	Rv3013	O53260	A0A0H3M7Y5	22.999	30.3	20.069	18.8151	22.3837	22.6516	22.0958	22.732	20.0648	22.1987	19.615	18.7951	21.6067	22.5241	5	1	1	2	2	3	2	1	2	1	1	4	2	0	21.946
MUTT3_MYCTU Putative 8-oxo-dGTP diphosphatase 3 OS=Mycobacterium tuberculosis (strain ATCC 25618 / H37Rv) GN=mutT3 PE=1 SV=1;A0A0H3M7Y8_MYCBP Possible mutator protein mutT3 (7,8-DIHYDRO-8-OXOGUANINE-TRIPHOSPHATASE) (8-OXO-DGTPASE) (DGTP PYROPHOSPHOHYDROLAS	information pathways	Rv0413	P9WIX9	A0A0H3M7Y8	23.499	18.9	19.7614	18.702	17.1702	19.9738	19.2236	19.9573	20.1811	19.9686	18.8973	18.9495	18.405	18.6341	3	1	1	1	3	1	3	0	3	1	2	2	1	0	13.495
I6Y1P2_MYCTU Conserved protein OS=Mycobacterium tuberculosis (strain ATCC 25618 / H37Rv) GN=Rv2778c PE=1 SV=1;A0A0H3M7Z8_MYCBP Uncharacterized protein OS=Mycobacterium bovis (strain BCG / Pasteur 1173P2) GN=BCG_2795c PE=4 SV=1	Conserved hypotheticals	Rv2778c	I6Y1P2	A0A0H3M7Z8	17.268	37.8	20.2322	20.3438	20.8838	20.6766	21.9611	22.118	20.5394	19.7712	20.9962	20.0725	21.77	20.2792	6	5	2	6	6	6	4	1	3	2	3	6	4	0	31.637
Y2782_MYCTU Uncharacterized zinc protease Rv2782c OS=Mycobacterium tuberculosis (strain ATCC 25618 / H37Rv) GN=Rv2782c PE=1 SV=1;A0A0H3M801_MYCBP Probable zinc protease pepR OS=Mycobacterium bovis (strain BCG / Pasteur 1173P2) GN=pepR PE=3 SV=1	intermediary metabolism and respiration	Rv2782c	P9WHT5	A0A0H3M801	47.072	6.4	19.2222	20.0012	20.8195	21.8321	17.4433	20.8742	19.2588	20.8117	18.4564	20.4701	17.7138	17.5913	2	1	1	2	2	0	2	1	2	1	0	1	0	0	38.842
O53287_MYCTU Conserved protein OS=Mycobacterium tuberculosis (strain ATCC 25618 / H37Rv) GN=Rv3040c PE=1 SV=1;A0A0H3M804_MYCBP Uncharacterized protein OS=Mycobacterium bovis (strain BCG / Pasteur 1173P2) GN=BCG_3064c PE=4 SV=1	Conserved hypotheticals	Rv3040c	O53287	A0A0H3M804	31.485	56.2	24.164	23.041	22.2912	24.1374	21.893	24.6096	23.5963	24.0057	23.2487	23.4136	23.5592	18.765	10	4	4	3	6	6	5	4	3	5	5	6	0	0	78.743
I6YEE1_MYCTU Metallophosphoesterase OS=Mycobacterium tuberculosis (strain ATCC 25618 / H37Rv) GN=Rv2795c PE=1 SV=1;A0A0H3M805_MYCBP Uncharacterized protein OS=Mycobacterium bovis (strain BCG / Pasteur 1173P2) GN=BCG_2813c PE=4 SV=1	Conserved hypotheticals	Rv2795c	I6YEE1	A0A0H3M805	37.6	39.2	22.9073	22.7744	24.2083	23.5081	20.3016	23.3376	22.4547	22.0665	23.4591	22.6003	24.1272	17.5819	9	5	2	4	6	5	5	2	3	3	3	5	1	0	48.835
ADHC_MYCTU NADP-dependent alcohol dehydrogenase C OS=Mycobacterium tuberculosis (strain ATCC 25618 / H37Rv) GN=adhC PE=1 SV=1;A0A0H3M808_MYCBP Probable NADP-dependent alcohol dehydrogenase adhC OS=Mycobacterium bovis (strain BCG / Pasteur 1173P2) GN=adhC P	intermediary metabolism and respiration	Rv3045	P9WQC5	A0A0H3M808	37.075	53.2	23.5157	23.434	23.714	25.407	23.754	24.7152	23.5728	25.4843	23.5028	25.3588	24.5807	24.4264	12	10	6	10	8	11	11	6	6	9	6	11	10	0	101.21
SODC_MYCTU Superoxide dismutase [Cu-Zn] OS=Mycobacterium tuberculosis (strain ATCC 25618 / H37Rv) GN=sodC PE=1 SV=1;A0A0H3M817_MYCBP Superoxide dismutase [Cu-Zn] OS=Mycobacterium bovis (strain BCG / Pasteur 1173P2) GN=sodC PE=3 SV=1	virulence, detoxification and adaptation	Rv0432	P9WGE9	A0A0H3M817	23.844	59.2	23.883	22.8434	23.3079	23.1036	23.6813	24.1279	24.4907	23.5723	23.1636	24.0424	23.074	23.2569	6	4	5	5	4	3	6	2	3	3	3	6	5	0	148.21
Y2204_MYCTU Protein Rv2204c OS=Mycobacterium tuberculosis (strain ATCC 25618 / H37Rv) GN=Rv2204c PE=1 SV=1;A0A0H3M819_MYCBP Uncharacterized protein OS=Mycobacterium bovis (strain BCG / Pasteur 1173P2) GN=BCG_2220c PE=3 SV=1	Conserved hypotheticals	Rv2204c	P9WMN5	A0A0H3M819	12.544	62.7	24.2641	23.4087	24.3433	22.5013	25.6138	23.384	24.7543	22.6738	23.8709	22.8661	24.9108	24.4357	6	5	4	5	4	6	4	6	6	5	5	5	5	0	135.17
O53726_MYCTU Probable dehydrogenase/reductase OS=Mycobacterium tuberculosis (strain ATCC 25618 / H37Rv) GN=Rv0439c PE=1 SV=3;A0A0H3M824_MYCBP Putative dehydrogenase/reductase OS=Mycobacterium bovis (strain BCG / Pasteur 1173P2) GN=BCG_0478c PE=4 SV=1	intermediary metabolism and respiration	Rv0439c	O53726	A0A0H3M824	33.65	55	23.4769	23.7957	24.4088	24.0247	22.5572	24.0316	18.6158	22.8874	23.4917	23.2396	22.8853	23.1167	8	2	4	6	4	4	5	1	2	4	1	4	5	0	67.897
I6X658_MYCTU DeoR faimly transcriptional regulator OS=Mycobacterium tuberculosis (strain ATCC 25618 / H37Rv) GN=Rv3066 PE=1 SV=1;A0A0H3M826_MYCBP Probable transcriptional regulatory protein (Probably deoR-family) OS=Mycobacterium bovis (strain BCG / Pasteu	Regulatory proteins	Rv3066	I6X658	A0A0H3M826	21.957	34.7	19.2084	19.6719	23.0665	20.8187	18.0784	22.4246	19.994	18.976	18.0495	19.6546	17.6652	19.0141	3	1	1	2	2	1	2	1	1	1	1	2	1	0	17.29
Y2219_MYCTU Uncharacterized protein Rv2219 OS=Mycobacterium tuberculosis (strain ATCC 25618 / H37Rv) GN=Rv2219 PE=1 SV=1;A0A0H3M828_MYCBP Probable conserved transmembrane protein OS=Mycobacterium bovis (strain BCG / Pasteur 1173P2) GN=BCG_2235 PE=4 SV=1	cell wall and cell processes	Rv2219	P9WLI1	A0A0H3M828	26.863	22.8	17.1562	18.6516	17.2566	17.9579	20.1858	16.4676	19.241	19.4819	19.2716	19.5466	17.8976	20.7319	5	0	0	3	3	4	3	0	2	0	1	2	1	0	15.738
P95087_MYCTU Uncharacterized protein OS=Mycobacterium tuberculosis (strain ATCC 25618 / H37Rv) GN=Rv3071 PE=1 SV=3;A0A0H3M831_MYCBP Uncharacterized protein OS=Mycobacterium bovis (strain BCG / Pasteur 1173P2) GN=BCG_3096 PE=4 SV=1	Conserved hypotheticals	Rv3071	P95087	A0A0H3M831	40.466	16.5	20.4967	19.0658	21.0094	21.6285	18.8479	21.2834	20.0302	19.7437	20.1103	20.9128	18.6886	19.612	3	2	0	3	3	0	2	0	1	1	2	0	0	0	11.027
I6YAE2_MYCTU Probable conserved transmembrane alanine rich protein OS=Mycobacterium tuberculosis (strain ATCC 25618 / H37Rv) GN=Rv2843 PE=1 SV=1;A0A0H3M847_MYCBP Probable conserved transmembrane alanine rich protein OS=Mycobacterium bovis (strain BCG / Pas	cell wall and cell processes	Rv2843	I6YAE2	A0A0H3M847	17.767	26	18.492	19.1756	20.7458	20.8335	17.4754	17.4829	20.3707	21.192	19.2099	21.1776	18.9486	18.8746	3	1	0	2	2	2	1	0	2	1	2	1	1	0	16.915
Y2239_MYCTU Uncharacterized protein Rv2239c OS=Mycobacterium tuberculosis (strain ATCC 25618 / H37Rv) GN=Rv2239c PE=1 SV=1;A0A0H3M849_MYCBP Uncharacterized protein OS=Mycobacterium bovis (strain BCG / Pasteur 1173P2) GN=BCG_2256c PE=4 SV=1	Conserved hypotheticals	Rv2239c	P9WLG9	A0A0H3M849	16.963	52.5	19.026	19.0462	23.3167	19.1794	23.7479	24.3768	24.4522	19.503	18.2264	19.7545	24.6936	23.6409	3	1	1	2	1	2	3	2	1	1	1	3	2	0	32.216
O53751_MYCTU Acyl-ACP thioesterase OS=Mycobacterium tuberculosis (strain ATCC 25618 / H37Rv) GN=Rv0466 PE=1 SV=1;A0A0H3M851_MYCBP Uncharacterized protein OS=Mycobacterium bovis (strain BCG / Pasteur 1173P2) GN=BCG_0506 PE=4 SV=1	Conserved hypotheticals	Rv0466	O53751	A0A0H3M851	30.185	69.3	24.4552	25.04	25.174	23.8964	24.4718	25.0706	24.5928	24.1819	24.815	24.3897	25.1086	23.5399	13	7	6	9	8	9	9	5	5	5	3	10	9	0	159.86
I6YB49_MYCTU Conserved protein OS=Mycobacterium tuberculosis (strain ATCC 25618 / H37Rv) GN=Rv3091 PE=1 SV=1;A0A0H3M854_MYCBP Uncharacterized protein OS=Mycobacterium bovis (strain BCG / Pasteur 1173P2) GN=BCG_3116 PE=4 SV=1	Conserved hypotheticals	Rv3091	I6YB49	A0A0H3M854	61.645	17.9	22.3336	21.3735	23.5367	21.9069	21.4226	21.6342	19.7037	21.676	22.8947	18.6659	23.267	20.5823	7	3	2	3	4	3	5	1	2	2	0	3	3	0	35.958
ACPM_MYCTU Meromycolate extension acyl carrier protein OS=Mycobacterium tuberculosis (strain ATCC 25618 / H37Rv) GN=acpM PE=1 SV=1;A0A0H3M855_MYCBP Acyl carrier protein OS=Mycobacterium bovis (strain BCG / Pasteur 1173P2) GN=acpM PE=3 SV=1	lipid metabolism	Rv2244	P9WQF3	A0A0H3M855	12.524	90.4	27.5029	27.2747	28.1138	27.2235	31.3415	27.0197	27.9149	27.7065	27.1258	26.96	27.1392	28.1162	7	6	6	7	7	7	7	7	5	7	6	6	7	0	287.06
MTR_MYCTU Mycothione reductase OS=Mycobacterium tuberculosis (strain ATCC 25618 / H37Rv) GN=mtr PE=1 SV=1;A0A0H3M857_MYCBP Probable mycothiol reductase mtr OS=Mycobacterium bovis (strain BCG / Pasteur 1173P2) GN=mtr PE=3 SV=1	intermediary metabolism and respiration	Rv2855	P9WHH3	A0A0H3M857	49.945	4.6	23.5735	18.1576	24.5562	24.3112	18.8589	22.705	20.3102	20.6502	24.17	18.3885	18.171	18.7301	1	1	1	1	1	0	1	1	1	1	1	1	1	0	62.952
O33340_MYCTU Aldehyde dehydrogenase OS=Mycobacterium tuberculosis (strain ATCC 25618 / H37Rv) GN=aldC PE=1 SV=1;A0A0H3M862_MYCBP Probable aldehyde dehydrogenase aldC OS=Mycobacterium bovis (strain BCG / Pasteur 1173P2) GN=aldC PE=3 SV=1	intermediary metabolism and respiration	Rv2858c	O33340	A0A0H3M862	48.258	50.8	21.9116	21.2268	21.0605	22.9961	21.4363	22.915	19.6205	22.7441	21.083	22.1457	22.195	21.8178	16	4	3	3	4	14	2	1	3	3	3	6	5	0	45.852
O53532_MYCTU Methyltransferase OS=Mycobacterium tuberculosis (strain ATCC 25618 / H37Rv) GN=Rv2258c PE=1 SV=1;A0A0H3M867_MYCBP Possible transcriptional regulatory protein OS=Mycobacterium bovis (strain BCG / Pasteur 1173P2) GN=BCG_2276c PE=4 SV=1	Regulatory proteins	Rv2258c	O53532	A0A0H3M867	37.513	45.6	22.438	23.5762	23.4227	23.3329	21.7537	23.4699	23.1831	23.6571	22.6964	23.6975	23.4897	22.9529	10	6	4	8	4	8	4	3	4	5	4	8	5	0	47.012
Y2913_MYCTU Uncharacterized protein Rv2913c OS=Mycobacterium tuberculosis (strain ATCC 25618 / H37Rv) GN=Rv2913c PE=1 SV=1;A0A0H3M896_MYCBP Possible D-amino acid aminohydrolase OS=Mycobacterium bovis (strain BCG / Pasteur 1173P2) GN=BCG_2934c PE=4 SV=1	intermediary metabolism and respiration	Rv2913c	P9WJH9	A0A0H3M896	67.204	14.2	18.0449	18.9144	23.1743	23.5588	18.4778	17.8155	19.47	19.0265	19.4191	19.7737	17.5734	16.8688	5	1	2	4	3	1	2	2	1	0	0	1	1	0	16.689
GLNB_MYCTU Nitrogen regulatory protein P-II OS=Mycobacterium tuberculosis (strain ATCC 25618 / H37Rv) GN=glnB PE=1 SV=1;A0A0H3M898_MYCBP Probable nitrogen regulatory protein P-II glnB OS=Mycobacterium bovis (strain BCG / Pasteur 1173P2) GN=glnB PE=3 SV=1	Regulatory proteins	Rv2919c	P9WN31	A0A0H3M898	12.227	68.8	18.9667	21.0867	19.2782	22.5575	22.0809	22.1422	19.6785	23.1198	20.5081	23.52	21.7362	19.8765	6	3	3	4	1	6	4	2	2	2	2	5	3	0	40.894
P95185_MYCTU NADPH:quinone oxidoreductase OS=Mycobacterium tuberculosis (strain ATCC 25618 / H37Rv) GN=fadB4 PE=1 SV=1;A0A0H3M899_MYCBP Probable NADPH quinone oxidoreductase fadB4 OS=Mycobacterium bovis (strain BCG / Pasteur 1173P2) GN=fadB4 PE=4 SV=1	lipid metabolism	Rv3141	P95185	A0A0H3M899	33.852	35.3	23.2078	24.4544	23.9134	23.5707	20.8004	22.6865	23.6512	23.4207	23.9047	23.2697	24.2874	23.2294	5	4	5	4	4	2	4	3	3	3	4	5	5	0	57.308
DHMA1_MYCTU Haloalkane dehalogenase 1 OS=Mycobacterium tuberculosis (strain ATCC 25618 / H37Rv) GN=dhmA1 PE=1 SV=1;A0A0H3M8A0_MYCBP Haloalkane dehalogenase OS=Mycobacterium bovis (strain BCG / Pasteur 1173P2) GN=dhmA PE=3 SV=1	intermediary metabolism and respiration	Rv2296	P9WMS3	A0A0H3M8A0	33.357	58.3	24.0068	24.0164	23.6865	24.083	23.9301	24.5478	23.6327	24.1069	24.5095	24.8583	24.3911	23.4202	15	10	7	12	13	10	10	7	11	9	10	12	10	0	129.88
RNC_MYCTU Ribonuclease 3 OS=Mycobacterium tuberculosis (strain ATCC 25618 / H37Rv) GN=rnc PE=1 SV=1;A0A0H3M8A2_MYCBP Ribonuclease 3 OS=Mycobacterium bovis (strain BCG / Pasteur 1173P2) GN=rnc PE=3 SV=1	information pathways	Rv2925c	P9WH03	A0A0H3M8A2	25.399	60	26.6539	25.6881	26.6374	26.0407	24.2031	27.1933	26.348	25.8432	26.5745	25.5265	24.8754	24.0192	9	4	4	5	5	8	5	4	4	5	4	7	6	0	139.4
Y2302_MYCTU Uncharacterized protein Rv2302 OS=Mycobacterium tuberculosis (strain ATCC 25618 / H37Rv) GN=Rv2302 PE=1 SV=1;A0A0H3M8A3_MYCBP Uncharacterized protein OS=Mycobacterium bovis (strain BCG / Pasteur 1173P2) GN=BCG_2318 PE=4 SV=1	Conserved hypotheticals	Rv2302	P9WLD5	A0A0H3M8A3	8.5904	73.8	19.9294	18.5908	19.904	16.603	23.4826	18.6838	18.7184	18.7816	18.9496	18.914	19.2321	19.1086	4	2	1	3	3	3	3	1	0	2	0	4	3	0	34.92
NUOE_MYCTU NADH-quinone oxidoreductase subunit E OS=Mycobacterium tuberculosis (strain ATCC 25618 / H37Rv) GN=nuoE PE=1 SV=1;A0A0H3M8A5_MYCBP Probable NADH dehydrogenase I (Chain E) nuoE OS=Mycobacterium bovis (strain BCG / Pasteur 1173P2) GN=nuoE PE=4 SV=	intermediary metabolism and respiration	Rv3149	P9WIV5	A0A0H3M8A5	27.197	67.1	27.2348	26.3901	27.2564	26.6491	24.8085	27.9238	26.9238	27.3782	27.3801	26.2513	25.6957	25.5057	10	4	2	6	5	8	5	3	2	4	2	6	4	0	77.796
A0A0H3M8A6_MYCBP Fatty-acid-CoA ligase fadD26 OS=Mycobacterium bovis (strain BCG / Pasteur 1173P2) GN=fadD26 PE=4 SV=1;FAA26_MYCTU Long-chain-fatty-acid--AMP ligase FadD26 OS=Mycobacterium tuberculosis (strain ATCC 25618 / H37Rv) GN=fadD26 PE=1 SV=1	lipid metabolism	Rv2930	A0A0H3M8A6	P9WQ43	63.011	56.4	24.7182	26.0846	24.6424	26.3685	21.7112	24.8165	23.8264	26.4965	24.591	24.7867	24.0367	24.656	20	11	11	11	9	8	7	6	8	5	6	14	15	0	228.95
A0A0H3M8B0_MYCBP Phenolpthiocerol synthesis type-I polyketide synthase ppsE OS=Mycobacterium bovis (strain BCG / Pasteur 1173P2) GN=ppsE PE=4 SV=1;PPSE_MYCTU Phthiocerol synthesis polyketide synthase type I PpsE OS=Mycobacterium tuberculosis (strain ATCC 2	lipid metabolism	Rv2935	A0A0H3M8B0	P9WQE1	158.74	40.3	26.7365	26.8289	26.7493	27.3048	23.1391	26.8495	25.6524	26.6205	26.0734	25.7301	25.6796	25.8751	36	18	20	22	27	18	23	11	18	20	14	26	26	0	323.31
CMAS2_MYCTU Cyclopropane mycolic acid synthase 2 OS=Mycobacterium tuberculosis (strain ATCC 25618 / H37Rv) GN=cmaA2 PE=1 SV=1;A0A0H3M8B1_MYCBP Cyclopropane-fatty-acyl-phospholipid synthase 2 cmaA2 OS=Mycobacterium bovis (strain BCG / Pasteur 1173P2) GN=cma	lipid metabolism	Rv0503c	P9WPB5	A0A0H3M8B1	34.66	71.2	24.7567	25.0376	24.6884	25.2576	24.2452	26.1097	24.6784	25.3039	24.5092	25.2873	26.1946	23.996	15	12	8	12	9	13	11	7	5	10	2	11	9	0	199.86
FAA28_MYCTU Long-chain-fatty-acid--AMP ligase FadD28 OS=Mycobacterium tuberculosis (strain ATCC 25618 / H37Rv) GN=fadD28 PE=1 SV=1;A0A0H3M8B5_MYCBP Fatty-acid-CoA ligase fadD28 OS=Mycobacterium bovis (strain BCG / Pasteur 1173P2) GN=fadD28 PE=4 SV=1	lipid metabolism	Rv1529	P9WQ59	A0A0H3M8B5	62.64	57.1	25.5161	26.3655	25.0861	26.3929	23.1382	26.2203	24.6712	25.7741	25.6391	26.25	25.0408	26.7727	14	5	3	8	8	6	7	1	4	4	4	7	9	0	247.79
A0A0H3M8B9_MYCBP Possible dioxygenase OS=Mycobacterium bovis (strain BCG / Pasteur 1173P2) GN=BCG_3185c PE=4 SV=1;O53311_MYCTU Diguanylate cyclase OS=Mycobacterium tuberculosis (strain ATCC 25618 / H37Rv) GN=Rv3161c PE=1 SV=1	intermediary metabolism and respiration	Rv3161c	A0A0H3M8B9	O53311	42.518	45.8	23.868	22.972	23.6146	23.3511	21.5672	22.5904	24.6369	26.9529	27.2562	27.3146	26.6847	27.4226	12	2	2	3	6	2	3	5	6	9	7	11	10	0	94.133
O33361_MYCTU Possible anti-anti-sigma factor OS=Mycobacterium tuberculosis (strain ATCC 25618 / H37Rv) GN=Rv0516c PE=1 SV=3;A0A0H3M8C0_MYCBP Uncharacterized protein OS=Mycobacterium bovis (strain BCG / Pasteur 1173P2) GN=BCG_0559c PE=4 SV=1	information pathways	Rv0516c	O33361	A0A0H3M8C0	16.987	21.5	23.0544	20.1294	22.6063	21.2025	19.0634	21.4267	20.4539	19.8562	19.5452	19.9624	17.7842	19.1401	2	2	2	2	2	1	2	1	2	1	2	2	1	0	16.094
A0A0H3M8C2_MYCBP Probable polyketide synthase pks1 OS=Mycobacterium bovis (strain BCG / Pasteur 1173P2) GN=pks1 PE=4 SV=1;PKS1_MYCTU Putative inactive phenolphthiocerol synthesis polyketide synthase type I Pks1 OS=Mycobacterium tuberculosis (strain ATCC 25	lipid metabolism	Rv2947c	A0A0H3M8C2	P96285	218.3	34.8	26.7787	26.3443	27.0835	26.9427	24.1245	26.5362	24.3361	26.5321	25.9516	25.528	25.8833	25.6991	39	16	16	22	25	22	17	8	16	14	12	17	18	0	265.85
P95137_MYCTU Conserved protein OS=Mycobacterium tuberculosis (strain ATCC 25618 / H37Rv) GN=Rv2955c PE=1 SV=4;A0A0H3M8C8_MYCBP Uncharacterized protein OS=Mycobacterium bovis (strain BCG / Pasteur 1173P2) GN=BCG_2976c PE=4 SV=1	Conserved hypotheticals	Rv2955c	P95137	A0A0H3M8C8	35.95	27.7	22.8493	22.63	22.7082	22.6566	17.3631	22.6378	22.4445	22.2573	22.5449	20.0585	21.6017	17.6358	7	3	2	2	3	4	3	3	2	4	1	2	2	0	35.316
P71885_MYCTU Conserved protein OS=Mycobacterium tuberculosis (strain ATCC 25618 / H37Rv) GN=Rv2327 PE=1 SV=1;A0A0H3M8D4_MYCBP Uncharacterized protein OS=Mycobacterium bovis (strain BCG / Pasteur 1173P2) GN=BCG_2348 PE=4 SV=1	Conserved hypotheticals	Rv2327	P71885	A0A0H3M8D4	17.208	53.4	18.6375	23.4903	17.6561	18.9212	23.0927	22.3134	24.3615	21.7852	22.7833	19.6126	23.6586	22.5346	6	1	1	1	1	6	1	1	1	2	1	3	3	0	48.68
O06404_MYCTU Possible conserved membrane protein OS=Mycobacterium tuberculosis (strain ATCC 25618 / H37Rv) GN=Rv0538 PE=1 SV=1;A0A0H3M8D6_MYCBP Possible conserved membrane protein OS=Mycobacterium bovis (strain BCG / Pasteur 1173P2) GN=BCG_0582 PE=4 SV=1	cell wall and cell processes	Rv0538	O06404	A0A0H3M8D6	55.075	7.7	18.8677	19.8789	19.7281	18.9934	20.3918	18.6964	18.819	19.8892	20.2698	18.2337	20.6677	19.7669	3	2	1	2	0	3	2	1	0	1	0	2	2	0	19.424
O06409_MYCTU Conserved protein OS=Mycobacterium tuberculosis (strain ATCC 25618 / H37Rv) GN=Rv0543c PE=1 SV=1;A0A0H3M8D7_MYCBP Uncharacterized protein OS=Mycobacterium bovis (strain BCG / Pasteur 1173P2) GN=BCG_0587c PE=4 SV=1	Conserved hypotheticals	Rv0543c	O06409	A0A0H3M8D7	11.312	79	25.6166	26.6033	26.228	25.4782	26.247	26.5646	27.7582	25.336	27.1629	25.8252	25.9217	25.2475	5	5	3	5	2	3	5	3	3	4	3	5	4	0	77.237
MENB_MYCTU 1,4-dihydroxy-2-naphthoyl-CoA synthase OS=Mycobacterium tuberculosis (strain ATCC 25618 / H37Rv) GN=menB PE=1 SV=1;A0A0H3M8D9_MYCBP 1,4-dihydroxy-2-naphthoyl-CoA synthase OS=Mycobacterium bovis (strain BCG / Pasteur 1173P2) GN=menB PE=3 SV=1	intermediary metabolism and respiration	Rv0548c	P9WNP5	A0A0H3M8D9	34.689	22.9	21.4609	24.0525	22.2654	22.1574	20.0591	23.4235	24.3115	22.4083	24.3249	23.03	23.5959	22.1436	5	2	2	3	3	4	3	1	2	2	2	4	2	0	75.019
BPOC_MYCTU Putative non-heme bromoperoxidase BpoC OS=Mycobacterium tuberculosis (strain ATCC 25618 / H37Rv) GN=bpoC PE=1 SV=1;A0A0H3M8E0_MYCBP Possible peroxidase bpoC (Non-haem peroxidase) OS=Mycobacterium bovis (strain BCG / Pasteur 1173P2) GN=bpoC PE=4	virulence, detoxification and adaptation	Rv0554	P9WNH1	A0A0H3M8E0	28.381	50.4	23.3632	24.4061	23.8946	23.9007	19.2223	24.8179	24.792	23.5825	24.3264	24.1475	23.7909	23.1831	8	4	3	4	4	6	3	3	4	3	3	5	3	0	62.292
O53334_MYCTU Uncharacterized protein OS=Mycobacterium tuberculosis (strain ATCC 25618 / H37Rv) GN=Rv3188 PE=1 SV=1;A0A0H3M8E1_MYCBP Uncharacterized protein OS=Mycobacterium bovis (strain BCG / Pasteur 1173P2) GN=BCG_3210 PE=4 SV=1	Conserved hypotheticals	Rv3188	O53334	A0A0H3M8E1	12.817	30.4	19.4533	19.7506	18.0563	18.1562	19.2982	18.1878	19.5377	19.5402	18.7126	19.331	21.9887	19.9023	3	1	1	1	1	3	1	1	1	1	1	2	2	0	30.145
O06428_MYCTU Geranylgeranyl pyrophosphate synthase OS=Mycobacterium tuberculosis (strain ATCC 25618 / H37Rv) GN=grcC1 PE=1 SV=1;A0A0H3M8E2_MYCBP Probable polyprenyl-diphosphate synthase grcC1 OS=Mycobacterium bovis (strain BCG / Pasteur 1173P2) GN=grcC1 PE	intermediary metabolism and respiration	Rv0562	O06428	A0A0H3M8E2	35.56	56.4	23.3774	23.8103	23.2621	23.9454	22.4039	24.5942	23.7978	23.8514	24.7847	24.0333	25.0009	24.08	12	3	5	5	6	10	6	5	3	2	3	7	8	0	98.353
Y0569_MYCTU Uncharacterized protein Rv0569 OS=Mycobacterium tuberculosis (strain ATCC 25618 / H37Rv) GN=Rv0569 PE=1 SV=1;A0A0H3M8E5_MYCBP Uncharacterized protein OS=Mycobacterium bovis (strain BCG / Pasteur 1173P2) GN=BCG_0614 PE=4 SV=1	Conserved hypotheticals	Rv0569	P9WM83	A0A0H3M8E5	9.5226	76.1	17.1292	22.2272	15.8577	22.438	18.5554	21.6304	18.2175	23.8145	17.6261	24.1201	20.4932	20.718	5	4	4	3	3	5	3	1	4	1	2	4	4	0	23.084
P95125_MYCTU Lipase OS=Mycobacterium tuberculosis (strain ATCC 25618 / H37Rv) GN=lipN PE=1 SV=1;A0A0H3M8E8_MYCBP Probable lipase/esterase lipN OS=Mycobacterium bovis (strain BCG / Pasteur 1173P2) GN=lipN PE=4 SV=1	intermediary metabolism and respiration	Rv2970c	P95125	A0A0H3M8E8	40.134	70.7	27.0779	26.2521	26.1281	27.0504	23.6068	27.0714	26.5276	26.9798	26.6923	26.7113	26.4768	24.8234	15	11	9	13	10	8	10	8	7	10	7	14	9	0	213.45
MOEZ_MYCTU Probable adenylyltransferase/sulfurtransferase MoeZ OS=Mycobacterium tuberculosis (strain ATCC 25618 / H37Rv) GN=moeZ PE=1 SV=1;A0A0H3M8F6_MYCBP Probable molybdenum cofactor biosynthesis protein moeB1 OS=Mycobacterium bovis (strain BCG / Pasteur	intermediary metabolism and respiration	Rv3206c	P9WMN7	A0A0H3M8F6	42.173	22.7	20.9324	21.2218	21.2292	22.1046	19.8111	20.5657	20.5944	20.8871	19.0679	20.0681	22.0368	20.4658	6	1	3	2	2	3	2	0	1	1	1	4	4	0	35.934
O05856_MYCTU Conserved protein OS=Mycobacterium tuberculosis (strain ATCC 25618 / H37Rv) GN=Rv3210c PE=1 SV=1;A0A0H3M8G1_MYCBP Uncharacterized protein OS=Mycobacterium bovis (strain BCG / Pasteur 1173P2) GN=BCG_3237c PE=4 SV=1	Conserved hypotheticals	Rv3210c	O05856	A0A0H3M8G1	25.121	34.2	25.4144	24.1486	24.0483	24.6925	17.3348	22.8696	23.8737	23.0642	24.5779	24.1759	22.6484	22.4104	5	3	2	5	3	1	3	2	3	2	3	5	3	0	43.457
MUTT1_MYCTU Probable 8-oxo-dGTP diphosphatase 1 OS=Mycobacterium tuberculosis (strain ATCC 25618 / H37Rv) GN=mutT1 PE=1 SV=1;A0A0H3M8G2_MYCBP Possible hydrolase mutT1 OS=Mycobacterium bovis (strain BCG / Pasteur 1173P2) GN=mutT1 PE=3 SV=1	information pathways	Rv2985	P9WIY3	A0A0H3M8G2	34.78	16.4	18.8757	19.3958	19.0461	19.3526	18.453	18.5386	19.3027	18.2933	18.6652	21.1044	17.5609	19.3116	3	1	0	1	2	2	2	0	1	1	0	1	1	0	5.0743
VPB27_MYCTU Antitoxin VapB27 OS=Mycobacterium tuberculosis (strain ATCC 25618 / H37Rv) GN=vapB27 PE=1 SV=3;A0A0H3M8G3_MYCBP Uncharacterized protein OS=Mycobacterium bovis (strain BCG / Pasteur 1173P2) GN=BCG_0645c PE=4 SV=1	virulence, detoxification and adaptation	Rv0599c	O07779	A0A0H3M8G3	8.2123	52.6	20.9937	22.3274	19.9412	22.6246	18.9763	23.5741	22.0441	22.8273	21.2807	22.758	22.2693	19.1795	2	1	1	1	1	1	1	1	1	1	1	2	2	0	8.3343
A0A0H3M8G4_MYCBP Putative ESAT-6 like protein 6 OS=Mycobacterium bovis (strain BCG / Pasteur 1173P2) GN=esxO PE=4 SV=1	Cell wall and cell processes		A0A0H3M8G4		6.2618	65	18.3993	19.982	18.9013	20.6212	19.7058	23.5514	24.5389	18.0947	22.3371	21.3713	21.0634	19.315	1	0	0	0	1	1	1	1	1	1	1	1	0	0	8.0981
O05876_MYCTU Conserved protein OS=Mycobacterium tuberculosis (strain ATCC 25618 / H37Rv) GN=Rv3231c PE=1 SV=1;A0A0H3M8G6_MYCBP Uncharacterized protein OS=Mycobacterium bovis (strain BCG / Pasteur 1173P2) GN=BCG_3261c PE=4 SV=1	Conserved hypotheticals	Rv3231c	O05876	A0A0H3M8G6	17.797	53.8	22.4131	22.5858	22.4117	21.9854	22.5957	23.5211	22.6644	22.7147	22.0408	23.3998	22.6126	23.53	5	4	2	3	2	5	4	2	2	4	2	4	2	0	20.824
I6X9E2_MYCTU Peptidase M23B OS=Mycobacterium tuberculosis (strain ATCC 25618 / H37Rv) GN=lpqO PE=1 SV=1;A0A0H3M8G7_MYCBP Probable conserved lipoprotein lpqO OS=Mycobacterium bovis (strain BCG / Pasteur 1173P2) GN=lpqO PE=4 SV=1	cell wall and cell processes	Rv0604	I6X9E2	A0A0H3M8G7	32.887	22.2	24.2642	22.5583	24.2847	24.809	17.7745	24.0925	22.8094	24.7441	23.2996	23.8978	22.6947	23.1405	4	3	3	3	2	2	3	3	2	2	2	3	2	0	26.626
I6Y276_MYCTU Possible 2-hydroxyhepta-2,4-diene-1,7-dioate isomerase (HHDD isomerase) OS=Mycobacterium tuberculosis (strain ATCC 25618 / H37Rv) GN=Rv2993c PE=1 SV=2;A0A0H3M8G8_MYCBP Possible 2-hydroxyhepta-2,4-diene-1,7-dioate isomerase OS=Mycobacterium bov	intermediary metabolism and respiration	Rv2993c	I6Y276	A0A0H3M8G8	25.341	61.5	23.5249	24.9849	25.1558	24.6522	26.5863	26.1212	25.4421	23.6303	25.1737	24.9907	25.5238	25.0702	8	5	6	6	5	5	6	4	4	5	4	6	6	0	102.42
I6Y897_MYCTU Tetratricopeptide repeat family protein OS=Mycobacterium tuberculosis (strain ATCC 25618 / H37Rv) GN=Rv0613c PE=1 SV=1;A0A0H3M8H6_MYCBP Uncharacterized protein OS=Mycobacterium bovis (strain BCG / Pasteur 1173P2) GN=BCG_0660c PE=4 SV=1	Conserved hypotheticals	Rv0613c	I6Y897	A0A0H3M8H6	92.752	31	24.8701	23.9728	24.3024	22.9772	22.2223	23.7334	24.3415	24.3873	23.4598	22.2286	24.052	23.316	18	4	4	11	5	14	5	4	2	3	4	7	9	0	100.11
O05888_MYCTU Uncharacterized protein OS=Mycobacterium tuberculosis (strain ATCC 25618 / H37Rv) GN=Rv3243c PE=1 SV=3;A0A0H3M8H7_MYCBP Uncharacterized protein OS=Mycobacterium bovis (strain BCG / Pasteur 1173P2) GN=BCG_3272c PE=4 SV=1	Conserved hypotheticals	Rv3243c	O05888	A0A0H3M8H7	30.689	14.6	19.5773	19.959	22.119	21.3255	17.0333	20.9854	19.2949	21.6987	18.7651	21.8377	18.3418	19.673	3	1	1	2	2	0	2	1	2	2	2	2	1	0	12.502
DNAJ2_MYCTU Chaperone protein DnaJ 2 OS=Mycobacterium tuberculosis (strain ATCC 25618 / H37Rv) GN=dnaJ2 PE=1 SV=1;A0A0H3M8I0_MYCBP Chaperone protein DnaJ OS=Mycobacterium bovis (strain BCG / Pasteur 1173P2) GN=dnaJ2 PE=3 SV=1	virulence, detoxification and adaptation	Rv2373c	P9WNV7	A0A0H3M8I0	40.488	50.8	20.8162	20.7261	19.9005	21.9445	22.1547	21.2729	20.8998	21.5302	19.9565	21.2833	21.7832	21.9216	14	8	6	11	7	11	8	3	5	5	4	10	4	0	95.779
I6YFL7_MYCTU Rubredoxin OS=Mycobacterium tuberculosis (strain ATCC 25618 / H37Rv) GN=rubB PE=1 SV=1;A0A0H3M8I2_MYCBP Rubredoxin OS=Mycobacterium bovis (strain BCG / Pasteur 1173P2) GN=BCG_3279c PE=3 SV=1	intermediary metabolism and respiration	Rv3250c	I6YFL7	A0A0H3M8I2	6.7974	85	18.5685	18.7674	18.7975	19.1716	20.7991	18.0452	18.8428	18.6839	18.1396	18.9767	20.3266	20.1901	3	1	1	1	0	3	1	1	0	1	0	2	2	0	9.3458
PFKA_MYCTU ATP-dependent 6-phosphofructokinase OS=Mycobacterium tuberculosis (strain ATCC 25618 / H37Rv) GN=pfkA PE=1 SV=1;A0A0H3M8I4_MYCBP ATP-dependent 6-phosphofructokinase OS=Mycobacterium bovis (strain BCG / Pasteur 1173P2) GN=pfkA PE=3 SV=1	intermediary metabolism and respiration	Rv3010c	P9WID7	A0A0H3M8I4	36.88	28.6	19.2677	19.516	19.2786	21.0256	19.7953	18.1067	19.2921	20.5545	19.7946	18.7412	20.17	19.8558	6	0	0	3	2	3	1	0	2	0	1	5	4	0	33.94
O05898_MYCTU Mannose-6-phosphate isomerase OS=Mycobacterium tuberculosis (strain ATCC 25618 / H37Rv) GN=manA PE=1 SV=1;A0A0H3M8I6_MYCBP Probable mannose-6-phosphate isomerase manA OS=Mycobacterium bovis (strain BCG / Pasteur 1173P2) GN=manA PE=3 SV=1	intermediary metabolism and respiration	Rv3255c	O05898	A0A0H3M8I6	43.371	32.8	24.0503	23.9332	23.1204	24.6205	22.3288	25.5174	23.9185	24.7689	24.4221	24.4624	23.9388	21.9044	9	5	3	5	4	6	5	4	3	5	4	7	3	0	70.838
I6Y4A5_MYCTU Beta-lactamase OS=Mycobacterium tuberculosis (strain ATCC 25618 / H37Rv) GN=Rv0634c PE=1 SV=1;A0A0H3M8J1_MYCBP Possible glyoxalase II OS=Mycobacterium bovis (strain BCG / Pasteur 1173P2) GN=BCG_0681c PE=4 SV=1	virulence, detoxification and adaptation	Rv0634c	I6Y4A5	A0A0H3M8J1	25.928	65	21.3712	21.8281	21.8729	21.9699	22.556	23.944	22.1501	21.577	21.4543	22.2913	22.8497	21.7843	9	4	6	6	4	6	7	5	4	7	3	8	8	0	51.825
SECE_MYCTU Protein translocase subunit SecE OS=Mycobacterium tuberculosis (strain ATCC 25618 / H37Rv) GN=secE PE=1 SV=1;A0A0H3M8J5_MYCBP Protein translocase subunit SecE OS=Mycobacterium bovis (strain BCG / Pasteur 1173P2) GN=secE1 PE=3 SV=1	cell wall and cell processes	Rv0638	P9WGN7	A0A0H3M8J5	16.956	47.2	18.9013	18.4897	22.8122	25.5596	25.436	18.8842	19.1532	23.8994	19.249	23.9297	23.5215	23.8275	6	1	1	4	6	6	1	1	4	1	3	2	2	0	48.179
MMAA1_MYCTU Mycolic acid methyltransferase MmaA1 OS=Mycobacterium tuberculosis (strain ATCC 25618 / H37Rv) GN=mmaA1 PE=1 SV=1;A0A0H3M8J8_MYCBP Methoxy mycolic acid synthase 1 mmaA1 OS=Mycobacterium bovis (strain BCG / Pasteur 1173P2) GN=mmaA1 PE=4 SV=1	lipid metabolism	Rv0645c	P9WPB1	A0A0H3M8J8	33.149	33.2	21.0765	18.2489	18.4452	21.6367	17.452	20.8255	20.5837	21.5391	18.2696	19.5363	21.7396	21.2118	6	2	1	2	3	1	3	1	1	1	1	5	2	0	18.823
ETFB_MYCTU Electron transfer flavoprotein subunit beta OS=Mycobacterium tuberculosis (strain ATCC 25618 / H37Rv) GN=etfB PE=1 SV=1;A0A0H3M8K1_MYCBP Probable electron transfer flavoprotein (Beta-subunit) fixA OS=Mycobacterium bovis (strain BCG / Pasteur 117	intermediary metabolism and respiration	Rv3029c	P9WNG7	A0A0H3M8K1	28.08	64.3	26.1863	25.7579	26.4491	23.8766	27.3006	25.3295	26.0086	25.0259	25.7648	24.153	26.717	27.9321	13	12	10	12	10	11	12	10	9	10	7	11	11	0	323.31
I6YAY5_MYCTU Uncharacterized protein OS=Mycobacterium tuberculosis (strain ATCC 25618 / H37Rv) GN=Rv3033 PE=1 SV=1;A0A0H3M8K7_MYCBP Uncharacterized protein OS=Mycobacterium bovis (strain BCG / Pasteur 1173P2) GN=BCG_3057 PE=4 SV=1	Conserved hypotheticals	Rv3033	I6YAY5	A0A0H3M8K7	19.272	28	19.0759	19.3309	18.5861	19.6618	20.776	18.4022	18.5397	19.1673	19.9523	19.7349	18.4302	18.2389	5	1	0	2	1	5	2	0	0	0	0	2	1	0	32.977
I6YAZ1_MYCTU Conserved protein OS=Mycobacterium tuberculosis (strain ATCC 25618 / H37Rv) GN=Rv3038c PE=1 SV=1;A0A0H3M8L2_MYCBP Uncharacterized protein OS=Mycobacterium bovis (strain BCG / Pasteur 1173P2) GN=BCG_3062c PE=4 SV=1	Conserved hypotheticals	Rv3038c	I6YAZ1	A0A0H3M8L2	36.049	23.2	18.8627	18.2809	18.9226	19.1843	17.8424	19.0232	18.492	19.3163	18.6206	18.6141	20.2394	18.6015	6	3	2	1	4	3	4	0	2	0	1	6	1	0	23.566
P71733_MYCTU Conserved protein OS=Mycobacterium tuberculosis (strain ATCC 25618 / H37Rv) GN=Rv2410c PE=1 SV=1;A0A0H3M8L4_MYCBP Uncharacterized protein OS=Mycobacterium bovis (strain BCG / Pasteur 1173P2) GN=BCG_2426c PE=4 SV=1	Conserved hypotheticals	Rv2410c	P71733	A0A0H3M8L4	36.02	43.1	21.7243	20.5388	22.0923	22.8668	20.9742	22.5418	22.1814	22.6775	22.6172	22.0975	22.5988	19.1953	7	4	2	4	5	2	4	4	4	3	3	5	1	0	101.4
THT2_MYCTU Putative thiosulfate sulfurtransferase SseA OS=Mycobacterium tuberculosis (strain ATCC 25618 / H37Rv) GN=sseA PE=1 SV=1;A0A0H3M8L7_MYCBP Sulfurtransferase OS=Mycobacterium bovis (strain BCG / Pasteur 1173P2) GN=sseA PE=4 SV=1	intermediary metabolism and respiration	Rv3283	P9WHF7	A0A0H3M8L7	33.32	75.1	26.0093	25.4845	25.6937	26.5201	25.6663	25.6885	26.0199	26.504	26.0851	26.348	25.2901	26.6975	17	15	8	16	8	13	12	7	6	10	6	16	15	0	163.46
O53291_MYCTU Fe3+-citrate ABC transporter substrate-binding protein OS=Mycobacterium tuberculosis (strain ATCC 25618 / H37Rv) GN=fecB PE=1 SV=1;A0A0H3M8L8_MYCBP Probable FeIII-dicitrate-binding periplasmic lipoprotein fecB OS=Mycobacterium bovis (strain BC	cell wall and cell processes	Rv3044	O53291	A0A0H3M8L8	36.91	38.7	22.015	22.6463	18.1282	23.1535	21.1298	24.0263	23.4827	22.8915	18.5822	23.2311	22.9566	21.8438	7	2	2	1	4	7	4	1	4	1	3	5	5	0	93
P95034_MYCTU Putative ferredoxin reductase OS=Mycobacterium tuberculosis (strain ATCC 25618 / H37Rv) GN=Rv0688 PE=1 SV=1;A0A0H3M8M4_MYCBP Putative ferredoxin reductase OS=Mycobacterium bovis (strain BCG / Pasteur 1173P2) GN=BCG_0737 PE=4 SV=1	intermediary metabolism and respiration	Rv0688	P95034	A0A0H3M8M4	43.017	33.3	21.2557	19.7251	20.9162	21.2166	20.916	21.4336	19.7945	18.7746	22.3707	22.4296	22.3357	21.9625	8	5	1	5	2	6	4	1	1	2	2	5	4	0	51.308
AHPC_MYCTU Alkyl hydroperoxide reductase subunit C OS=Mycobacterium tuberculosis (strain ATCC 25618 / H37Rv) GN=ahpC PE=1 SV=1;A0A0H3M8M8_MYCBP Alkyl hydroperoxide reductase C protein ahpC OS=Mycobacterium bovis (strain BCG / Pasteur 1173P2) GN=ahpC PE=4 S	virulence, detoxification and adaptation	Rv2428	P9WQB7	A0A0H3M8M8	21.566	91.3	29.1348	29.6035	29.5839	27.4408	29.7746	29.8953	29.5405	28.3224	28.7851	28.7768	29.9113	29.2641	15	13	12	13	14	12	14	10	11	12	7	11	13	0	273.34
P95105_MYCTU Uncharacterized protein OS=Mycobacterium tuberculosis (strain ATCC 25618 / H37Rv) GN=Rv3054c PE=1 SV=4;A0A0H3M8N0_MYCBP Uncharacterized protein OS=Mycobacterium bovis (strain BCG / Pasteur 1173P2) GN=BCG_3079c PE=4 SV=1	Conserved hypotheticals	Rv3054c	P95105	A0A0H3M8N0	19.094	45.7	20.2248	20.5752	19.5824	21.5883	19.4334	21.1623	21.6602	22.9058	21.241	22.8475	22.5711	19.9472	6	2	4	2	4	4	3	3	3	5	3	5	2	0	50.231
I6Y8I5_MYCTU Conserved protein OS=Mycobacterium tuberculosis (strain ATCC 25618 / H37Rv) GN=Rv0712 PE=1 SV=1;A0A0H3M8N7_MYCBP Uncharacterized protein OS=Mycobacterium bovis (strain BCG / Pasteur 1173P2) GN=BCG_0762 PE=4 SV=1	Conserved hypotheticals	Rv0712	I6Y8I5	A0A0H3M8N7	32.743	24.7	19.0318	18.8023	19.6866	19.2651	17.3739	18.1068	20.6368	19.7842	18.59	20.0412	18.9105	19.364	4	1	1	1	0	1	2	1	1	0	1	3	1	0	7.9518
I6Y0R5_MYCTU Dihydrofolate synthase OS=Mycobacterium tuberculosis (strain ATCC 25618 / H37Rv) GN=folC PE=1 SV=1;A0A0H3M8P3_MYCBP Probable folylpolyglutamate synthase protein folC OS=Mycobacterium bovis (strain BCG / Pasteur 1173P2) GN=folC PE=4 SV=1	intermediary metabolism and respiration	Rv2447c	I6Y0R5	A0A0H3M8P3	50.779	31.6	18.7093	22.9831	18.6861	22.0274	21.4139	22.678	19.3427	22.6413	19.9554	22.9687	23.2361	18.4903	8	1	4	1	5	5	4	1	4	1	3	6	2	0	50.625
A0A0H3M8P8_MYCBP Probable succinate dehydrogenase (Iron-sulphur protein subunit) sdhB OS=Mycobacterium bovis (strain BCG / Pasteur 1173P2) GN=sdhB PE=4 SV=1;O53371_MYCTU Probable succinate dehydrogenase (Iron-sulphur protein subunit) SdhB (Succinic dehydro	intermediary metabolism and respiration	Rv3319	A0A0H3M8P8	O53371	29.349	32.7	22.3565	22.4288	22.9522	21.8977	22.8617	22.5644	23.0936	18.7217	22.433	19.8221	23.6486	21.8424	7	4	3	5	3	6	5	2	2	2	1	5	4	0	73.299
I6YF40_MYCTU Conserved protein OS=Mycobacterium tuberculosis (strain ATCC 25618 / H37Rv) GN=Rv3075c PE=1 SV=1;A0A0H3M8P9_MYCBP Uncharacterized protein OS=Mycobacterium bovis (strain BCG / Pasteur 1173P2) GN=BCG_3100c PE=3 SV=1	Conserved hypotheticals	Rv3075c	I6YF40	A0A0H3M8P9	33.1	66.8	23.3233	22.9346	22.856	23.7047	24.1257	24.2891	22.2381	23.4428	22.4054	23.1717	25.3357	22.9367	15	9	6	12	6	14	7	4	4	7	5	12	10	0	157.48
A0A0H3M8R0_MYCBP Uncharacterized protein OS=Mycobacterium bovis (strain BCG / Pasteur 1173P2) GN=BCG_0811c PE=4 SV=1;YHI1_MYCTU Uncharacterized HIT-like protein Rv0759c OS=Mycobacterium tuberculosis (strain ATCC 25618 / H37Rv) GN=Rv0759c PE=1 SV=1	Conserved hypotheticals	Rv0759c	A0A0H3M8R0	P9WML3	11.959	41.8	21.6769	19.426	21.1967	20.9316	18.7786	20.634	19.8199	21.4712	20.0399	19.9528	19.2937	20.4169	3	2	1	2	2	2	3	1	1	2	1	3	2	0	25.436
RPIB_MYCTU Ribose-5-phosphate isomerase B OS=Mycobacterium tuberculosis (strain ATCC 25618 / H37Rv) GN=rpiB PE=1 SV=1;A0A0H3M8R1_MYCBP Ribose-5-phosphate isomerase OS=Mycobacterium bovis (strain BCG / Pasteur 1173P2) GN=rpiB PE=4 SV=1	intermediary metabolism and respiration	Rv2465c	P9WKD7	A0A0H3M8R1	17.277	75.9	25.1685	24.1598	24.9299	22.8731	25.9356	24.3574	23.7877	23.6785	25.0359	23.9883	25.4253	25.5589	8	6	3	8	4	7	7	2	4	3	3	6	6	0	143.19
O05769_MYCTU Uncharacterized protein OS=Mycobacterium tuberculosis (strain ATCC 25618 / H37Rv) GN=Rv3090 PE=1 SV=1;A0A0H3M8R2_MYCBP Hypothetical alanine and valine rich protein OS=Mycobacterium bovis (strain BCG / Pasteur 1173P2) GN=BCG_3115 PE=4 SV=1	Conserved hypotheticals	Rv3090	O05769	A0A0H3M8R2	32.27	29.2	23.2371	19.4375	24.4815	23.923	19.0189	24.7315	22.7434	22.4981	24.6802	22.6983	22.4464	19.6411	5	2	1	3	3	4	2	2	3	1	2	1	0	0	117.7
A0A0H3M8R4_MYCBP Possible transcriptional regulatory protein embR2 OS=Mycobacterium bovis (strain BCG / Pasteur 1173P2) GN=embR2 PE=4 SV=1	Regulatory proteins		A0A0H3M8R4		41.79	8.4	17.317	19.4745	19.7711	18.8505	18.7042	18.4947	18.6954	19.4025	19.6376	19.7014	20.1373	17.9235	2	1	2	2	2	1	1	1	2	2	1	2	1	0	3.2642
FTSX_MYCTU Cell division protein FtsX OS=Mycobacterium tuberculosis (strain ATCC 25618 / H37Rv) GN=ftsX PE=1 SV=1;A0A0H3M8R9_MYCBP Cell division protein FtsX OS=Mycobacterium bovis (strain BCG / Pasteur 1173P2) GN=ftsX PE=3 SV=1	cell wall and cell processes	Rv3101c	P9WG19	A0A0H3M8R9	32.819	14.8	24.7824	23.425	25.7432	24.3819	19.3068	23.1071	19.6485	23.9033	24.934	22.1574	21.1433	21.5891	3	2	2	2	2	1	2	1	2	2	2	3	3	0	58.464
I6Y8R4_MYCTU Esterase OS=Mycobacterium tuberculosis (strain ATCC 25618 / H37Rv) GN=Rv0774c PE=1 SV=1;A0A0H3M8S0_MYCBP Probable conserved exported protein OS=Mycobacterium bovis (strain BCG / Pasteur 1173P2) GN=BCG_0826c PE=4 SV=1	cell wall and cell processes	Rv0774c	I6Y8R4	A0A0H3M8S0	30.654	31.7	23.7408	23.2856	23.3202	21.9994	22.8609	22.1073	24.072	18.9422	23.1102	21.5717	23.7934	22.5171	4	2	3	2	3	2	4	2	1	3	2	3	3	0	14.154
O53380_MYCTU D-alanyl-D-alanine carboxypeptidase OS=Mycobacterium tuberculosis (strain ATCC 25618 / H37Rv) GN=dacB1 PE=1 SV=1;A0A0H3M8S1_MYCBP Probable penicillin-binding protein dacB1 OS=Mycobacterium bovis (strain BCG / Pasteur 1173P2) GN=dacB1 PE=3 SV=1	cell wall and cell processes	Rv3330	O53380	A0A0H3M8S1	41.682	42	22.3262	21.6747	23.0965	22.9549	21.7936	23.1335	19.836	22.7024	22.0304	22.7571	22.4251	22.1104	9	3	2	2	5	5	5	1	3	2	3	4	1	0	81.052
A0A0H3M8S4_MYCBP Probable NADPH:adrenodoxin oxidoreductase fprA OS=Mycobacterium bovis (strain BCG / Pasteur 1173P2) GN=fprA PE=4 SV=1;FPRA_MYCTU NADPH-ferredoxin reductase FprA OS=Mycobacterium tuberculosis (strain ATCC 25618 / H37Rv) GN=fprA PE=1 SV=1	intermediary metabolism and respiration	Rv3106	A0A0H3M8S4	P9WIQ3	49.355	70.2	24.3065	23.5026	24.8397	24.4777	24.3395	24.714	23.1087	23.9599	23.5921	23.6245	25.166	24.3126	21	10	7	13	9	18	12	5	6	6	4	14	12	0	172.62
A0A0H3M8T0_MYCBP Possible transmembrane phospholipid biosynthesis bifunctionnal enzyme plsC: putative l-3-phosphoserine phosphatase + 1-ACYL-SN-GLYCEROL-3-PHOSPHATE ACYLTRANSFERASE OS=Mycobacterium bovis (strain BCG / Pasteur 1173P2) GN=plsC PE=4 SV=1;I6YD	lipid metabolism	Rv2483c	A0A0H3M8T0	I6YDI9	61.741	25.5	23.561	22.8175	25.1298	23.5876	21.5823	23.6362	20.7683	23.017	22.6242	22.1432	21.5666	22.4923	8	4	5	4	6	4	6	2	5	3	4	4	3	0	87.896
A0A0H3M8T3_MYCBP Probable O-acetylhomoserine sulfhydrylase metC OS=Mycobacterium bovis (strain BCG / Pasteur 1173P2) GN=metC PE=3 SV=1;O53390_MYCTU Probable O-acetylhomoserine sulfhydrylase MetC (Homocysteine synthase) (O-acetylhomoserine (Thiol)-lyase) (O	intermediary metabolism and respiration	Rv3340	A0A0H3M8T3	O53390	47.357	53.7	24.9274	23.7039	25.3393	24.9492	22.5779	24.0807	23.7525	24.9807	24.5336	24.6374	23.117	24.7694	11	5	4	7	7	4	7	5	4	6	4	6	5	0	108.14
O06633_MYCTU Conserved protein OS=Mycobacterium tuberculosis (strain ATCC 25618 / H37Rv) GN=Rv0801 PE=1 SV=1;A0A0H3M8T9_MYCBP Uncharacterized protein OS=Mycobacterium bovis (strain BCG / Pasteur 1173P2) GN=BCG_0853 PE=4 SV=1	Conserved hypotheticals	Rv0801	O06633	A0A0H3M8T9	12.512	86.1	20.8238	21.9975	21.603	21.8533	23.3807	22.4003	21.5581	21.9221	21.7776	22.3426	22.5219	21.8784	9	7	2	7	4	8	8	4	4	4	3	7	7	0	56.443
A0A0H3M8U4_MYCBP PPE family protein OS=Mycobacterium bovis (strain BCG / Pasteur 1173P2) GN=PPE50 PE=4 SV=1;PPE50_MYCTU Uncharacterized PPE family protein PPE50 OS=Mycobacterium tuberculosis (strain ATCC 25618 / H37Rv) GN=PPE50 PE=1 SV=1	PE/PPE families	Rv3135	A0A0H3M8U4	Q6MX07	38.408	32	23.1367	22.3395	22.3763	22.2377	18.2909	21.8816	22.9455	19.2143	22.377	20.0395	22.366	22.3088	4	4	4	3	2	1	3	2	1	2	1	2	2	0	18.869
P95186_MYCTU Acyl-CoA dehydrogenase OS=Mycobacterium tuberculosis (strain ATCC 25618 / H37Rv) GN=fadE23 PE=1 SV=1;A0A0H3M8U8_MYCBP Probable acyl-CoA dehydrogenase fadE23 OS=Mycobacterium bovis (strain BCG / Pasteur 1173P2) GN=fadE23 PE=3 SV=1	lipid metabolism	Rv3140	P95186	A0A0H3M8U8	43.344	39.9	23.8915	24.4397	25.6297	23.8593	24.7596	24.5525	24.2966	23.5779	25.4922	24.1512	23.4348	24.89	11	4	5	9	6	7	7	2	4	4	4	7	6	0	144.89
BKDA_MYCTU 3-methyl-2-oxobutanoate dehydrogenase subunit alpha OS=Mycobacterium tuberculosis (strain ATCC 25618 / H37Rv) GN=bkdA PE=1 SV=1;A0A0H3M8U9_MYCBP Probable pyruvate dehydrogenase E1 component (Alpha subunit) pdhA OS=Mycobacterium bovis (strain BCG	intermediary metabolism and respiration	Rv2497c	P9WIS3	A0A0H3M8U9	40.615	21	17.7762	18.8062	18.2476	18.7102	20.0611	17.4188	19.5669	19.6022	18.9408	18.9598	19.1775	19.2076	7	2	0	3	1	6	4	0	1	0	0	4	2	0	23.625
O53830_MYCTU Transcriptional regulatory protein OS=Mycobacterium tuberculosis (strain ATCC 25618 / H37Rv) GN=Rv0818 PE=1 SV=3;A0A0H3M8W1_MYCBP Transcriptional regulatory protein OS=Mycobacterium bovis (strain BCG / Pasteur 1173P2) GN=BCG_0870 PE=4 SV=1	Regulatory proteins	Rv0818	O53830	A0A0H3M8W1	27.597	46.7	23.676	22.04	23.3668	23.8136	23.6363	23.4536	22.8023	23.2039	23.6346	23.0321	22.6017	20.9243	9	7	3	9	4	7	4	1	2	1	2	8	5	0	135.28
DESA1_MYCTU Putative acyl-[acyl-carrier-protein] desaturase DesA1 OS=Mycobacterium tuberculosis (strain ATCC 25618 / H37Rv) GN=desA1 PE=1 SV=1;A0A0H3M8W5_MYCBP Probable acyl-[acyl-carrier protein] desaturase desA1 OS=Mycobacterium bovis (strain BCG / Paste	lipid metabolism	Rv0824c	P9WNZ7	A0A0H3M8W5	38.77	75.4	27.6674	27.1589	27.0863	26.7645	24.7805	25.9722	26.6373	26.0576	26.2943	26.7803	27.9332	26.2978	18	11	7	11	9	11	10	7	9	7	6	11	11	0	158.49
I6Y9K2_MYCTU Probable restriction system protein Mrr OS=Mycobacterium tuberculosis (strain ATCC 25618 / H37Rv) GN=mrr PE=1 SV=1;A0A0H3M8X2_MYCBP Probable restriction system protein mrr OS=Mycobacterium bovis (strain BCG / Pasteur 1173P2) GN=mrr PE=4 SV=1	information pathways	Rv2528c	I6Y9K2	A0A0H3M8X2	33.648	13.7	18.7191	18.7847	17.6339	19.781	19.5336	20.035	20.3533	18.5188	19.9901	18.992	18.7053	17.6949	5	1	1	1	2	5	2	0	0	0	0	1	0	0	17.153
O50398_MYCTU Conserved protein OS=Mycobacterium tuberculosis (strain ATCC 25618 / H37Rv) GN=Rv3369 PE=1 SV=1;A0A0H3M8Y7_MYCBP Uncharacterized protein OS=Mycobacterium bovis (strain BCG / Pasteur 1173P2) GN=BCG_3441 PE=4 SV=1	Conserved hypotheticals	Rv3369	O50398	A0A0H3M8Y7	15.718	38.9	26.0181	24.8336	24.9647	25.0676	22.4445	26.1651	25.8448	26.0692	25.4484	25.7495	24.7874	23.9366	4	3	3	3	3	3	3	2	3	3	3	2	3	0	31.794
I6Y4Z9_MYCTU Uncharacterized protein OS=Mycobacterium tuberculosis (strain ATCC 25618 / H37Rv) GN=Rv0857 PE=4 SV=1;A0A0H3M8Y9_MYCBP Uncharacterized protein OS=Mycobacterium bovis (strain BCG / Pasteur 1173P2) GN=BCG_0909 PE=4 SV=1	Conserved hypotheticals	Rv0857	I6Y4Z9	A0A0H3M8Y9	17.649	47.1	18.5077	20.0248	22.3565	21.384	17.226	21.6383	22.2732	18.1727	25.0125	22.1514	21.6857	18.3511	3	1	1	2	2	0	2	2	1	2	2	3	1	0	13.661
Y3376_MYCTU Phosphatase Rv3376 OS=Mycobacterium tuberculosis (strain ATCC 25618 / H37Rv) GN=Rv3376 PE=1 SV=1;A0A0H3M8Z2_MYCBP Uncharacterized protein OS=Mycobacterium bovis (strain BCG / Pasteur 1173P2) GN=BCG_3447 PE=4 SV=1	Conserved hypotheticals	Rv3376	P9WMS5	A0A0H3M8Z2	23.664	47	21.4337	22.4135	22.4797	23.1062	23.7722	23.3968	22.3089	22.6126	22.0495	21.6336	23.6996	22.9609	10	4	2	5	5	7	6	3	3	2	4	6	3	0	56.827
O05861_MYCTU Conserved protein OS=Mycobacterium tuberculosis (strain ATCC 25618 / H37Rv) GN=Rv3205c PE=1 SV=1;A0A0H3M8Z6_MYCBP Uncharacterized protein OS=Mycobacterium bovis (strain BCG / Pasteur 1173P2) GN=BCG_3231c PE=4 SV=1	Conserved hypotheticals	Rv3205c	O05861	A0A0H3M8Z6	31.351	27.7	23.0576	23.2317	22.5156	23.1165	20.4783	22.3763	23.1978	23.1165	23.8969	23.6986	23.0339	21.4996	5	3	3	2	4	3	4	3	3	3	4	3	3	0	27.686
Y2564_MYCTU Uncharacterized ABC transporter ATP-binding protein Rv2564 OS=Mycobacterium tuberculosis (strain ATCC 25618 / H37Rv) GN=Rv2564 PE=1 SV=1;A0A0H3M8Z8_MYCBP Probable glutamine-transport ATP-binding protein ABC transporter glnQ OS=Mycobacterium bov	cell wall and cell processes	Rv2564	P9WQI5	A0A0H3M8Z8	35.428	62.7	27.0517	24.9254	26.7099	26.7223	23.0805	26.3323	25.2728	26.1116	26.087	24.8346	24.2646	23.7416	10	5	4	8	1	5	4	3	1	3	2	6	4	0	152.83
Y2568_MYCTU Uncharacterized protein Rv2568c OS=Mycobacterium tuberculosis (strain ATCC 25618 / H37Rv) GN=Rv2568c PE=1 SV=1;A0A0H3M904_MYCBP Uncharacterized protein OS=Mycobacterium bovis (strain BCG / Pasteur 1173P2) GN=BCG_2591c PE=4 SV=1	Conserved hypotheticals	Rv2568c	P9WL95	A0A0H3M904	38.002	31.7	21.0596	20.1299	21.4549	22.4258	19.1014	22.4548	19.7277	22.127	21.0024	21.2648	21.467	18.7761	6	4	2	4	5	4	4	1	3	4	3	4	2	0	14.858
A0A0H3M906_MYCBP Uncharacterized protein OS=Mycobacterium bovis (strain BCG / Pasteur 1173P2) GN=BCG_3258 PE=3 SV=1;O05873_MYCTU GTPase EngC OS=Mycobacterium tuberculosis (strain ATCC 25618 / H37Rv) GN=Rv3228 PE=1 SV=1;A0A0H3M961_MYCBP Uncharacterized prot	Conserved hypotheticals	Rv3228	A0A0H3M906	O05873	34.933	40.3	24.4842	22.3419	22.7246	23.7938	20.9519	23.4695	23.6154	23.4278	23.0377	23.0916	22.5188	22.5936	8	3	2	4	4	5	4	3	5	3	3	5	2	0	37.478
Y877_MYCTU Uncharacterized protein Rv0877 OS=Mycobacterium tuberculosis (strain ATCC 25618 / H37Rv) GN=Rv0877 PE=1 SV=1;A0A0H3M907_MYCBP Uncharacterized protein OS=Mycobacterium bovis (strain BCG / Pasteur 1173P2) GN=BCG_0929 PE=4 SV=1	Conserved hypotheticals	Rv0877	P9WKR3	A0A0H3M907	27.469	38.5	21.3569	18.4915	20.9651	18.2227	20.5991	17.6506	18.5601	20.1639	18.815	19.1735	21.5408	21.7408	4	3	0	4	1	3	2	1	0	2	0	3	3	0	19
A0A0H3M917_MYCBP Uncharacterized protein OS=Mycobacterium bovis (strain BCG / Pasteur 1173P2) GN=BCG_0939c PE=4 SV=1;Y887_MYCTU Uncharacterized protein Rv0887c OS=Mycobacterium tuberculosis (strain ATCC 25618 / H37Rv) GN=Rv0887c PE=1 SV=1	Conserved hypotheticals	Rv0887c	A0A0H3M917	P9WKQ3	16.098	36.2	21.8708	20.0785	19.5578	19.937	18.6795	20.0733	20.525	20.8288	20.1367	20.8148	19.8353	19.0115	4	1	1	1	2	2	1	2	2	1	2	1	0	0	28.941
SECF_MYCTU Protein translocase subunit SecF OS=Mycobacterium tuberculosis (strain ATCC 25618 / H37Rv) GN=secF PE=1 SV=1;A0A0H3M918_MYCBP Protein-export membrane protein SecF OS=Mycobacterium bovis (strain BCG / Pasteur 1173P2) GN=secF PE=3 SV=1	cell wall and cell processes	Rv2586c	P9WGN9	A0A0H3M918	47.013	14	17.0781	18.6683	18.5004	19.9409	17.8862	18.5993	19.43	18.9767	19.6329	19.4339	17.444	18.0666	5	1	2	2	2	3	2	1	2	2	1	3	3	0	14.352
Y3404_MYCTU Uncharacterized protein Rv3404c OS=Mycobacterium tuberculosis (strain ATCC 25618 / H37Rv) GN=Rv3404c PE=1 SV=1;A0A0H3M919_MYCBP Uncharacterized protein OS=Mycobacterium bovis (strain BCG / Pasteur 1173P2) GN=BCG_3474c PE=4 SV=1	Conserved hypotheticals	Rv3404c	P9WKZ3	A0A0H3M919	26.515	23.1	18.806	19.9066	18.9847	19.5129	17.7696	20.5664	19.407	18.3996	19.2392	19.3813	18.9247	18.8044	4	1	1	2	3	1	3	1	2	1	2	3	1	0	4.2703
Y898_MYCTU Uncharacterized protein Rv0898c OS=Mycobacterium tuberculosis (strain ATCC 25618 / H37Rv) GN=Rv0898c PE=1 SV=1;A0A0H3M924_MYCBP Uncharacterized protein OS=Mycobacterium bovis (strain BCG / Pasteur 1173P2) GN=BCG_0950c PE=4 SV=1	Conserved hypotheticals	Rv0898c	P9WKP5	A0A0H3M924	9.92	70.1	19.8942	20.1082	19.9018	20.0675	24.5545	19.7818	21.5	19.0978	18.3017	18.6266	20.6435	19.692	5	3	1	4	4	3	4	3	3	1	1	4	3	0	241.47
CHOD_MYCTU Cholesterol oxidase OS=Mycobacterium tuberculosis (strain ATCC 25618 / H37Rv) GN=choD PE=1 SV=1;A0A0H3M926_MYCBP Probable cholesterol oxidase choD OS=Mycobacterium bovis (strain BCG / Pasteur 1173P2) GN=choD PE=4 SV=1	lipid metabolism	Rv3409c	P9WMV9	A0A0H3M926	63.023	7.1	23.7596	19.3711	24.4299	23.8077	18.8748	22.5007	18.1554	23.3392	23.2792	21.5224	20.0904	22.4393	2	2	1	2	2	0	2	1	2	2	2	2	2	0	36.485
Y906_MYCTU Uncharacterized protein Rv0906 OS=Mycobacterium tuberculosis (strain ATCC 25618 / H37Rv) GN=Rv0906 PE=1 SV=1;A0A0H3M928_MYCBP Uncharacterized protein OS=Mycobacterium bovis (strain BCG / Pasteur 1173P2) GN=BCG_0958 PE=4 SV=1	Conserved hypotheticals	Rv0906	P9WKP3	A0A0H3M928	40.641	16.4	19.1175	19.6093	18.7413	20.837	17.6617	20.5433	21.2587	19.7744	19.2769	19.6316	19.5378	18.7734	4	1	2	2	3	0	3	0	2	1	2	3	1	0	10.494
RPSD_MYCTU ECF RNA polymerase sigma factor SigD OS=Mycobacterium tuberculosis (strain ATCC 25618 / H37Rv) GN=sigD PE=1 SV=1;A0A0H3M932_MYCBP RNA polymerase sigma factor OS=Mycobacterium bovis (strain BCG / Pasteur 1173P2) GN=sigD PE=3 SV=1	information pathways	Rv3414c	P9WGG9	A0A0H3M932	22.919	37.7	22.2017	19.2907	22.0744	20.6105	21.2714	20.3787	19.8962	20.6539	19.8435	17.5497	20.2396	21.7542	6	1	1	2	1	5	2	1	1	1	1	3	3	0	16.931
I6XA34_MYCTU Conserved protein OS=Mycobacterium tuberculosis (strain ATCC 25618 / H37Rv) GN=Rv0911 PE=1 SV=1;A0A0H3M933_MYCBP Uncharacterized protein OS=Mycobacterium bovis (strain BCG / Pasteur 1173P2) GN=BCG_0963 PE=4 SV=1	Conserved hypotheticals	Rv0911	I6XA34	A0A0H3M933	27.626	67.7	22.569	19.3993	23.4108	22.2413	17.7143	23.119	19.2294	18.9219	23.1333	20.1077	19.468	23.6644	7	3	0	3	3	4	2	1	0	2	1	3	1	0	22.63
RMLD_MYCTU dTDP-4-dehydrorhamnose reductase OS=Mycobacterium tuberculosis (strain ATCC 25618 / H37Rv) GN=rmlD PE=1 SV=1;A0A0H3M936_MYCBP Possible dTDP-rhamnose modification protein rmlD OS=Mycobacterium bovis (strain BCG / Pasteur 1173P2) GN=rmld PE=4 SV=1	intermediary metabolism and respiration	Rv3266c	P9WH09	A0A0H3M936	32.044	39.5	18.7211	19.1513	18.5673	21.4713	19.1573	21.6039	19.4827	20.5978	18.7011	20.4895	20.3771	19.3879	8	3	1	6	4	8	4	1	3	1	3	5	1	0	70.716
I6WZS8_MYCTU Diacylglycerol kinase OS=Mycobacterium tuberculosis (strain ATCC 25618 / H37Rv) GN=Rv0926c PE=1 SV=1;A0A0H3M944_MYCBP Uncharacterized protein OS=Mycobacterium bovis (strain BCG / Pasteur 1173P2) GN=BCG_0978c PE=4 SV=1	Conserved hypotheticals	Rv0926c	I6WZS8	A0A0H3M944	37.751	54.7	24.7666	23.4819	24.3629	24.7681	23.465	24.8885	24.8193	24.4522	24.3149	24.4717	25.3268	24.7262	12	8	5	8	3	10	6	4	3	6	3	6	10	0	98.142
GLMS_MYCTU Glutamine--fructose-6-phosphate aminotransferase [isomerizing] OS=Mycobacterium tuberculosis (strain ATCC 25618 / H37Rv) GN=glmS PE=1 SV=1;A0A0H3M947_MYCBP Glutamine--fructose-6-phosphate aminotransferase [isomerizing] OS=Mycobacterium bovis (st	intermediary metabolism and respiration	Rv3436c	P9WN49	A0A0H3M947	67.571	28.5	21.1891	21.4448	21.6851	22.95	18.0727	22.2294	21.0297	21.4147	20.4633	21.4902	22.0068	21.087	11	3	3	6	6	3	5	3	4	2	1	5	4	0	75.761
PURK_MYCTU N5-carboxyaminoimidazole ribonucleotide synthase OS=Mycobacterium tuberculosis (strain ATCC 25618 / H37Rv) GN=purK PE=1 SV=1;A0A0H3M949_MYCBP N5-carboxyaminoimidazole ribonucleotide synthase OS=Mycobacterium bovis (strain BCG / Pasteur 1173P2) G	intermediary metabolism and respiration	Rv3276c	P9WHL9	A0A0H3M949	45.695	32.2	21.7464	19.2099	21.1162	21.9779	19.9145	21.468	20.4215	21.5882	19.6434	19.8406	23.1975	21.6823	8	2	1	5	4	5	4	1	4	0	1	5	3	0	32.814
PSTS1_MYCBP Phosphate-binding protein PstS1 OS=Mycobacterium bovis (strain BCG / Pasteur 1173P2) GN=pstS1 PE=1 SV=1;PSTS1_MYCTU Phosphate-binding protein PstS 1 OS=Mycobacterium tuberculosis (strain ATCC 25618 / H37Rv) GN=pstS1 PE=1 SV=1	cell wall and cell processes	Rv0934	A0A0H3M950	P9WGU1	38.215	51.3	28.8042	29.0697	28.7273	28.2551	27.6	29.8409	28.403	28.3367	27.8102	28.7415	28.9982	27.6615	9	5	8	6	7	7	8	6	7	6	7	8	9	0	221.16
A0A0H3M954_MYCBP Uncharacterized protein OS=Mycobacterium bovis (strain BCG / Pasteur 1173P2) GN=BCG_3310 PE=4 SV=1;P96886_MYCTU Probable bifunctional protein acetyl-/propionyl-coenzyme A carboxylase (Epsilon chain) AccE5 OS=Mycobacterium tuberculosis (str	lipid metabolism	Rv3281	A0A0H3M954	P96886	16.887	59.6	24.5902	24.6467	23.7831	24.2983	24.2939	25.2354	24.645	24.307	24.4926	24.4495	25.7492	22.8536	7	4	5	4	5	5	6	4	4	4	4	6	3	0	53.643
A0A0H3M962_MYCBP tRNA pseudouridine synthase A OS=Mycobacterium bovis (strain BCG / Pasteur 1173P2) GN=truA PE=3 SV=1;TRUA_MYCTU tRNA pseudouridine synthase A OS=Mycobacterium tuberculosis (strain ATCC 25618 / H37Rv) GN=truA PE=1 SV=1	information pathways	Rv3455c	A0A0H3M962	P9WHP9	28.092	16.4	21.0821	20.7716	20.8225	22.2865	17.9791	20.7968	21.094	22.4596	20.6572	22.0753	20.4863	20.5726	3	2	3	1	2	0	3	2	2	2	1	3	2	0	23.353
PUR3_MYCTU Phosphoribosylglycinamide formyltransferase OS=Mycobacterium tuberculosis (strain ATCC 25618 / H37Rv) GN=purN PE=1 SV=1;A0A0H3M967_MYCBP Phosphoribosylglycinamide formyltransferase OS=Mycobacterium bovis (strain BCG / Pasteur 1173P2) GN=purN PE=	intermediary metabolism and respiration	Rv0956	P9WHM5	A0A0H3M967	22.415	42.8	21.5304	20.5176	21.4801	20.8641	18.4118	19.7213	20.1958	21.5974	20.9373	21.3017	20.879	20.6243	5	1	1	2	3	2	2	1	3	1	3	3	3	0	21.84
O53370_MYCTU Succinate dehydrogenase flavoprotein subunit OS=Mycobacterium tuberculosis (strain ATCC 25618 / H37Rv) GN=sdhA PE=1 SV=1;A0A0H3M977_MYCBP Succinate dehydrogenase flavoprotein subunit OS=Mycobacterium bovis (strain BCG / Pasteur 1173P2) GN=sdhA	intermediary metabolism and respiration	Rv3318	O53370	A0A0H3M977	64.825	31.9	22.8721	23.6851	23.3373	24.1287	23.2737	24.0164	20.5372	22.0307	23.4349	22.2155	22.6094	22.1114	12	4	2	7	6	7	3	1	2	4	3	6	3	0	56.699
A0A0H3M981_MYCBP Probable acyl-CoA dehydrogenase fadE12 OS=Mycobacterium bovis (strain BCG / Pasteur 1173P2) GN=fadE12 PE=3 SV=1;ACDC_MYCTU Acyl-CoA dehydrogenase fadE12 OS=Mycobacterium tuberculosis (strain ATCC 25618 / H37Rv) GN=fadE12 PE=1 SV=1	lipid metabolism	Rv0972c	A0A0H3M981	P9WQG3	41.524	20.9	18.5887	19.7663	18.1633	21.2849	17.4961	23.2912	19.5525	18.9003	24.3596	21.701	20.683	18.2635	3	1	1	1	3	0	3	1	2	2	2	2	1	0	67.437
I6X7F2_MYCTU Possible exported protein OS=Mycobacterium tuberculosis (strain ATCC 25618 / H37Rv) GN=Rv3483c PE=1 SV=1;A0A0H3M982_MYCBP Uncharacterized protein OS=Mycobacterium bovis (strain BCG / Pasteur 1173P2) GN=BCG_3547c PE=4 SV=1	cell wall and cell processes	Rv3483c	I6X7F2	A0A0H3M982	22.982	22.7	18.756	17.6205	18.3546	22.6162	18.5241	23.7681	22.8452	22.9474	20.5941	23.2952	21.5354	18.8467	3	1	1	2	1	3	1	1	1	1	1	2	1	0	11.354
Q6MWY3_MYCTU Molybdopterin synthase sulfur carrier subunit OS=Mycobacterium tuberculosis (strain ATCC 25618 / H37Rv) GN=moaX PE=3 SV=1;A0A0H3M984_MYCBP Molybdopterin synthase sulfur carrier subunit OS=Mycobacterium bovis (strain BCG / Pasteur 1173P2) GN=mo	intermediary metabolism and respiration	Rv3323c	Q6MWY3	A0A0H3M984	24.05	29.4	19.7493	18.8422	17.7645	18.6478	19.6653	19.5977	19.8511	20.0957	17.8492	19.6438	20.3843	19.4002	5	3	1	4	3	4	2	1	2	2	0	3	2	0	16.164
I6X7F9_MYCTU PadR family transcriptional regulator OS=Mycobacterium tuberculosis (strain ATCC 25618 / H37Rv) GN=Rv3488 PE=1 SV=1;A0A0H3M987_MYCBP Uncharacterized protein OS=Mycobacterium bovis (strain BCG / Pasteur 1173P2) GN=BCG_3552 PE=4 SV=1	Conserved hypotheticals	Rv3488	I6X7F9	A0A0H3M987	11.928	43.9	18.6607	17.6753	17.8347	19.3739	19.0996	20.0024	20.1493	18.6465	18.1847	20.0477	17.7039	18.6297	3	0	1	1	2	2	2	1	2	2	2	2	2	0	39.659
O53897_MYCTU Molybdenum cofactor biosynthesis protein OS=Mycobacterium tuberculosis (strain ATCC 25618 / H37Rv) GN=moaB2 PE=1 SV=3;A0A0H3M991_MYCBP Possible pterin-4-alpha-carbinolamine dehydratase moaB2 OS=Mycobacterium bovis (strain BCG / Pasteur 1173P2)	intermediary metabolism and respiration	Rv0984	O53897	A0A0H3M991	18.441	63.5	23.9395	23.6873	24.0716	22.5064	25.274	23.3839	23.6122	23.6371	23.6443	24.3873	24.5799	24.7147	6	3	5	5	5	4	5	4	4	5	2	5	4	0	173.06
I6Y1G8_MYCTU Methyltransferase OS=Mycobacterium tuberculosis (strain ATCC 25618 / H37Rv) GN=Rv2675c PE=1 SV=1;A0A0H3M992_MYCBP Uncharacterized protein OS=Mycobacterium bovis (strain BCG / Pasteur 1173P2) GN=BCG_2688c PE=4 SV=1	Conserved hypotheticals	Rv2675c	I6Y1G8	A0A0H3M992	27.545	16.8	20.8457	19.3668	20.0674	20.8128	18.2376	21.3736	19.935	20.3356	20.5569	20.3761	20.335	19.2264	2	1	1	1	2	0	1	1	1	1	1	1	1	0	16.625
A0A0H3M9A7_MYCBP TRK system potassium uptake protein ceoC OS=Mycobacterium bovis (strain BCG / Pasteur 1173P2) GN=ceoC PE=4 SV=1;TRKA_MYCTU Trk system potassium uptake protein TrkA OS=Mycobacterium tuberculosis (strain ATCC 25618 / H37Rv) GN=trkA PE=1 SV=1	cell wall and cell processes	Rv2692	A0A0H3M9A7	P9WFZ3	23.933	58.6	21.9459	22.3032	22.7918	18.4592	21.5954	22.1277	22.6043	22.7265	21.6081	22.1617	22.7576	21.3969	8	3	2	4	1	6	5	2	2	3	3	4	7	0	63.833
ILVX_MYCTU Putative acetolactate synthase large subunit IlvX OS=Mycobacterium tuberculosis (strain ATCC 25618 / H37Rv) GN=ilvX PE=1 SV=1;A0A0H3M9A9_MYCBP Probable acetohydroxyacid synthase ilvX OS=Mycobacterium bovis (strain BCG / Pasteur 1173P2) GN=ilvX P	intermediary metabolism and respiration	Rv3509c	O53554	A0A0H3M9A9	52.072	68.2	24.6546	24.7149	25.0188	25.1078	24.8622	25.7703	24.5946	25.1778	24.1978	24.6756	26.3899	23.7521	21	12	9	14	9	17	15	8	8	7	6	15	13	0	323.31
FAC19_MYCTU Long-chain-fatty-acid--CoA/3-oxocholest-4-en-26-oate--CoA ligase OS=Mycobacterium tuberculosis (strain ATCC 25618 / H37Rv) GN=fadD19 PE=1 SV=1;A0A0H3M9B4_MYCBP Probable fatty-acid-CoA ligase fadD19 OS=Mycobacterium bovis (strain BCG / Pasteur 1	lipid metabolism	Rv3513c/Rv3515c	P9WQ51	A0A0H3M9B4	59.74	26.1	18.9827	19.3077	19.9342	17.6956	17.2845	17.4425	20.2546	19.879	19.9476	18.9217	21.175	19.5622	9	1	1	2	0	4	1	0	0	2	0	5	4	0	21.631
SIGA_MYCTU RNA polymerase sigma factor SigA OS=Mycobacterium tuberculosis (strain ATCC 25618 / H37Rv) GN=sigA PE=1 SV=1;A0A0H3M9B7_MYCBP RNA polymerase sigma factor SigA OS=Mycobacterium bovis (strain BCG / Pasteur 1173P2) GN=sigA PE=3 SV=1	information pathways	Rv2703	P9WGI1	A0A0H3M9B7	57.8	30.9	24.1255	24.2379	24.5395	23.9806	24.857	23.7432	23.2845	24.0731	24.1177	23.8601	22.9106	23.4029	13	8	4	10	6	12	7	1	2	4	1	8	7	0	133.25
KPRS_MYCTU Ribose-phosphate pyrophosphokinase OS=Mycobacterium tuberculosis (strain ATCC 25618 / H37Rv) GN=prs PE=1 SV=1;A0A0H3M9B8_MYCBP Ribose-phosphate pyrophosphokinase OS=Mycobacterium bovis (strain BCG / Pasteur 1173P2) GN=prsA PE=3 SV=1	intermediary metabolism and respiration	Rv1017c	P9WKE3	A0A0H3M9B8	35.477	78.2	26.8419	26.4324	26.2186	27.1659	24.7492	27.5646	26.4198	27.3497	26.7341	26.9756	26.5707	24.4544	17	12	7	12	10	15	11	6	10	8	9	11	15	0	170.48
O53564_MYCTU Acetoacetate decarboxylase OS=Mycobacterium tuberculosis (strain ATCC 25618 / H37Rv) GN=Rv3519 PE=1 SV=1;A0A0H3M9B9_MYCBP Uncharacterized protein OS=Mycobacterium bovis (strain BCG / Pasteur 1173P2) GN=BCG_3583 PE=4 SV=1	Conserved hypotheticals	Rv3519	O53564	A0A0H3M9B9	25.96	28	19.3919	21.7775	21.867	21.8813	17.2642	22.1455	19.9668	19.4453	19.4565	19.3618	21.8975	18.4352	4	2	2	3	3	0	3	2	1	1	1	3	0	0	19.879
I6X562_MYCTU Uncharacterized protein OS=Mycobacterium tuberculosis (strain ATCC 25618 / H37Rv) GN=Rv2708c PE=1 SV=1;A0A0H3M9C3_MYCBP Uncharacterized protein OS=Mycobacterium bovis (strain BCG / Pasteur 1173P2) GN=BCG_2721c PE=4 SV=1	Conserved hypotheticals	Rv2708c	I6X562	A0A0H3M9C3	8.9621	40.2	19.1614	19.1294	18.8615	18.8282	19.2675	19.8337	18.2159	19.755	18.4894	18.4795	20.3468	19.4371	2	2	1	2	0	2	2	1	0	0	0	2	1	0	25.373
A0A0H3M9C6_MYCBP Conserved hypothetical alanine and leucine rich protein OS=Mycobacterium bovis (strain BCG / Pasteur 1173P2) GN=BCG_2727 PE=4 SV=1;I6YA29_MYCTU Conserved alanine and leucine rich protein OS=Mycobacterium tuberculosis (strain ATCC 25618 / H	Conserved hypotheticals	Rv2714	A0A0H3M9C6	I6YA29	35.59	67.9	22.5422	25.0687	23.0438	22.4368	23.4578	24.8016	24.9806	23.6599	23.9933	24.7227	24.2516	23.7166	12	6	4	8	5	8	7	4	4	5	5	6	7	0	124.36
I6XHH5_MYCTU 2-keto-4-pentenoate hydratase OS=Mycobacterium tuberculosis (strain ATCC 25618 / H37Rv) GN=hsaE PE=1 SV=1;A0A0H3M9C8_MYCBP Probable hydratase OS=Mycobacterium bovis (strain BCG / Pasteur 1173P2) GN=BCG_3600c PE=4 SV=1	intermediary metabolism and respiration	Rv3536c	I6XHH5	A0A0H3M9C8	27.891	32.2	18.8992	19.9609	18.2502	18.3384	19.793	19.8634	19.6253	19.0545	20.3296	19.456	23.0416	21.4047	5	0	2	2	1	4	1	0	0	1	1	2	4	0	22.608
FADA5_MYCTU Steroid 3-ketoacyl-CoA thiolase OS=Mycobacterium tuberculosis (strain ATCC 25618 / H37Rv) GN=fadA5 PE=1 SV=1;A0A0H3M9D3_MYCBP Probable acetyl-CoA acetyltransferase fadA5 OS=Mycobacterium bovis (strain BCG / Pasteur 1173P2) GN=fadA5 PE=3 SV=1	lipid metabolism	Rv3546	I6XHI4	A0A0H3M9D3	41.328	17.1	19.4236	18.4846	17.9694	18.7799	17.9416	19.0785	20.3597	18.9222	19.826	19.4096	20.3702	18.7416	3	1	0	1	0	1	1	0	0	0	0	3	2	0	16.541
EPHG_MYCTU Epoxide hydrolase EphG OS=Mycobacterium tuberculosis (strain ATCC 25618 / H37Rv) GN=ephG PE=1 SV=1;A0A0H3M9D6_MYCBP Epoxide hydrolase OS=Mycobacterium bovis (strain BCG / Pasteur 1173P2) GN=ephG PE=4 SV=1	virulence, detoxification and adaptation	Rv2740	O33283	A0A0H3M9D6	16.593	57	18.7801	21.2147	20.2649	21.0727	19.856	20.8884	20.7893	20.1417	20.4005	19.9128	22.0576	19.0009	5	1	3	2	2	4	2	2	1	2	1	3	1	0	19.12
I6XHJ3_MYCTU Acetyl-CoA acetyltransferase OS=Mycobacterium tuberculosis (strain ATCC 25618 / H37Rv) GN=fadA6 PE=1 SV=1;A0A0H3M9D7_MYCBP Probable acetyl-CoA acetyltransferase fadA6 OS=Mycobacterium bovis (strain BCG / Pasteur 1173P2) GN=fadA6 PE=3 SV=1	lipid metabolism	Rv3556c	I6XHJ3	A0A0H3M9D7	40.902	46.4	20.9133	20.8117	20.1924	23.1327	21.592	22.9619	20.6132	22.0817	20.709	21.4818	23.5591	20.7177	12	4	1	5	4	10	6	1	2	1	1	8	2	0	36.892
FTSK_MYCTU DNA translocase FtsK OS=Mycobacterium tuberculosis (strain ATCC 25618 / H37Rv) GN=ftsK PE=1 SV=1;A0A0H3M9E6_MYCBP Possible cell division transmembrane protein ftsK OS=Mycobacterium bovis (strain BCG / Pasteur 1173P2) GN=ftsK PE=3 SV=1	cell wall and cell processes	Rv2748c	P9WNA3	A0A0H3M9E6	88.886	16	19.5157	21.7469	21.754	21.6969	20.1703	21.7686	18.4363	21.3162	20.3002	18.5037	22.2348	22.5939	8	1	3	2	3	5	4	0	3	1	1	5	2	0	39.726
O50397_MYCTU Nitroreductase OS=Mycobacterium tuberculosis (strain ATCC 25618 / H37Rv) GN=Rv3368c PE=1 SV=1;A0A0H3M9E7_MYCBP Possible oxidoreductase OS=Mycobacterium bovis (strain BCG / Pasteur 1173P2) GN=BCG_3440c PE=4 SV=1	intermediary metabolism and respiration	Rv3368c	O50397	A0A0H3M9E7	23.733	63.1	17.9691	24.2434	22.2608	24.6998	23.4741	25.7526	24.6368	23.8975	24.2959	24.361	23.7718	23.0642	11	2	6	8	6	8	5	4	5	5	5	10	8	0	82.863
NAT_MYCTU Arylamine N-acetyltransferase OS=Mycobacterium tuberculosis (strain ATCC 25618 / H37Rv) GN=nat PE=1 SV=1;A0A0H3M9E9_MYCBP Arylamine n-acetyltransferase nat OS=Mycobacterium bovis (strain BCG / Pasteur 1173P2) GN=nat PE=4 SV=1	intermediary metabolism and respiration	Rv3566c	P9WJI5	A0A0H3M9E9	31.029	24.4	23.9038	19.5922	22.4893	22.5948	17.2188	18.7664	20.58	18.8385	19.6825	19.6382	18.1487	19.191	4	2	1	2	3	2	1	1	1	1	1	1	1	0	9.1909
HSAA_MYCTU Flavin-dependent monooxygenase, oxygenase subunit HsaA OS=Mycobacterium tuberculosis (strain ATCC 25618 / H37Rv) GN=hsaA PE=1 SV=1;A0A0H3M9F4_MYCBP Possible oxidoreductase OS=Mycobacterium bovis (strain BCG / Pasteur 1173P2) GN=BCG_3635c PE=4 SV	intermediary metabolism and respiration	Rv3570c	P9WJA1	A0A0H3M9F4	43.142	30.5	20.9435	22.0392	21.0987	21.4981	20.0567	21.7753	20.881	21.5622	20.5735	21.4144	22.8416	20.6062	9	5	3	3	4	6	3	3	4	3	4	5	5	0	65.608
P96857_MYCTU LacI family transcriptional regulator OS=Mycobacterium tuberculosis (strain ATCC 25618 / H37Rv) GN=Rv3575c PE=1 SV=4;A0A0H3M9F9_MYCBP Transcriptional regulatory protein (Probably lacI-family) OS=Mycobacterium bovis (strain BCG / Pasteur 1173P2	Regulatory proteins	Rv3575c	P96857	A0A0H3M9F9	38.209	27.6	20.1557	19.5305	20.7496	21.8984	21.3501	22.4926	20.0367	19.5799	20.3808	21.1838	20.9765	19.1602	7	2	1	2	4	4	2	1	1	2	2	4	0	0	26.68
LPQE_MYCTU Putative lipoprotein LpqE OS=Mycobacterium tuberculosis (strain ATCC 25618 / H37Rv) GN=lpqE PE=1 SV=1;A0A0H3M9G4_MYCBP Possible conserved lipoprotein lpqE OS=Mycobacterium bovis (strain BCG / Pasteur 1173P2) GN=lpqE PE=4 SV=1	cell wall and cell processes	Rv3584	P9WK63	A0A0H3M9G4	18.818	53.8	24.996	24.0679	24.1486	25.7904	25.3488	25.9631	24.1579	26.2278	23.94	25.793	24.8998	23.1438	7	7	5	7	4	7	7	3	3	5	2	7	7	0	181.42
A0A0H3M9G6_MYCBP Cyclopropane-fatty-acyl-phospholipid synthase 1 cmaA1 OS=Mycobacterium bovis (strain BCG / Pasteur 1173P2) GN=cmaA1 PE=4 SV=1;CMAS1_MYCTU Cyclopropane mycolic acid synthase 1 OS=Mycobacterium tuberculosis (strain ATCC 25618 / H37Rv) GN=cma	lipid metabolism	Rv3392c	A0A0H3M9G6	P9WPB7	32.434	47.4	20.4024	21.0877	20.5329	21.7879	18.8683	21.4413	20.2784	21.7343	21.154	21.2047	22.0954	20.4141	8	6	4	4	4	1	4	4	4	3	5	7	5	0	38.199
I6XF92_MYCTU Probable alanine rich hydrolase OS=Mycobacterium tuberculosis (strain ATCC 25618 / H37Rv) GN=Rv2765 PE=1 SV=1;A0A0H3M9G8_MYCBP Probable alanine rich hydrolase OS=Mycobacterium bovis (strain BCG / Pasteur 1173P2) GN=BCG_2782 PE=4 SV=1	intermediary metabolism and respiration	Rv2765	I6XF92	A0A0H3M9G8	26.159	75.9	26.2771	25.693	26.4937	25.4874	26.2263	25.9202	25.9086	26.2748	26.2728	26.4972	25.1987	26.0595	13	7	3	6	7	9	9	3	7	3	5	10	6	0	242.14
Y1077_MYCTU Putative cystathionine beta-synthase Rv1077 OS=Mycobacterium tuberculosis (strain ATCC 25618 / H37Rv) GN=cbs PE=1 SV=1;A0A0H3M9G9_MYCBP Probable cystathionine beta-synthase cbs OS=Mycobacterium bovis (strain BCG / Pasteur 1173P2) GN=cbs PE=4 SV	intermediary metabolism and respiration	Rv1077	P9WP51	A0A0H3M9G9	48.635	47.2	22.4478	23.008	22.8057	24.102	22.1406	24.4174	23.3112	23.5105	23.2681	23.6654	24.5588	23.1788	14	9	6	10	5	13	6	4	5	5	4	10	9	0	91.143
O53431_MYCTU Uncharacterized protein OS=Mycobacterium tuberculosis (strain ATCC 25618 / H37Rv) GN=Rv1083 PE=1 SV=1;A0A0H3M9H3_MYCBP Uncharacterized protein OS=Mycobacterium bovis (strain BCG / Pasteur 1173P2) GN=BCG_1141 PE=4 SV=1	Conserved hypotheticals	Rv1083	O53431	A0A0H3M9H3	9.2955	37.5	16.048	18.629	15.595	14.6709	19.8594	14.929	20.6413	18.6103	19.6836	18.3467	14.5312	18.1995	3	1	0	2	3	3	2	0	0	0	0	2	0	0	123.62
MAZE3_MYCTU Antitoxin MazE3 OS=Mycobacterium tuberculosis (strain ATCC 25618 / H37Rv) GN=mazE3 PE=1 SV=1;A0A0H3M9I7_MYCBP Uncharacterized protein OS=Mycobacterium bovis (strain BCG / Pasteur 1173P2) GN=BCG_1163c PE=4 SV=1	virulence, detoxification and adaptation	Rv1103c	O53451	A0A0H3M9I7	11.395	35.8	19.2226	19.7254	21.88	17.2031	20.1946	17.909	20.2314	20.1338	18.3775	19.0297	23.4138	22.2554	2	1	0	2	0	2	0	0	0	0	0	1	2	0	12.597
ESPA_MYCTU ESX-1 secretion-associated protein EspA OS=Mycobacterium tuberculosis (strain ATCC 25618 / H37Rv) GN=espA PE=1 SV=1;A0A0H3M9J0_MYCBP Conserved hypothetical alanine and glycine rich protein OS=Mycobacterium bovis (strain BCG / Pasteur 1173P2) GN=	cell wall and cell processes	Rv3616c	P9WJE1	A0A0H3M9J0	39.888	16.8	20.2573	21.3205	21.6753	21.0909	21.3859	22.8485	20.1858	18.6426	19.9366	18.5909	21.3828	19.6897	4	3	2	3	3	3	3	2	1	2	0	4	3	0	74.15
O06380_MYCTU Conserved protein OS=Mycobacterium tuberculosis (strain ATCC 25618 / H37Rv) GN=Rv3627c PE=1 SV=1;A0A0H3M9J3_MYCBP Uncharacterized protein OS=Mycobacterium bovis (strain BCG / Pasteur 1173P2) GN=BCG_3685c PE=4 SV=1	Conserved hypotheticals	Rv3627c	O06380	A0A0H3M9J3	46.834	36.2	18.3388	19.8996	17.2403	21.5872	21.4331	22.5174	19.6078	22.8382	20.0777	21.8105	22.1045	22.2596	8	0	1	0	3	4	5	2	2	0	3	4	4	0	36.027
PBPA_MYCTU Penicillin-binding protein A OS=Mycobacterium tuberculosis (strain ATCC 25618 / H37Rv) GN=pbpA PE=1 SV=1;A0A0H3M9K0_MYCBP Probable penicillin-binding protein pbpA OS=Mycobacterium bovis (strain BCG / Pasteur 1173P2) GN=pbpA PE=4 SV=1	cell wall and cell processes	Rv0016c	P9WKD1	A0A0H3M9K0	51.575	18.7	18.9131	20.7404	20.2965	21.2715	20.0748	21.6969	18.5776	20.4709	17.7131	21.0356	21.1029	19.7477	4	1	2	2	3	1	2	1	3	1	2	4	2	0	34.985
O06576_MYCTU Probable epoxide hydrolase EphC (Epoxide hydratase) OS=Mycobacterium tuberculosis (strain ATCC 25618 / H37Rv) GN=ephC PE=1 SV=1;A0A0H3M9L2_MYCBP Probable epoxide hydrolase ephC OS=Mycobacterium bovis (strain BCG / Pasteur 1173P2) GN=ephC PE=4	virulence, detoxification and adaptation	Rv1124	O06576	A0A0H3M9L2	34.694	43	23.6414	21.8269	22.9883	23.0243	23.3598	23.5829	23.1908	22.1368	23.3729	22.2391	22.3551	21.7264	8	3	3	4	6	2	6	4	4	4	3	7	3	0	100.19
Y037_MYCTU Uncharacterized MFS-type transporter Rv0037c OS=Mycobacterium tuberculosis (strain ATCC 25618 / H37Rv) GN=Rv0037c PE=1 SV=1;A0A0H3M9L9_MYCBP Probable conserved integral membrane protein OS=Mycobacterium bovis (strain BCG / Pasteur 1173P2) GN=BCG	cell wall and cell processes	Rv0037c	P9WJY1	A0A0H3M9L9	45.866	7.9	20.0888	19.5831	19.0533	18.0552	18.7331	18.5317	19.0457	18.4993	18.9844	17.671	18.4314	19.0757	2	1	0	1	1	0	1	0	0	0	0	0	1	0	3.8737
P71701_MYCTU 5,10-methylene tetrahydromethanopterin reductase OS=Mycobacterium tuberculosis (strain ATCC 25618 / H37Rv) GN=Rv0044c PE=1 SV=1;A0A0H3M9M2_MYCBP Possible oxidoreductase OS=Mycobacterium bovis (strain BCG / Pasteur 1173P2) GN=BCG_0075c PE=4 SV=	intermediary metabolism and respiration	Rv0044c	P71701	A0A0H3M9M2	28.524	29.9	21.9647	21.7593	21.9645	23.9946	21.0597	23.5146	21.1433	23.3155	21.8703	22.447	22.7893	20.896	6	2	3	2	5	3	4	3	4	3	3	4	5	0	16.405
Y1144_MYCTU Uncharacterized oxidoreductase Rv1144 OS=Mycobacterium tuberculosis (strain ATCC 25618 / H37Rv) GN=Rv1144 PE=1 SV=1;A0A0H3M9N1_MYCBP Probable short-chain type dehydrogenase/reductase OS=Mycobacterium bovis (strain BCG / Pasteur 1173P2) GN=BCG_1	intermediary metabolism and respiration	Rv1144	P9WGQ7	A0A0H3M9N1	25.787	61.6	23.5075	25.3393	24.8024	24.3483	22.7069	25.1508	26.0067	24.3045	24.7023	25.2204	25.4417	23.5235	9	5	5	7	5	7	5	3	4	5	5	8	5	0	112.98
P71643_MYCTU Uncharacterized protein OS=Mycobacterium tuberculosis (strain ATCC 25618 / H37Rv) GN=Rv2808 PE=4 SV=4;A0A0H3M9N4_MYCBP Uncharacterized protein OS=Mycobacterium bovis (strain BCG / Pasteur 1173P2) GN=BCG_2826 PE=4 SV=1	Conserved hypotheticals	Rv2808	P71643	A0A0H3M9N4	9.8619	94.1	18.7709	21.581	20.3382	19.0721	19.9266	20.1546	21.6076	19.1576	20.7569	19.5685	22.9325	18.1198	5	1	3	2	0	3	2	2	1	1	1	4	0	0	19.888
Q79G13_MYCTU Glucanase OS=Mycobacterium tuberculosis (strain ATCC 25618 / H37Rv) GN=celA1 PE=1 SV=1;A0A0H3M9N6_MYCBP Glucanase OS=Mycobacterium bovis (strain BCG / Pasteur 1173P2) GN=celA1 PE=3 SV=1	intermediary metabolism and respiration	Rv0062	Q79G13	A0A0H3M9N6	39.973	58.2	21.87	24.979	22.7722	21.6517	24.1253	22.5626	24.8966	23.3403	22.3347	22.6115	22.4663	21.7256	11	5	4	7	4	10	7	5	5	3	4	4	4	0	53.237
NPD_MYCTU NAD-dependent protein deacylase OS=Mycobacterium tuberculosis (strain ATCC 25618 / H37Rv) GN=cobB PE=1 SV=1;A0A0H3M9N7_MYCBP NAD-dependent protein deacylase OS=Mycobacterium bovis (strain BCG / Pasteur 1173P2) GN=cobB PE=3 SV=1	Regulatory proteins	Rv1151c	P9WGG3	A0A0H3M9N7	25.661	30.4	20.6888	19.4898	20.2088	20.106	18.8791	20.0938	18.9478	21.3127	20.1245	21.4663	18.9844	19.1995	5	2	1	2	1	1	5	1	2	2	1	4	1	0	21.036
ACSA_MYCTU Acetyl-coenzyme A synthetase OS=Mycobacterium tuberculosis (strain ATCC 25618 / H37Rv) GN=acsA PE=1 SV=1;A0A0H3M9N8_MYCBP Acetyl-coenzyme A synthetase OS=Mycobacterium bovis (strain BCG / Pasteur 1173P2) GN=acs PE=3 SV=1	lipid metabolism	Rv3667	P9WQD1	A0A0H3M9N8	71.475	20.9	21.9972	22.9698	22.7712	21.9067	16.073	21.4796	22.8597	22.1778	22.0005	22.2146	21.6627	22.1861	8	2	4	5	5	2	5	3	2	3	3	3	3	0	22.159
O06554_MYCTU Conserved protein OS=Mycobacterium tuberculosis (strain ATCC 25618 / H37Rv) GN=Rv1156 PE=1 SV=1;A0A0H3M9P1_MYCBP Uncharacterized protein OS=Mycobacterium bovis (strain BCG / Pasteur 1173P2) GN=BCG_1217 PE=4 SV=1	Conserved hypotheticals	Rv1156	O06554	A0A0H3M9P1	20.872	55.9	23.7909	25.2701	23.9698	23.6938	24.3102	25.7478	24.9683	23.9459	24.5246	24.1734	24.4458	22.1648	8	5	2	5	5	6	5	3	4	3	3	5	6	0	72.015
I6XHX8_MYCTU ADP-ribose pyrophosphatase OS=Mycobacterium tuberculosis (strain ATCC 25618 / H37Rv) GN=Rv3672c PE=1 SV=1;A0A0H3M9P4_MYCBP Uncharacterized protein OS=Mycobacterium bovis (strain BCG / Pasteur 1173P2) GN=BCG_3730c PE=4 SV=1	Conserved hypotheticals	Rv3672c	I6XHX8	A0A0H3M9P4	28.89	46.2	21.5277	21.6243	21.4069	23.1186	22.2443	22.6471	21.9726	22.2538	21.982	18.9142	21.8207	19.845	9	1	1	2	7	5	3	1	4	2	2	3	1	0	24.135
I6XHY3_MYCTU Beta-lactamase OS=Mycobacterium tuberculosis (strain ATCC 25618 / H37Rv) GN=Rv3677c PE=1 SV=1;A0A0H3M9P7_MYCBP Putative hydrolase OS=Mycobacterium bovis (strain BCG / Pasteur 1173P2) GN=BCG_3735c PE=4 SV=1	intermediary metabolism and respiration	Rv3677c	I6XHY3	A0A0H3M9P7	28.49	22.7	24.219	22.5794	24.5613	23.3328	17.9478	24.4669	23.0082	23.2733	24.119	23.0371	22.3873	21.6448	4	2	2	4	3	1	3	2	3	2	2	2	2	0	71.38
LPQW_MYCTU Probable monoacyl phosphatidylinositol tetramannoside-binding protein LpqW OS=Mycobacterium tuberculosis (strain ATCC 25618 / H37Rv) GN=lpqW PE=1 SV=1;A0A0H3M9P8_MYCBP Putative lipoprotein lpqW OS=Mycobacterium bovis (strain BCG / Pasteur 1173P2	cell wall and cell processes	Rv1166	P9WGU7	A0A0H3M9P8	66.129	25.5	20.6997	21.9578	21.0158	21.6686	22.0201	23.5103	19.3037	21.3785	19.0469	22.0164	23.3104	20.4042	15	2	4	4	7	11	6	1	5	1	4	6	3	0	67.618
I6X7H4_MYCTU Ferredoxin OS=Mycobacterium tuberculosis (strain ATCC 25618 / H37Rv) GN=fdxD PE=1 SV=1;A0A0H3M9P9_MYCBP Probable ferredoxin fdxD OS=Mycobacterium bovis (strain BCG / Pasteur 1173P2) GN=fdxD PE=4 SV=1	intermediary metabolism and respiration	Rv3503c	I6X7H4	A0A0H3M9P9	6.9036	74.6	18.3301	19.3163	18.1807	18.4289	20.7767	19.3382	22.1437	19.3474	18.9359	19.3371	22.0118	22.1787	2	0	1	0	1	2	1	2	0	1	0	2	2	0	25.472
O53622_MYCTU Oxidoreductase OS=Mycobacterium tuberculosis (strain ATCC 25618 / H37Rv) GN=Rv0077c PE=1 SV=3;A0A0H3M9Q4_MYCBP Probable oxidoreductase OS=Mycobacterium bovis (strain BCG / Pasteur 1173P2) GN=BCG_0108c PE=4 SV=1	intermediary metabolism and respiration	Rv0077c	O53622	A0A0H3M9Q4	29.686	12	19.6802	18.1068	16.1567	18.1148	18.7531	17.2178	19.1105	16.9243	17.0747	19.6025	16.9564	17.4368	3	1	1	1	2	1	1	0	2	1	0	2	1	0	6.055
O50433_MYCTU Ferredoxin OS=Mycobacterium tuberculosis (strain ATCC 25618 / H37Rv) GN=fdxC PE=1 SV=1;A0A0H3M9R0_MYCBP Probable ferredoxin fdxC OS=Mycobacterium bovis (strain BCG / Pasteur 1173P2) GN=fdxC PE=4 SV=1	intermediary metabolism and respiration	Rv1177	O50433	A0A0H3M9R0	11.839	37	20.2121	18.9565	20.242	18.6181	23.9828	20.1864	20.6225	19.0759	19.6792	18.7699	19.9425	21.2779	3	3	2	2	3	3	3	2	1	2	1	3	2	0	152.64
GLPK_MYCTU Glycerol kinase OS=Mycobacterium tuberculosis (strain ATCC 25618 / H37Rv) GN=glpK PE=1 SV=1;A0A0H3M9R5_MYCBP Glycerol kinase OS=Mycobacterium bovis (strain BCG / Pasteur 1173P2) GN=glpK PE=3 SV=1	intermediary metabolism and respiration	Rv3696c	P9WPK1	A0A0H3M9R5	55.859	35.8	21.4908	21.8922	22.7109	22.3047	20.137	23.2374	22.2232	21.7343	22.3558	22.1038	23.3717	21.5618	12	4	3	7	6	5	5	3	4	4	4	9	5	0	73.339
I6YGD8_MYCTU Acetyl-CoA acetyltransferase OS=Mycobacterium tuberculosis (strain ATCC 25618 / H37Rv) GN=ltp3 PE=1 SV=1;A0A0H3M9S2_MYCBP Probable lipid carrier protein or keto acyl-coa thiolase OS=Mycobacterium bovis (strain BCG / Pasteur 1173P2) GN=BCG_3587	lipid metabolism	Rv3523	I6YGD8	A0A0H3M9S2	41.421	9.6	18.5323	18.6883	17.9488	19.352	17.1738	19.6656	19.3282	18.0122	18.0508	19.6956	18.1435	19.4799	2	1	1	1	2	1	2	1	1	1	1	2	1	0	9.2758
I6YGE4_MYCTU Uncharacterized protein OS=Mycobacterium tuberculosis (strain ATCC 25618 / H37Rv) GN=Rv3528c PE=1 SV=1;A0A0H3M9S7_MYCBP Uncharacterized protein OS=Mycobacterium bovis (strain BCG / Pasteur 1173P2) GN=BCG_3592c PE=4 SV=1	Conserved hypotheticals	Rv3528c	I6YGE4	A0A0H3M9S7	27.44	30.8	17.7255	21.4914	20.7312	22.6002	20.2639	22.5004	22.6498	21.2895	20.5706	22.2839	21.857	21.7157	7	1	3	3	3	5	2	2	2	2	2	3	2	0	20.26
AK_MYCTU Aspartokinase OS=Mycobacterium tuberculosis (strain ATCC 25618 / H37Rv) GN=ask PE=1 SV=1;A0A0H3M9T1_MYCBP Aspartokinase OS=Mycobacterium bovis (strain BCG / Pasteur 1173P2) GN=ask PE=3 SV=1	intermediary metabolism and respiration	Rv3709c	P9WPX3	A0A0H3M9T1	44.461	34	21.705	22.8287	22.356	22.0965	21.9541	22.2025	22.1995	22.1436	21.3979	22.1527	24.2471	22.5423	9	5	2	7	5	6	5	3	4	3	3	7	3	0	44.4
MAP12_MYCTU Methionine aminopeptidase 2 OS=Mycobacterium tuberculosis (strain ATCC 25618 / H37Rv) GN=map PE=1 SV=1;A0A0H3M9T2_MYCBP Methionine aminopeptidase OS=Mycobacterium bovis (strain BCG / Pasteur 1173P2) GN=mapB PE=3 SV=1	intermediary metabolism and respiration	Rv2861c	P9WK19	A0A0H3M9T2	30.891	47	20.4478	19.1699	21.366	21.9753	23.3529	20.1181	20.0719	22.0152	18.352	22.3815	19.5599	20.2973	10	5	2	7	5	8	7	0	5	1	5	4	3	0	67.654
DPO3X_MYCTU DNA polymerase III subunit gamma/tau OS=Mycobacterium tuberculosis (strain ATCC 25618 / H37Rv) GN=dnaX PE=1 SV=1;A0A0H3M9U1_MYCBP DNA polymerase III subunit gamma/tau OS=Mycobacterium bovis (strain BCG / Pasteur 1173P2) GN=dnaZX PE=3 SV=1	information pathways	Rv3721c	P9WNT9	A0A0H3M9U1	61.923	30.6	21.1106	22.1377	21.4913	22.7144	23.1053	22.342	22.839	22.2222	22.2317	21.888	22.1954	20.9177	12	2	4	4	6	7	4	3	3	2	3	4	3	0	80.748
TRES_MYCTU Trehalose synthase/amylase TreS OS=Mycobacterium tuberculosis (strain ATCC 25618 / H37Rv) GN=treS PE=1 SV=1;A0A0H3M9U6_MYCBP Trehalose synthase treS OS=Mycobacterium bovis (strain BCG / Pasteur 1173P2) GN=treS PE=4 SV=1	virulence, detoxification and adaptation	Rv0126	P9WQ19	A0A0H3M9U6	68.592	52.1	24.8594	24.8811	25.9512	24.4029	22.8231	25.7064	24.082	22.9689	25.9934	23.9175	25.4721	22.8445	17	8	6	10	9	9	9	6	6	5	4	11	10	0	137.15
CP125_MYCTU Steroid C26-monooxygenase OS=Mycobacterium tuberculosis (strain ATCC 25618 / H37Rv) GN=cyp125 PE=1 SV=1;A0A0H3M9U7_MYCBP Probable cytochrome P450 125 cyp125 OS=Mycobacterium bovis (strain BCG / Pasteur 1173P2) GN=cyp125 PE=3 SV=1	intermediary metabolism and respiration	Rv3545c	P9WPP1	A0A0H3M9U7	48.432	15.7	21.9681	19.3038	22.106	22.0018	21.4702	22.222	19.6567	19.6006	18.9372	19.254	22.1967	18.697	4	2	0	2	1	2	2	1	0	0	0	3	1	0	50.839
O69693_MYCTU Alcohol dehydrogenase OS=Mycobacterium tuberculosis (strain ATCC 25618 / H37Rv) GN=Rv3726 PE=1 SV=1;A0A0H3M9U8_MYCBP Putative dehydrogenase OS=Mycobacterium bovis (strain BCG / Pasteur 1173P2) GN=BCG_3786 PE=4 SV=1	intermediary metabolism and respiration	Rv3726	O69693	A0A0H3M9U8	42.035	24.7	20.2603	18.0862	18.2072	19.6696	18.5982	21.0829	19.3178	19.493	18.7048	20.3605	21.1234	19.5982	6	2	1	2	3	4	4	0	0	1	0	2	1	0	30.568
AMI3_MYCTU Putative amidase AmiC OS=Mycobacterium tuberculosis (strain ATCC 25618 / H37Rv) GN=amiC PE=1 SV=1;A0A0H3M9V1_MYCBP Probable amidase amic OS=Mycobacterium bovis (strain BCG / Pasteur 1173P2) GN=amiC PE=3 SV=1	intermediary metabolism and respiration	Rv2888c	P9WQ95	A0A0H3M9V1	50.915	32.1	17.9061	22.6241	23.3024	23.497	22.305	23.1597	23.8747	23.1062	24.2447	18.9519	23.5235	21.9558	9	1	4	4	5	4	4	2	4	3	2	7	5	0	65.266
Y2895_MYCTU Uncharacterized protein Rv2895c OS=Mycobacterium tuberculosis (strain ATCC 25618 / H37Rv) GN=Rv2895c PE=1 SV=1;A0A0H3M9V3_MYCBP Possible mycobactin utilization protein viuB OS=Mycobacterium bovis (strain BCG / Pasteur 1173P2) GN=viuB PE=4 SV=1	intermediary metabolism and respiration	Rv2895c	P9WL31	A0A0H3M9V3	30.602	67.1	22.9671	24.2921	24.2973	23.73	24.1583	24.6661	24.4904	22.8393	23.663	23.7405	25.3109	24.3076	12	9	5	9	8	6	6	4	6	5	5	8	6	0	77.533
P96816_MYCTU NAD-dependent dehydratase OS=Mycobacterium tuberculosis (strain ATCC 25618 / H37Rv) GN=Rv0139 PE=1 SV=1;A0A0H3M9V5_MYCBP Putative oxidoreductase OS=Mycobacterium bovis (strain BCG / Pasteur 1173P2) GN=BCG_0175 PE=4 SV=1	intermediary metabolism and respiration	Rv0139	P96816	A0A0H3M9V5	36.976	12.1	18.7162	19.165	18.872	19.8972	18.6355	20.5725	19.4794	19.4863	18.6554	19.2659	19.7394	18.8362	3	2	0	2	2	1	2	0	2	1	2	1	2	0	44.192
I6Y3U6_MYCTU Enoyl-CoA hydratase OS=Mycobacterium tuberculosis (strain ATCC 25618 / H37Rv) GN=echA20 PE=1 SV=1;A0A0H3M9V6_MYCBP Probable enoyl-CoA hydratase echA20 OS=Mycobacterium bovis (strain BCG / Pasteur 1173P2) GN=echA20 PE=4 SV=1	lipid metabolism	Rv3550	I6Y3U6	A0A0H3M9V6	26.333	28.7	20.5077	19.4246	20.8683	21.7114	17.8732	21.9098	19.8447	21.4469	19.1852	19.5037	18.4121	18.8956	4	2	1	2	4	0	2	0	4	1	2	1	0	0	52.049
Y2901_MYCTU Uncharacterized protein Rv2901c OS=Mycobacterium tuberculosis (strain ATCC 25618 / H37Rv) GN=Rv2901c PE=1 SV=1;A0A0H3M9V8_MYCBP Uncharacterized protein OS=Mycobacterium bovis (strain BCG / Pasteur 1173P2) GN=BCG_2922c PE=4 SV=1	Conserved hypotheticals	Rv2901c	P9WL27	A0A0H3M9V8	12.226	71.3	19.388	18.5642	19.2288	20.1304	20.2976	18.3809	19.4215	20.1217	20.1768	19.1953	22.7361	21.0737	6	3	1	4	1	5	1	1	2	1	1	4	6	0	24.098
P96821_MYCTU Probable transcriptional regulatory protein (Possibly TetR-family) OS=Mycobacterium tuberculosis (strain ATCC 25618 / H37Rv) GN=Rv0144 PE=1 SV=2;A0A0H3M9V9_MYCBP Probable transcriptional regulatory protein (Possibly tetR-family) OS=Mycobacteri	Regulatory proteins	Rv0144	P96821	A0A0H3M9V9	30.643	25	24.1793	22.4419	24.2117	23.6517	20.3367	22.0653	21.6128	22.7932	23.0425	22.6339	21.5958	22.2489	5	2	4	5	4	2	3	3	4	2	3	3	4	0	34.15
SUGC_MYCTU Trehalose import ATP-binding protein SugC OS=Mycobacterium tuberculosis (strain ATCC 25618 / H37Rv) GN=sugC PE=1 SV=1;A0A0H3M9W0_MYCBP Probable sugar-transport ATP-binding protein ABC transporter sugC OS=Mycobacterium bovis (strain BCG / Pasteur	cell wall and cell processes	Rv1238	P9WQI3	A0A0H3M9W0	42.915	22.1	17.9161	18.9266	17.6469	20.5566	18.776	20.6671	19.5149	20.1473	18.9407	20.5506	20.851	20.1672	7	1	1	0	4	5	2	1	4	0	2	3	3	0	13.208
I6Y204_MYCTU D-alanyl-D-alanine carboxypeptidase OS=Mycobacterium tuberculosis (strain ATCC 25618 / H37Rv) GN=dacB2 PE=1 SV=1;A0A0H3M9W3_MYCBP Probable D-alanyl-D-alanine carboxypeptidase dacB2 OS=Mycobacterium bovis (strain BCG / Pasteur 1173P2) GN=dacB2	cell wall and cell processes	Rv2911	I6Y204	A0A0H3M9W3	29.746	36.8	18.6845	20.8584	19.3237	19.8394	22.3346	22.0724	18.5577	19.2868	20.6683	21.5307	18.2738	18.8745	6	2	1	3	5	3	3	0	2	1	1	1	0	0	49.077
Y2917_MYCTU Uncharacterized protein Rv2917 OS=Mycobacterium tuberculosis (strain ATCC 25618 / H37Rv) GN=Rv2917 PE=3 SV=1;A0A0H3M9W9_MYCBP Conserved hypothetical alanine and arginine rich protein OS=Mycobacterium bovis (strain BCG / Pasteur 1173P2) GN=BCG_2	Conserved hypotheticals	Rv2917	P9WL21	A0A0H3M9W9	65.824	11.6	23.2663	19.4194	22.2948	23.2833	18.5441	21.5129	20.1727	22.1283	19.4339	19.7323	20.6232	19.4329	4	3	2	3	4	0	2	1	2	1	1	1	0	0	14.942
SMC_MYCTU Chromosome partition protein Smc OS=Mycobacterium tuberculosis (strain ATCC 25618 / H37Rv) GN=smc PE=1 SV=1;A0A0H3M9X3_MYCBP Chromosome partition protein Smc OS=Mycobacterium bovis (strain BCG / Pasteur 1173P2) GN=smc PE=3 SV=1	cell wall and cell processes	Rv2922c	P9WGF3	A0A0H3M9X3	130.64	17.1	22.5521	21.9025	21.8453	22.3472	21.0352	21.56	19.3436	21.9226	19.8067	21.5079	22.5613	18.4822	15	3	4	4	4	10	3	0	3	1	3	9	2	0	104.26
O07406_MYCTU Oxidoreductase OS=Mycobacterium tuberculosis (strain ATCC 25618 / H37Rv) GN=Rv0161 PE=1 SV=2;A0A0H3M9X4_MYCBP Putative oxidoreductase OS=Mycobacterium bovis (strain BCG / Pasteur 1173P2) GN=BCG_0197 PE=4 SV=1	intermediary metabolism and respiration	Rv0161	O07406	A0A0H3M9X4	47.355	28.7	22.6087	22.9151	23.5945	23.2795	21.4718	24.153	22.3709	22.5361	22.7272	22.6867	23.0952	20.9891	7	3	4	6	4	3	6	3	2	4	3	2	4	0	75.691
TESA_MYCTU Probable thioesterase TesA OS=Mycobacterium tuberculosis (strain ATCC 25618 / H37Rv) GN=tesA PE=1 SV=1;A0A0H3M9X8_MYCBP Probable thioesterase tesA OS=Mycobacterium bovis (strain BCG / Pasteur 1173P2) GN=tesA PE=4 SV=1	lipid metabolism	Rv2928	P9WQD5	A0A0H3M9X8	29.151	69.7	22.6826	23.9487	22.4096	24.9705	23.7347	24.5694	25.2864	23.9338	24.2227	24.0508	24.0468	23.6493	14	9	7	11	9	11	8	6	8	6	6	9	7	0	68.394
FQR61_MYCTU F420H(2)-dependent quinone reductase Rv1261c OS=Mycobacterium tuberculosis (strain ATCC 25618 / H37Rv) GN=Rv1261c PE=1 SV=1;A0A0H3M9Y0_MYCBP Uncharacterized protein OS=Mycobacterium bovis (strain BCG / Pasteur 1173P2) GN=BCG_1320c PE=4 SV=1	Conserved hypotheticals	Rv1261c	P9WP13	A0A0H3M9Y0	16.756	53.7	18.7861	19.7208	17.2182	21.8825	19.288	19.9654	20.3981	21.2811	19.6153	21.8718	19.7394	19.9261	8	3	4	4	6	7	5	3	5	3	4	7	3	0	31.279
O07415_MYCTU Mammalian cell entry protein OS=Mycobacterium tuberculosis (strain ATCC 25618 / H37Rv) GN=mce1C PE=1 SV=1;A0A0H3M9Y2_MYCBP MCE-family protein mce1C OS=Mycobacterium bovis (strain BCG / Pasteur 1173P2) GN=mce1C PE=4 SV=1	virulence, detoxification and adaptation	Rv0171	O07415	A0A0H3M9Y2	53.817	50.1	26.331	23.9876	23.9109	24.4018	24.2332	24.9484	23.965	23.7933	24.6107	25.4187	24.2233	22.5914	17	7	7	12	8	12	9	6	5	8	5	7	7	0	137.95
PPSC_MYCTU Phthiocerol synthesis polyketide synthase type I PpsC OS=Mycobacterium tuberculosis (strain ATCC 25618 / H37Rv) GN=ppsC PE=1 SV=2;A0A0H3M9Y4_MYCBP Phenolpthiocerol synthesis type-I polyketide synthase ppsC OS=Mycobacterium bovis (strain BCG / Pa	lipid metabolism	Rv2933	P96202	A0A0H3M9Y4	230.62	24.6	23.5128	24.7312	24.1445	25.4797	20.8646	25.1161	22.9374	24.1428	24.0669	22.2951	23.3312	22.5336	27	6	10	7	16	11	10	5	12	4	5	12	7	0	166.78
CARD_MYCTU RNA polymerase-binding transcription factor CarD OS=Mycobacterium tuberculosis (strain ATCC 25618 / H37Rv) GN=carD PE=1 SV=1;A0A0H3M9Y6_MYCBP Putative transcription factor OS=Mycobacterium bovis (strain BCG / Pasteur 1173P2) GN=BCG_3648c PE=4 SV	Regulatory proteins	Rv3583c	P9WJG3	A0A0H3M9Y6	17.907	51.9	22.2982	20.5545	21.7272	20.0262	24.4337	20.8237	20.6312	19.8214	20.2519	18.6066	22.4444	22.2968	6	5	3	5	4	5	5	3	4	2	2	6	5	0	137.71
A0A0H3M9Y7_MYCBP Probable conserved mce associated transmembrane protein OS=Mycobacterium bovis (strain BCG / Pasteur 1173P2) GN=BCG_0213 PE=4 SV=1;O07420_MYCTU Membrane protein OS=Mycobacterium tuberculosis (strain ATCC 25618 / H37Rv) GN=Rv0176 PE=1 SV=1	cell wall and cell processes	Rv0176	A0A0H3M9Y7	O07420	35.353	17.4	17.6204	18.9858	19.1313	21.2094	19.2076	18.7891	18.7532	18.916	18.3819	20.5561	18.9077	18.0693	5	1	1	1	3	4	3	0	1	1	0	2	2	0	10.372
LPQH_MYCTU Lipoprotein LpqH OS=Mycobacterium tuberculosis (strain ATCC 25618 / H37Rv) GN=lpqH PE=1 SV=1;LPQH_MYCBP Lipoprotein LpqH OS=Mycobacterium bovis (strain BCG / Pasteur 1173P2) GN=lpqH PE=3 SV=1	cell wall and cell processes	Rv3763	P9WK61	A0A0H3M9Z0	15.147	60.4	19.0234	19.8671	20.0693	20.1829	23.996	22.3269	21.5012	19.4358	19.2211	20.2522	22.0347	22.3458	4	2	2	3	3	4	3	2	3	2	1	2	3	0	26.486
A0A0H3M9Z4_MYCBP Uncharacterized protein OS=Mycobacterium bovis (strain BCG / Pasteur 1173P2) GN=BCG_1335c PE=4 SV=1;Y1276_MYCTU Uncharacterized protein Rv1276c OS=Mycobacterium tuberculosis (strain ATCC 25618 / H37Rv) GN=Rv1276c PE=1 SV=1	Conserved hypotheticals	Rv1276c	A0A0H3M9Z4	P9WGF9	16.447	77.8	24.0433	23.8034	25.3333	23.8473	23.7642	25.2527	24.0799	22.5284	24.2599	24.2734	24.2204	23.7454	7	3	3	4	3	5	4	2	3	1	3	4	2	0	61.133
A0A0H3M9Z8_MYCBP Probable fatty-acid-CoA ligase fadD29 OS=Mycobacterium bovis (strain BCG / Pasteur 1173P2) GN=fadD29 PE=4 SV=1;FAA29_MYCTU Long-chain-fatty-acid--AMP ligase FadD29 OS=Mycobacterium tuberculosis (strain ATCC 25618 / H37Rv) GN=fadD29 PE=1 SV	lipid metabolism	Rv2950c	A0A0H3M9Z8	P95141	67.476	33	20.8679	22.7474	22.2268	24.2538	21.5714	22.5988	22.9112	23.4512	22.5246	21.9916	22.9858	21.9128	13	3	4	8	7	4	6	2	5	2	5	8	5	0	97.825
A0A0H3M9Z9_MYCBP Probable conserved transmembrane protein rich in alanine and arginine and proline OS=Mycobacterium bovis (strain BCG / Pasteur 1173P2) GN=BCG_3668c PE=4 SV=1;O06278_MYCTU Membrane protein OS=Mycobacterium tuberculosis (strain ATCC 25618 /	cell wall and cell processes	Rv3604c	A0A0H3M9Z9	O06278	43.016	55.7	19.4654	19.9458	19.4922	18.8212	20.5571	19.671	19.996	19.899	19.8192	19.6935	21.9849	19.6997	13	1	1	5	1	9	2	1	0	1	0	6	3	0	83.582
Y1281_MYCTU Uncharacterized ABC transporter ATP-binding protein Rv1281c OS=Mycobacterium tuberculosis (strain ATCC 25618 / H37Rv) GN=Rv1281c PE=1 SV=1;A0A0H3MA00_MYCBP Probable oligopeptide-transport ATP-binding protein ABC transporter oppD OS=Mycobacteriu	cell wall and cell processes	Rv1281c	P9WQJ5	A0A0H3MA00	65.292	17.6	17.6365	18.8983	22.2209	21.1862	19.6182	22.564	19.899	19.9794	18.6251	19.3129	19.2749	19.5833	5	0	2	2	4	3	3	1	0	1	0	2	2	0	34.119
FTSH_MYCTU ATP-dependent zinc metalloprotease FtsH OS=Mycobacterium tuberculosis (strain ATCC 25618 / H37Rv) GN=ftsH PE=1 SV=1;A0A0H3MA04_MYCBP ATP-dependent zinc metalloprotease FtsH OS=Mycobacterium bovis (strain BCG / Pasteur 1173P2) GN=ftsH PE=3 SV=1	cell wall and cell processes	Rv3610c	P9WQN3	A0A0H3MA04	81.985	34.6	22.7023	23.269	22.192	22.7208	21.8708	23.4774	24.011	23.0113	19.0508	22.8746	23.1887	22.4027	16	2	4	3	5	11	5	2	3	1	3	8	6	0	119.19
Y1287_MYCTU Putative HTH-type transcriptional regulator Rv1287 OS=Mycobacterium tuberculosis (strain ATCC 25618 / H37Rv) GN=Rv1287 PE=1 SV=1;A0A0H3MA07_MYCBP Uncharacterized protein OS=Mycobacterium bovis (strain BCG / Pasteur 1173P2) GN=BCG_1346 PE=4 SV=1	Conserved hypotheticals	Rv1287	P9WME3	A0A0H3MA07	17.209	36	17.6034	22.1546	22.1297	19.3685	22.3763	17.841	19.1914	18.1283	20.4661	20.1951	24.3253	22.6525	4	1	2	2	0	4	0	1	0	1	0	2	2	0	70.569
ESPC_MYCTU ESX-1 secretion-associated protein EspC OS=Mycobacterium tuberculosis (strain ATCC 25618 / H37Rv) GN=espC PE=1 SV=1;A0A0H3MA09_MYCBP Uncharacterized protein OS=Mycobacterium bovis (strain BCG / Pasteur 1173P2) GN=BCG_3679c PE=4 SV=1	cell wall and cell processes	Rv3615c	P9WJD7	A0A0H3MA09	10.795	19.4	15.077	13.6094	15.1044	13.8389	22.729	14.6648	19.1397	18.8393	18.8747	19.8199	13.497	18.5607	2	2	2	2	2	2	2	0	0	1	0	2	1	0	22.376
MMPLB_MYCTU Heme uptake protein MmpL11 OS=Mycobacterium tuberculosis (strain ATCC 25618 / H37Rv) GN=mmpL11 PE=1 SV=1;A0A0H3MA10_MYCBP Probable conserved transmembrane transport protein mmpL11 OS=Mycobacterium bovis (strain BCG / Pasteur 1173P2) GN=mmpL11 P	cell wall and cell processes	Rv0202c	P9WJT9	A0A0H3MA10	103.5	8.6	17.5399	20.3108	18.7335	19.3119	18.4649	17.7755	18.4968	17.9004	20.6866	19.9113	17.8175	18.999	7	1	1	2	5	2	4	0	2	0	0	3	0	0	5.6367
GLFT1_MYCTU Galactofuranosyltransferase GlfT1 OS=Mycobacterium tuberculosis (strain ATCC 25618 / H37Rv) GN=glfT1 PE=1 SV=1;A0A0H3MA12_MYCBP Possible L-rhamnosyltransferase OS=Mycobacterium bovis (strain BCG / Pasteur 1173P2) GN=BCG_3844 PE=4 SV=1	cell wall and cell processes	Rv3782	P9WMX3	A0A0H3MA12	33.864	31.2	23.9368	21.7209	23.8984	22.573	18.4092	22.6249	21.8696	21.9623	23.7281	20.2979	20.842	22.018	6	4	2	4	5	1	3	2	3	3	1	4	2	0	33.915
P96389_MYCTU Uncharacterized protein OS=Mycobacterium tuberculosis (strain ATCC 25618 / H37Rv) GN=Rv0207c PE=1 SV=3;A0A0H3MA14_MYCBP Uncharacterized protein OS=Mycobacterium bovis (strain BCG / Pasteur 1173P2) GN=BCG_0244c PE=4 SV=1	Conserved hypotheticals	Rv0207c	P96389	A0A0H3MA14	26.175	62.4	27.8197	25.8574	26.6232	25.5275	23.2471	26.6736	26.361	25.5882	26.6384	25.558	25.0506	22.7806	10	2	5	3	5	8	5	4	5	5	4	6	4	0	138.5
RHO_MYCTU Transcription termination factor Rho OS=Mycobacterium tuberculosis (strain ATCC 25618 / H37Rv) GN=rho PE=1 SV=1;A0A0H3MA15_MYCBP Transcription termination factor Rho OS=Mycobacterium bovis (strain BCG / Pasteur 1173P2) GN=rho PE=3 SV=1	information pathways	Rv1297	P9WHF3	A0A0H3MA15	65.133	56.1	27.75	26.9044	26.924	27.7634	26.1692	27.2897	27.9554	27.7405	27.1435	27.2451	28.493	25.4516	26	15	8	16	10	22	14	8	12	11	8	21	15	0	306.77
O06381_MYCTU Hydrolase OS=Mycobacterium tuberculosis (strain ATCC 25618 / H37Rv) GN=Rv3626c PE=1 SV=3;A0A0H3MA16_MYCBP Uncharacterized protein OS=Mycobacterium bovis (strain BCG / Pasteur 1173P2) GN=BCG_3684c PE=4 SV=1	Conserved hypotheticals	Rv3626c	O06381	A0A0H3MA16	38.439	24	22.3319	18.7691	22.3741	21.6968	18.6169	20.7878	18.9229	18.4618	21.6496	18.8521	17.7201	19.0245	4	2	1	2	2	2	2	1	1	2	1	2	1	0	10.233
Y3788_MYCTU Uncharacterized protein Rv3788 OS=Mycobacterium tuberculosis (strain ATCC 25618 / H37Rv) GN=Rv3788 PE=1 SV=1;A0A0H3MA17_MYCBP Uncharacterized protein OS=Mycobacterium bovis (strain BCG / Pasteur 1173P2) GN=BCG_3850 PE=4 SV=1	Conserved hypotheticals	Rv3788	P9WKW7	A0A0H3MA17	17.406	73.3	23.8388	23.9695	24.052	22.7166	25.284	25.0282	23.1137	22.9596	23.198	24.8783	24.8451	23.4957	7	5	4	7	4	6	5	5	2	4	1	5	5	0	75.017
P96396_MYCTU Probable fatty-acid-CoA ligase FadD4 (Fatty-acid-CoA synthetase) (Fatty-acid-CoA synthase) OS=Mycobacterium tuberculosis (strain ATCC 25618 / H37Rv) GN=fadD4 PE=1 SV=1;A0A0H3MA19_MYCBP Probable fatty-acid-CoA ligase fadD4 OS=Mycobacterium bovi	lipid metabolism	Rv0214	P96396	A0A0H3MA19	58.888	22.2	18.5923	19.5355	20.6266	20.2642	17.6378	21.318	19.7297	18.8849	19.2793	18.6266	18.2589	19.5274	7	1	2	3	3	3	3	1	1	0	1	2	3	0	26.288
O06376_MYCTU Possible transferase (Possibly glycosyltransferase) OS=Mycobacterium tuberculosis (strain ATCC 25618 / H37Rv) GN=Rv3631 PE=1 SV=1;A0A0H3MA20_MYCBP Putative transferase (Possibly glycosyltransferase) OS=Mycobacterium bovis (strain BCG / Pasteur	intermediary metabolism and respiration	Rv3631	O06376	A0A0H3MA20	26.213	37.3	23.9755	22.0093	23.5532	21.9685	17.693	22.559	22.3438	22.3625	23.6707	22.2645	21.2319	20.9855	5	2	1	2	3	1	1	1	2	2	1	2	3	0	34.928
ATP6_MYCTU ATP synthase subunit a OS=Mycobacterium tuberculosis (strain ATCC 25618 / H37Rv) GN=atpB PE=1 SV=1;A0A0H3MA21_MYCBP ATP synthase subunit a OS=Mycobacterium bovis (strain BCG / Pasteur 1173P2) GN=atpB PE=3 SV=1	intermediary metabolism and respiration	Rv1304	P9WPV7	A0A0H3MA21	27.466	12	21.5245	19.8691	21.0972	21.9046	17.9213	21.1916	19.7438	17.8315	17.762	21.1645	19.494	21.4122	2	2	1	2	2	1	1	0	1	0	2	1	1	0	7.2386
EMBC_MYCTU Probable arabinosyltransferase C OS=Mycobacterium tuberculosis (strain ATCC 25618 / H37Rv) GN=embC PE=1 SV=1;A0A0H3MA24_MYCBP Integral membrane indolylacetylinositol arabinosyltransferase embC OS=Mycobacterium bovis (strain BCG / Pasteur 1173P2)	cell wall and cell processes	Rv3793	P9WNL5	A0A0H3MA24	117.49	11.2	18.0693	20.0099	18.7664	19.348	18.7441	20.0962	20.2905	19.1611	18.361	19.5665	21.534	20.0099	6	0	1	1	2	3	0	0	0	0	0	3	2	0	18.357
MURA_MYCTU UDP-N-acetylglucosamine 1-carboxyvinyltransferase OS=Mycobacterium tuberculosis (strain ATCC 25618 / H37Rv) GN=murA PE=1 SV=1;A0A0H3MA26_MYCBP UDP-N-acetylglucosamine 1-carboxyvinyltransferase OS=Mycobacterium bovis (strain BCG / Pasteur 1173P2)	cell wall and cell processes	Rv1315	P9WJM1	A0A0H3MA26	44.063	26.1	18.2615	21.6748	22.4383	21.1046	18.7432	22.1314	22.7629	18.365	22.5113	18.3697	21.5089	19.9574	5	0	2	4	3	1	3	3	2	2	1	2	1	0	23.813
A0A0H3MA31_MYCBP Probable acetolactate synthase (Small subunit) ilvN OS=Mycobacterium bovis (strain BCG / Pasteur 1173P2) GN=ilvN PE=4 SV=1;ILVH_MYCTU Putative acetolactate synthase small subunit OS=Mycobacterium tuberculosis (strain ATCC 25618 / H37Rv) GN	intermediary metabolism and respiration	Rv3002c	A0A0H3MA31	P9WKJ3	18.199	58.9	20.3674	19.9496	20.0253	19.4598	20.7997	20.2564	19.4381	19.5837	18.974	19.3522	21.9322	20.2728	9	5	2	5	5	7	3	2	3	2	3	6	4	0	56.362
MPT51_MYCTU MPT51/MPB51 antigen OS=Mycobacterium tuberculosis (strain ATCC 25618 / H37Rv) GN=mpt51 PE=1 SV=1;A0A0H3MA34_MYCBP Secreted MPT51/MPB51 antigen protein fbpD OS=Mycobacterium bovis (strain BCG / Pasteur 1173P2) GN=fbpD PE=4 SV=1	lipid metabolism	Rv3803c	P9WQN7	A0A0H3MA34	31.089	70.6	26.7087	26.4273	25.5156	27.1598	21.2025	28.3233	26.5331	26.5153	26.6714	27.3364	25.8516	24.2283	8	6	6	7	5	4	6	7	7	5	6	7	7	0	134.59
Y236A_MYCTU Putative secreted protein Rv0236.1 OS=Mycobacterium tuberculosis (strain ATCC 25618 / H37Rv) GN=Rv0236.1 PE=1 SV=1;A0A0H3MA35_MYCBP Small secreted protein OS=Mycobacterium bovis (strain BCG / Pasteur 1173P2) GN=BCG_0274c PE=4 SV=1	cell wall and cell processes	Rv0236A	P9WLB1	A0A0H3MA35	5.8337	28.1	16.6576	18.9289	16.4886	17.0738	19.7622	18.4892	19.385	17.0527	19.0891	16.859	15.4249	18.2416	1	1	0	1	1	1	0	0	1	0	1	1	0	0	3.5827
A0A0H3MA36_MYCBP DNA topoisomerase 1 OS=Mycobacterium bovis (strain BCG / Pasteur 1173P2) GN=topA PE=3 SV=1;TOP1_MYCTU DNA topoisomerase 1 OS=Mycobacterium tuberculosis (strain ATCC 25618 / H37Rv) GN=topA PE=1 SV=1	information pathways	Rv3646c	A0A0H3MA36	P9WG49	102.37	50	24.3397	24.174	23.6032	24.4849	23.4969	24.2395	24.1781	23.4477	24.2279	23.2615	24.1129	23.3893	34	10	9	13	11	28	11	6	9	8	6	17	16	0	164.44
Y1324_MYCTU Uncharacterized protein Rv1324 OS=Mycobacterium tuberculosis (strain ATCC 25618 / H37Rv) GN=Rv1324 PE=1 SV=1;A0A0H3MA37_MYCBP Possible thioredoxin OS=Mycobacterium bovis (strain BCG / Pasteur 1173P2) GN=BCG_1386 PE=4 SV=1	intermediary metabolism and respiration	Rv1324	P9WG61	A0A0H3MA37	32.17	71.1	24.7362	27.0128	25.2366	23.4142	25.388	25.8785	28.0446	24.2129	25.9748	25.423	27.444	25.383	13	10	8	10	10	12	11	7	10	8	8	10	12	0	199.5
O53664_MYCTU Dehydratase OS=Mycobacterium tuberculosis (strain ATCC 25618 / H37Rv) GN=htdX PE=1 SV=1;A0A0H3MA39_MYCBP Uncharacterized protein OS=Mycobacterium bovis (strain BCG / Pasteur 1173P2) GN=BCG_0279c PE=4 SV=1	intermediary metabolism and respiration	Rv0241c	O53664	A0A0H3MA39	30.195	36.8	24.317	22.7297	25.017	23.7023	24.0862	21.5054	21.708	19.309	24.1253	18.4708	21.4644	24.8094	7	2	1	4	5	4	2	1	3	3	2	2	2	0	36.036
GLF_MYCTU UDP-galactopyranose mutase OS=Mycobacterium tuberculosis (strain ATCC 25618 / H37Rv) GN=glf PE=1 SV=1;A0A0H3MA40_MYCBP UDP-galactopyranose mutase glf OS=Mycobacterium bovis (strain BCG / Pasteur 1173P2) GN=glf PE=4 SV=1	cell wall and cell processes	Rv3809c	P9WIQ1	A0A0H3MA40	45.814	24.6	20.558	21.4669	21.9011	23.8415	21.4213	21.7311	22.1856	23.9434	21.9804	22.9627	20.8017	23.9852	7	4	3	5	5	4	4	2	2	4	3	6	5	0	28.288
I6YCP0_MYCTU Uncharacterized protein OS=Mycobacterium tuberculosis (strain ATCC 25618 / H37Rv) GN=Rv3651 PE=1 SV=1;A0A0H3MA44_MYCBP Uncharacterized protein OS=Mycobacterium bovis (strain BCG / Pasteur 1173P2) GN=BCG_3709 PE=4 SV=1	Conserved hypotheticals	Rv3651	I6YCP0	A0A0H3MA44	37.967	70.7	22.1219	23.0106	21.6007	24.517	22.6392	24.8255	22.1839	24.9306	21.9798	24.414	24.368	22.0042	17	10	7	12	7	14	9	5	4	7	5	11	7	0	242.11
O53673_MYCTU Heat shock protein Hsp (Heat-stress-induced ribosome-binding protein A) OS=Mycobacterium tuberculosis (strain ATCC 25618 / H37Rv) GN=hsp PE=1 SV=1;A0A0H3MA45_MYCBP Heat shock protein hsp OS=Mycobacterium bovis (strain BCG / Pasteur 1173P2) GN=	virulence, detoxification and adaptation	Rv0251c	O53673	A0A0H3MA45	17.786	67.3	18.3496	24.3363	18.0699	21.3705	21.4693	18.7272	23.9015	24.2997	23.2236	23.907	25.9311	23.609	9	1	2	0	4	4	2	3	6	4	5	7	4	0	31.092
O07804_MYCTU Uncharacterized protein OS=Mycobacterium tuberculosis (strain ATCC 25618 / H37Rv) GN=Rv3819 PE=1 SV=1;A0A0H3MA52_MYCBP Uncharacterized protein OS=Mycobacterium bovis (strain BCG / Pasteur 1173P2) GN=BCG_3881 PE=4 SV=1	Conserved hypotheticals	Rv3819	O07804	A0A0H3MA52	12.825	76.6	25.3425	24.4558	25.6775	25.6796	18.0898	24.5115	25.1793	24.5097	25.9032	24.3789	24.0101	22.1158	8	3	4	3	5	3	7	4	4	5	4	6	3	0	47.2
Y3661_MYCTU Probable phosphatase Rv3661 OS=Mycobacterium tuberculosis (strain ATCC 25618 / H37Rv) GN=Rv3661 PE=1 SV=1;A0A0H3MA54_MYCBP Uncharacterized protein OS=Mycobacterium bovis (strain BCG / Pasteur 1173P2) GN=BCG_3719 PE=4 SV=1	virulence, detoxification and adaptation	Rv3661	P9WGJ1	A0A0H3MA54	30.711	23	22.5242	23.0477	22.8348	24.4378	20.0975	22.8505	22.3803	24.427	22.6259	22.753	22.668	19.0778	4	4	4	4	4	2	4	2	4	4	4	3	2	0	27.688
AAC2_MYCTU Aminoglycoside 2-N-acetyltransferase OS=Mycobacterium tuberculosis (strain ATCC 25618 / H37Rv) GN=aac PE=1 SV=1;A0A0H3MA55_MYCBP Aminoglycoside 2-n-acetyltransferase aac OS=Mycobacterium bovis (strain BCG / Pasteur 1173P2) GN=aac PE=4 SV=1	virulence, detoxification and adaptation	Rv0262c	P9WQG9	A0A0H3MA55	20.037	24.3	20.7551	20.4065	20.8398	21.0049	17.5974	20.5223	19.5307	19.9909	20.788	19.7871	19.4203	18.4791	3	1	1	1	2	2	1	0	1	1	1	1	0	0	18.288
A0A0H3MA61_MYCBP Putative membrane-associated serine protease OS=Mycobacterium bovis (strain BCG / Pasteur 1173P2) GN=BCG_3729c PE=4 SV=1;Y3671_MYCTU Serine protease Rv3671c OS=Mycobacterium tuberculosis (strain ATCC 25618 / H37Rv) GN=Rv3671c PE=1 SV=1	intermediary metabolism and respiration	Rv3671c	A0A0H3MA61	P9WHR9	40.66	27	19.6571	20.8602	20.4903	19.2701	21.2734	21.1392	18.9352	19.4649	19.0984	19.3613	21.1245	21.1857	6	0	1	3	1	6	3	1	1	1	1	4	4	0	49.334
I6YF08_MYCTU Probable conserved secreted protein TB22.2 OS=Mycobacterium tuberculosis (strain ATCC 25618 / H37Rv) GN=TB22.2 PE=1 SV=1;A0A0H3MA65_MYCBP Probable conserved secreted protein TB22.2 OS=Mycobacterium bovis (strain BCG / Pasteur 1173P2) GN=TB22.2	cell wall and cell processes	Rv3036c	I6YF08	A0A0H3MA65	24.406	48.5	23.917	23.3224	22.6089	23.6114	21.6587	25.4617	22.786	23.8622	22.525	24.2922	24.5542	21.2277	5	2	3	2	3	5	4	3	2	3	3	3	1	0	36.064
Y1363_MYCTU Uncharacterized protein Rv1363c OS=Mycobacterium tuberculosis (strain ATCC 25618 / H37Rv) GN=Rv1363c PE=1 SV=1;A0A0H3MA68_MYCBP Possible membrane protein OS=Mycobacterium bovis (strain BCG / Pasteur 1173P2) GN=BCG_1425c PE=4 SV=1	cell wall and cell processes	Rv1363c	P9WLZ9	A0A0H3MA68	28.308	27.2	19.5163	20.1686	18.9087	19.0108	22.1487	18.7942	18.6218	17.8632	19.9611	19.4416	21.2365	18.9359	4	1	1	2	1	4	2	0	2	0	0	3	2	0	21.75
LPRF_MYCTU Putative diacylated glycolipid transporter LprF OS=Mycobacterium tuberculosis (strain ATCC 25618 / H37Rv) GN=lprF PE=1 SV=1;A0A0H3MA70_MYCBP Putative lipoprotein lprF OS=Mycobacterium bovis (strain BCG / Pasteur 1173P2) GN=lprF PE=4 SV=1	cell wall and cell processes	Rv1368	P9WK47	A0A0H3MA70	26.851	66.7	23.8875	24.0387	23.3194	24.2816	22.4075	24.2393	23.978	25.0886	23.3206	23.7591	23.3995	23.0988	10	4	3	7	3	8	5	2	2	2	2	4	4	0	94.031
P96221_MYCTU Uncharacterized protein OS=Mycobacterium tuberculosis (strain ATCC 25618 / H37Rv) GN=Rv3856c PE=1 SV=1;A0A0H3MA73_MYCBP Uncharacterized protein OS=Mycobacterium bovis (strain BCG / Pasteur 1173P2) GN=BCG_3919c PE=4 SV=1	Conserved hypotheticals	Rv3856c	P96221	A0A0H3MA73	36.701	18.2	21.4427	20.4345	19.8697	21.0501	20.6961	22.2743	19.5573	21.2464	19.8881	21.4202	20.7179	17.9369	5	2	1	2	2	4	2	1	2	1	1	2	1	0	27.635
P71658_MYCTU Putative integration host factor MihF OS=Mycobacterium tuberculosis (strain ATCC 25618 / H37Rv) GN=mihF PE=1 SV=1;A0A0H3MA76_MYCBP Putative integration host factor mihF OS=Mycobacterium bovis (strain BCG / Pasteur 1173P2) GN=mihF PE=4 SV=1	information pathways	Rv1388	P71658	A0A0H3MA76	20.835	32.1	24.5479	24.3907	24.5209	24.2676	28.3869	24.5568	24.6278	23.4524	24.6581	23.2644	25.3799	26.1376	8	5	4	6	5	7	7	4	5	3	5	6	6	0	106.55
ESPG1_MYCTU ESX-1 secretion-associated protein EspG1 OS=Mycobacterium tuberculosis (strain ATCC 25618 / H37Rv) GN=espG1 PE=1 SV=2;A0A0H3MA77_MYCBP Uncharacterized protein OS=Mycobacterium bovis (strain BCG / Pasteur 1173P2) GN=BCG_3929 PE=4 SV=1	cell wall and cell processes	Rv3866	P96210	A0A0H3MA77	30.064	31.1	23.9898	23.478	23.4284	24.1033	18.8673	23.9103	24.1241	23.6895	23.3295	23.5795	22.5919	18.8217	5	2	3	4	4	2	4	4	4	4	4	4	1	0	62.645
A0A0H3MA79_MYCBP Probable transcriptional regulatory protein (Probably crp/fnr-family) OS=Mycobacterium bovis (strain BCG / Pasteur 1173P2) GN=BCG_3734 PE=4 SV=1;CRPL_MYCTU CRP-like cAMP-activated global transcriptional regulator OS=Mycobacterium tuberculo	Regulatory proteins	Rv3676	A0A0H3MA79	P9WMH3	24.774	70.5	24.372	24.4543	24.3294	22.7751	25.1553	24.6746	24.2935	23.3306	23.8821	23.2493	26.4456	24.9187	12	9	8	10	7	11	10	6	7	7	6	11	8	0	105.3
P71668_MYCTU Lipase OS=Mycobacterium tuberculosis (strain ATCC 25618 / H37Rv) GN=lipI PE=1 SV=1;A0A0H3MA81_MYCBP Probable lipase lipH OS=Mycobacterium bovis (strain BCG / Pasteur 1173P2) GN=lipI PE=4 SV=1	intermediary metabolism and respiration	Rv1400c	P71668	A0A0H3MA81	34.052	53.8	18.271	19.1596	23.4661	22.783	22.2162	24.328	19.9106	21.9894	22.681	22.2097	23.4966	22.9862	9	1	0	5	1	7	1	2	1	1	1	7	7	0	74.336
SERB2_MYCTU Phosphoserine phosphatase SerB2 OS=Mycobacterium tuberculosis (strain ATCC 25618 / H37Rv) GN=serB2 PE=1 SV=1;A0A0H3MA82_MYCBP Probable phosphoserine phosphatase serB2 OS=Mycobacterium bovis (strain BCG / Pasteur 1173P2) GN=serB2 PE=4 SV=1	intermediary metabolism and respiration	Rv3042c	O53289	A0A0H3MA82	43.058	22.7	24.5215	19.1953	23.3229	23.993	23.2254	23.4599	22.1011	23.3534	22.8708	22.8652	22.4386	22.7009	6	2	1	4	3	3	1	1	2	1	2	6	3	0	86.03
I6Y498_MYCTU Anion transporter OS=Mycobacterium tuberculosis (strain ATCC 25618 / H37Rv) GN=Rv3680 PE=1 SV=1;A0A0H3MA85_MYCBP Probable anion transporter atpase OS=Mycobacterium bovis (strain BCG / Pasteur 1173P2) GN=BCG_3739 PE=4 SV=1	cell wall and cell processes	Rv3680	I6Y498	A0A0H3MA85	41.404	13.5	17.6964	21.9788	17.5816	20.397	20.4171	21.0699	24.441	19.6584	18.7182	21.3464	18.0493	18.3032	3	0	1	1	1	3	1	1	0	1	1	2	1	0	42.535
MYCP3_MYCTU Mycosin-3 OS=Mycobacterium tuberculosis (strain ATCC 25618 / H37Rv) GN=mycP3 PE=1 SV=1;A0A0H3MA90_MYCBP Probable protease OS=Mycobacterium bovis (strain BCG / Pasteur 1173P2) GN=BCG_0331 PE=4 SV=1	intermediary metabolism and respiration	Rv0291	O53695	A0A0H3MA90	46.127	4.8	22.1593	18.7655	22.151	21.4955	18.8187	20.7109	20.0719	22.2459	22.1553	19.761	18.3592	21.4206	1	1	1	1	1	0	1	1	1	1	1	0	1	0	14.859
I6YB06_MYCTU Glutaredoxin OS=Mycobacterium tuberculosis (strain ATCC 25618 / H37Rv) GN=nrdH PE=1 SV=1;A0A0H3MA92_MYCBP Probable glutaredoxin electron transport component of nrdEF (Glutaredoxin-like protein) nrdH OS=Mycobacterium bovis (strain BCG / Pasteur	information pathways	Rv3053c	I6YB06	A0A0H3MA92	8.4186	48.1	22.6556	19.3393	22.9706	22.4517	17.6824	24.6629	17.9795	18.5868	18.1241	19.5283	21.443	18.1309	2	1	1	1	1	1	1	1	1	1	0	1	0	0	15.264
RISA_MYCTU Riboflavin synthase OS=Mycobacterium tuberculosis (strain ATCC 25618 / H37Rv) GN=ribE PE=1 SV=1;A0A0H3MA94_MYCBP Probable riboflavin synthase alpha chain ribC OS=Mycobacterium bovis (strain BCG / Pasteur 1173P2) GN=ribC PE=4 SV=1	intermediary metabolism and respiration	Rv1412	P9WK35	A0A0H3MA94	21.32	45.3	20.9004	22.0433	21.4772	21.4971	21.7346	21.3421	21.9732	22.39	22.1572	22.4628	22.9774	21.9609	7	5	2	5	4	6	4	2	2	3	2	6	3	0	34.58
O69658_MYCTU Membrane protein OS=Mycobacterium tuberculosis (strain ATCC 25618 / H37Rv) GN=Rv3690 PE=1 SV=3;A0A0H3MA97_MYCBP Probable conserved membrane protein OS=Mycobacterium bovis (strain BCG / Pasteur 1173P2) GN=BCG_3749 PE=4 SV=1	cell wall and cell processes	Rv3690	O69658	A0A0H3MA97	23.751	61.3	19.4554	19.477	19.9419	18.9586	21.2649	21.5479	20.0598	18.0693	19.4947	19.2918	21.1593	18.6168	8	1	1	2	1	6	2	1	1	0	1	5	1	0	64.927
A0A0H3MAA2_MYCBP Uncharacterized protein OS=Mycobacterium bovis (strain BCG / Pasteur 1173P2) GN=BCG_3954c PE=4 SV=1	Unknown		A0A0H3MAA2	O05447	32.134	15.5	16.3143	19.6164	16.2191	18.6535	21.0954	15.6045	20.2755	19.5576	19.2124	19.9581	18.1701	17.287	3	2	1	2	0	3	2	0	0	0	0	0	0	0	12.152
O69663_MYCTU Membrane protein OS=Mycobacterium tuberculosis (strain ATCC 25618 / H37Rv) GN=Rv3695 PE=1 SV=1;A0A0H3MAA3_MYCBP Possible conserved membrane protein OS=Mycobacterium bovis (strain BCG / Pasteur 1173P2) GN=BCG_3754 PE=4 SV=1	cell wall and cell processes	Rv3695	O69663	A0A0H3MAA3	33.167	17.4	19.5157	21.1914	18.567	21.2068	19.8031	20.993	19.0478	22.3676	20.4541	21.178	20.9977	19.4653	2	1	1	1	2	1	1	0	1	1	1	1	1	0	6.2534
I6Y2G3_MYCTU Probable phosphoglucomutase PgmA (Glucose phosphomutase) (PGM) OS=Mycobacterium tuberculosis (strain ATCC 25618 / H37Rv) GN=pgmA PE=1 SV=1;A0A0H3MAA5_MYCBP Probable phosphoglucomutase pgmA OS=Mycobacterium bovis (strain BCG / Pasteur 1173P2) G	intermediary metabolism and respiration	Rv3068c	I6Y2G3	A0A0H3MAA5	58.265	31.3	24.5635	23.1029	24.1697	23.9286	17.5262	19.0446	20.8692	18.8046	23.8133	19.7056	19.6797	24.2939	9	3	2	2	4	4	1	1	2	2	1	4	3	0	80.445
O69667_MYCTU Conserved protein OS=Mycobacterium tuberculosis (strain ATCC 25618 / H37Rv) GN=Rv3699 PE=1 SV=3;A0A0H3MAA8_MYCBP Uncharacterized protein OS=Mycobacterium bovis (strain BCG / Pasteur 1173P2) GN=BCG_3758 PE=4 SV=1	Conserved hypotheticals	Rv3699	O69667	A0A0H3MAA8	24.998	68.7	25.4089	25.6696	24.6955	26.0618	23.3844	26.4412	25.3387	26.3856	24.8384	26.6148	25.929	25.0578	10	8	7	9	7	7	9	8	7	9	9	9	9	0	73.92
G3P_MYCTU Glyceraldehyde-3-phosphate dehydrogenase OS=Mycobacterium tuberculosis (strain ATCC 25618 / H37Rv) GN=gap PE=1 SV=1;G3P_MYCBP Glyceraldehyde-3-phosphate dehydrogenase OS=Mycobacterium bovis (strain BCG / Pasteur 1173P2) GN=gap PE=1 SV=1	intermediary metabolism and respiration	Rv1436	P9WN83	A0A0H3MAB5	35.955	67.3	24.5399	24.8224	24.6042	23.8928	25.0801	24.8617	24.0293	23.8594	24.1484	24.0867	26.9513	25.5201	15	12	9	13	10	15	11	8	10	8	8	14	14	0	265.79
O06816_MYCTU Uncharacterized protein OS=Mycobacterium tuberculosis (strain ATCC 25618 / H37Rv) GN=Rv1443c PE=1 SV=1;A0A0H3MAB7_MYCBP Uncharacterized protein OS=Mycobacterium bovis (strain BCG / Pasteur 1173P2) GN=BCG_1504c PE=4 SV=1	Conserved hypotheticals	Rv1443c	O06816	A0A0H3MAB7	18.316	41.6	20.5114	21.0349	20.2696	21.1562	22.3502	22.8417	19.8753	20.7008	20.8636	20.5598	23.7365	18.5752	5	2	2	3	2	3	3	1	2	3	2	4	2	0	16.559
A0A0H3MAC0_MYCBP Transketolase OS=Mycobacterium bovis (strain BCG / Pasteur 1173P2) GN=tkt PE=3 SV=1;TKT_MYCTU Transketolase OS=Mycobacterium tuberculosis (strain ATCC 25618 / H37Rv) GN=tkt PE=1 SV=1	intermediary metabolism and respiration	Rv1449c	A0A0H3MAC0	P9WG25	75.54	61.4	23.9063	24.8779	25.0008	25.6007	24.604	25.4917	25.6042	25.7512	25.3822	24.9124	26.0164	24.9568	29	17	13	21	19	20	15	8	12	13	12	22	23	0	323.31
O53147_MYCTU Conserved protein OS=Mycobacterium tuberculosis (strain ATCC 25618 / H37Rv) GN=Rv1455 PE=1 SV=3;A0A0H3MAC2_MYCBP Uncharacterized protein OS=Mycobacterium bovis (strain BCG / Pasteur 1173P2) GN=BCG_1516 PE=4 SV=1	Conserved hypotheticals	Rv1455	O53147	A0A0H3MAC2	31.426	27.9	21.7921	21.4233	23.4645	22.6549	20.7138	21.107	19.8982	22.7928	22.9904	22.1323	21.4235	18.1436	5	2	2	2	4	2	3	1	2	1	3	4	0	0	24.546
O06302_MYCTU MerR family transcriptional regulator OS=Mycobacterium tuberculosis (strain ATCC 25618 / H37Rv) GN=hspR PE=1 SV=1;A0A0H3MAC9_MYCBP Probable heat shock protein transcriptional regulator hspR (MerR family) OS=Mycobacterium bovis (strain BCG / Pa	virulence, detoxification and adaptation	Rv0353	O06302	A0A0H3MAC9	14.126	34.1	17.5437	19.9473	18.464	20.3261	18.053	20.367	20.7498	20.7199	19.4269	20.2852	19.4555	18.8407	3	2	1	2	2	1	2	0	2	1	2	2	0	0	4.9816
O53156_MYCTU Nitrogen fixation protein NifU OS=Mycobacterium tuberculosis (strain ATCC 25618 / H37Rv) GN=Rv1465 PE=1 SV=1;A0A0H3MAD0_MYCBP Possible nitrogen fixation related protein OS=Mycobacterium bovis (strain BCG / Pasteur 1173P2) GN=BCG_1526 PE=4 SV=1	intermediary metabolism and respiration	Rv1465	O53156	A0A0H3MAD0	17.711	66	23.3648	24.6968	23.5643	24.5233	23.3696	24.7931	24.5642	24.4505	23.5344	24.3697	26.1024	23.5739	7	7	3	6	3	7	6	4	2	4	2	6	5	0	60.262
EGTA_MYCTU Glutamate--cysteine ligase EgtA OS=Mycobacterium tuberculosis (strain ATCC 25618 / H37Rv) GN=egtA PE=1 SV=1;A0A0H3MAD4_MYCBP Glutamate--cysteine ligase EgtA OS=Mycobacterium bovis (strain BCG / Pasteur 1173P2) GN=gshA PE=3 SV=1	intermediary metabolism and respiration	Rv3704c	P9WPK7	A0A0H3MAD4	45.795	9	23.492	19.7759	23.8051	23.351	18.1544	23.5823	19.9195	22.7909	18.7983	19.2936	18.0386	22.4937	2	2	0	2	2	1	2	0	2	1	1	1	1	0	51.47
DHAS_MYCTU Aspartate-semialdehyde dehydrogenase OS=Mycobacterium tuberculosis (strain ATCC 25618 / H37Rv) GN=asd PE=1 SV=1;A0A0H3MAD8_MYCBP Aspartate-semialdehyde dehydrogenase OS=Mycobacterium bovis (strain BCG / Pasteur 1173P2) GN=asd PE=3 SV=1	intermediary metabolism and respiration	Rv3708c	P9WNX5	A0A0H3MAD8	36.23	38.6	23.8693	24.2714	24.4345	24.1187	23.2379	25.3323	23.707	24.058	23.3859	24.4327	25.278	24.1995	8	4	4	7	4	7	6	3	5	3	3	6	6	0	60.232
I6XI14_MYCTU Possible cobyric acid synthase CobQ2 OS=Mycobacterium tuberculosis (strain ATCC 25618 / H37Rv) GN=cobQ2 PE=1 SV=1;A0A0H3MAE4_MYCBP Possible cobyric acid synthase cobQ2 OS=Mycobacterium bovis (strain BCG / Pasteur 1173P2) GN=cobQ2 PE=4 SV=1	intermediary metabolism and respiration	Rv3713	I6XI14	A0A0H3MAE4	24.157	38.5	22.4959	21.5919	20.9194	22.758	19.7275	22.4319	21.019	22.5816	18.8764	22.2495	22.6059	20.316	5	3	2	4	3	2	2	2	2	1	2	2	2	0	74.126
Q79FN7_MYCTU ATPase OS=Mycobacterium tuberculosis (strain ATCC 25618 / H37Rv) GN=moxR1 PE=1 SV=1;A0A0H3MAE5_MYCBP Probable transcriptional regulatory protein moxR1 OS=Mycobacterium bovis (strain BCG / Pasteur 1173P2) GN=moxR1 PE=4 SV=1	Regulatory proteins	Rv1479	Q79FN7	A0A0H3MAE5	40.762	80.4	23.599	25.8695	24.2817	25.5603	24.5577	24.8229	24.8805	25.3681	24.8723	25.0501	25.8779	25.5009	18	15	10	15	13	15	11	6	9	9	8	16	14	0	130.47
A0A0H3MAE7_MYCBP Possible fatty acid synthase OS=Mycobacterium bovis (strain BCG / Pasteur 1173P2) GN=BCG_3780 PE=4 SV=1	Intermediary metabolism and respiration		A0A0H3MAE7		46.852	49.8	23.4102	22.6689	22.0426	25.5289	21.9044	23.238	23.6951	24.4327	23.0649	23.8034	23.6346	22.9596	1	0	1	1	0	0	1	1	0	1	0	1	0	0	176.94
MAZF4_MYCTU Endoribonuclease MazF4 OS=Mycobacterium tuberculosis (strain ATCC 25618 / H37Rv) GN=mazF4 PE=1 SV=1;A0A0H3MAF2_MYCBP Uncharacterized protein OS=Mycobacterium bovis (strain BCG / Pasteur 1173P2) GN=BCG_1558 PE=4 SV=1	virulence, detoxification and adaptation	Rv1495	P9WII5	A0A0H3MAF2	11.41	47.6	18.9289	19.1749	18.914	21.7283	18.9082	21.6765	18.3007	21.3606	18.0497	20.9858	20.53	20.3621	4	1	1	3	2	4	2	1	2	2	2	3	2	0	9.5283
P71784_MYCTU Transferase OS=Mycobacterium tuberculosis (strain ATCC 25618 / H37Rv) GN=Rv1505c PE=1 SV=1;A0A0H3MAF7_MYCBP Uncharacterized protein OS=Mycobacterium bovis (strain BCG / Pasteur 1173P2) GN=BCG_1568c PE=4 SV=1	Conserved hypotheticals	Rv1505c	P71784	A0A0H3MAF7	24.056	19.5	23.9256	21.7164	24.7539	23.099	15.5362	22.0433	19.3888	22.191	22.9196	22.0175	18.6808	24.5753	2	1	2	2	2	0	2	1	2	2	2	1	2	0	14.84
PKNG_MYCTU Serine/threonine-protein kinase PknG OS=Mycobacterium tuberculosis (strain ATCC 25618 / H37Rv) GN=pknG PE=1 SV=1;A0A0H3MAF8_MYCBP Serine/threonine-protein kinase pknG OS=Mycobacterium bovis (strain BCG / Pasteur 1173P2) GN=pknG PE=4 SV=1	Regulatory proteins	Rv0410c	P9WI73	A0A0H3MAF8	81.576	26.8	23.5582	22.6961	22.5192	23.5987	20.2298	23.2131	22.8313	24.0128	22.5059	22.0052	21.2166	20.5806	13	4	3	4	7	5	6	2	7	5	5	8	3	0	50.381
FAD25_MYCTU Putative fatty-acid--CoA ligase fadD25 OS=Mycobacterium tuberculosis (strain ATCC 25618 / H37Rv) GN=fadD25 PE=1 SV=1;A0A0H3MAG0_MYCBP Probable fatty-acid-CoA ligase fadD25 OS=Mycobacterium bovis (strain BCG / Pasteur 1173P2) GN=fadD25 PE=4 SV=1	lipid metabolism	Rv1521	P9WQ45	A0A0H3MAG0	63.141	22.1	23.0444	22.4709	23.4409	22.8991	18.2217	23.7969	18.7591	21.8453	22.273	22.4007	21.8651	22.3383	6	4	4	4	3	1	4	1	3	3	2	5	4	0	51.274
DEVR_MYCTU Transcriptional regulatory protein DevR (DosR) OS=Mycobacterium tuberculosis (strain ATCC 25618 / H37Rv) GN=devR PE=1 SV=1;A0A0H3MAG2_MYCBP Two component transcriptional regulatory protein devR (Probably luxR/uhpA-family) OS=Mycobacterium bovis	Regulatory proteins	Rv3133c	P9WMF9	A0A0H3MAG2	23.294	40.6	23.0093	26.1124	23.2721	24.3669	22.3103	23.7479	25.6194	24.3218	23.4721	23.3843	24.9295	23.3605	7	4	4	2	2	6	3	2	2	3	2	4	4	0	65.647
THID_MYCTU Hydroxymethylpyrimidine/phosphomethylpyrimidine kinase OS=Mycobacterium tuberculosis (strain ATCC 25618 / H37Rv) GN=thiD PE=1 SV=1;A0A0H3MAG3_MYCBP Probable phosphomethylpyrimidine kinase thiD OS=Mycobacterium bovis (strain BCG / Pasteur 1173P2)	intermediary metabolism and respiration	Rv0422c	P9WG77	A0A0H3MAG3	27.51	15.5	20.138	20.2526	19.7497	22.2157	19.25	21.0937	18.9244	20.6811	19.8181	20.269	19.7667	18.6897	3	1	3	1	3	2	3	1	3	1	3	2	1	0	14.114
O53905_MYCTU Carboxymuconolactone decarboxylase OS=Mycobacterium tuberculosis (strain ATCC 25618 / H37Rv) GN=Rv1531 PE=1 SV=1;A0A0H3MAG7_MYCBP Uncharacterized protein OS=Mycobacterium bovis (strain BCG / Pasteur 1173P2) GN=BCG_1583 PE=4 SV=1	Conserved hypotheticals	Rv1531	O53905	A0A0H3MAG7	20.795	57.4	24.6494	23.5436	25.7701	24.2982	18.0431	24.6523	24.151	23.5906	25.0296	23.8549	23.1025	18.6418	6	3	2	4	4	2	4	3	4	3	2	4	2	0	83.31
Y3143_MYCTU Uncharacterized response regulatory protein Rv3143 OS=Mycobacterium tuberculosis (strain ATCC 25618 / H37Rv) GN=Rv3143 PE=1 SV=1;A0A0H3MAG8_MYCBP Probable response regulator OS=Mycobacterium bovis (strain BCG / Pasteur 1173P2) GN=BCG_3166 PE=4	Regulatory proteins	Rv3143	P9WGL7	A0A0H3MAG8	14.386	77.4	23.124	24.2505	22.8301	23.8902	26.0256	24.8011	24.7584	24.5588	24.2077	24.9442	24.9264	23.0348	7	7	5	6	4	5	6	2	3	4	4	7	6	0	102.89
P96281_MYCTU ATPase OS=Mycobacterium tuberculosis (strain ATCC 25618 / H37Rv) GN=Rv0435c PE=1 SV=2;A0A0H3MAG9_MYCBP Putative conserved atpase OS=Mycobacterium bovis (strain BCG / Pasteur 1173P2) GN=BCG_0474c PE=3 SV=1	cell wall and cell processes	Rv0435c	P96281	A0A0H3MAG9	75.345	14.7	18.9342	19.058	21.8984	21.5576	20.6865	22.4769	19.6308	19.6166	22.3398	19.2928	21.7845	17.8441	5	2	2	2	3	4	3	2	1	2	1	2	1	0	23.761
SYI_MYCTU Isoleucine--tRNA ligase OS=Mycobacterium tuberculosis (strain ATCC 25618 / H37Rv) GN=ileS PE=1 SV=1;A0A0H3MAH0_MYCBP Isoleucine--tRNA ligase OS=Mycobacterium bovis (strain BCG / Pasteur 1173P2) GN=ileS PE=3 SV=1	information pathways	Rv1536	P9WFV3	A0A0H3MAH0	117.34	17	22.3264	22.3646	22.8422	21.5987	17.7794	21.7816	19.6702	19.0099	22.2949	20.2628	21.4949	19.101	11	2	4	3	4	4	2	2	1	3	1	5	2	0	31.859
A0A0H3MAH1_MYCBP Putative oxidoreductase OS=Mycobacterium bovis (strain BCG / Pasteur 1173P2) GN=BCG_3785 PE=4 SV=1;O69692_MYCTU Oxidoreductase OS=Mycobacterium tuberculosis (strain ATCC 25618 / H37Rv) GN=Rv3725 PE=4 SV=1	intermediary metabolism and respiration	Rv3725	A0A0H3MAH1	O69692	34.772	43.5	21.0324	17.9449	19.2981	20.852	22.5827	21.4327	20.2678	20.3546	20.0419	19.127	20.0201	19.1776	10	2	1	5	4	6	5	0	2	1	2	3	2	0	93.951
NUOG_MYCTU NADH-quinone oxidoreductase subunit G OS=Mycobacterium tuberculosis (strain ATCC 25618 / H37Rv) GN=nuoG PE=1 SV=1;A0A0H3MAH2_MYCBP NADH-quinone oxidoreductase OS=Mycobacterium bovis (strain BCG / Pasteur 1173P2) GN=nuoG PE=3 SV=1	intermediary metabolism and respiration	Rv3151	P9WIV9	A0A0H3MAH2	85.423	43.5	23.6839	23.4628	22.791	24.5832	22.0992	24.8975	22.7648	23.6552	22.7139	22.9907	23.7496	21.6461	25	5	6	11	10	18	10	3	7	4	4	13	10	0	128.73
Y1546_MYCTU Uncharacterized protein Rv1546 OS=Mycobacterium tuberculosis (strain ATCC 25618 / H37Rv) GN=Rv1546 PE=1 SV=1;A0A0H3MAH9_MYCBP Uncharacterized protein OS=Mycobacterium bovis (strain BCG / Pasteur 1173P2) GN=BCG_1599 PE=4 SV=1	Conserved hypotheticals	Rv1546	P9WLU7	A0A0H3MAH9	15.324	54.5	20.8021	21.0341	19.85	24.4168	20.7856	22.0998	19.7909	24.2912	20.3699	22.2973	22.2675	21.0402	4	2	3	4	2	3	3	3	2	4	2	4	3	0	19.339
ALDH_MYCTU Probable aldehyde dehydrogenase OS=Mycobacterium tuberculosis (strain ATCC 25618 / H37Rv) GN=Rv0458 PE=1 SV=1;A0A0H3MAI2_MYCBP Probable aldehyde dehydrogenase OS=Mycobacterium bovis (strain BCG / Pasteur 1173P2) GN=BCG_0498 PE=3 SV=1	intermediary metabolism and respiration	Rv0458	P9WNY1	A0A0H3MAI2	54.574	16.2	22.1121	19.0415	21.1657	21.3641	18.6079	23.7888	18.6753	20.2922	21.5253	18.468	22.2482	20.3516	4	2	1	3	2	3	1	1	1	2	1	2	3	0	23.64
FADB2_MYCTU 3-hydroxybutyryl-CoA dehydrogenase OS=Mycobacterium tuberculosis (strain ATCC 25618 / H37Rv) GN=fadB2 PE=1 SV=1;A0A0H3MAI7_MYCBP Probable 3-hydroxybutyryl-CoA dehydrogenase fadB2 OS=Mycobacterium bovis (strain BCG / Pasteur 1173P2) GN=fadB2 PE=	lipid metabolism	Rv0468	P9WNP7	A0A0H3MAI7	30.728	71.3	26.1493	25.4828	25.4683	25.9893	26.4163	25.5557	24.8578	25.3466	24.3151	25.733	26.3178	25.9572	15	10	6	11	7	13	9	6	8	9	5	13	13	0	251.14
O69714_MYCTU Conserved protein OS=Mycobacterium tuberculosis (strain ATCC 25618 / H37Rv) GN=Rv3747 PE=1 SV=1;A0A0H3MAI9_MYCBP Uncharacterized protein OS=Mycobacterium bovis (strain BCG / Pasteur 1173P2) GN=BCG_3806 PE=4 SV=1	Conserved hypotheticals	Rv3747	O69714	A0A0H3MAI9	13.539	47.2	22.429	23.0035	23.3209	22.7836	21.5068	22.6876	19.3664	23.4756	19.4432	22.8828	23.7083	24.2644	4	3	2	4	2	3	4	3	2	2	2	4	4	0	120.16
FQR58_MYCTU F420H(2)-dependent quinone reductase Rv1558 OS=Mycobacterium tuberculosis (strain ATCC 25618 / H37Rv) GN=Rv1558 PE=1 SV=1;A0A0H3MAJ0_MYCBP Uncharacterized protein OS=Mycobacterium bovis (strain BCG / Pasteur 1173P2) GN=BCG_1610 PE=4 SV=1	Conserved hypotheticals	Rv1558	P9WP11	A0A0H3MAJ0	16.347	76.4	22.5894	23.267	22.5492	24.3708	23.6634	25.0109	23.0971	24.2667	23.2157	24.6139	25.3146	23.829	9	8	6	6	6	9	8	5	6	6	4	8	8	0	119.29
NADC_MYCTU Nicotinate-nucleotide pyrophosphorylase [carboxylating] OS=Mycobacterium tuberculosis (strain ATCC 25618 / H37Rv) GN=nadC PE=1 SV=1;A0A0H3MAJ7_MYCBP Probable nicotinate-nucleotide pyrophosphatase nadC OS=Mycobacterium bovis (strain BCG / Pasteur	intermediary metabolism and respiration	Rv1596	P9WJJ7	A0A0H3MAJ7	29.951	29.8	17.4247	19.6982	19.098	18.2302	21.779	18.9693	19.1974	18.691	19.5294	19.6231	24.498	23.1234	6	1	1	1	1	2	1	1	1	1	1	5	5	0	38.87
Y479_MYCTU Uncharacterized protein Rv0479c OS=Mycobacterium tuberculosis (strain ATCC 25618 / H37Rv) GN=Rv0479c PE=1 SV=1;A0A0H3MAK0_MYCBP Probable conserved membrane protein OS=Mycobacterium bovis (strain BCG / Pasteur 1173P2) GN=BCG_0520c PE=4 SV=1	cell wall and cell processes	Rv0479c	P9WKV7	A0A0H3MAK0	37.048	54.9	25.6552	24.605	24.6767	25.5877	22.3526	24.5112	24.4587	25.3486	25.3617	25.2519	24.2185	24.1509	12	4	5	7	8	9	7	5	7	5	6	8	9	0	112.26
A0A0H3MAK1_MYCBP Tryptophan synthase beta chain OS=Mycobacterium bovis (strain BCG / Pasteur 1173P2) GN=trpB PE=3 SV=1;TRPB_MYCTU Tryptophan synthase beta chain OS=Mycobacterium tuberculosis (strain ATCC 25618 / H37Rv) GN=trpB PE=1 SV=1	intermediary metabolism and respiration	Rv1612	A0A0H3MAK1	P9WFX9	43.286	51.2	23.3069	23.8033	22.8444	23.8887	21.3635	24.0322	23.3231	23.4359	23.7692	23.6193	23.4321	22.8975	14	3	5	5	6	11	5	2	5	3	3	8	5	0	68.919
SERB1_MYCTU Phosphoserine phosphatase SerB1 OS=Mycobacterium tuberculosis (strain ATCC 25618 / H37Rv) GN=serB1 PE=1 SV=1;A0A0H3MAK8_MYCBP Possible phosphoserine phosphatase serB1 OS=Mycobacterium bovis (strain BCG / Pasteur 1173P2) GN=serB1 PE=4 SV=1	intermediary metabolism and respiration	Rv0505c	P9WGJ3	A0A0H3MAK8	32.673	30.5	24.2554	24.7131	23.6436	24.7486	20.3643	24.3068	24.1244	24.6805	24.4576	24.379	22.9483	22.025	5	2	4	4	5	4	5	4	5	4	5	5	2	0	111.82
O06389_MYCTU Conserved protein OS=Mycobacterium tuberculosis (strain ATCC 25618 / H37Rv) GN=Rv0523c PE=1 SV=3;A0A0H3MAL9_MYCBP Uncharacterized protein OS=Mycobacterium bovis (strain BCG / Pasteur 1173P2) GN=BCG_0566c PE=4 SV=1	Conserved hypotheticals	Rv0523c	O06389	A0A0H3MAL9	14.827	29.8	24.5788	19.2469	23.2611	22.8076	18.5432	19.0706	22.6726	18.8189	24.8552	21.876	23.4105	22.6037	3	1	1	1	2	0	2	2	1	2	2	2	1	0	71.357
Y3198_MYCTU Putative glutaredoxin Rv3198.1 OS=Mycobacterium tuberculosis (strain ATCC 25618 / H37Rv) GN=Rv3198.1 PE=1 SV=1;A0A0H3MAM3_MYCBP Possible glutaredoxin protein OS=Mycobacterium bovis (strain BCG / Pasteur 1173P2) GN=BCG_3223 PE=4 SV=1	intermediary metabolism and respiration	Rv3198A	P9WN17	A0A0H3MAM3	8.9631	35.7	18.7232	20.1768	15.8526	19.5178	19.8702	14.8072	19.2152	19.1972	18.6547	18.4457	18.3506	18.2342	2	1	0	2	1	2	2	0	1	0	0	0	1	0	41.013
P72047_MYCTU ABC transporter ATP-binding protein OS=Mycobacterium tuberculosis (strain ATCC 25618 / H37Rv) GN=rfbE PE=1 SV=2;A0A0H3MAN3_MYCBP Probable O-antigen/lipopolysaccharide transport ATP-binding protein ABC transporter rfbE OS=Mycobacterium bovis (s	cell wall and cell processes	Rv3781	P72047	A0A0H3MAN3	29.992	16.8	19.2022	20.107	20.3329	20.4293	19.5489	19.0039	19.5115	20.5355	20.1001	21.022	20.3995	18.5011	3	0	3	2	2	0	1	1	2	2	1	2	1	0	8.5765
O05858_MYCTU Probable transcriptional regulatory protein (Probably TetR-family) OS=Mycobacterium tuberculosis (strain ATCC 25618 / H37Rv) GN=Rv3208 PE=1 SV=1;A0A0H3MAN5_MYCBP Probable transcriptional regulatory protein (Probably tetR-family) OS=Mycobacteri	Regulatory proteins	Rv3208	O05858	A0A0H3MAN5	25.166	53.1	23.4293	23.3727	24.1865	23.5272	17.7386	22.359	22.7085	22.6716	23.2686	22.9663	21.1554	21.9699	8	3	5	7	5	1	4	5	5	5	5	6	5	0	70.812
DPO1_MYCTU DNA polymerase I OS=Mycobacterium tuberculosis (strain ATCC 25618 / H37Rv) GN=polA PE=1 SV=1;A0A0H3MAN7_MYCBP DNA polymerase I polA OS=Mycobacterium bovis (strain BCG / Pasteur 1173P2) GN=polA PE=3 SV=1	information pathways	Rv1629	P9WNU5	A0A0H3MAN7	98.471	26.3	22.7225	20.3126	20.2357	22.3729	20.4975	21.1897	20.5472	22.5754	19.3053	21.8965	21.313	21.1494	17	4	3	5	4	11	4	2	3	1	4	11	9	0	72.614
VAPB3_MYCTU Antitoxin VapB3 OS=Mycobacterium tuberculosis (strain ATCC 25618 / H37Rv) GN=vapB3 PE=1 SV=1;A0A0H3MAN8_MYCBP Uncharacterized protein OS=Mycobacterium bovis (strain BCG / Pasteur 1173P2) GN=BCG_0595c PE=4 SV=1	virulence, detoxification and adaptation	Rv0550c	P9WJ59	A0A0H3MAN8	9.5437	68.2	23.4708	24.6836	24.106	20.5598	24.7104	24.0628	25.333	22.0544	26.1362	22.575	23.8453	26.6533	4	3	3	3	3	3	3	3	2	3	2	4	4	0	74.67
O53581_MYCTU Cutinase OS=Mycobacterium tuberculosis (strain ATCC 25618 / H37Rv) GN=Rv3802c PE=1 SV=1;A0A0H3MAQ0_MYCBP Uncharacterized protein OS=Mycobacterium bovis (strain BCG / Pasteur 1173P2) GN=BCG_3864c PE=4 SV=1	cell wall and cell processes	Rv3802c	O53581	A0A0H3MAQ0	35.448	25.3	19.604	19.7166	19.5739	19.5294	17.749	19.3371	20.5466	18.545	18.8594	21.0558	17.5805	19.864	4	0	1	2	2	1	2	1	1	2	2	2	2	0	58.122
GLFT2_MYCTU Galactofuranosyltransferase GlfT2 OS=Mycobacterium tuberculosis (strain ATCC 25618 / H37Rv) GN=glfT2 PE=1 SV=1;A0A0H3MAQ2_MYCBP Galactofuranosyl transferase OS=Mycobacterium bovis (strain BCG / Pasteur 1173P2) GN=BCG_3870c PE=4 SV=1	cell wall and cell processes	Rv3808c	O53585	A0A0H3MAQ2	71.506	24.8	23.1174	22.7562	23.4361	22.8283	19.7173	21.9132	21.2833	23.162	22.0098	19.5974	22.1428	22.2516	9	3	4	3	5	4	4	1	2	4	1	5	5	0	32.942
A0A0H3MAQ9_MYCBP Diacylglycerol O-acyltransferase OS=Mycobacterium bovis (strain BCG / Pasteur 1173P2) GN=BCG_3263c PE=3 SV=1;TGS3_MYCTU Probable diacyglycerol O-acyltransferase tgs3 OS=Mycobacterium tuberculosis (strain ATCC 25618 / H37Rv) GN=tgs3 PE=1 SV	lipid metabolism	Rv3233c/Rv3234c	A0A0H3MAQ9	P9WKC5	50.995	30.5	22.615	22.5056	23.277	23.9499	22.4373	22.9626	19.8111	22.7441	22.4292	20.2192	21.1869	22.5828	7	3	3	4	4	2	4	0	3	2	1	4	2	0	74.298
L7N673_MYCTU Uncharacterized protein OS=Mycobacterium tuberculosis (strain ATCC 25618 / H37Rv) GN=Rv1638A PE=1 SV=1;A0A0H3MAR1_MYCBP Uncharacterized protein OS=Mycobacterium bovis (strain BCG / Pasteur 1173P2) GN=BCG_1677c PE=4 SV=1	Conserved hypotheticals	Rv1638A	L7N673	A0A0H3MAR1	9.5071	69.4	18.0154	19.099	17.5728	17.0002	22.2953	17.1774	19.435	17.0123	18.8362	21.2905	15.974	17.3175	5	1	0	4	3	5	4	1	2	1	0	3	2	0	61.35
A0A0H3MAR6_MYCBP Probable transcriptional regulatory protein (Possibly arsR-family) OS=Mycobacterium bovis (strain BCG / Pasteur 1173P2) GN=BCG_0621 PE=4 SV=1;O53773_MYCTU Probable transcriptional regulatory protein (Possibly ArsR-family) OS=Mycobacterium	Regulatory proteins	Rv0576/Rv3773c	A0A0H3MAR6	O53773	46.388	39.2	18.4717	23.4886	22.6569	21.1844	21.3628	22.8982	24.3173	22.6519	24.0964	21.8845	23.9493	23.0865	8	1	6	4	4	6	5	4	2	3	3	4	3	0	65.516
MTRA_MYCTU DNA-binding response regulator MtrA OS=Mycobacterium tuberculosis (strain ATCC 25618 / H37Rv) GN=mtrA PE=1 SV=1;A0A0H3MAR7_MYCBP Two component sensory transduction transcriptional regulatory protein mtrA OS=Mycobacterium bovis (strain BCG / Past	Regulatory proteins	Rv3246c	P9WGM7	A0A0H3MAR7	25.279	77.2	25.3625	25.4823	25.4715	24.4682	24.7827	25.2355	25.6079	24.3661	25.4543	25.368	25.1312	25.1376	11	7	5	9	4	7	7	7	6	7	6	9	9	0	319.23
ARGJ_MYCTU Arginine biosynthesis bifunctional protein ArgJ OS=Mycobacterium tuberculosis (strain ATCC 25618 / H37Rv) GN=argJ PE=1 SV=1;A0A0H3MAR8_MYCBP Arginine biosynthesis bifunctional protein ArgJ OS=Mycobacterium bovis (strain BCG / Pasteur 1173P2) GN=	intermediary metabolism and respiration	Rv1653	P9WPZ3	A0A0H3MAR8	41.147	53.2	22.0599	21.5488	22.3402	22.1157	21.807	23.5384	21.597	21.4254	21.7004	21.8251	22.5007	20.6185	12	3	4	6	6	10	5	4	4	3	3	7	6	0	86.454
MCE2R_MYCTU HTH-type transcriptional regulator Mce2R OS=Mycobacterium tuberculosis (strain ATCC 25618 / H37Rv) GN=mce2R PE=1 SV=1;A0A0H3MAS1_MYCBP Probable transcriptional regulatory protein (GntR-family) OS=Mycobacterium bovis (strain BCG / Pasteur 1173P2	Regulatory proteins	Rv0586	P9WMG5	A0A0H3MAS1	26.509	48.8	21.6573	18.9982	20.6619	21.3723	21.5514	21.2294	20.0852	18.6014	19.2875	19.7592	21.815	17.7072	9	3	2	4	4	7	3	1	1	1	1	6	1	0	30.269
O07810_MYCTU Conserved protein OS=Mycobacterium tuberculosis (strain ATCC 25618 / H37Rv) GN=Rv3813c PE=1 SV=1;A0A0H3MAS3_MYCBP Uncharacterized protein OS=Mycobacterium bovis (strain BCG / Pasteur 1173P2) GN=BCG_3875c PE=4 SV=1	Conserved hypotheticals	Rv3813c	O07810	A0A0H3MAS3	28.533	61.2	21.2508	21.9636	21.2646	21.1318	21.9569	23.0006	21.7288	21.3686	20.3988	21.8083	22.4461	17.5482	9	2	3	2	1	6	4	4	1	1	2	3	1	0	66.575
O86374_MYCTU Phosphomannomutase OS=Mycobacterium tuberculosis (strain ATCC 25618 / H37Rv) GN=manB PE=1 SV=1;A0A0H3MAS4_MYCBP Probable phosphomannomutase manB OS=Mycobacterium bovis (strain BCG / Pasteur 1173P2) GN=manB PE=4 SV=1	intermediary metabolism and respiration	Rv3257c	O86374	A0A0H3MAS4	49.04	51.2	23.0327	22.8844	22.8269	24.0127	22.8147	24.0382	22.3057	23.1679	22.9661	23.1946	24.6623	23.3312	14	7	5	5	5	11	4	5	3	5	5	7	8	0	137.38
Y3818_MYCTU Putative Rieske 2Fe-2S iron-sulfur protein Rv3818 OS=Mycobacterium tuberculosis (strain ATCC 25618 / H37Rv) GN=Rv3818 PE=1 SV=1;A0A0H3MAS6_MYCBP Uncharacterized protein OS=Mycobacterium bovis (strain BCG / Pasteur 1173P2) GN=BCG_3880 PE=4 SV=1	Conserved hypotheticals	Rv3818	P9WH21	A0A0H3MAS6	57.647	27.7	22.6034	22.0824	22.296	22.5942	17.838	22.6636	20.0474	18.3632	22.3871	19.6847	22.7005	22.6074	8	3	5	4	3	2	6	2	2	2	1	6	3	0	34.662
L7N6A5_MYCTU D-alpha-D-mannose-1-phosphate guanylyltransferase ManB (D-alpha-D-heptose-1-phosphate guanylyltransferase) OS=Mycobacterium tuberculosis (strain ATCC 25618 / H37Rv) GN=manB PE=1 SV=1;A0A0H3MAS8_MYCBP Probable mannose-1-phosphate guanyltransfer	cell wall and cell processes	Rv3264c	L7N6A5	A0A0H3MAS8	37.857	65.7	25.7177	25.269	25.2065	25.9821	23.5819	26.0645	25.0536	25.8163	25.0853	25.4183	26.1375	24.8491	19	8	5	10	8	14	9	3	6	8	5	9	8	0	226.76
P96874_MYCTU Conserved protein OS=Mycobacterium tuberculosis (strain ATCC 25618 / H37Rv) GN=Rv3269 PE=1 SV=1;A0A0H3MAT3_MYCBP Uncharacterized protein OS=Mycobacterium bovis (strain BCG / Pasteur 1173P2) GN=BCG_3298 PE=4 SV=1	virulence, detoxification and adaptation	Rv3269	P96874	A0A0H3MAT3	9.7501	71	25.2187	24.7679	25.2115	24.8038	25.7528	23.2678	24.6879	26.0977	27.3577	28.1481	24.939	27.5487	5	3	3	3	5	5	4	3	5	4	4	5	5	0	46.597
ACDP_MYCTU Probable acyl-CoA dehydrogenase fadE25 OS=Mycobacterium tuberculosis (strain ATCC 25618 / H37Rv) GN=fadE25 PE=1 SV=1;A0A0H3MAT7_MYCBP Probable acyl-CoA dehydrogenase fadE25 OS=Mycobacterium bovis (strain BCG / Pasteur 1173P2) GN=fadE25 PE=3 SV=1	lipid metabolism	Rv3274c	P9WQG1	A0A0H3MAT7	41.723	58.1	25.312	25.2046	24.9291	26.0568	26.2276	26.0941	24.9417	24.8593	25.036	26.347	24.5977	23.9239	19	12	6	12	14	13	14	6	11	7	4	14	11	0	169.26
Y635_MYCTU UPF0336 protein Rv0635 OS=Mycobacterium tuberculosis (strain ATCC 25618 / H37Rv) GN=Rv0635 PE=1 SV=1;A0A0H3MAU5_MYCBP UPF0336 protein BCG_0684 OS=Mycobacterium bovis (strain BCG / Pasteur 1173P2) GN=BCG_0684 PE=3 SV=1	intermediary metabolism and respiration	Rv0635	P9WFK1	A0A0H3MAU5	17.48	68.4	25.8264	24.8253	25.7917	24.7408	27.6249	24.4164	24.4733	24.3741	24.7231	24.8395	26.5026	26.001	8	8	4	8	5	6	8	3	6	6	3	7	7	0	110.95
P96890_MYCTU Acetyl-COA carboxylase OS=Mycobacterium tuberculosis (strain ATCC 25618 / H37Rv) GN=accA3 PE=1 SV=2;A0A0H3MAU6_MYCBP Probable bifunctional protein acetyl-/propionyl-coenzyme A carboxylase (Alpha chain) accA3: biotin carboxylase + biotin carbox	lipid metabolism	Rv3285	P96890	A0A0H3MAU6	63.782	65.7	24.8577	27.3044	25.4189	24.9556	23.9152	23.7939	26.7543	24.4415	25.1602	24.88	26.2106	26.5945	21	17	8	18	10	16	12	8	11	12	9	17	15	0	323.31
ESPR_MYCTU Nucleoid-associated protein EspR OS=Mycobacterium tuberculosis (strain ATCC 25618 / H37Rv) GN=espR PE=1 SV=1;A0A0H3MAU9_MYCBP Uncharacterized protein OS=Mycobacterium bovis (strain BCG / Pasteur 1173P2) GN=BCG_3912 PE=4 SV=1	Regulatory proteins	Rv3849	P9WJB7	A0A0H3MAU9	14.709	65.2	24.7417	24.2491	24.301	24.9875	26.3316	25.2169	24.1943	26.0576	24.2564	25.9234	24.3042	24.5783	7	5	5	4	7	5	7	4	4	4	2	6	7	0	131.42
A0A0H3MAV0_MYCBP Methoxy mycolic acid synthase 4 mmaA4 OS=Mycobacterium bovis (strain BCG / Pasteur 1173P2) GN=mmaA4 PE=4 SV=1;MMAA4_MYCTU Hydroxymycolate synthase MmaA4 OS=Mycobacterium tuberculosis (strain ATCC 25618 / H37Rv) GN=mmaA4 PE=1 SV=1	lipid metabolism	Rv0642c	A0A0H3MAV0	Q79FX8	34.636	74.8	23.9569	25.0923	24.391	23.6858	25.1549	25.2061	26.2485	23.938	25.1978	24.1101	25.2773	23.887	17	8	7	10	11	10	11	4	7	7	5	13	11	0	152.66
Y647_MYCTU Uncharacterized protein Rv0647c OS=Mycobacterium tuberculosis (strain ATCC 25618 / H37Rv) GN=Rv0647c PE=1 SV=1;A0A0H3MAV4_MYCBP Uncharacterized protein OS=Mycobacterium bovis (strain BCG / Pasteur 1173P2) GN=BCG_0696c PE=4 SV=1	Conserved hypotheticals	Rv0647c	P9WQI1	A0A0H3MAV4	54.823	29.7	22.4023	22.9992	23.2968	23.0531	18.1697	22.9667	20.4979	22.7343	22.7331	21.7315	21.6707	21.2825	10	2	7	7	7	3	7	1	4	4	2	6	6	0	83.261
ETHR_MYCTU HTH-type transcriptional regulator EthR OS=Mycobacterium tuberculosis (strain ATCC 25618 / H37Rv) GN=ethR PE=1 SV=1;A0A0H3MAV5_MYCBP Transcriptional regulatory repressor protein (TetR-family) ethR OS=Mycobacterium bovis (strain BCG / Pasteur 117	Regulatory proteins	Rv3855	P9WMC1	A0A0H3MAV5	23.756	26.9	25.0363	23.274	24.603	23.6278	17.8626	23.3159	24.4363	25.4274	24.8793	24.2376	23.0615	23.6113	4	3	2	3	3	1	3	3	2	2	2	4	3	0	71.597
O53356_MYCTU Conserved protein OS=Mycobacterium tuberculosis (strain ATCC 25618 / H37Rv) GN=Rv3304 PE=1 SV=3;A0A0H3MAV8_MYCBP Uncharacterized protein OS=Mycobacterium bovis (strain BCG / Pasteur 1173P2) GN=BCG_3369 PE=4 SV=1	Conserved hypotheticals	Rv3304	O53356	A0A0H3MAV8	17.488	55.3	22.1545	22.1605	21.4104	22.6166	21.8981	23.2581	23.52	23.0569	22.5118	19.4808	23.4248	22.4335	5	4	4	4	1	5	3	3	2	3	1	5	5	0	68.978
O53926_MYCTU Acyl-CoA dehydrogenase OS=Mycobacterium tuberculosis (strain ATCC 25618 / H37Rv) GN=fadE16 PE=1 SV=2;A0A0H3MAW2_MYCBP Possible acyl-CoA dehydrogenase fadE16 OS=Mycobacterium bovis (strain BCG / Pasteur 1173P2) GN=fadE16 PE=3 SV=1	lipid metabolism	Rv1679	O53926	A0A0H3MAW2	37.876	20.1	18.8565	18.8259	19.2183	20.9147	19.4933	20.2448	19.4683	18.8958	19.0211	18.5796	21.4549	19.404	5	2	1	2	2	5	2	0	1	1	1	3	1	0	18.08
I6XVW9_MYCTU Arylsulfatase OS=Mycobacterium tuberculosis (strain ATCC 25618 / H37Rv) GN=atsD PE=1 SV=1;A0A0H3MAW3_MYCBP Possible arylsulfatase atsD OS=Mycobacterium bovis (strain BCG / Pasteur 1173P2) GN=atsD PE=4 SV=1	intermediary metabolism and respiration	Rv0663	I6XVW9	A0A0H3MAW3	86.127	36.6	23.3772	22.2389	22.8468	23.1428	22.2248	22.1897	21.2054	22.2096	22.5621	22.1378	22.6577	21.8635	20	4	6	10	13	11	10	4	10	5	6	11	11	0	76.647
A0A0H3MAW4_MYCBP Possible acid phosphatase OS=Mycobacterium bovis (strain BCG / Pasteur 1173P2) GN=sapM PE=4 SV=1;O53361_MYCTU Acid phosphatase OS=Mycobacterium tuberculosis (strain ATCC 25618 / H37Rv) GN=sapM PE=1 SV=1	cell wall and cell processes	Rv3310	A0A0H3MAW4	O53361	31.777	23.7	24.0438	23.0052	23.8054	23.0941	18.1952	23.397	23.7131	22.8628	23.4269	23.6685	21.9101	23.1306	5	2	2	2	4	0	4	2	3	3	3	4	2	0	37.031
O33186_MYCTU Protein YcaR in KDO2-Lipid A biosynthesis cluster OS=Mycobacterium tuberculosis (strain ATCC 25618 / H37Rv) GN=Rv1684 PE=1 SV=1;A0A0H3MAW5_MYCBP Uncharacterized protein OS=Mycobacterium bovis (strain BCG / Pasteur 1173P2) GN=BCG_1722 PE=4 SV=1	Conserved hypotheticals	Rv1684	O33186	A0A0H3MAW5	8.2894	64.9	22.7013	25.04	21.5431	20.2781	21.4317	23.7862	25.0552	21.2977	22.4406	22.5817	24.0817	22.7063	3	3	2	2	1	3	2	3	1	2	2	3	3	0	92.794
ESPF_MYCTU ESX-1 secretion-associated protein EspF OS=Mycobacterium tuberculosis (strain ATCC 25618 / H37Rv) GN=espF PE=1 SV=1;A0A0H3MAW6_MYCBP Uncharacterized protein OS=Mycobacterium bovis (strain BCG / Pasteur 1173P2) GN=BCG_3928 PE=4 SV=1	cell wall and cell processes	Rv3865	P9WJD1	A0A0H3MAW6	10.618	95.1	27.8838	27.1959	26.7142	27.5906	27	27.2988	27.8436	29.208	27.0837	28.1495	26.2793	25.6227	7	7	4	7	5	6	6	6	4	6	3	7	5	0	143.49
A0A0H3MAX0_MYCBP Probable conserved transmembrane transport protein mmpL5 OS=Mycobacterium bovis (strain BCG / Pasteur 1173P2) GN=mmpL5 PE=4 SV=1;MMPL5_MYCTU Siderophore exporter MmpL5 OS=Mycobacterium tuberculosis (strain ATCC 25618 / H37Rv) GN=mmpL5 PE=1	cell wall and cell processes	Rv0676c	A0A0H3MAX0	P9WJV1	104.78	31	20.5584	20.0979	21.655	20.9385	19.8605	20.431	19.5474	20.4888	22.6771	20.6317	24.657	23.4306	19	1	1	3	6	6	5	1	4	6	3	14	14	0	65.678
NADK_MYCTU NAD kinase OS=Mycobacterium tuberculosis (strain ATCC 25618 / H37Rv) GN=ppnK PE=1 SV=1;A0A0H3MAX3_MYCBP NAD kinase OS=Mycobacterium bovis (strain BCG / Pasteur 1173P2) GN=ppnK PE=3 SV=1	intermediary metabolism and respiration	Rv1695	P9WHV7	A0A0H3MAX3	32.903	18.2	18.3787	19.599	18.8614	20.7924	18.7389	21.007	19.4511	18.793	21.5378	18.4875	20.7293	19.1322	4	1	3	1	2	1	2	2	1	2	1	4	3	0	19.637
VPB44_MYCTU Putative antitoxin VapB44 OS=Mycobacterium tuberculosis (strain ATCC 25618 / H37Rv) GN=vapB44 PE=4 SV=1;A0A0H3MAX4_MYCBP Uncharacterized protein OS=Mycobacterium bovis (strain BCG / Pasteur 1173P2) GN=BCG_3387c PE=4 SV=1	virulence, detoxification and adaptation	Rv3321c	P9WJ17	A0A0H3MAX4	8.8498	78.8	19.6214	20.5898	19.4289	19.0433	19.5945	19.1319	20.3448	19.4859	19.9439	19.2824	20.6738	20.7517	4	3	3	4	1	4	3	3	0	2	0	3	3	0	25.555
I6Y4G1_MYCTU Uncharacterized protein OS=Mycobacterium tuberculosis (strain ATCC 25618 / H37Rv) GN=Rv0690c PE=1 SV=1;A0A0H3MAX6_MYCBP Uncharacterized protein OS=Mycobacterium bovis (strain BCG / Pasteur 1173P2) GN=BCG_0739c PE=4 SV=1	Conserved hypotheticals	Rv0690c	I6Y4G1	A0A0H3MAX6	38.13	15.8	18.6326	20.5131	16.4326	19.4414	19.2839	17.8752	19.6085	18.535	17.9153	19.2676	17.5274	19.3713	5	0	0	4	3	3	3	0	1	1	1	4	1	0	9.9243
P95072_MYCTU Possible protease IV SppA (Endopeptidase IV) (Signal peptide peptidase) OS=Mycobacterium tuberculosis (strain ATCC 25618 / H37Rv) GN=sppA PE=1 SV=1;A0A0H3MAY5_MYCBP Possible protease IV sppA (Endopeptidase IV) OS=Mycobacterium bovis (strain BC	cell wall and cell processes	Rv0724	P95072	A0A0H3MAY5	65.935	33.7	21.0603	20.2335	20.925	21.9062	20.611	22.111	20.345	20.7656	20.2923	21.4373	23.7581	21.6507	15	5	3	7	6	10	5	2	3	2	2	10	9	0	102.44
I6XCB2_MYCTU Segregation and condensation protein B OS=Mycobacterium tuberculosis (strain ATCC 25618 / H37Rv) GN=scpB PE=1 SV=1;A0A0H3MAY7_MYCBP Segregation and condensation protein B OS=Mycobacterium bovis (strain BCG / Pasteur 1173P2) GN=BCG_1749 PE=3 SV	cell wall and cell processes	Rv1710	I6XCB2	A0A0H3MAY7	25.276	36.4	17.9763	21.1776	17.2529	17.1458	17.5897	16.8846	21.2696	19.908	19.183	19.1932	23.2117	22.1653	5	3	2	3	1	4	2	2	2	1	0	2	2	0	79.071
SECY_MYCTU Protein translocase subunit SecY OS=Mycobacterium tuberculosis (strain ATCC 25618 / H37Rv) GN=secY PE=1 SV=1;A0A0H3MAY8_MYCBP Protein translocase subunit SecY OS=Mycobacterium bovis (strain BCG / Pasteur 1173P2) GN=secY PE=3 SV=1	cell wall and cell processes	Rv0732	P9WGN3	A0A0H3MAY8	47.611	13.2	20.6621	20.5828	20.0259	22.0803	20.0106	21.7414	19.5987	20.6554	20.0136	19.4743	21.2951	20.1219	8	3	4	4	7	5	4	1	6	3	2	5	2	0	14.088
Y738_MYCTU Uncharacterized protein Rv0738 OS=Mycobacterium tuberculosis (strain ATCC 25618 / H37Rv) GN=Rv0738 PE=1 SV=1;A0A0H3MAZ1_MYCBP Uncharacterized protein OS=Mycobacterium bovis (strain BCG / Pasteur 1173P2) GN=BCG_0788 PE=4 SV=1	Conserved hypotheticals	Rv0738	P9WKS3	A0A0H3MAZ1	19.147	86.3	23.7797	25.4819	24.1001	24.5666	24.1193	25.9441	25.361	24.412	23.9989	25.2665	26.3402	23.5598	8	4	5	6	7	7	8	4	6	4	5	7	5	0	215.36
SYW_MYCTU Tryptophan--tRNA ligase OS=Mycobacterium tuberculosis (strain ATCC 25618 / H37Rv) GN=trpS PE=1 SV=1;A0A0H3MAZ4_MYCBP Tryptophan--tRNA ligase OS=Mycobacterium bovis (strain BCG / Pasteur 1173P2) GN=trpS PE=3 SV=1	information pathways	Rv3336c	P9WFT3	A0A0H3MAZ4	36.272	50	25.4694	25.5735	25.4722	24.9565	25.0701	25.9833	25.5456	25.6784	24.5128	26.519	25.9064	25.631	8	6	5	8	5	6	5	5	4	5	3	7	7	0	160.06
L7N672_MYCTU HDIG domain-containing protein OS=Mycobacterium tuberculosis (strain ATCC 25618 / H37Rv) GN=pcnA PE=1 SV=1;A0A0H3MAZ7_MYCBP Poly(A) polymerase pcnA OS=Mycobacterium bovis (strain BCG / Pasteur 1173P2) GN=pcnA PE=3 SV=1	information pathways	Rv3907c	L7N672	A0A0H3MAZ7	53.087	23.5	21.4277	20.7436	21.3955	22.546	18.6688	22.0749	18.2776	21.7904	22.3641	21.9927	21.3383	18.2929	7	2	1	2	3	2	3	1	3	2	2	6	0	0	65.038
P71813_MYCTU Uncharacterized protein OS=Mycobacterium tuberculosis (strain ATCC 25618 / H37Rv) GN=Rv0756c PE=1 SV=1;A0A0H3MB16_MYCBP Uncharacterized protein OS=Mycobacterium bovis (strain BCG / Pasteur 1173P2) GN=BCG_0808c PE=4 SV=1	Conserved hypotheticals	Rv0756c	P71813	A0A0H3MB16	24.884	46.5	23.4008	22.4991	22.041	24.1922	22.8881	25.1509	22.8944	24.4816	22.8581	24.2061	23.4237	22.6511	10	5	1	7	3	10	4	3	3	3	3	6	3	0	121.84
ADHB_MYCTU Alcohol dehydrogenase B OS=Mycobacterium tuberculosis (strain ATCC 25618 / H37Rv) GN=adhB PE=1 SV=1;A0A0H3MB17_MYCBP Possible zinc-containing alcohol dehydrogenase NAD dependant adhB OS=Mycobacterium bovis (strain BCG / Pasteur 1173P2) GN=adhB P	intermediary metabolism and respiration	Rv0761c	P9WQC7	A0A0H3MB17	39.747	58.9	25.2225	25.9871	25.9047	25.0168	24.3368	24.7004	24.7695	24.4726	25.3219	23.2529	26.2398	25.8333	12	6	6	9	5	8	9	6	5	8	5	10	8	0	200.21
I6Y4S7_MYCTU Possible 4-carboxymuconolactone decarboxylase (CMD) OS=Mycobacterium tuberculosis (strain ATCC 25618 / H37Rv) GN=Rv0771 PE=1 SV=1;A0A0H3MB27_MYCBP Possible 4-carboxymuconolactone decarboxylase OS=Mycobacterium bovis (strain BCG / Pasteur 1173P	intermediary metabolism and respiration	Rv0771	I6Y4S7	A0A0H3MB27	16.073	48.6	26.3708	23.733	25.5374	23.3748	27.7626	24.0581	24.9302	24.3615	24.9851	24.3322	22.0093	22.7666	5	5	3	5	5	3	5	4	3	3	3	5	4	0	47.141
A0A0H3MB35_MYCBP ESAT-6-like protein OS=Mycobacterium bovis (strain BCG / Pasteur 1173P2) GN=esxM PE=3 SV=1	Cell wall and cell processes		A0A0H3MB35		10.99	89.8	23.5411	23.4032	23.4282	24.5849	25.849	24.8485	23.6546	24.1531	23.8908	24.0963	24.4029	23.2104	1	0	1	0	1	0	1	0	1	0	1	0	0	0	147.71
ECCE5_MYCTU ESX-5 secretion system protein EccE5 OS=Mycobacterium tuberculosis (strain ATCC 25618 / H37Rv) GN=eccE5 PE=1 SV=1;A0A0H3MB40_MYCBP Uncharacterized protein OS=Mycobacterium bovis (strain BCG / Pasteur 1173P2) GN=BCG_1829 PE=4 SV=1	cell wall and cell processes	Rv1797	P9WJE3	A0A0H3MB40	44.178	15.8	19.2825	18.7745	18.768	21.2217	19.703	20.4796	18.3578	18.9779	19.3474	19.6093	19.1715	19.8407	5	2	2	2	3	3	3	1	2	1	1	3	1	0	15.652
VPB46_MYCTU Antitoxin VapB46 OS=Mycobacterium tuberculosis (strain ATCC 25618 / H37Rv) GN=vapB46 PE=1 SV=1;A0A0H3MB46_MYCBP Antitoxin OS=Mycobacterium bovis (strain BCG / Pasteur 1173P2) GN=BCG_3454c PE=3 SV=1	virulence, detoxification and adaptation	Rv3385c	P9WF13	A0A0H3MB46	11.03	64.7	18.7811	23.8225	18.2639	18.4831	20.5154	18.1274	23.911	18.7703	20.3624	18.9028	23.3169	20.8962	3	1	2	1	1	2	0	2	1	0	1	1	2	0	23.922
O50416_MYCTU Lipoprotein, LpqD OS=Mycobacterium tuberculosis (strain ATCC 25618 / H37Rv) GN=lpqD PE=1 SV=1;A0A0H3MB50_MYCBP Probable conserved lipoprotein lpqD OS=Mycobacterium bovis (strain BCG / Pasteur 1173P2) GN=lpqD PE=4 SV=1	cell wall and cell processes	Rv3390	O50416	A0A0H3MB50	25.056	45.3	21.9973	19.5153	21.4263	21.7042	23.0067	23.4443	18.7233	22.1179	20.6441	22.0573	23.2601	22.034	7	3	2	6	4	6	5	0	3	2	3	5	3	0	60.117
Y3401_MYCTU Uncharacterized glycosyl hydrolase Rv3401 OS=Mycobacterium tuberculosis (strain ATCC 25618 / H37Rv) GN=Rv3401 PE=1 SV=1;A0A0H3MB60_MYCBP Uncharacterized protein OS=Mycobacterium bovis (strain BCG / Pasteur 1173P2) GN=BCG_3471 PE=4 SV=1	intermediary metabolism and respiration	Rv3401	P9WN13	A0A0H3MB60	87.314	38.2	24.2022	22.8841	24.5537	25.4267	22.0409	23.9928	20.962	24.5073	23.469	21.9085	23.2583	23.1828	19	6	6	12	10	10	8	2	8	4	5	11	12	0	101.36
I6Y4V6_MYCTU Phosphoribosylformylglycinamidine cyclo-ligase OS=Mycobacterium tuberculosis (strain ATCC 25618 / H37Rv) GN=purM PE=1 SV=1;A0A0H3MB63_MYCBP Phosphoribosylformylglycinamidine cyclo-ligase OS=Mycobacterium bovis (strain BCG / Pasteur 1173P2) GN=	intermediary metabolism and respiration	Rv0809	I6Y4V6	A0A0H3MB63	38.393	30.8	20.5229	20.6796	20.7018	22.5736	21.9674	21.9048	18.5142	21.7745	18.7731	21.3651	21.0662	20.277	8	1	1	4	6	3	4	0	3	0	3	3	3	0	22.632
ILVG_MYCTU Acetolactate synthase large subunit IlvG OS=Mycobacterium tuberculosis (strain ATCC 25618 / H37Rv) GN=ilvG PE=1 SV=1;A0A0H3MB66_MYCBP Probable Acetolactate synthase ilvG (Acetohydroxy-acid synthase)(ALS) OS=Mycobacterium bovis (strain BCG / Past	intermediary metabolism and respiration	Rv1820	P9WG39	A0A0H3MB66	57.52	42.6	23.6042	19.0493	24.4442	23.2004	17.2652	23.6442	20.1739	23.3483	23.6311	23.7887	22.8676	23.1383	13	3	3	7	6	2	4	1	7	3	7	4	5	0	116.34
THTR_MYCTU Putative thiosulfate sulfurtransferase OS=Mycobacterium tuberculosis (strain ATCC 25618 / H37Rv) GN=cysA1 PE=1 SV=1;A0A0H3MB67_MYCBP Sulfurtransferase OS=Mycobacterium bovis (strain BCG / Pasteur 1173P2) GN=cysA2 PE=4 SV=1;A0A0H3M8T4_MYCBP Proba	intermediary metabolism and respiration	Rv0815c/Rv3117	P9WHF9	A0A0H3MB67	31.014	70.8	26.9912	25.8029	26.3991	26.2683	27.7444	26.5829	25.5068	26.4268	25.6252	26.8823	26.601	26.1787	23	19	12	22	15	19	19	13	14	16	9	22	20	0	188.61
IMDH_MYCTU Inosine-5-monophosphate dehydrogenase OS=Mycobacterium tuberculosis (strain ATCC 25618 / H37Rv) GN=guaB PE=1 SV=1;A0A0H3MB68_MYCBP Inosine-5-monophosphate dehydrogenase OS=Mycobacterium bovis (strain BCG / Pasteur 1173P2) GN=guaB2 PE=3 SV=1	intermediary metabolism and respiration	Rv3411c	P9WKI7	A0A0H3MB68	54.866	38.9	23.8387	21.709	22.5231	23.412	21.5614	22.8725	21.0595	23.8647	21.8	22.3757	21.0972	21.6585	12	2	3	6	6	9	4	2	3	3	4	6	2	0	63.187
GARA_MYCTU Glycogen accumulation regulator GarA OS=Mycobacterium tuberculosis (strain ATCC 25618 / H37Rv) GN=garA PE=1 SV=1;A0A0H3MB70_MYCBP Uncharacterized protein OS=Mycobacterium bovis (strain BCG / Pasteur 1173P2) GN=cfp17 PE=4 SV=1	Conserved hypotheticals	Rv1827	P9WJA9	A0A0H3MB70	17.251	84	26.129	26.5614	26.2048	23.9859	27.4747	25.7513	26.2753	25.541	26.2082	25.7588	27.5958	27.7369	10	8	7	9	8	8	8	8	7	8	5	9	8	0	155.44
DHMA2_MYCTU Haloalkane dehalogenase 2 OS=Mycobacterium tuberculosis (strain ATCC 25618 / H37Rv) GN=dhmA2 PE=1 SV=1;A0A0H3MB74_MYCBP Haloalkane dehalogenase OS=Mycobacterium bovis (strain BCG / Pasteur 1173P2) GN=dhmA PE=3 SV=1	intermediary metabolism and respiration	Rv1833c	P9WMS1	A0A0H3MB74	32.151	21.7	22.5524	19.606	22.409	21.9847	17.6153	21.4715	21.9894	21.2625	22.1064	20.0404	21.2213	19.1066	3	2	1	1	3	1	3	2	2	1	1	3	0	0	13.673
VPB13_MYCTU Putative antitoxin VapB13 OS=Mycobacterium tuberculosis (strain ATCC 25618 / H37Rv) GN=vapB13 PE=4 SV=1;A0A0H3MB78_MYCBP Uncharacterized protein OS=Mycobacterium bovis (strain BCG / Pasteur 1173P2) GN=BCG_1874c PE=4 SV=1	virulence, detoxification and adaptation	Rv1839c	P9WJ51	A0A0H3MB78	10.439	44.8	18.3789	19.5727	19.8141	19.1649	20.3706	18.3403	19.4626	19.4787	19.5239	19.8971	23.7108	20.0156	3	0	1	1	0	3	0	1	0	0	0	2	2	0	41.887
I6X7B3_MYCTU Conserved protein OS=Mycobacterium tuberculosis (strain ATCC 25618 / H37Rv) GN=Rv3438 PE=1 SV=1;A0A0H3MB85_MYCBP Uncharacterized protein OS=Mycobacterium bovis (strain BCG / Pasteur 1173P2) GN=BCG_3504 PE=4 SV=1	Conserved hypotheticals	Rv3438	I6X7B3	A0A0H3MB85	29.241	44.3	22.7627	22.4957	22.792	23.0599	21.6087	22.6298	20.7154	22.4525	23.1317	21.9881	17.9897	17.7183	6	2	2	3	5	2	3	1	3	3	2	1	1	0	16.219
A0A0H3MB87_MYCBP Probable NADH dehydrogenase ndh OS=Mycobacterium bovis (strain BCG / Pasteur 1173P2) GN=ndh PE=4 SV=1;P95160_MYCTU NADH dehydrogenase OS=Mycobacterium tuberculosis (strain ATCC 25618 / H37Rv) GN=ndh PE=1 SV=1	intermediary metabolism and respiration	Rv1854c	A0A0H3MB87	P95160	49.718	29.8	24.2811	24.3378	25.7538	24.8286	16.8704	23.8214	23.1192	23.5105	24.5144	23.146	22.1288	24.7416	7	4	3	4	4	3	3	2	3	3	3	3	3	0	128.91
P95150_MYCTU Probable short-chain type dehydrogenase OS=Mycobacterium tuberculosis (strain ATCC 25618 / H37Rv) GN=Rv1865c PE=1 SV=2;A0A0H3MB94_MYCBP Probable short-chain type dehydrogenase OS=Mycobacterium bovis (strain BCG / Pasteur 1173P2) GN=BCG_1901c P	intermediary metabolism and respiration	Rv1865c	P95150	A0A0H3MB94	30.405	45.1	21.873	23.5031	23.849	22.9646	18.4157	23.2076	21.1335	21.5213	22.4699	20.9951	21.0552	17.9987	7	2	3	4	5	2	5	1	5	2	3	4	2	0	42.698
RMLB_MYCTU dTDP-glucose 4,6-dehydratase OS=Mycobacterium tuberculosis (strain ATCC 25618 / H37Rv) GN=rmlB PE=1 SV=1;A0A0H3MB97_MYCBP dTDP-glucose 4,6-dehydratase OS=Mycobacterium bovis (strain BCG / Pasteur 1173P2) GN=rmlB1 PE=3 SV=1	intermediary metabolism and respiration	Rv3464	P9WN65	A0A0H3MB97	37.557	43.5	21.8321	22.5267	21.9963	22.6721	23.214	21.8893	22.4552	23.2693	22.7089	20.1796	23.0117	21.5892	10	5	2	6	5	7	5	2	2	3	2	7	6	0	68.076
I6X9Y7_MYCTU Conserved protein OS=Mycobacterium tuberculosis (strain ATCC 25618 / H37Rv) GN=Rv0854 PE=1 SV=1;A0A0H3MB99_MYCBP Uncharacterized protein OS=Mycobacterium bovis (strain BCG / Pasteur 1173P2) GN=BCG_0906 PE=4 SV=1	Conserved hypotheticals	Rv0854	I6X9Y7	A0A0H3MB99	16.345	42.2	20.3196	21.9037	21.5019	23.1291	24.4121	21.953	20.6412	22.5954	20.0548	18.6484	20.6259	20.0735	4	2	2	3	2	3	2	2	3	2	2	4	2	0	34.548
Y0859_MYCTU Putative acyltransferase Rv0859 OS=Mycobacterium tuberculosis (strain ATCC 25618 / H37Rv) GN=fadA PE=1 SV=1;A0A0H3MBA2_MYCBP Possible acyl-CoA thiolase fadA OS=Mycobacterium bovis (strain BCG / Pasteur 1173P2) GN=fadA PE=3 SV=1	lipid metabolism	Rv0859	O53871	A0A0H3MBA2	42.414	63	23.9449	24.9436	24.5354	24.6554	25.1227	25.5241	26.1442	24.1345	25.1304	24.3846	25.9927	25.01	18	9	9	12	13	10	12	7	7	9	8	12	12	0	256.2
O07754_MYCTU Conserved protein OS=Mycobacterium tuberculosis (strain ATCC 25618 / H37Rv) GN=Rv1875 PE=1 SV=1;A0A0H3MBA3_MYCBP Uncharacterized protein OS=Mycobacterium bovis (strain BCG / Pasteur 1173P2) GN=BCG_1911 PE=4 SV=1	Conserved hypotheticals	Rv1875	O07754	A0A0H3MBA3	15.979	72.8	20.8149	20.8805	20.9616	25.0264	22.8183	24.4716	20.0213	25.037	20.6439	24.1817	23.0785	21.2066	7	5	2	6	4	6	2	2	4	2	4	6	4	0	55.268
O06348_MYCTU Probable short-chain type dehydrogenase/reductase OS=Mycobacterium tuberculosis (strain ATCC 25618 / H37Rv) GN=Rv3485c PE=1 SV=1;A0A0H3MBB6_MYCBP Probable short-chain type dehydrogenase/reductase OS=Mycobacterium bovis (strain BCG / Pasteur 11	intermediary metabolism and respiration	Rv3485c	O06348	A0A0H3MBB6	33.193	28.7	18.7918	19.5263	18.8888	21.5294	17.6553	20.5346	19.3749	20.3697	18.8506	20.3599	19.9488	18.6657	7	2	2	2	3	3	3	1	3	2	3	5	3	0	19.173
O07738_MYCTU Monooxygenase OS=Mycobacterium tuberculosis (strain ATCC 25618 / H37Rv) GN=Rv1894c PE=1 SV=1;A0A0H3MBC2_MYCBP Uncharacterized protein OS=Mycobacterium bovis (strain BCG / Pasteur 1173P2) GN=BCG_1932c PE=4 SV=1	Conserved hypotheticals	Rv1894c	O07738	A0A0H3MBC2	40.185	25.5	19.8214	20.4582	17.8166	18.0149	20.7582	17.9228	19.4862	19.6659	19.206	22.0932	23.4962	22.3069	5	0	2	0	0	4	1	1	1	2	1	4	4	0	11.307
I6XHD6_MYCTU Mce-family protein Mce4D OS=Mycobacterium tuberculosis (strain ATCC 25618 / H37Rv) GN=mce4D PE=1 SV=1;A0A0H3MBC5_MYCBP Mce-family protein mce4D OS=Mycobacterium bovis (strain BCG / Pasteur 1173P2) GN=mce4D PE=4 SV=1	virulence, detoxification and adaptation	Rv3496c	I6XHD6	A0A0H3MBC5	47.233	26.8	21.9015	19.5738	21.6711	21.7309	20.4394	21.7989	20.3616	21.0923	18.3806	21.4746	22.4583	18.6909	6	1	1	2	2	5	2	0	2	1	2	3	0	0	20.348
SERC_MYCTU Phosphoserine aminotransferase OS=Mycobacterium tuberculosis (strain ATCC 25618 / H37Rv) GN=serC PE=1 SV=1;A0A0H3MBD0_MYCBP Phosphoserine aminotransferase OS=Mycobacterium bovis (strain BCG / Pasteur 1173P2) GN=serC PE=3 SV=1	intermediary metabolism and respiration	Rv0884c	P9WQ73	A0A0H3MBD0	40.233	56.1	26.3916	26.2888	26.216	26.8947	23.472	27.5453	26.8429	26.7698	27.0437	26.9539	26.6246	26.2964	14	12	10	13	9	11	10	6	9	8	7	11	12	0	243.21
O07726_MYCTU Conserved protein OS=Mycobacterium tuberculosis (strain ATCC 25618 / H37Rv) GN=Rv1906c PE=1 SV=3;A0A0H3MBD1_MYCBP Uncharacterized protein OS=Mycobacterium bovis (strain BCG / Pasteur 1173P2) GN=BCG_1945c PE=4 SV=1	Conserved hypotheticals	Rv1906c	O07726	A0A0H3MBD1	15.536	46.8	19.2341	19.751	18.3852	17.838	20.6608	21.6236	20.1823	18.2005	19.7592	19.0891	18.8604	18.7875	3	0	0	1	1	3	2	0	0	1	0	1	1	0	6.1881
O07721_MYCTU Oxidoreductase OS=Mycobacterium tuberculosis (strain ATCC 25618 / H37Rv) GN=fadB5 PE=1 SV=1;A0A0H3MBD5_MYCBP Possible oxidoreductase fadB5 OS=Mycobacterium bovis (strain BCG / Pasteur 1173P2) GN=fadB5 PE=4 SV=1	lipid metabolism	Rv1912c	O07721	A0A0H3MBD5	35.813	39.5	19.0522	21.96	20.8412	22.8538	21.8224	22.0369	19.9585	22.9028	21.6153	22.9349	21.8901	21.5722	10	2	5	8	9	8	6	1	6	5	4	7	6	0	40.106
P95290_MYCTU Probable lipase LipD OS=Mycobacterium tuberculosis (strain ATCC 25618 / H37Rv) GN=lipD PE=1 SV=1;A0A0H3MBE4_MYCBP Probable lipase lipD OS=Mycobacterium bovis (strain BCG / Pasteur 1173P2) GN=lipD PE=4 SV=1	intermediary metabolism and respiration	Rv1923	P95290	A0A0H3MBE4	47.169	10.3	20.1248	18.797	20.5475	19.973	17.6993	18.2344	20.4713	20.4059	19.956	19.6033	19.7789	21.011	4	1	0	1	4	2	2	0	2	1	2	2	1	0	47.224
PRRA_MYCTU Transcriptional regulatory protein PrrA OS=Mycobacterium tuberculosis (strain ATCC 25618 / H37Rv) GN=prrA PE=1 SV=1;A0A0H3MBF0_MYCBP Two component response transcriptional regulatory protein prrA OS=Mycobacterium bovis (strain BCG / Pasteur 1173	Regulatory proteins	Rv0903c	P9WGM1	A0A0H3MBF0	25.008	52.8	21.6626	22.834	21.7348	21.8476	22.05	22.5964	22.0938	23.2912	21.6707	23.7293	22.9011	22.0975	9	5	3	5	4	4	3	3	2	4	2	7	6	0	61.333
O05910_MYCTU Conserved protein OS=Mycobacterium tuberculosis (strain ATCC 25618 / H37Rv) GN=Rv0918 PE=4 SV=3;A0A0H3MBF7_MYCBP Uncharacterized protein OS=Mycobacterium bovis (strain BCG / Pasteur 1173P2) GN=BCG_0970 PE=4 SV=1	Conserved hypotheticals	Rv0918	O05910	A0A0H3MBF7	17.388	15.8	23.6718	18.8544	22.3509	21.7515	18.2126	18.7807	17.8319	17.99	18.6199	19.2389	17.2221	22.4478	1	1	0	1	1	0	0	1	0	1	1	0	1	0	6.1168
EPHB_MYCTU Epoxide hydrolase B OS=Mycobacterium tuberculosis (strain ATCC 25618 / H37Rv) GN=ephB PE=1 SV=1;A0A0H3MBG4_MYCBP Probable epoxide hydrolase ephB OS=Mycobacterium bovis (strain BCG / Pasteur 1173P2) GN=ephB PE=4 SV=1	virulence, detoxification and adaptation	Rv1938	I6YC03	A0A0H3MBG4	39.297	11.5	23.186	19.385	23.0116	22.6406	17.0638	22.381	19.7541	18.1453	18.5988	19.5126	19.2908	18.824	2	2	1	2	2	0	2	0	0	1	0	1	0	0	12.321
I6XWK6_MYCTU Replication protein OS=Mycobacterium tuberculosis (strain ATCC 25618 / H37Rv) GN=Rv0923c PE=1 SV=1;A0A0H3MBG5_MYCBP Uncharacterized protein OS=Mycobacterium bovis (strain BCG / Pasteur 1173P2) GN=BCG_0975c PE=4 SV=1	Conserved hypotheticals	Rv0923c	I6XWK6	A0A0H3MBG5	39.059	27.7	21.7825	19.7237	21.6231	22.7187	18.2803	22.3412	22.1903	21.3273	19.2447	21.42	21.4527	17.2876	6	2	1	3	5	1	4	2	2	2	2	5	0	0	64.508
A0A0H3MBJ4_MYCBP Probable conserved membrane protein OS=Mycobacterium bovis (strain BCG / Pasteur 1173P2) GN=BCG_3652c PE=4 SV=1;O53572_MYCTU Probable conserved membrane protein OS=Mycobacterium tuberculosis (strain ATCC 25618 / H37Rv) GN=Rv3587c PE=1 SV=3	cell wall and cell processes	Rv3587c	A0A0H3MBJ4	O53572	27.002	34.6	24.7513	24.0996	24.598	25.1228	20.9537	25.0347	24.5753	25.8664	23.5736	24.4232	22.7311	21.1819	9	5	4	5	7	6	6	3	5	3	5	3	2	0	111.86
MHUD_MYCTU Heme-degrading monooxygenase HmoB OS=Mycobacterium tuberculosis (strain ATCC 25618 / H37Rv) GN=mhuD PE=1 SV=1;A0A0H3MBJ7_MYCBP Uncharacterized protein OS=Mycobacterium bovis (strain BCG / Pasteur 1173P2) GN=TB11.2 PE=4 SV=1	intermediary metabolism and respiration	Rv3592	P9WKH3	A0A0H3MBJ7	11.185	84.8	27.161	26.3583	26.7352	26.9811	19.3016	26.6653	26.58	26.8553	27.2134	27.4297	25.7893	24.7774	5	5	5	5	5	3	5	5	5	5	4	5	5	0	260.53
LSR2_MYCTU Nucleoid-associated protein Lsr2 OS=Mycobacterium tuberculosis (strain ATCC 25618 / H37Rv) GN=lsr2 PE=1 SV=1;A0A0H3MBK0_MYCBP Probable lsr2 protein OS=Mycobacterium bovis (strain BCG / Pasteur 1173P2) GN=lsr2 PE=4 SV=1	information pathways	Rv3597c	P9WIP7	A0A0H3MBK0	12.098	50.9	22.5803	20.4931	22.1965	21.8586	25.7556	22.2302	21.7199	21.4702	21.9213	21.7457	23.4189	24.7538	4	2	2	3	3	3	3	3	3	3	4	3	4	0	14.543
A0A0H3MBK2_MYCBP Uncharacterized protein OS=Mycobacterium bovis (strain BCG / Pasteur 1173P2) GN=BCG_2026 PE=4 SV=1;VPB15_MYCTU Antitoxin VapB15 OS=Mycobacterium tuberculosis (strain ATCC 25618 / H37Rv) GN=vapB15 PE=1 SV=1	virulence, detoxification and adaptation	Rv2009	A0A0H3MBK2	P9WLM7	8.8847	71.2	19.8016	18.5557	19.9418	18.4711	21.9982	18.9303	18.2167	18.7316	18.9381	19.7119	20.6212	20.3853	4	0	0	0	0	4	0	2	0	2	0	3	3	0	13.897
PSTS3_MYCTU Phosphate-binding protein PstS 3 OS=Mycobacterium tuberculosis (strain ATCC 25618 / H37Rv) GN=pstS3 PE=1 SV=1;PSTS3_MYCBP Phosphate-binding protein PstS3 OS=Mycobacterium bovis (strain BCG / Pasteur 1173P2) GN=pstS3 PE=1 SV=1	cell wall and cell processes	Rv0928	P9WGT7	A0A0H3MBK5	37.953	53.5	25.9165	25.685	26.0867	26.4721	27.0024	26.7316	24.9007	26.4931	25.3101	27.0035	25.6554	25.295	10	8	6	8	8	8	8	7	8	5	6	8	9	0	302.85
HPRT_MYCTU Hypoxanthine-guanine phosphoribosyltransferase OS=Mycobacterium tuberculosis (strain ATCC 25618 / H37Rv) GN=hpt PE=1 SV=1;A0A0H3MBL1_MYCBP Hypoxanthine-guanine phosphoribosyltransferase hpt OS=Mycobacterium bovis (strain BCG / Pasteur 1173P2) GN	intermediary metabolism and respiration	Rv3624c	P9WHQ9	A0A0H3MBL1	22.251	26.2	17.9703	21.2982	19.4535	18.6033	20.4301	19.1766	20.0427	19.3836	19.116	19.1249	21.2834	19.6938	4	1	2	3	2	3	2	1	1	0	1	3	3	0	18.408
PSTS2_MYCTU Phosphate-binding protein PstS 2 OS=Mycobacterium tuberculosis (strain ATCC 25618 / H37Rv) GN=pstS2 PE=1 SV=1;PSTS2_MYCBP Phosphate-binding protein PstS2 OS=Mycobacterium bovis (strain BCG / Pasteur 1173P2) GN=pstS2 PE=1 SV=1	cell wall and cell processes	Rv0932c	P9WGT9	A0A0H3MBL5	37.864	51.1	26.4609	24.929	26.902	25.3382	26.6337	26.5204	25.1631	24.501	26.6262	24.75	25.5528	23.6845	10	8	5	7	6	6	8	6	5	5	5	10	7	0	147.86
GALE_MYCTU UDP-glucose 4-epimerase OS=Mycobacterium tuberculosis (strain ATCC 25618 / H37Rv) GN=galE1 PE=1 SV=1;A0A0H3MBM0_MYCBP UDP-glucose 4-epimerase galE1 OS=Mycobacterium bovis (strain BCG / Pasteur 1173P2) GN=galE1 PE=4 SV=1	intermediary metabolism and respiration	Rv3634c	P9WN67	A0A0H3MBM0	33.581	43.6	23.6517	22.4046	23.3098	23.7948	21.8997	23.6452	21.998	24.0251	23.1845	23.4041	24.698	22.8134	11	5	2	8	6	6	5	2	2	3	3	6	4	0	95.224
L0TB61_MYCTU Conserved transmembrane protein OS=Mycobacterium tuberculosis (strain ATCC 25618 / H37Rv) GN=Rv2037c PE=1 SV=1;A0A0H3MBM9_MYCBP Possible conserved transmembrane protein OS=Mycobacterium bovis (strain BCG / Pasteur 1173P2) GN=BCG_2056c PE=4 SV=	cell wall and cell processes	Rv2037c	L0TB61	A0A0H3MBM9	34.688	59.6	25.1771	23.4235	24.8032	24.5058	23.0287	24.5993	23.3062	24.0668	24.428	24.0226	23.5388	22.7282	9	5	6	5	5	4	9	4	5	5	7	7	4	0	182.41
Y2047_MYCTU Uncharacterized protein Rv2047c OS=Mycobacterium tuberculosis (strain ATCC 25618 / H37Rv) GN=Rv2047c PE=1 SV=1;A0A0H3MBN3_MYCBP Uncharacterized protein OS=Mycobacterium bovis (strain BCG / Pasteur 1173P2) GN=BCG_2066c PE=4 SV=1	Conserved hypotheticals	Rv2047c	P9WIH5	A0A0H3MBN3	91.384	14.6	17.787	19.5325	21.1098	22.4809	18.4886	22.283	19.387	19.8253	19.8867	20.0612	19.2475	18.5855	9	0	0	2	8	4	4	1	7	0	3	1	0	0	24.88
END3_MYCTU Endonuclease III OS=Mycobacterium tuberculosis (strain ATCC 25618 / H37Rv) GN=nth PE=1 SV=1;A0A0H3MBP5_MYCBP Endonuclease III OS=Mycobacterium bovis (strain BCG / Pasteur 1173P2) GN=nth PE=3 SV=1	information pathways	Rv3674c	P9WQ11	A0A0H3MBP5	27.03	31	18.2376	22.3178	17.9336	22.5774	20.9927	21.7089	20.1151	19.1324	20.0383	19.8803	19.1946	18.8676	4	1	2	1	3	2	3	1	1	1	1	0	0	0	13.005
I6X824_MYCTU Uncharacterized protein OS=Mycobacterium tuberculosis (strain ATCC 25618 / H37Rv) GN=Rv3678A PE=1 SV=1;A0A0H3MBQ0_MYCBP Uncharacterized protein OS=Mycobacterium bovis (strain BCG / Pasteur 1173P2) GN=BCG_3737c PE=4 SV=1	Conserved hypotheticals	Rv3678A	I6X824	A0A0H3MBQ0	5.9147	94.3	26.94	29.695	27.0638	26.9274	27.5484	29.9123	30.0099	27.4681	28.9838	29.4342	29.461	26.9181	3	3	3	3	3	2	3	3	3	3	3	3	3	0	168.6
LPPJ_MYCTU Putative lipoprotein LppJ OS=Mycobacterium tuberculosis (strain ATCC 25618 / H37Rv) GN=lppJ PE=1 SV=1;A0A0H3MBQ5_MYCBP Possible lipoprotein LppJ OS=Mycobacterium bovis (strain BCG / Pasteur 1173P2) GN=lppJ PE=4 SV=1	cell wall and cell processes	Rv2080	P9WK77	A0A0H3MBQ5	20.324	40.1	19.4318	18.4044	20.0855	20.7734	18.0416	21.3133	19.9798	20.4263	18.9584	18.3477	20.3777	18.8036	4	1	1	1	2	2	2	1	2	1	1	1	2	0	83.447
A0A0H3MBR1_MYCBP 5-3 exonuclease OS=Mycobacterium bovis (strain BCG / Pasteur 1173P2) GN=BCG_2110 PE=4 SV=1;EX53_MYCTU 5-3 exonuclease OS=Mycobacterium tuberculosis (strain ATCC 25618 / H37Rv) GN=Rv2090 PE=1 SV=1	information pathways	Rv2090	A0A0H3MBR1	P9WNU3	37.894	38.3	20.7569	18.4495	20.7369	21.5642	18.9809	22.0074	18.7833	20.7604	19.6541	18.7594	19.2429	17.8223	10	4	2	4	5	6	4	1	4	0	2	1	0	0	28.622
PAFB_MYCTU Protein PafB OS=Mycobacterium tuberculosis (strain ATCC 25618 / H37Rv) GN=pafB PE=1 SV=1;A0A0H3MBR3_MYCBP Uncharacterized protein OS=Mycobacterium bovis (strain BCG / Pasteur 1173P2) GN=BCG_2116c PE=4 SV=1	intermediary metabolism and respiration	Rv2096c	P9WIM1	A0A0H3MBR3	35.3	44.6	25.4417	23.8678	25.5548	24.1361	23.9633	25.0242	24.4534	23.5765	25.3799	23.6582	24.1528	24.5693	10	4	3	5	3	7	4	3	3	3	3	4	5	0	127.51
VPC37_MYCTU Ribonuclease VapC37 OS=Mycobacterium tuberculosis (strain ATCC 25618 / H37Rv) GN=vapC37 PE=1 SV=3;A0A0H3MBR4_MYCBP Ribonuclease VapC OS=Mycobacterium bovis (strain BCG / Pasteur 1173P2) GN=vapC PE=3 SV=1	virulence, detoxification and adaptation	Rv2103c	O53501	A0A0H3MBR4	15.662	25	20.8731	18.838	21.032	20.5911	17.2397	21.0121	18.8326	21.1392	18.7571	20.6682	18.6282	19.8586	3	2	0	2	2	0	2	1	1	0	2	2	0	0	12.509
O86318_MYCTU Probable acetyl-/propionyl-CoA carboxylase (Beta subunit) AccD2 OS=Mycobacterium tuberculosis (strain ATCC 25618 / H37Rv) GN=accD2 PE=1 SV=1;A0A0H3MBR5_MYCBP Probable acetyl-/propionyl-coa carboxylase (Beta subunit) accD2 OS=Mycobacterium bovi	lipid metabolism	Rv0974c	O86318	A0A0H3MBR5	56.256	12.7	19.3607	18.1283	17.9292	20.1529	17.3404	20.0767	19.2233	18.8725	19.6897	18.8431	18.6484	19.6979	5	2	0	1	3	3	3	1	2	1	2	5	0	0	9.907
I6X827_MYCTU Conserved protein OS=Mycobacterium tuberculosis (strain ATCC 25618 / H37Rv) GN=Rv3683 PE=1 SV=1;A0A0H3MBS4_MYCBP Uncharacterized protein OS=Mycobacterium bovis (strain BCG / Pasteur 1173P2) GN=BCG_3742 PE=4 SV=1	Conserved hypotheticals	Rv3683	I6X827	A0A0H3MBS4	34.394	45.8	22.4332	21.5844	22.1529	22.8764	22.2429	22.8949	19.66	21.8721	21.4555	20.9034	21.1945	21.8185	10	4	3	7	9	3	7	0	4	3	1	8	3	0	109.07
[truncated: 589 more rows]

## Sheet: Significant proteins
3 hrs	24 hrs	48 hrs	Fasta Header TB	Fasta Header BCG	Protein ID TB	Protein ID BCG	ORF number Mtb	functional category	Mol. weight [kDa]	3hr ratio UP	3hr ratio down	24hr ratio Up	24 hr ratio down	48 hr ratio Up	48 hr ratio down	LFQ intensity Control3A	LFQ intensity Control3B	Control 3 hr LFQ intensity average	2^(Control 3hr LFQ intensity average)	LFQ intensity Control24A	LFQ intensity Control24B	Control 24 hr LFQ intensity average	2^(Control 24hr LFQ intensity average)	LFQ intensity Control48A	LFQ intensity Control48B	Control 48 hr LFQ intensity average	2^(Control 48hr LFQ intensity average)	LFQ intensity Dimer3A	LFQ intensity Dimer3B	Dimer 3 hr LFQ intensity average	2^(DImer 3hr LFQ intensity average)	LFQ intensity Dimer24A	LFQ intensity Dimer24B	Dimer 24 hr LFQ intensity average	2^(DImer 24hr LFQ intensity average)	LFQ intensity Dimer48A	LFQ intensity Dimer48B	Dimer 48 hr LFQ intensity average	2^(DImer 48hr LFQ intensity average)	Unique peptides	Sequence coverage [%]	Unique peptides Control3A	Unique peptides Control3B	Unique peptides Control24A	Unique peptides Control24B	Unique peptides Control48A	Unique peptides Control48B	Unique peptides Dimer3A	Unique peptides Dimer3B
[truncated: 81 more rows]
[truncated: 4 more columns]
